# Supplementary material
Source: PubMed Central journal article supplement (PMC3430129)

**Copper-Catalyzed Intramolecular Alkene Carboetherification: Synthesis of Fused-Ring and Bridged-Ring Tetrahydrofurans**

Yan Miller, Lei Miao, Azade Hosseini and Sherry R. Chemler\*

Department of Chemistry, University at Buffalo,

The State University of New York, Buffalo, New York 14260, schemler@buffalo.edu

**Supporting Information 2:  $^1\text{H}$  NMR and  $^{13}\text{C}$  NMR of substrates and products**

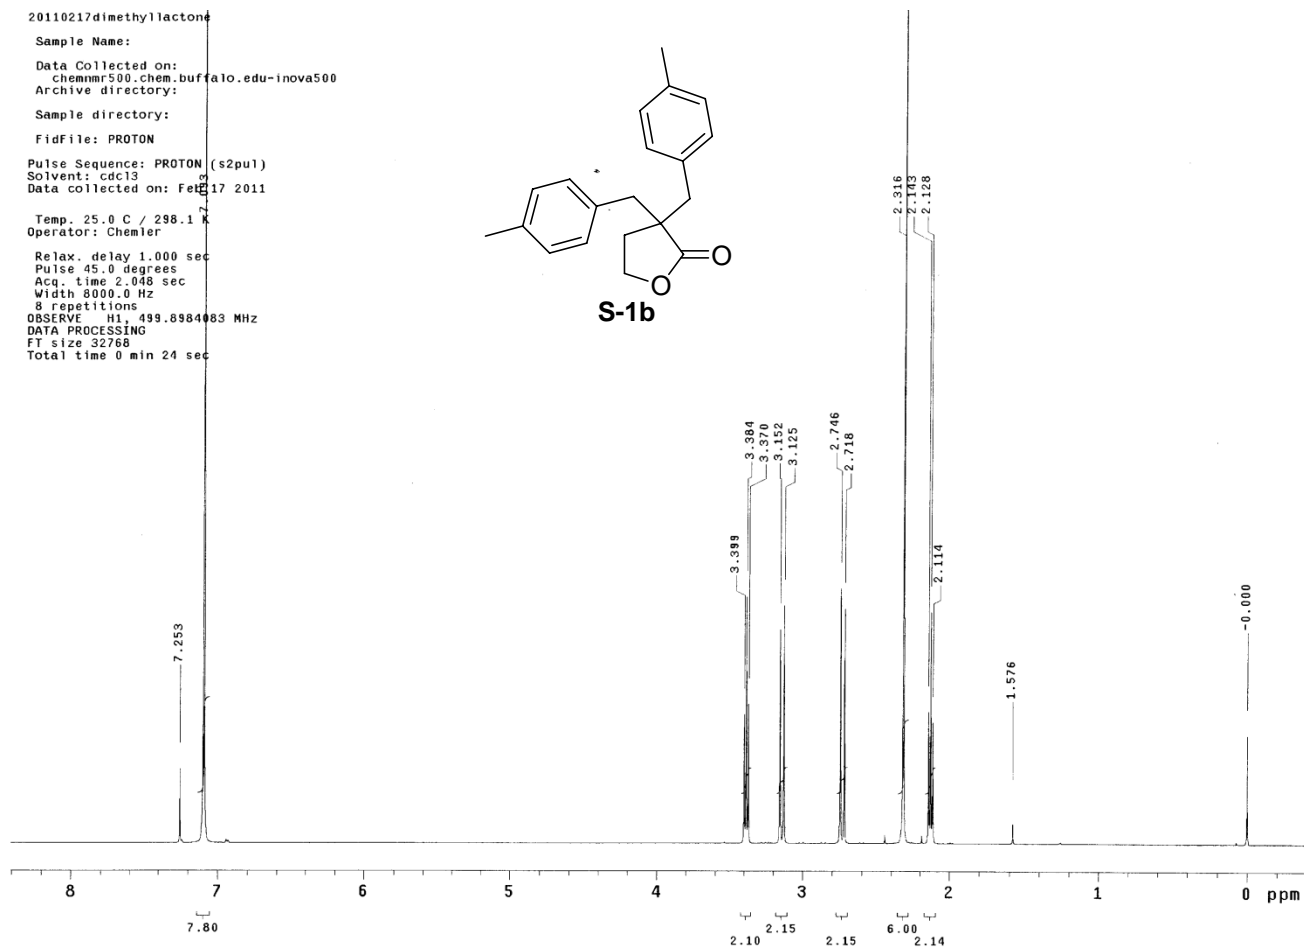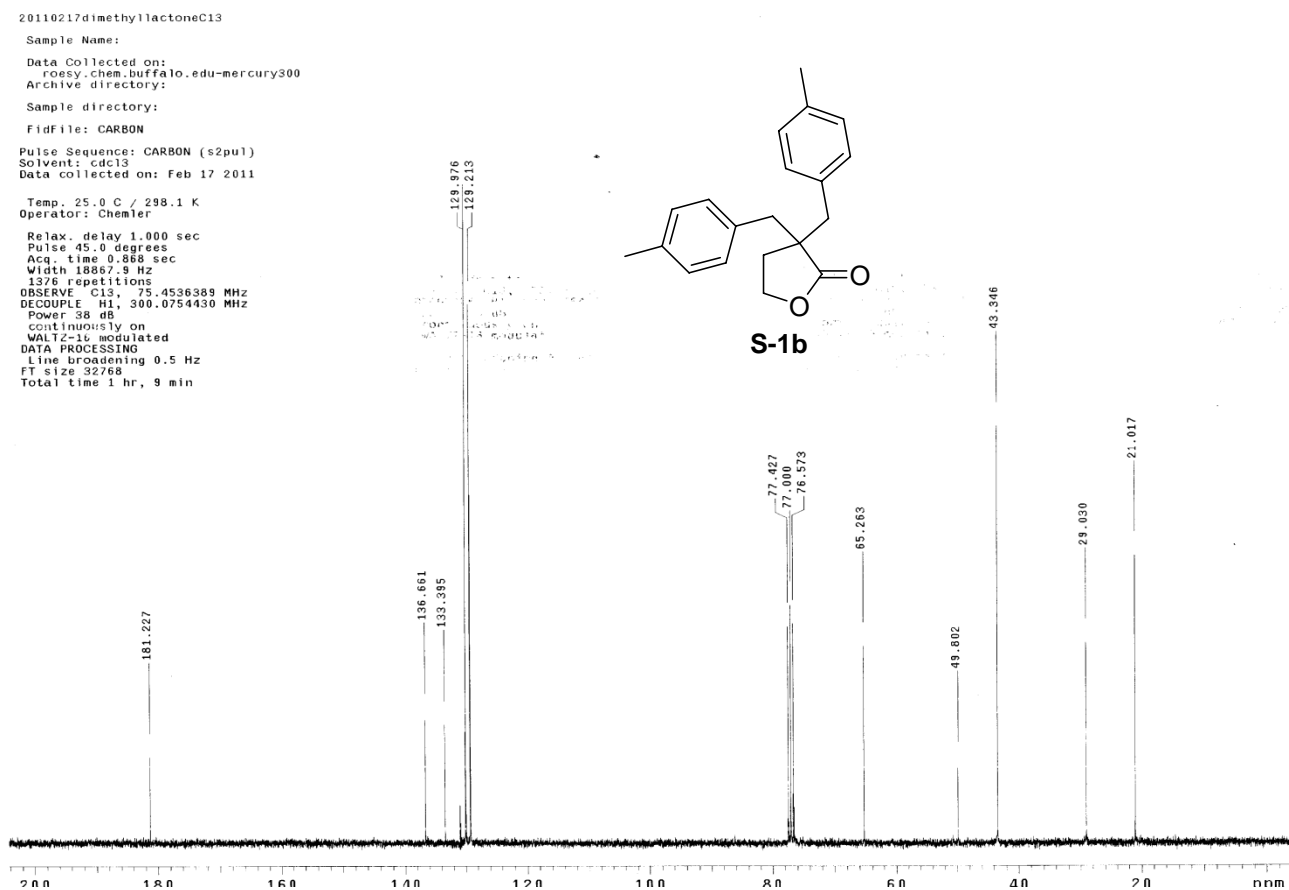

20110217dimethylalcoholsubstrate

Sample Name:

Data Collected on:  
chemnmr500.chem.buffalo.edu-inova500  
Archive directory:

Sample directory:

FidFile: PROTON

Pulse Sequence: PROTON (s2pu1)  
Solvent: cdcl3  
Data collected on: Feb 17 2011Temp. 25.0 C / 298.1 K  
Operator: ChemlerRelax. delay 1.000 sec  
Pulse 45.0 degrees  
Acq. time 2.048 sec  
Width 8000.0 Hz  
3 repetitions  
OBSERVE H1, 499.8984122 MHz  
DATA PROCESSING  
FT size 32768  
Total time 0 min 24 sec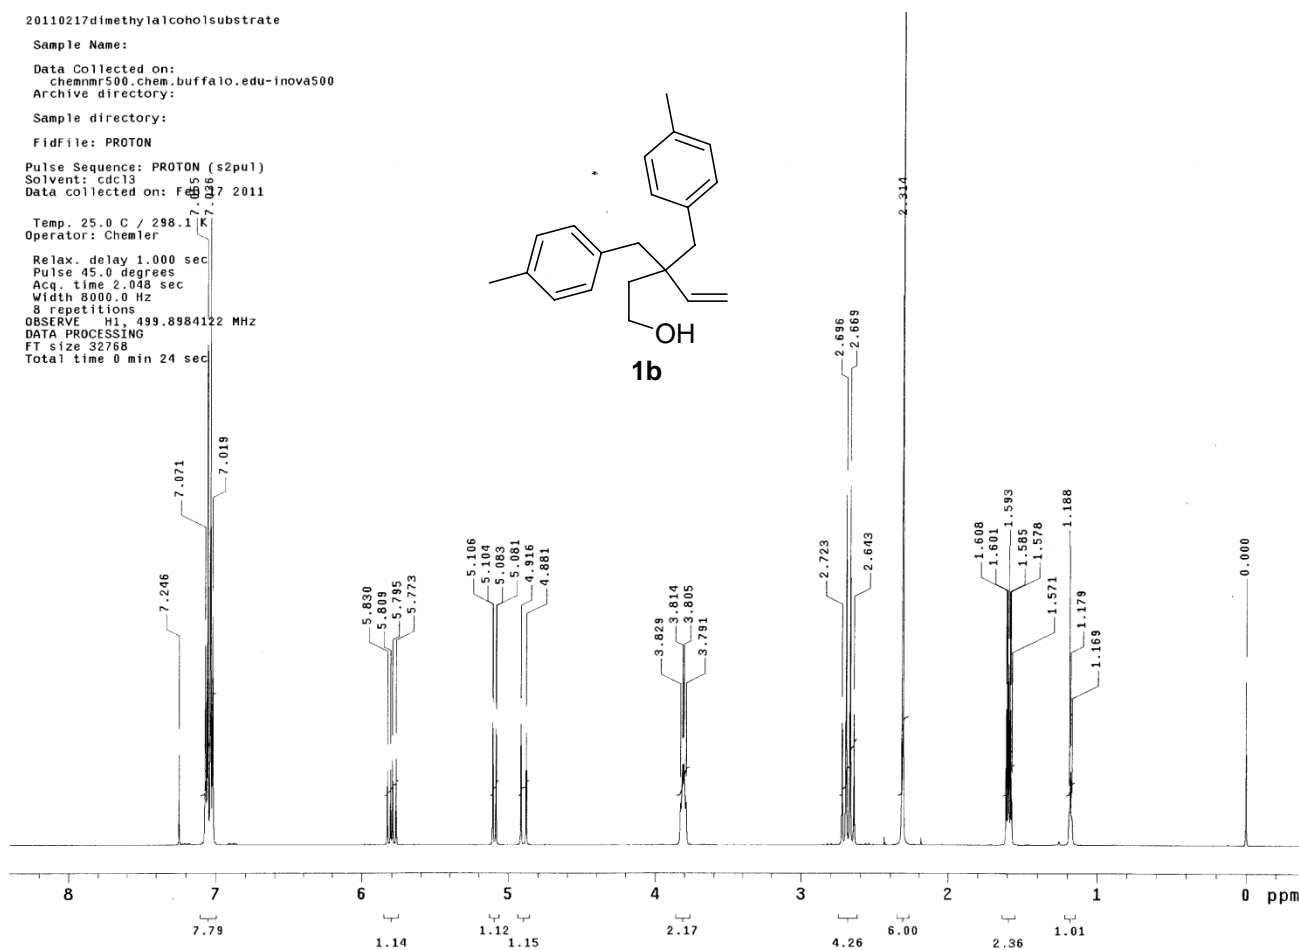

20110218dimethylalcoholsubstrateC13

Sample Name:

Data Collected on:  
Foesy.chem.buffalo.edu-mercury300  
Archive directory:

Sample directory:

FidFile: CARBON

Pulse Sequence: CARBON (s2pu1)  
Solvent: cdcl3  
Data collected on: Feb 18 2011Temp. 25.0 C / 298.1 K  
Operator: ChemlerRelax. delay 1.000 sec  
Pulse 45.0 degrees  
Acq. time 0.868 sec  
Width 18867.9 Hz  
1504 repetitions  
OBSERVE C13, 75.4536400 MHz  
DECOUPLE H1, 300.0754430 MHz  
Power 38 dB  
continuously on  
WALTZ-16 modulated  
DATA PROCESSING  
Line broadening 0.5 Hz  
FT size 32768  
Total time 1 hr, 9 min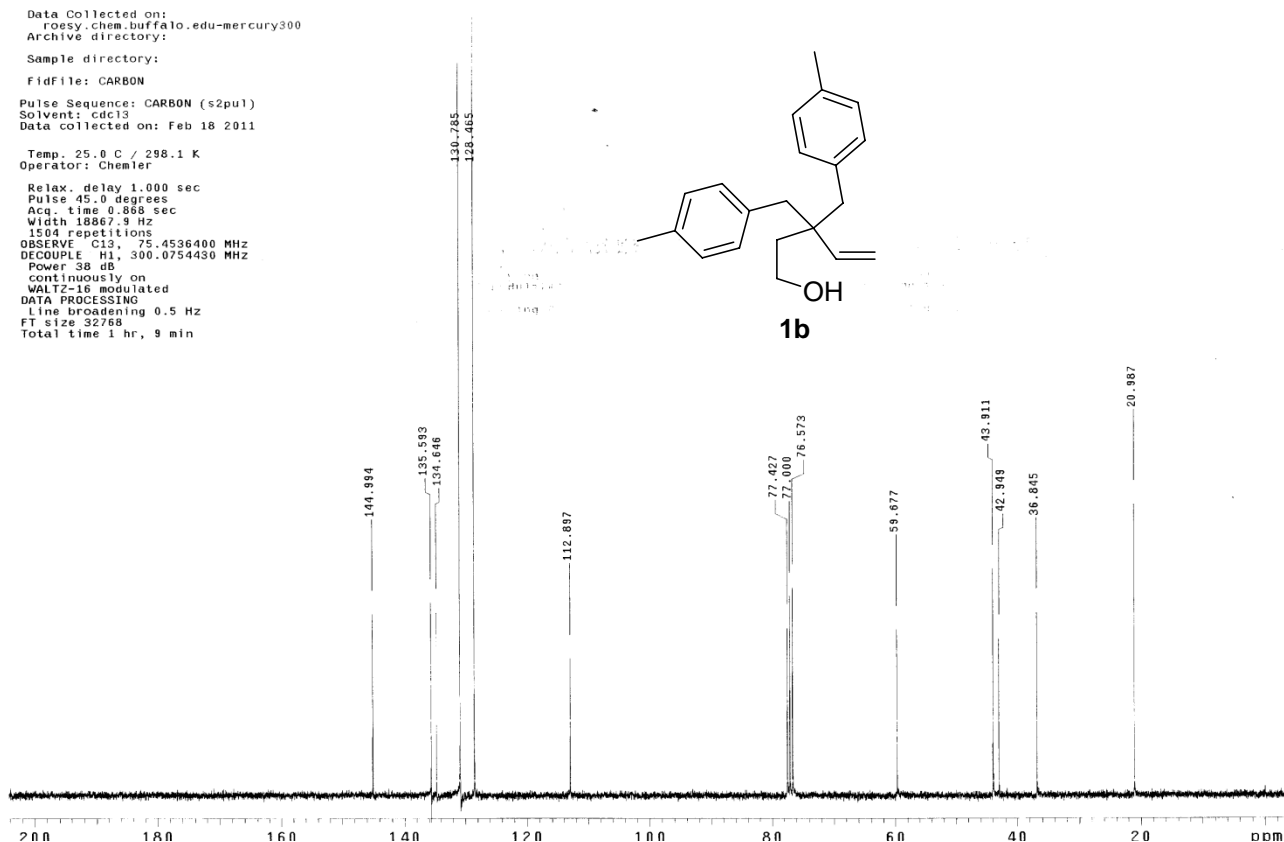

20110214dimethoxylactone

Sample Name:

Data Collected on:  
chemnmr500.chem.buffalo.edu-inova500  
Archive directory:

Sample directory:

FidFile: PROTON

Pulse Sequence: PROTON (s2pu1)  
Solvent: cdc13  
Data collected on: Feb 14 2011Temp. 25.0 C / 298.1 K  
Operator: ChemlerRelax. delay 1.000 sec  
Pulse 45.0 degrees  
Acq. time 2.048 sec  
Width 8000.0 Hz  
8 repetitionsOBSERVE H1, 499.8983908 MHZ  
DATA PROCESSING  
FT size 32768  
Total time 0 min 24 sec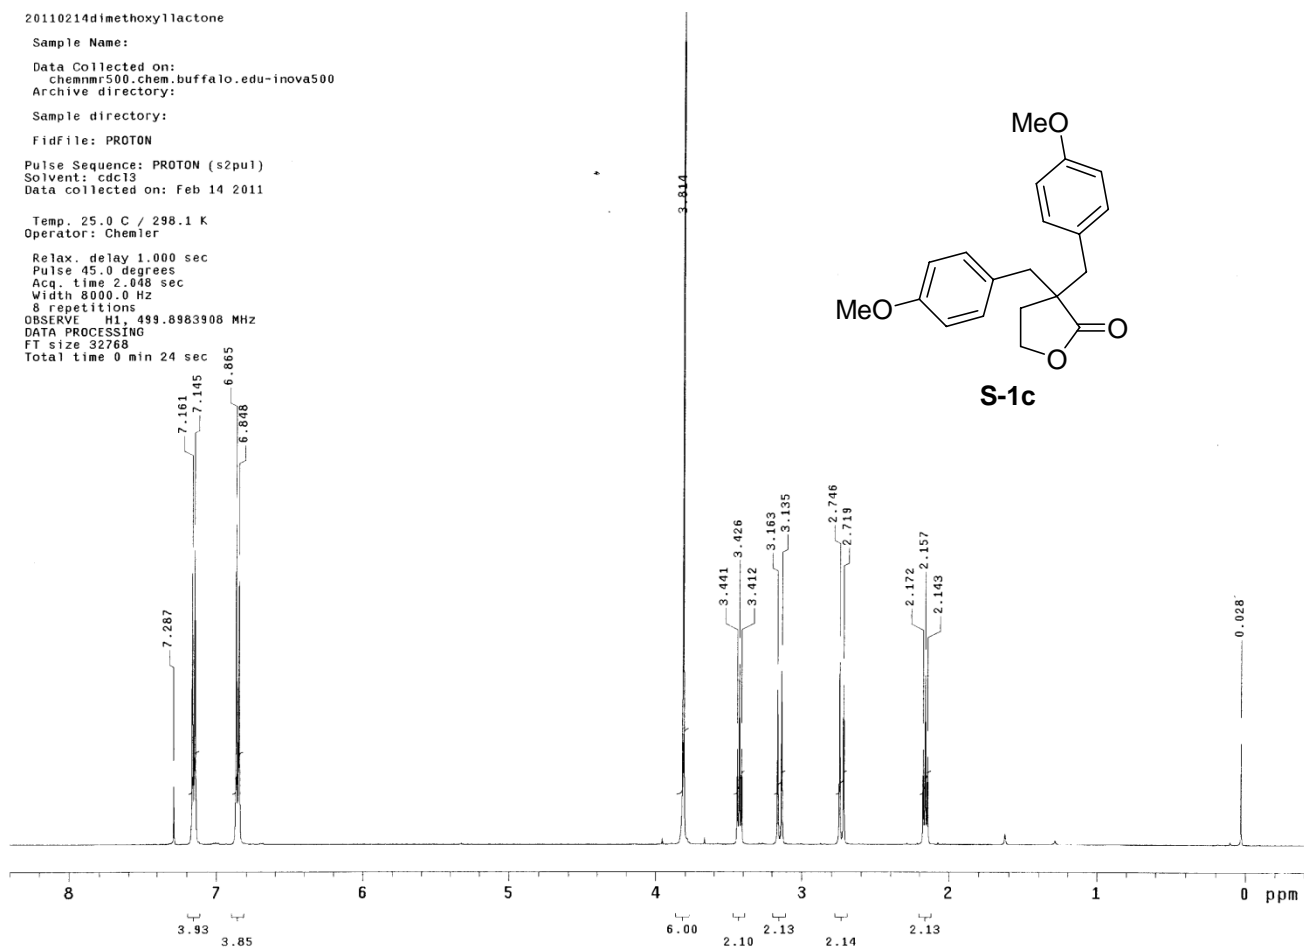

20110215dimethoxylactoneC13

Sample Name:

Data Collected on:  
foosy.chem.buffalo.edu-mercury300  
Archive directory:

Sample directory:

FidFile: CARBON

Pulse Sequence: CARBON (s2pu1)  
Solvent: cdc13  
Data collected on: Feb 15 2011Temp. 25.0 C / 298.1 K  
Operator: ChemlerRelax. delay 1.000 sec  
Pulse 45.0 degrees  
Acq. time 0.868 sec  
Width 18867.9 Hz  
768 repetitionsOBSERVE C13, 75.4536389 MHZ  
DECOUPLE H1, 300.0754430 MHZ  
Power 38 dB  
continuously on  
WALTZ-16 modulated  
DATA PROCESSING  
Line broadening 0.5 Hz  
FT size 32768  
Total time 1 hr, 9 min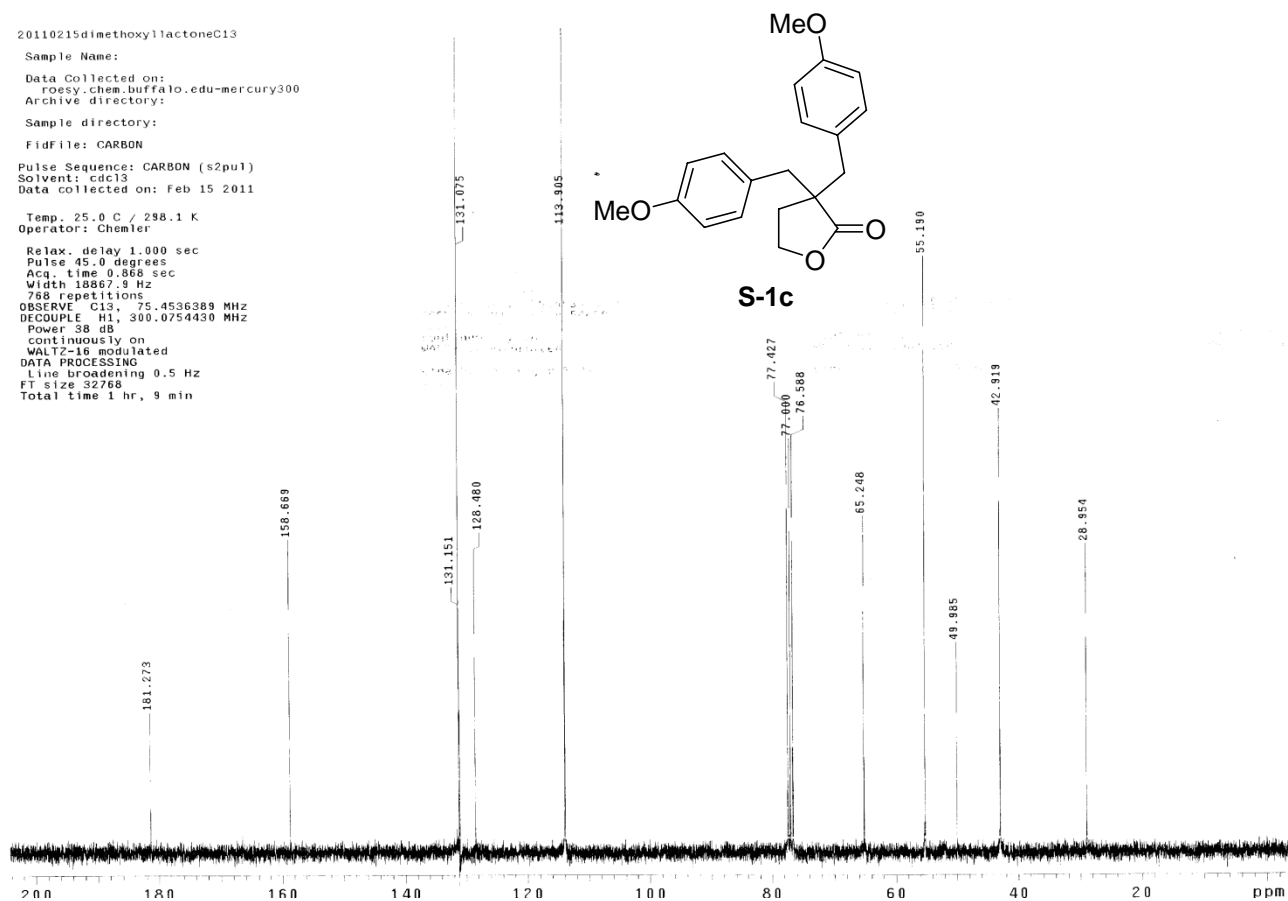



20110219dimethoxyalcoholsubstrate

Sample Name:  
 Data Collected on:  
 chemnmr500.chem.buffalo.edu-inova500  
 Archive directory:  
 Sample directory:  
 FidFile: PROTON

Pulse Sequence: PROTON (s2pul)  
 Solvent: cdcl3  
 Data collected on: Feb 19 2011

Operator: Chemler

Relax. delay 1.000 sec  
 Pulse 45.0 degrees  
 Acq. time 2.048 sec  
 Width 8000.0 Hz  
 8 repetitions  
 OBSERVE H1: 400.141032 MHz  
 DATA PROCESSING  
 FT size 32768  
 Total time 0 min 24 sec

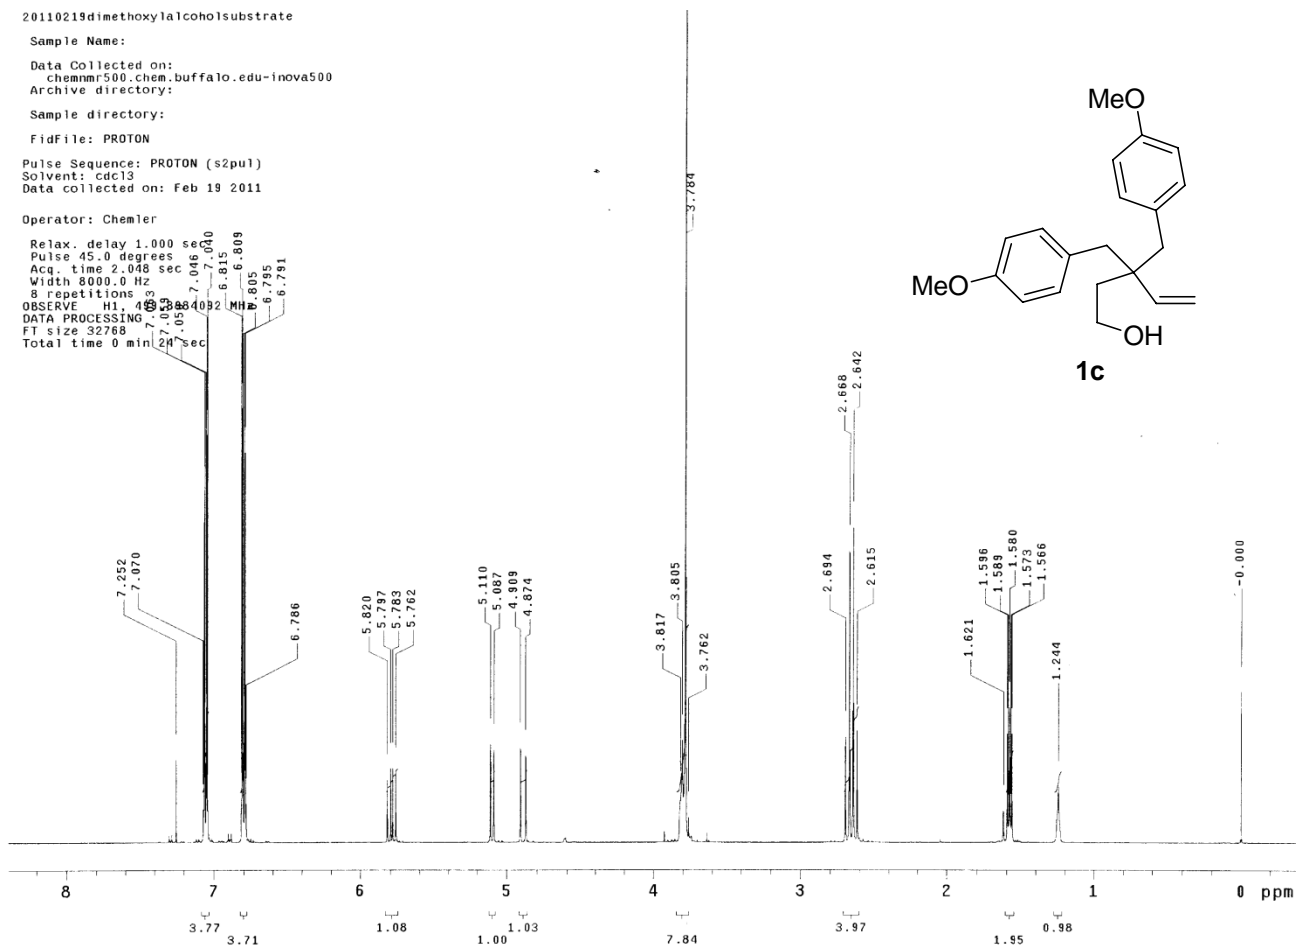

20110219dimethoxyalcoholsubstrateC13

Sample Name:  
 Data Collected on:  
 foessy.chem.buffalo.edu-mercury300  
 Archive directory:  
 Sample directory:  
 FidFile: CARBON

Pulse Sequence: CARBON (s2pul)  
 Solvent: cdcl3  
 Data collected on: Feb 19 2011

Temp. 25.0 C / 298.1 K  
 Operator: Chemler  
 Relax. delay 1.000 sec  
 Pulse 45.0 degrees  
 Acq. time 0.868 sec  
 Width 18867.9 Hz  
 1024 repetitions  
 OBSERVE C13: 75.4536400 MHz  
 DECOUPLE H1: 300.0754430 MHz  
 Power 38 dB  
 continuously on  
 WALTZ-16 modulated  
 DATA PROCESSING  
 Line broadening 0.5 Hz  
 FT size 32768  
 Total time 1 hr, 9 min

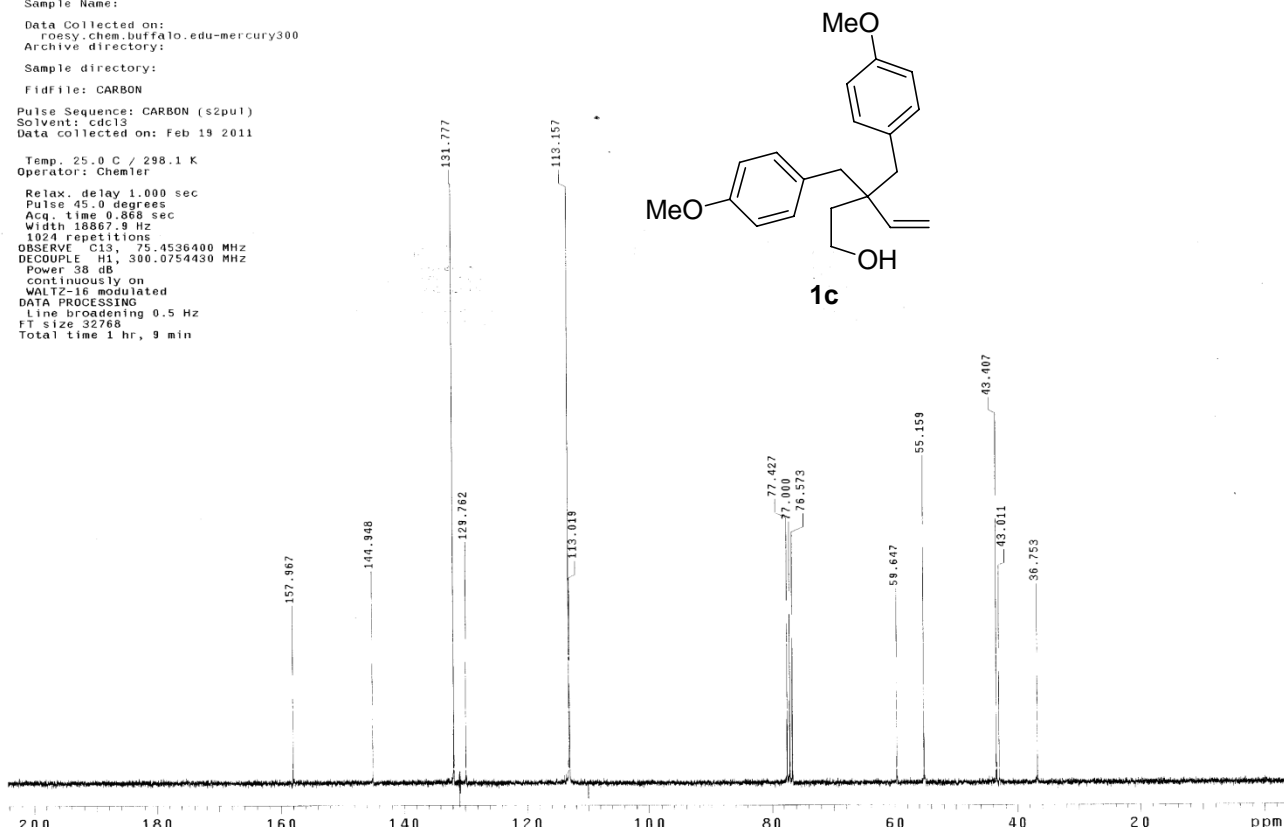

20110214dithiomethylactone

Sample Name:

Data Collected on:  
chemnmr500.chem.buffalo.edu-inova500  
Archive directory:

Sample directory:

FidFile: PROTON

Pulse Sequence: PROTON (s2pu1)  
Solvent: cdcl3  
Data collected on: Feb 14 2011Temp. 25.0 C / 298.1 K  
Operator: ChemlerRelax. delay 1.000 sec  
Pulse 45.0 degrees  
Acq. time 2.048 sec  
Width 8000.0 Hz  
8 repetitions  
OBSERVE H1, 499.8984044 MHz  
DATA PROCESSING  
FT size 32768  
Total time 0 min 24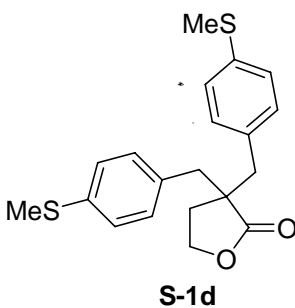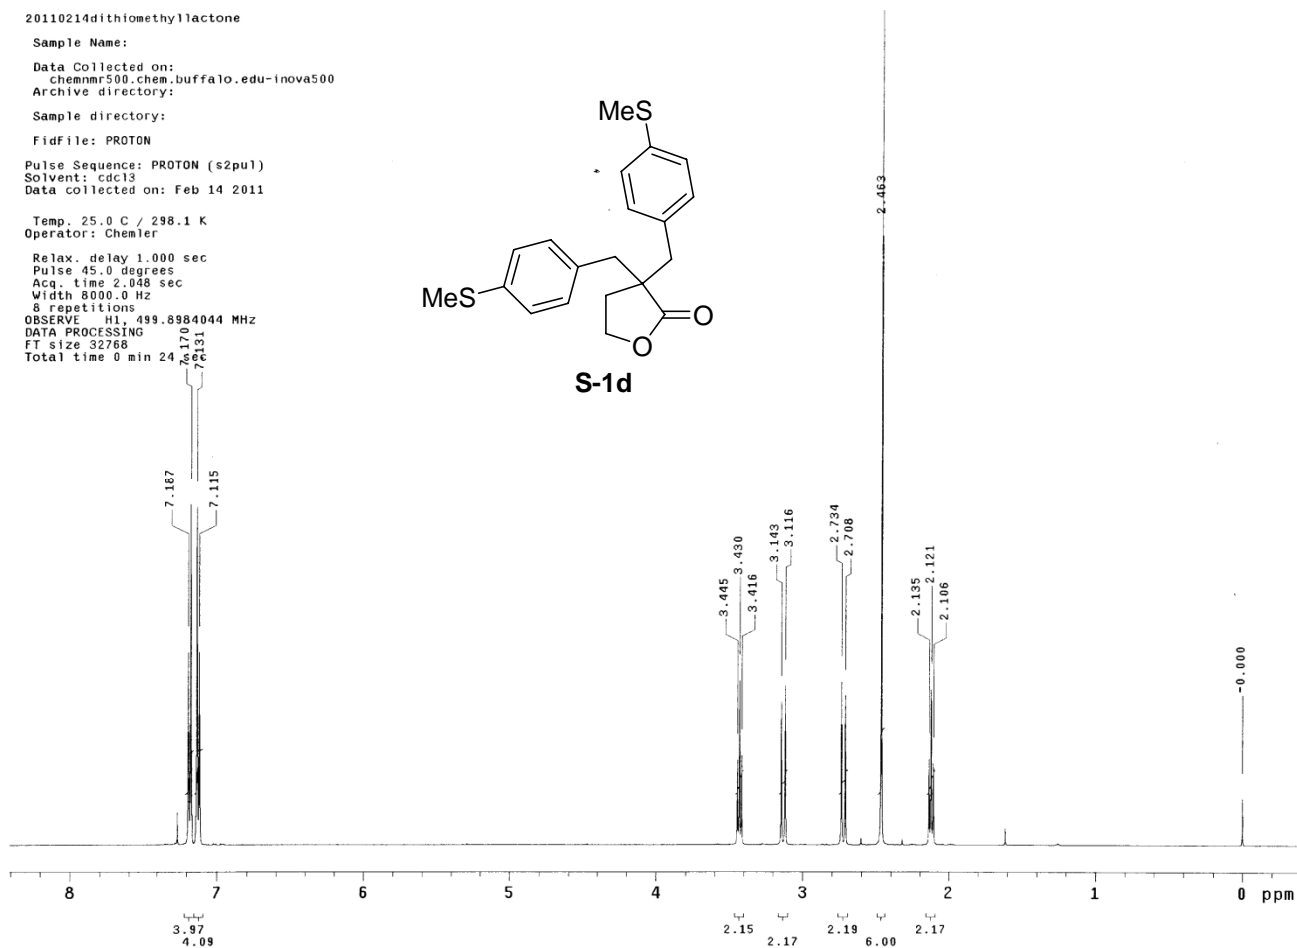

20110215dithiomethylactoneC13

Sample Name:

Data Collected on:  
roesy.chem.buffalo.edu-mercury300  
Archive directory:

Sample directory:

FidFile: CARBON

Pulse Sequence: CARBON (s2pu1)  
Solvent: cdcl3  
Data collected on: Feb 15 2011Temp. 25.0 C / 298.1 K  
Operator: ChemlerRelax. delay 1.000 sec  
Pulse 45.0 degrees  
Acq. time 0.868 sec  
Width 18867.9 Hz  
832 repetitions  
OBSERVE C13, 75.4536423 MHz  
DECUPLE H1, 300.0754430 MHz  
Power 38 dB  
continuously on  
WALTZ-16 modulated  
DATA PROCESSING  
Line broadening 0.5 Hz  
FT size 32768  
Total time 34 min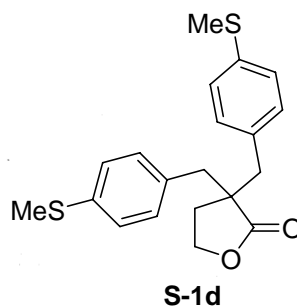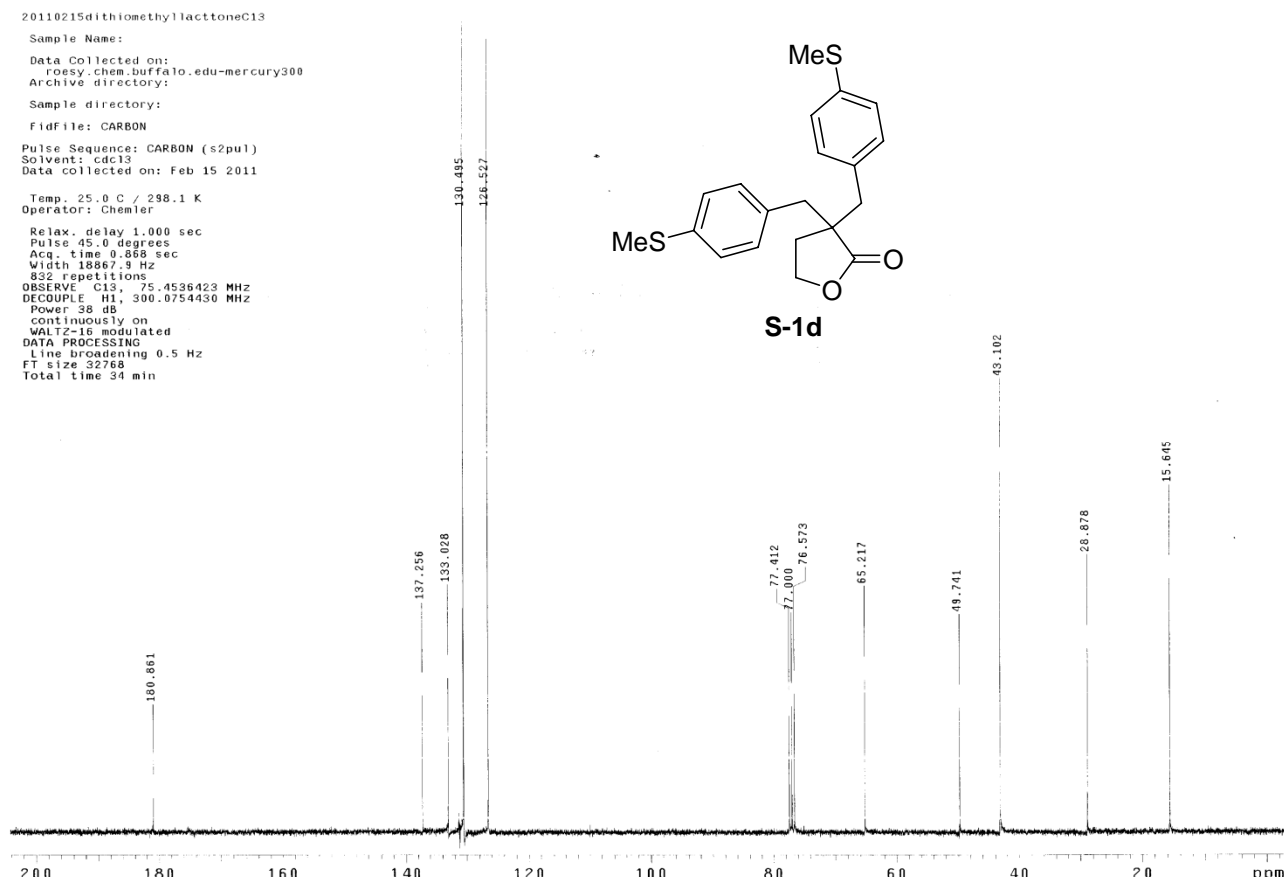

20110308dithiomethylalcoholsubstrate  
 Sample Name:  
 Data Collected on:  
 chemmr500.chem.buffalo.edu-inova500  
 Archive directory:  
 Sample directory:  
 Fidfile: PROTON  
 Pulse Sequence: PROTON (s2pu1)  
 Solvent: cdcl3  
 Data collected on: Mar 11 2011  
 Temp. 24.0 C / 297.1 K  
 Operator: Chemler  
 Relax. delay 1.000 sec  
 Pulse 45.0 degrees  
 Acq. time 2.048 sec  
 Width 8000.0 Hz  
 8 repetitions  
 OBSERVE H1, 499.8981078 MHz  
 DATA PROCESSING  
 FT size 32768  
 Total time 0 min 24 sec

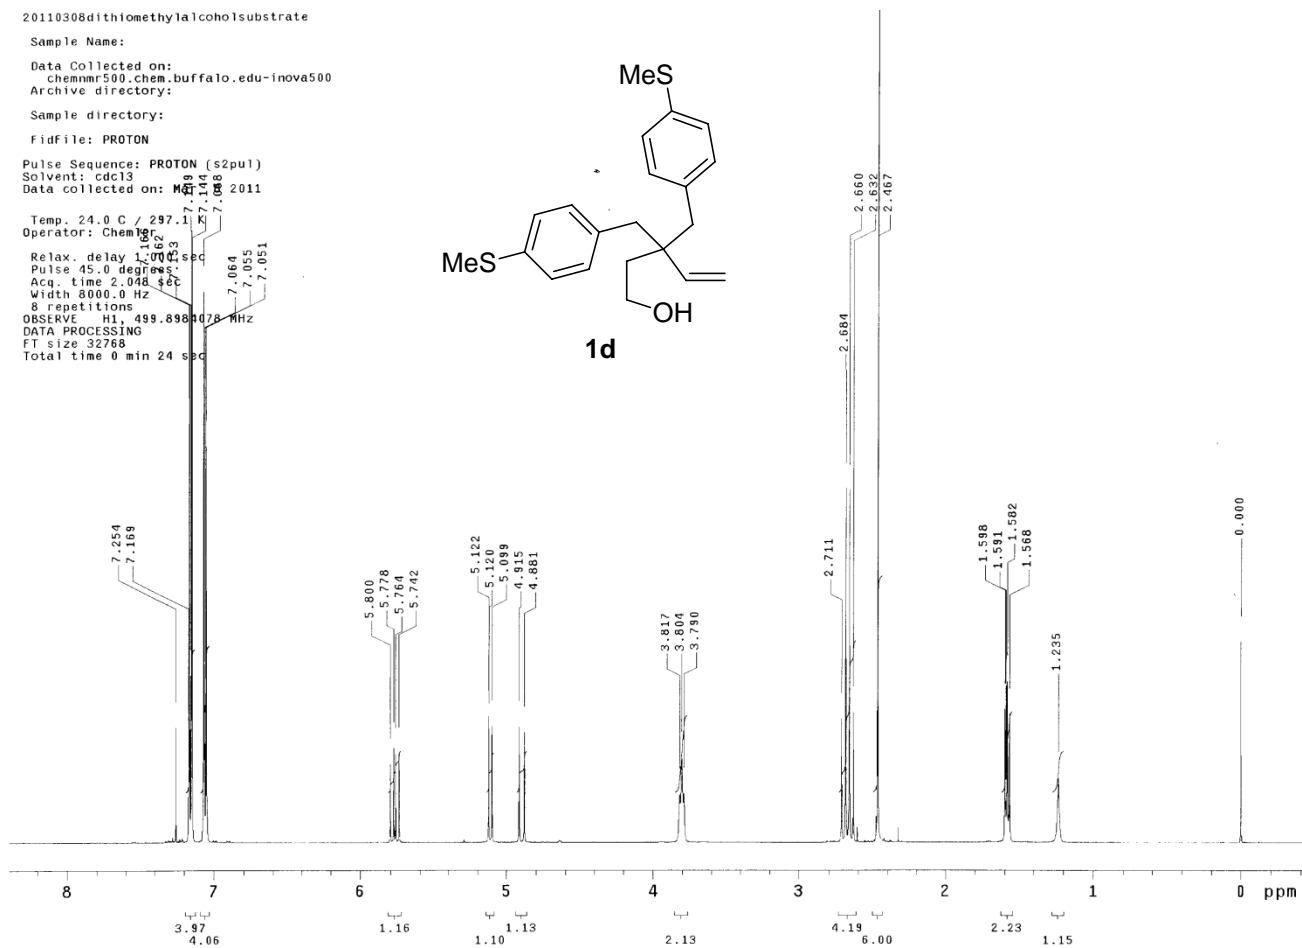

20110221dithiomethylalcoholsubstrateC13  
 Sample Name:  
 Data Collected on:  
 roesy.chem.buffalo.edu-mercury300  
 Archive directory:  
 Sample directory:  
 Fidfile: CARBON  
 Pulse Sequence: CARBON (s2pu1)  
 Solvent: cdcl3  
 Data collected on: Feb 21 2011  
 Temp. 25.0 C / 298.1 K  
 Operator: Chemler  
 Relax. delay 1.000 sec  
 Pulse 45.0 degrees  
 Acq. time 0.868 sec  
 Width 18867.9 Hz  
 1728 repetitions  
 OBSERVE C13, 75.4536412 MHz  
 DECOUPLE H1, 300.0754430 MHz  
 Power 38 dB  
 Continuously on  
 WALTZ-16 modulated  
 DATA PROCESSING  
 Line broadening 0.5 Hz  
 FT size 32768  
 Total time 1 hr, 9 min

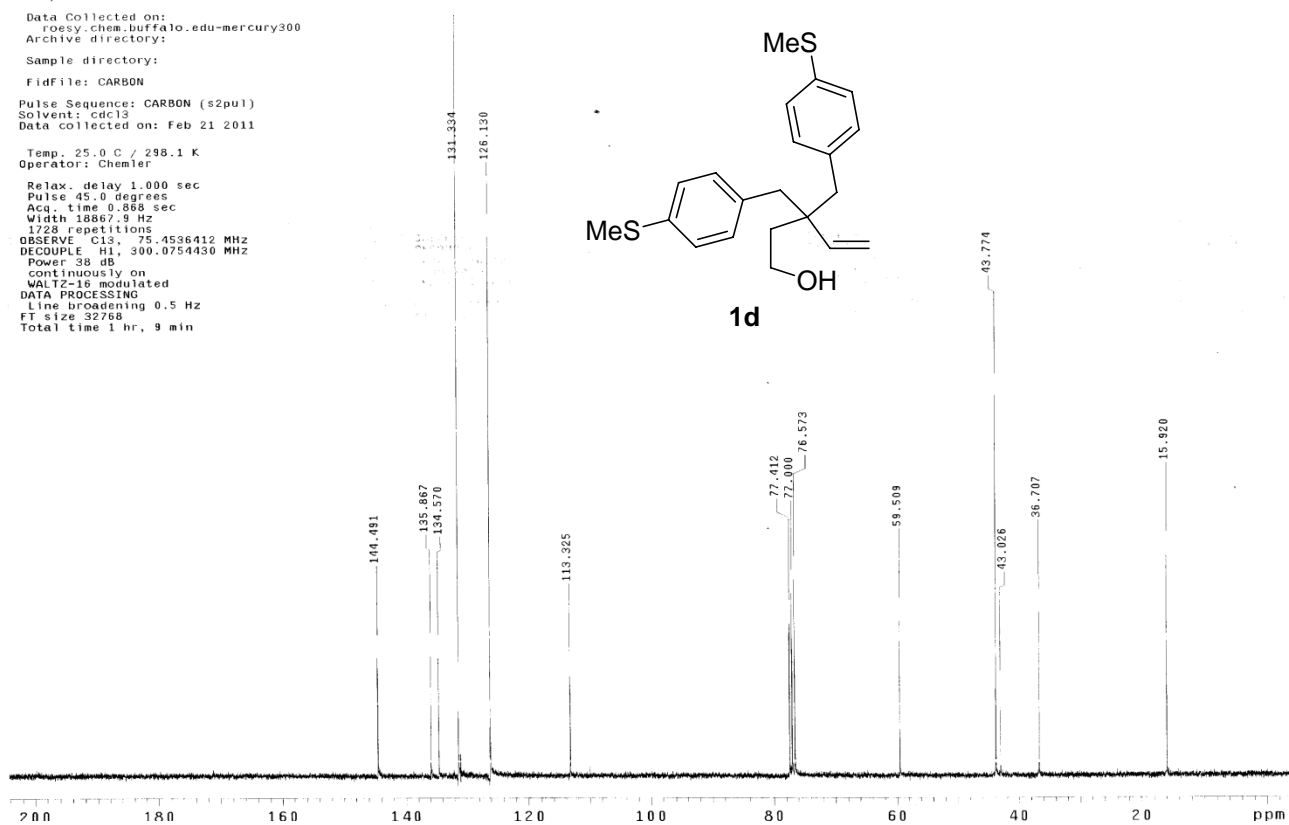

20110613dibromolactone

Sample Name:

Data Collected on:  
Chemmr500.chem.buffalo.edu-inova500

Archive directory:

Sample directory:

FidFile: PROTON

Pulse Sequence: PROTON (s2pu1)  
Solvent: cdcl3  
Data collected on: Jun 13 2011Temp. 25.0 C / 298.1 K  
Operator: ChemlerRelax. delay 1.000 sec  
Pulse 45.0 degrees  
Acq. time 2.048 sec  
Width 8000.0 Hz  
8 repetitions  
OBSERVE H1, 499.898444 MHz  
DATA PROCESSING  
FT size 32768  
Total time 0 min 24 sec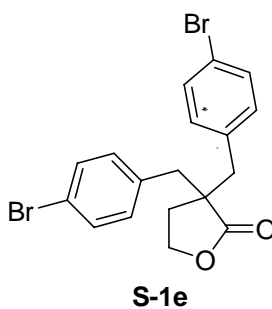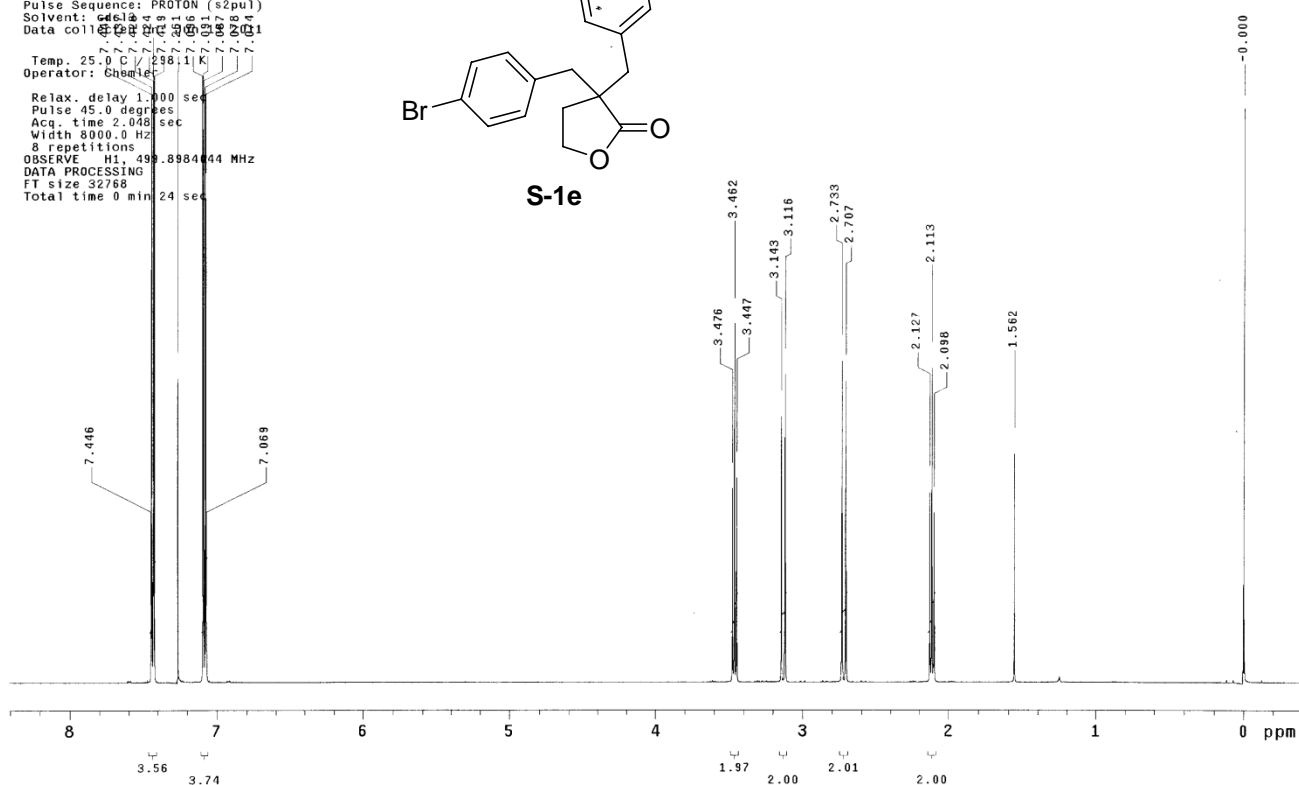

20110613dibromolactoneC13

Sample Name:

Data Collected on:  
roesy.chem.buffalo.edu-mercury300

Archive directory:

Sample directory:

FidFile: CARBON

Pulse Sequence: CARBON (s2pu1)  
Solvent: cdcl3  
Data collected on: Jun 13 2011Temp. 25.0 C / 298.1 K  
Operator: ChemlerRelax. delay 1.000 sec  
Pulse 45.0 degrees  
Acq. time 0.868 sec  
Width 18867.9 Hz  
3776 repetitions  
OBSERVE C13, 75.4536389 MHz  
DECOUPLE H1, 306.0754430 MHz  
Power 38 dB  
continuously on  
WALTZ-16 modulated  
DATA PROCESSING  
Line broadening 0.5 Hz  
FT size 32768  
Total time 2 hr, 18 min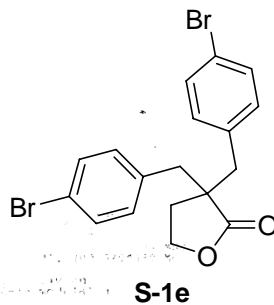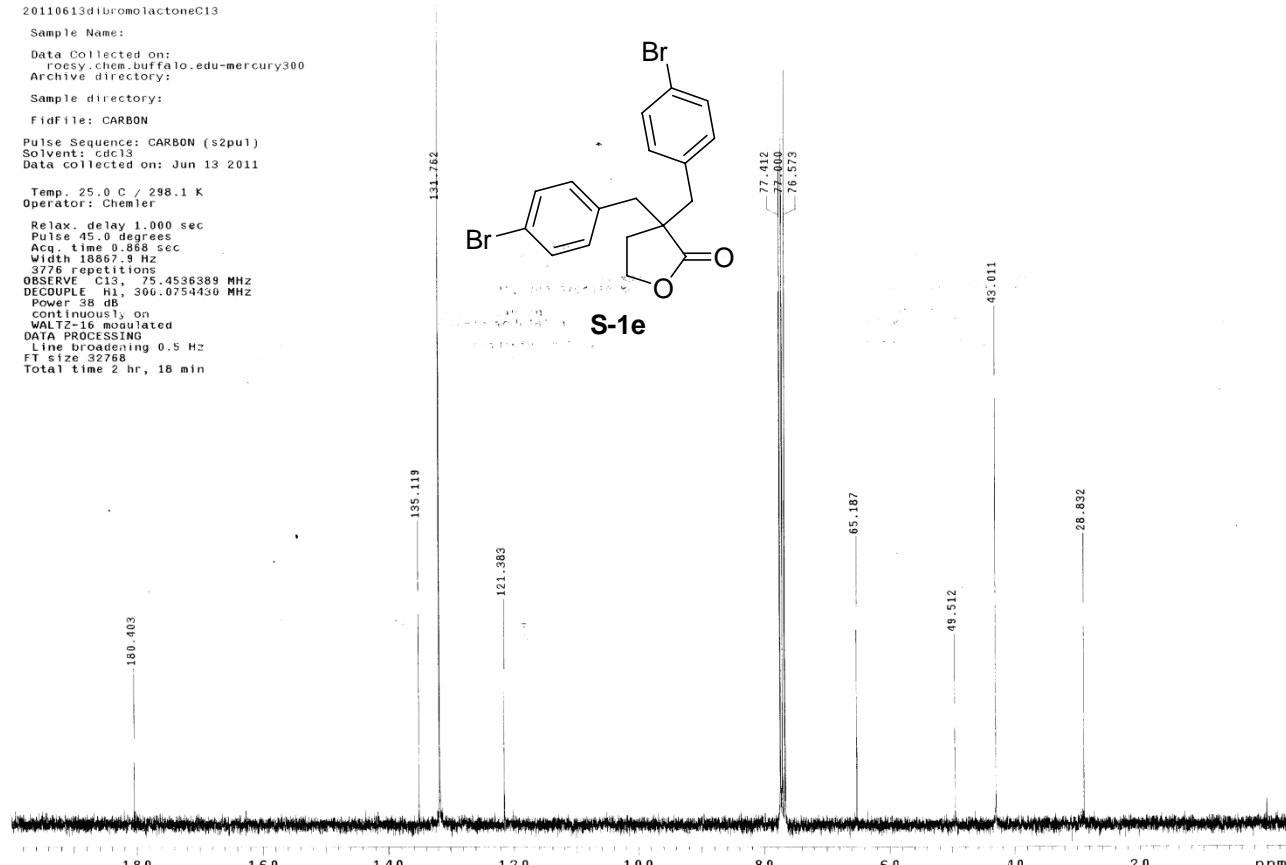

20110623dibromoalcoholsubstrate

Sample Name:

Data Collected on:  
chemmr500.chem.buffalo.edu-inova500  
Archive directory:

Sample directory:

Fidfile: PROTON

Pulse Sequence: PROTON (s2pu1)  
Solvent: cdcl3  
Data collected on: Jun 23 2011

Temp. 25.0 C / 298.1 K  
Operator: Chemler

Relax. delay 1.000 sec

Pulse 45.0 degrees

Acq. time 2.048 sec

Width 8000.0 Hz

8 repetitions

OBSERVE H1, 499.8984053 MHz

DATA PROCESSING

FT size 32768

Total time 0 min 24 sec

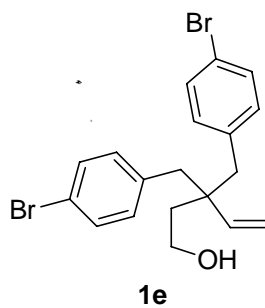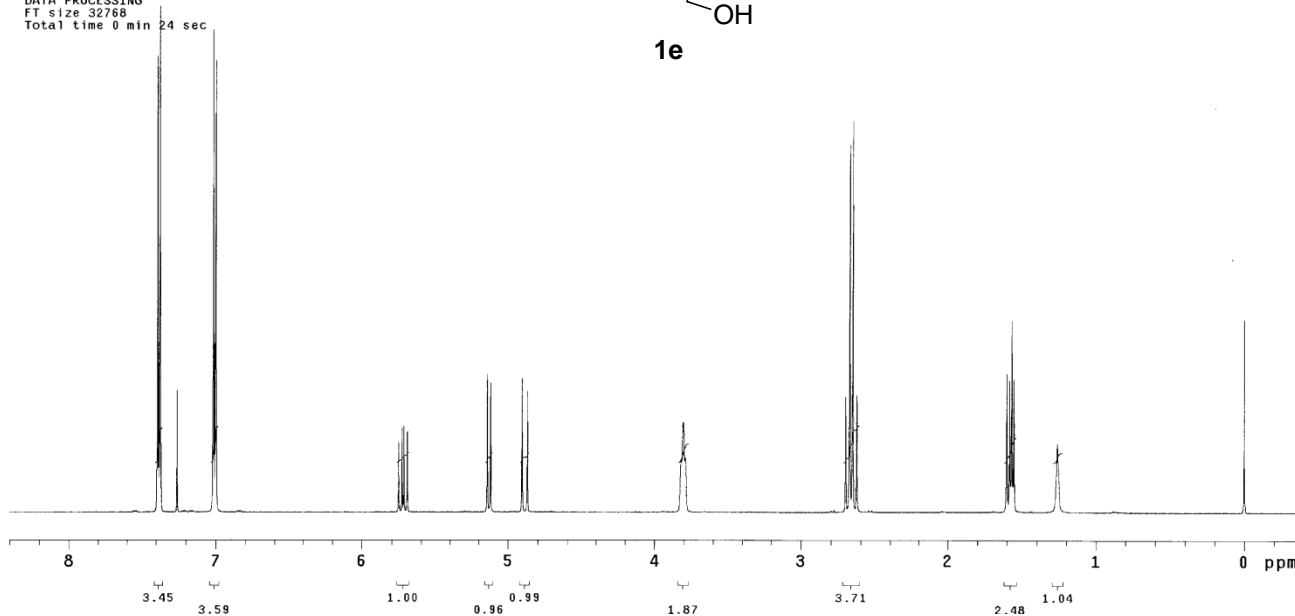

20110621dibromoalcoholsubstrateC13

Sample Name:

Data Collected on:  
roesy.chem.buffalo.edu-mercury300  
Archive directory:

Sample directory:

Fidfile: CARBON

Pulse Sequence: CARBON (s2pu1)  
Solvent: cdcl3  
Data collected on: Jun 21 2011

Temp. 25.0 C / 298.1 K

Operator: Chemler

Relax. delay 1.000 sec

Pulse 45.0 degrees

Acq. time 0.868 sec

Width 18867.9 Hz

3552 repetitions

OBSERVE C13, 75.4536400 MHz

DECOUPLE H1, 300.0754430 MHz

Power 38 dB

Continuously on

WALTZ-16 modulated

DATA PROCESSING

Line broadening 0.5 Hz

FT size 32768

Total time 2 hr, 18 min

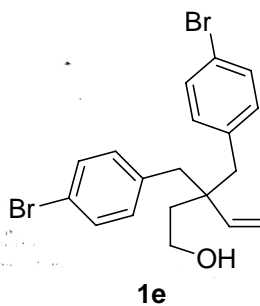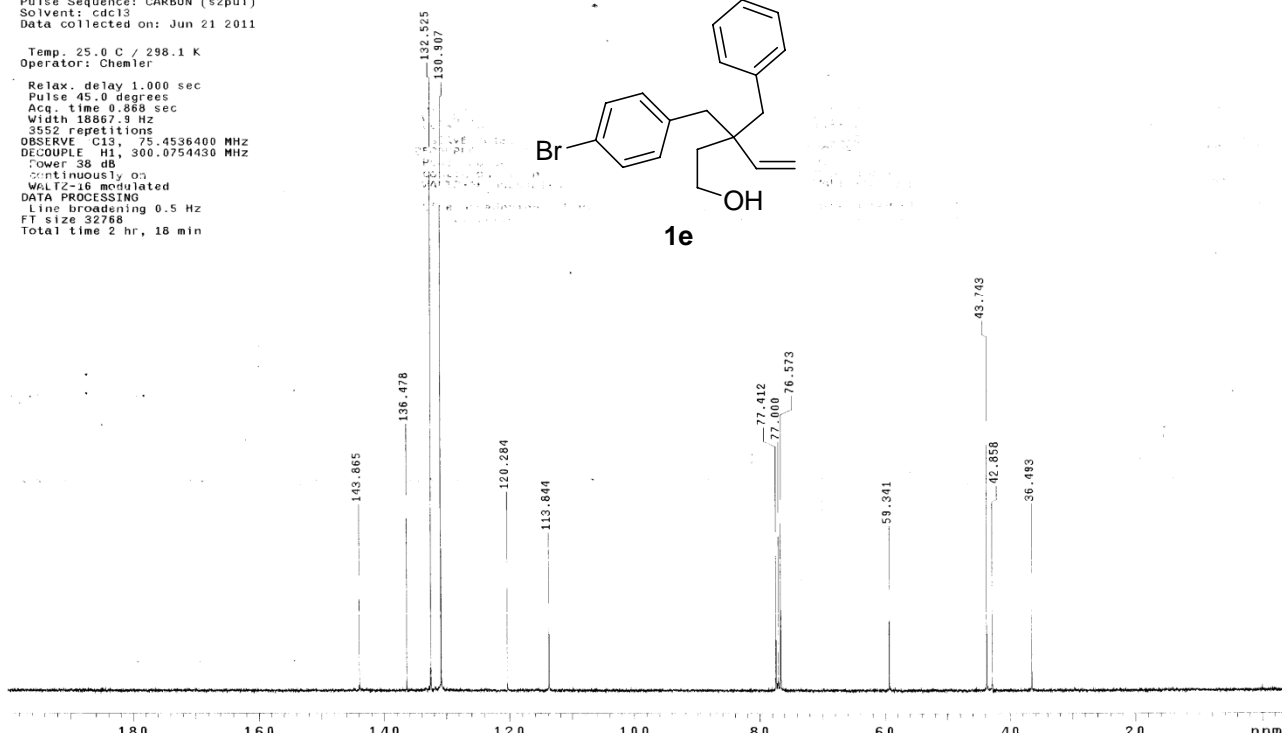

20110610dichlorolactone

Sample Name:  
Data Collected on:  
Chemmr500.chem.buffalo.edu-inova500  
Archive directory:  
Sample directory:  
FidFile: PROTON

Pulse Sequence: PROTON (s2pu1)  
Solvent: cdc13  
Data collected on: Jun 10 2011  
Temp. 25.0 C / 298.1 K  
Operator: Chemler  
Relax. delay 1.000 sec  
Pulse 45.0 degrees  
Acq. time 0.868 sec  
Width 8000.000 Hz  
8 repetitions  
OBSERVE H1, 499.8981048 MHz  
DATA PROCESSING  
FT size 32768  
Total time 0 min 24 sec

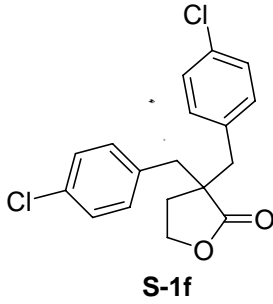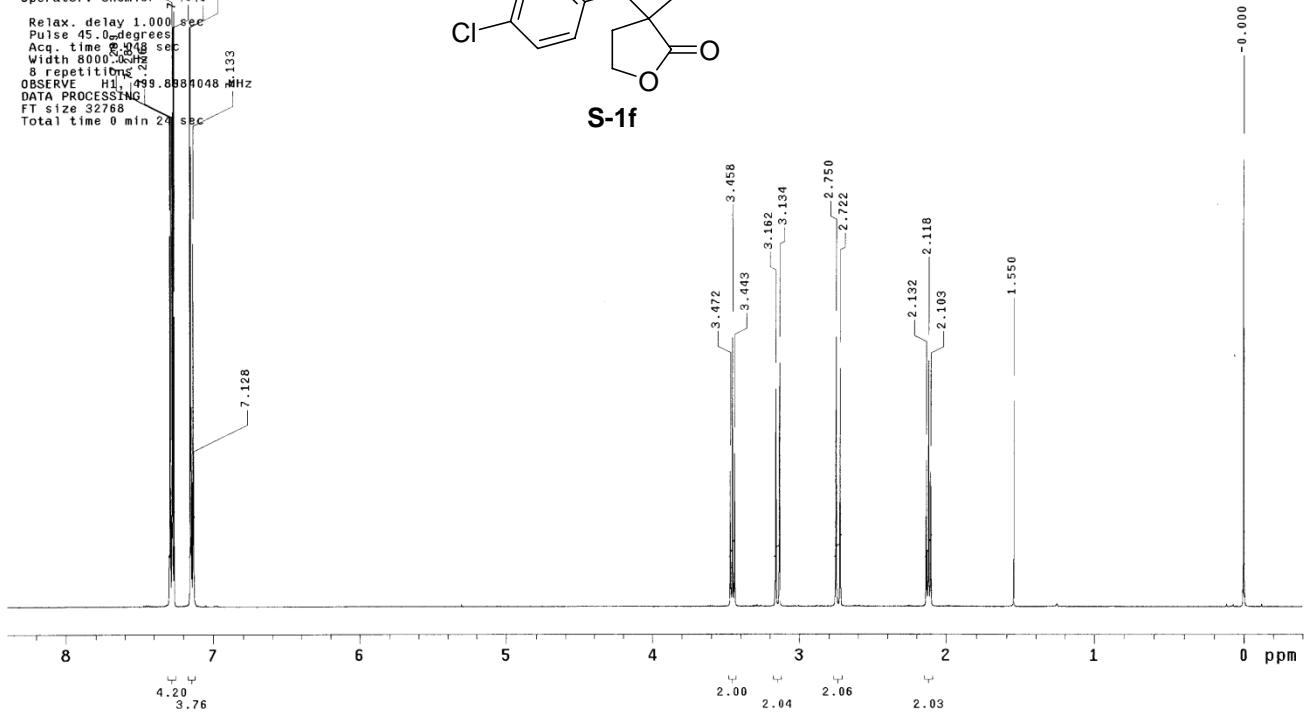

20110610dichlorolactoneC13

Sample Name:  
Data Collected on:  
roesy.chem.buffalo.edu-mercury300  
Archive directory:  
Sample directory:  
FidFile: CARBON

Pulse Sequence: CARBON (s2pu1)  
Solvent: cdc13  
Data collected on: Jun 10 2011  
Temp. 25.0 C / 298.1 K  
Operator: Chemler  
Relax. delay 1.000 sec  
Pulse 45.0 degrees  
Acq. time 0.868 sec  
Width 18867.9 Hz  
2048 repetitions  
OBSERVE C13, 75.4536389 MHz  
DECOUPLE H1, 300.0754430 MHz  
Power 38 dB  
continuously on  
WA-TZ-16 modulated  
DATA PROCESSING  
Line broadening 0.5 Hz  
FT size 32768  
Total time 1 hr, 9 min

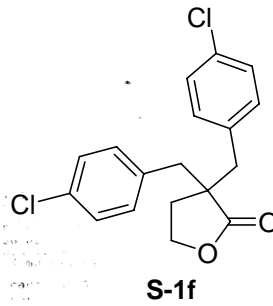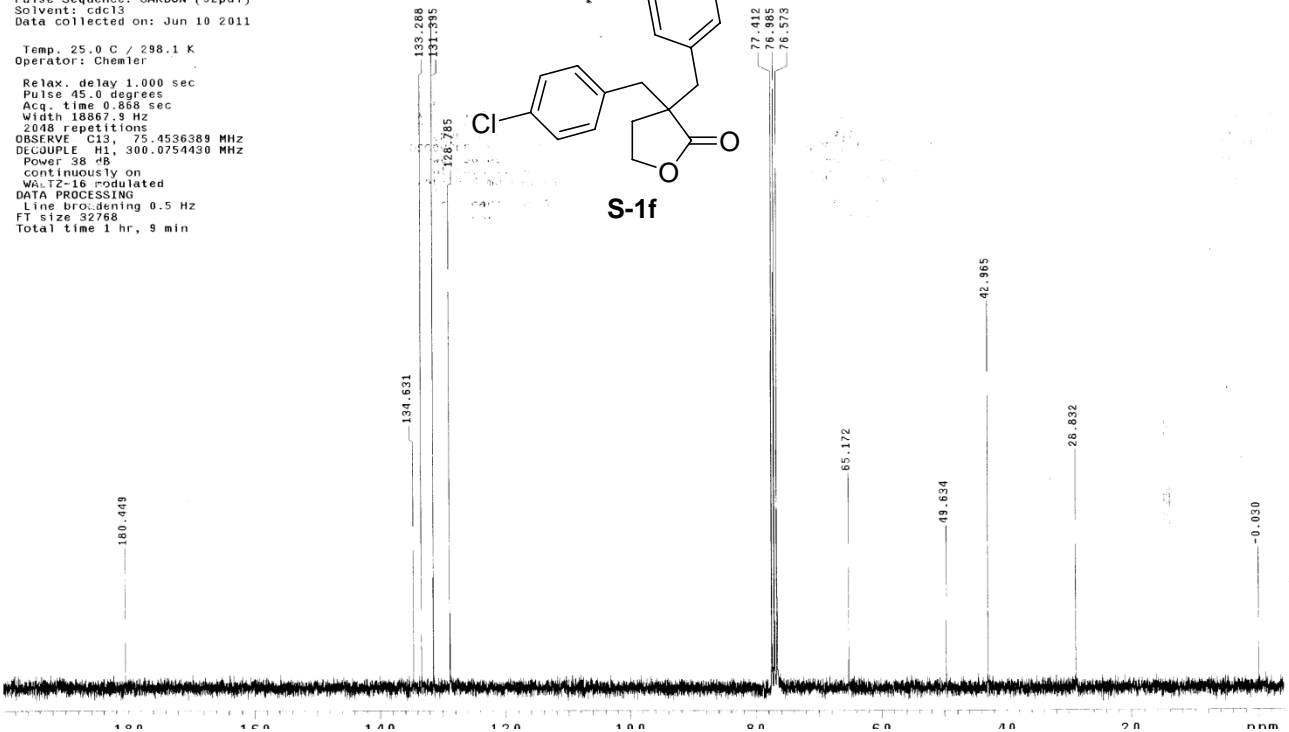

20110624dichloroalcoholsubstrate

Sample Name:

Data Collected on:  
chemmr500.chem.buffalo.edu-inova500

Archive directory:

Sample directory:

FidFile: PROTON

Pulse Sequence: PROTON (s2pu1)  
 Solvent: cdcl3  
 Data collected: 20110624  
 Temp. 25.0 C / 298.1 K  
 Operator: Chemler  
 Relax. delay 1.000 sec  
 Pulse 45.0 degrees  
 Acq. time 2.048 sec  
 Width 8000.0 Hz  
 8 repetitions  
 OBSERVE: H1, 499.8984053 MHz  
 DATA PROCESSING  
 FT size 32768  
 Total time 0 min 24 sec

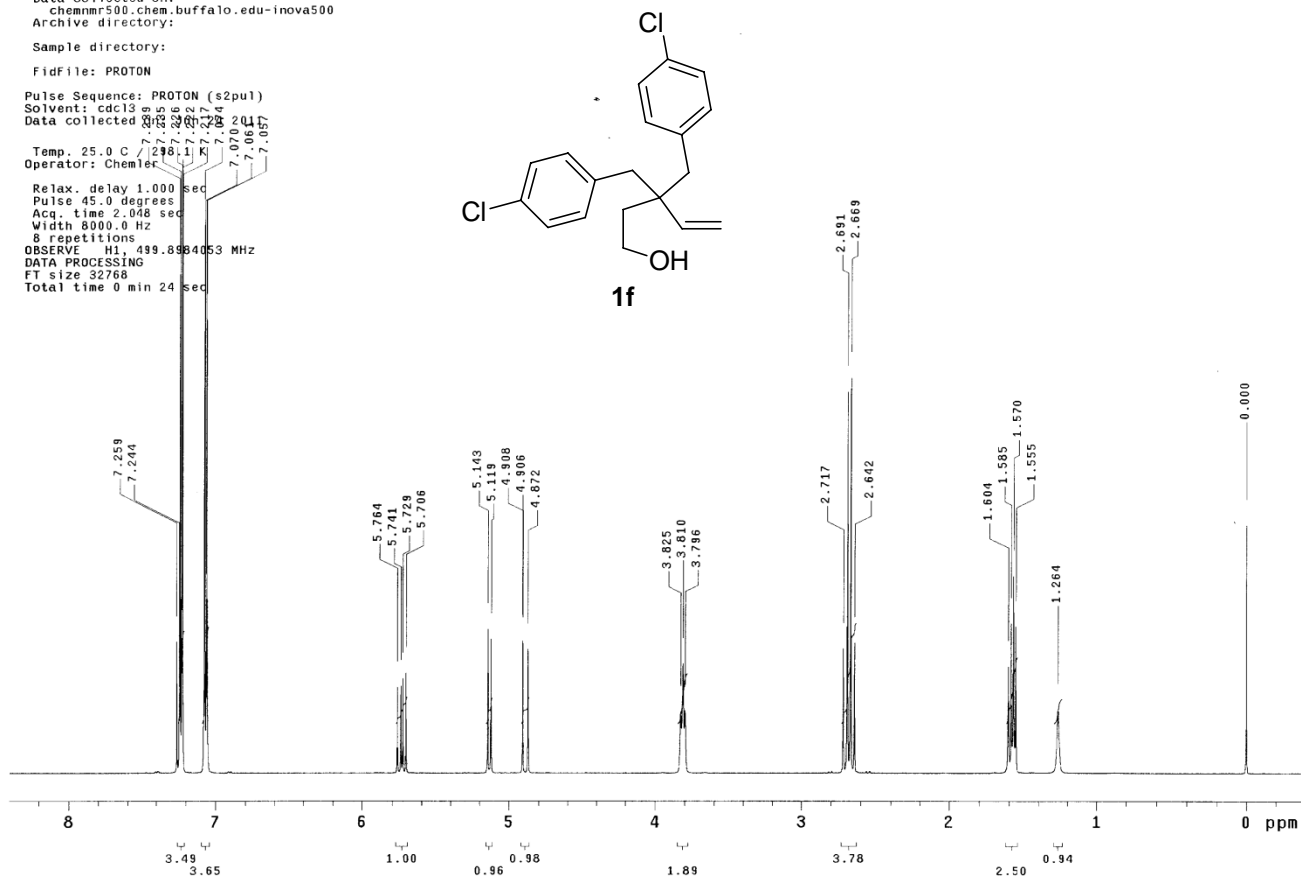

20110614dichloroalcoholsubstrateC13

Sample Name:

Data Collected on:  
roesy.chem.buffalo.edu-mercury300

Archive directory:

Sample directory:

FidFile: CARBON

Pulse Sequence: CARBON (s2pu1)  
 Solvent: cdcl3  
 Data collected on: Jun 14 2011  
 Temp. 25.0 C / 298.1 K  
 Operator: Chemler  
 Relax. delay 1.000 sec  
 Pulse 45.0 degrees  
 Acq. time 0.868 sec  
 Width 18867.9 Hz  
 4096 repetitions  
 OBSERVE: C13, 75.4536400 MHz  
 DECOUPLE: H1, 300.0754430 MHz  
 Power: 38 dB  
 Continuously on  
 WALTZ-16 modulated  
 DATA PROCESSING  
 Line broadening 0.5 Hz  
 FT size 32768  
 Total time 2 hr, 18 min

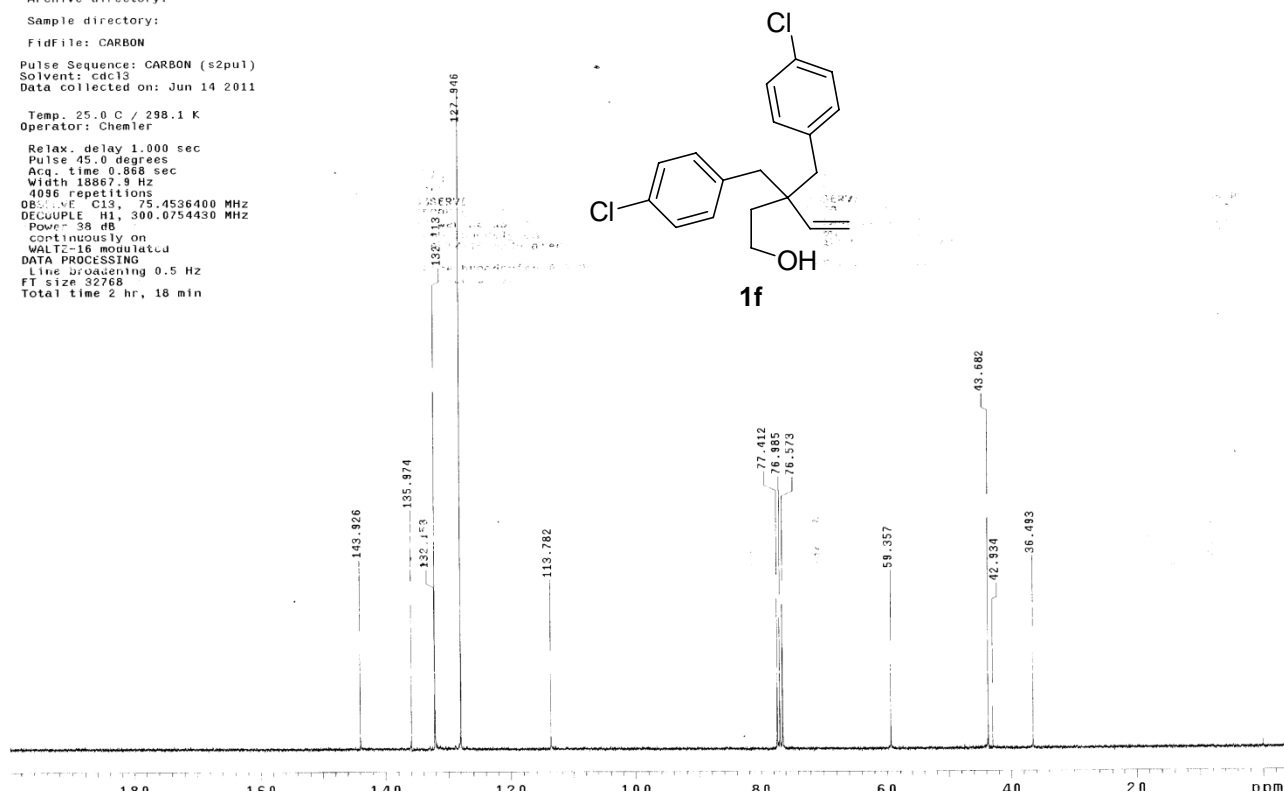

20110214di3methoxylactone

Sample Name:

Data Collected on:  
chemnmr500.chem.buffalo.edu-inova500  
Archive directory:

Sample directory:

FidFile: 20110214di3methoxylactone

Pulse Sequence: PROTON (s2pu1)  
Solvent: cdc13  
Data collected on: Feb 14 2011Temp. 25.0 C / 298.1 K  
Operator: ChemlerRelax. delay 1.000 sec  
Pulse 45.0 degrees  
Acq. time 2.048 sec  
Width 8000.0 Hz  
8 repetitionsOBSERVE H1, 499.8984053 MHz  
DATA PROCESSING  
FT size 32768  
Total time 0 min 24 sec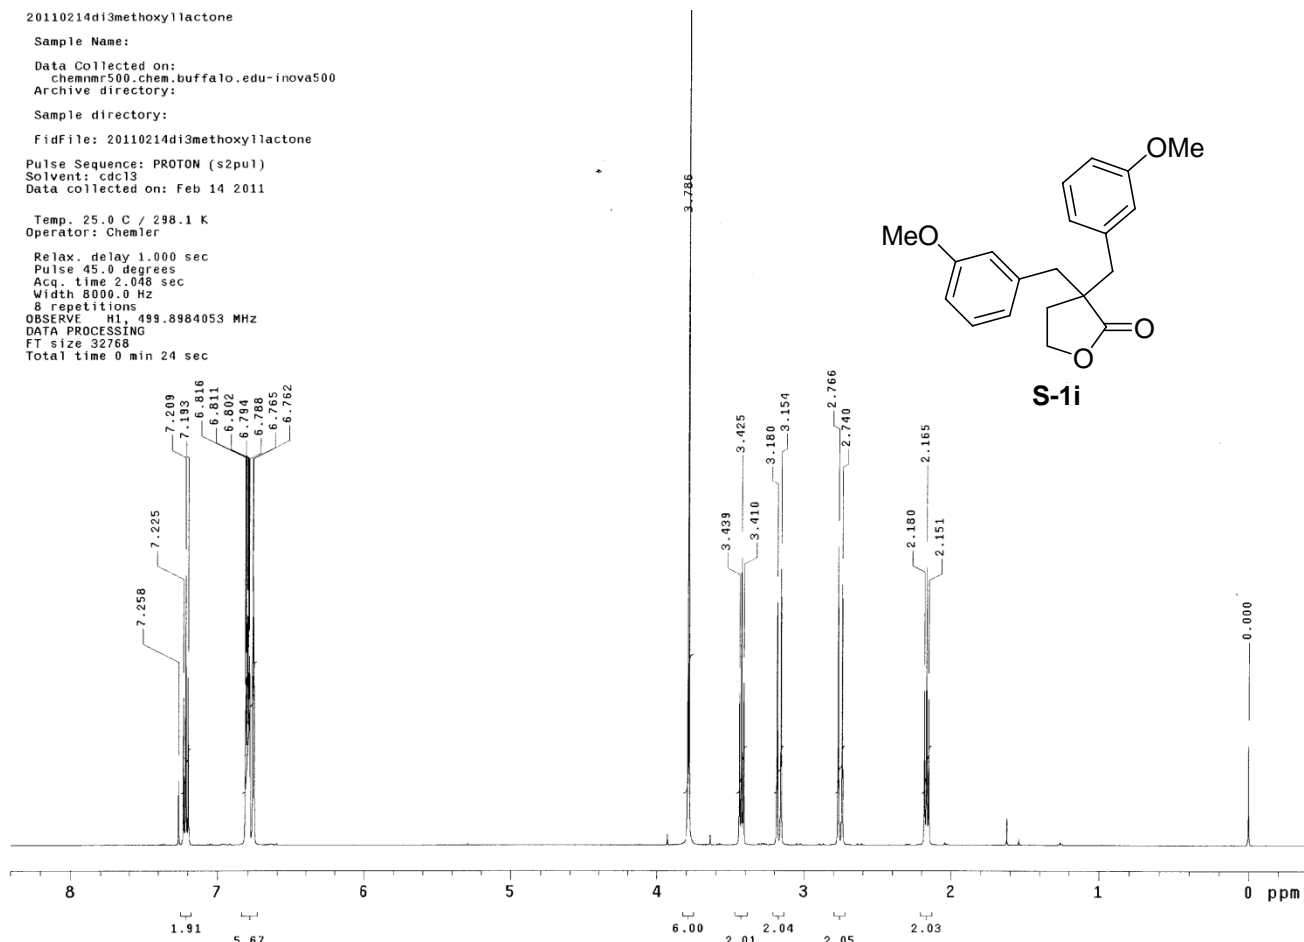

20110215di3methoxylactoneC13

Sample Name:

Data Collected on:  
foesy.chem.buffalo.edu-mercury300  
Archive directory:

Sample directory:

FidFile: CARBON

Pulse Sequence: CARBON (s2pu1)  
Solvent: cdc13  
Data collected on: Feb 15 2011Temp. 25.0 C / 298.1 K  
Operator: ChemlerRelax. delay 1.000 sec  
Pulse 45.0 degrees  
Acq. time 0.868 sec  
Width 18867.9 Hz  
896 repetitionsOBSERVE C13, 75.4536400 MHz  
DECOUPLE H1, 300.0754430 MHz  
Power 38 dB  
continuously on  
WALTZ-16 modulated  
DATA PROCESSING  
Line broadening 0.5 Hz  
FT size 32768  
Total time 34 min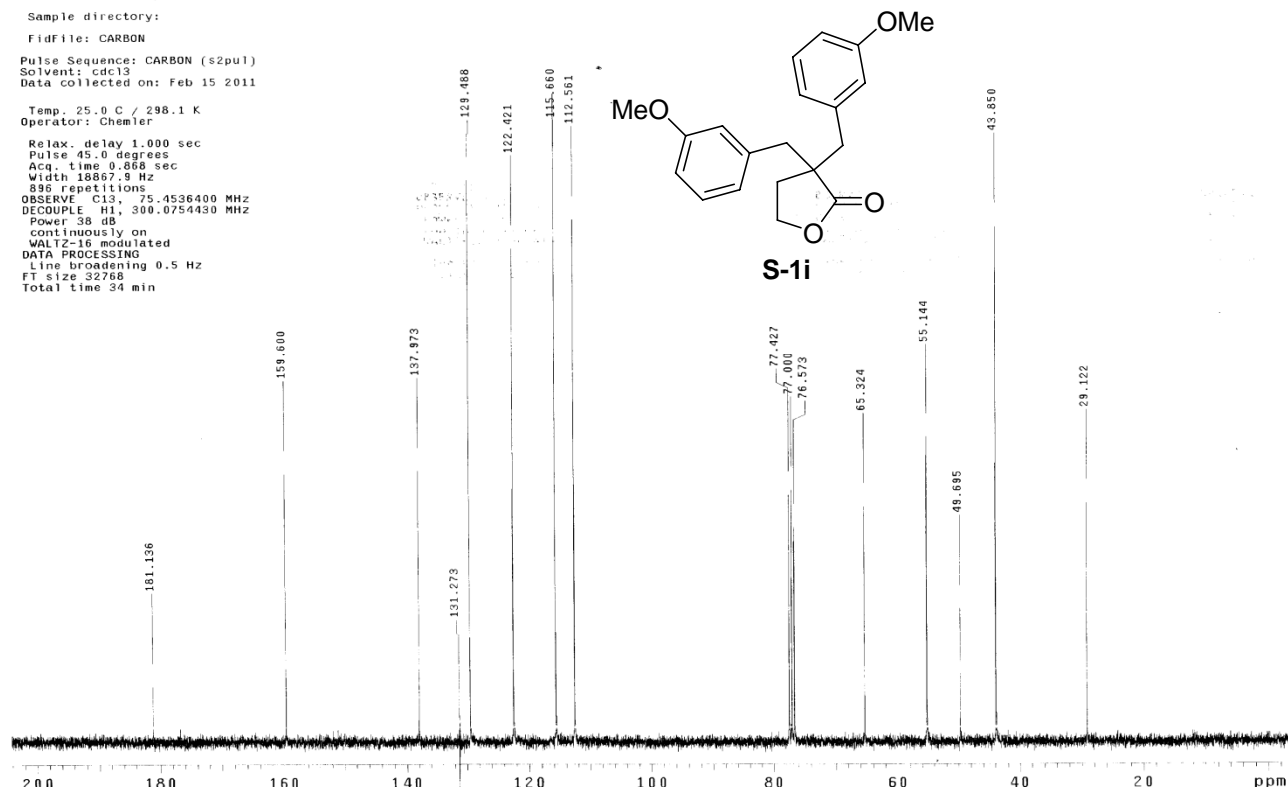



20110219di3methoxyalcoholsubstrateH

Sample Name:

Data Collected on:  
chemmr500.chem.buffalo.edu-inova500  
Archive directory:

Sample directory:

FidFile: PROTON

Pulse Sequence: PROTON (s2pul)  
Solvent: cdcl3  
Data collected on: Feb 19 2011

Operator: Chemler

Relax. delay 1.000 sec  
Pulse 45.0 degrees  
Acq. time 2.048 sec  
Width 8000.0 Hz  
8 repetitions  
OBSERVE H1, 499.8984136 MHz  
DATA PROCESSING  
FT size 32768  
Total time 0 min 24 sec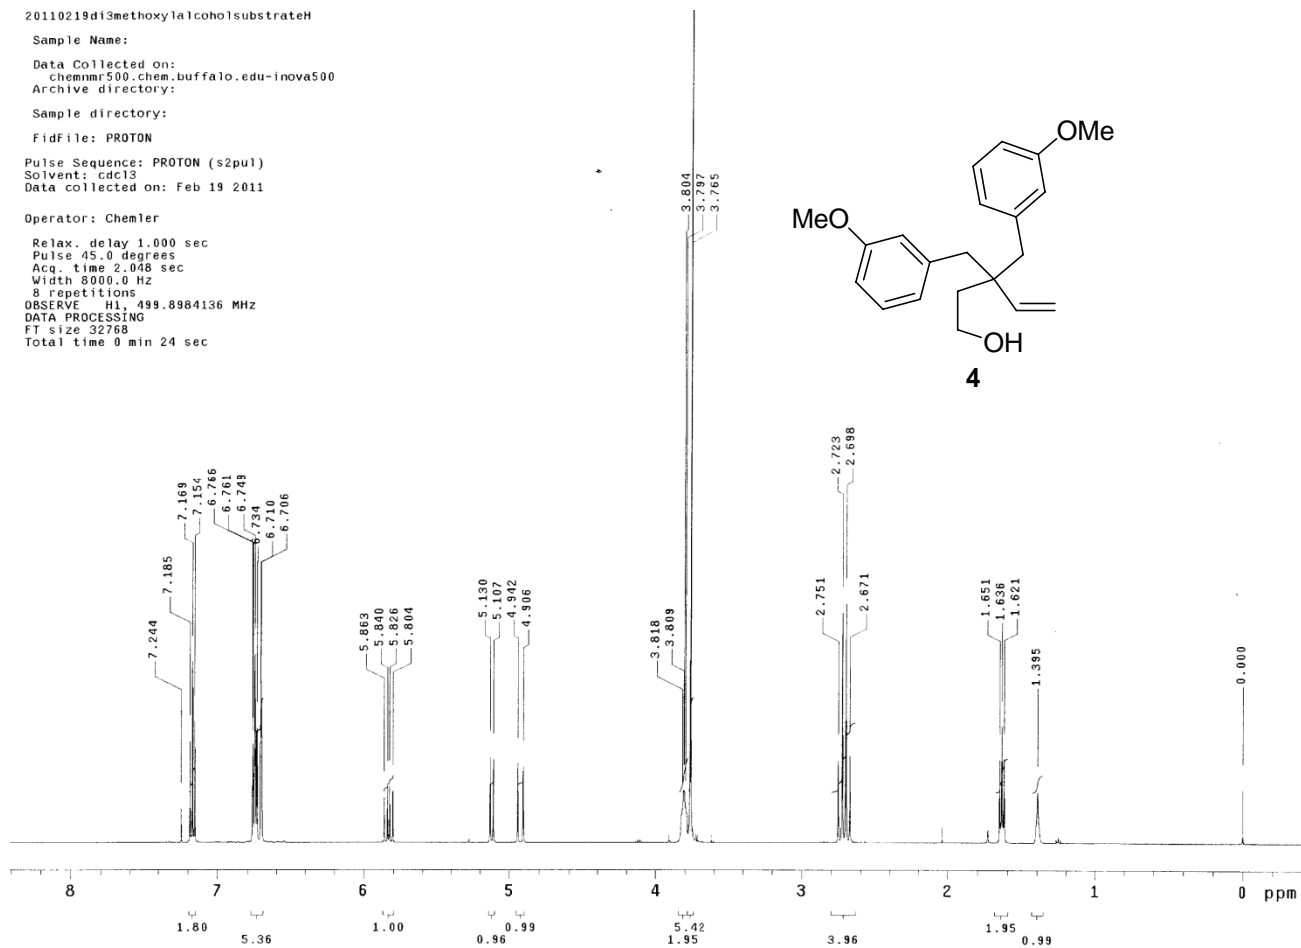

20110219di3methoxyalcoholsubstrate

Sample Name:

Data Collected on:  
roesy.chem.buffalo.edu-mercury300  
Archive directory:

Sample directory:

FidFile: CARBON

Pulse Sequence: CARBON (s2pul)  
Solvent: cdcl3  
Data collected on: Feb 19 2011Temp. 25.0 C / 298.1 K  
Operator: ChemlerRelax. delay 1.000 sec  
Pulse 45.0 degrees  
Acq. time 0.868 sec  
Width 18867.9 Hz  
2048 repetitions  
OBSERVE C13, 75.4538423 MHz  
DECOUPLE H1, 300.0754430 MHz  
Power 38 dB  
continuously on  
WALTZ-16 is modulated  
DATA PROCESSING  
Line broadening 0.5 Hz  
FT size 32768  
Total time 1 hr, 9 min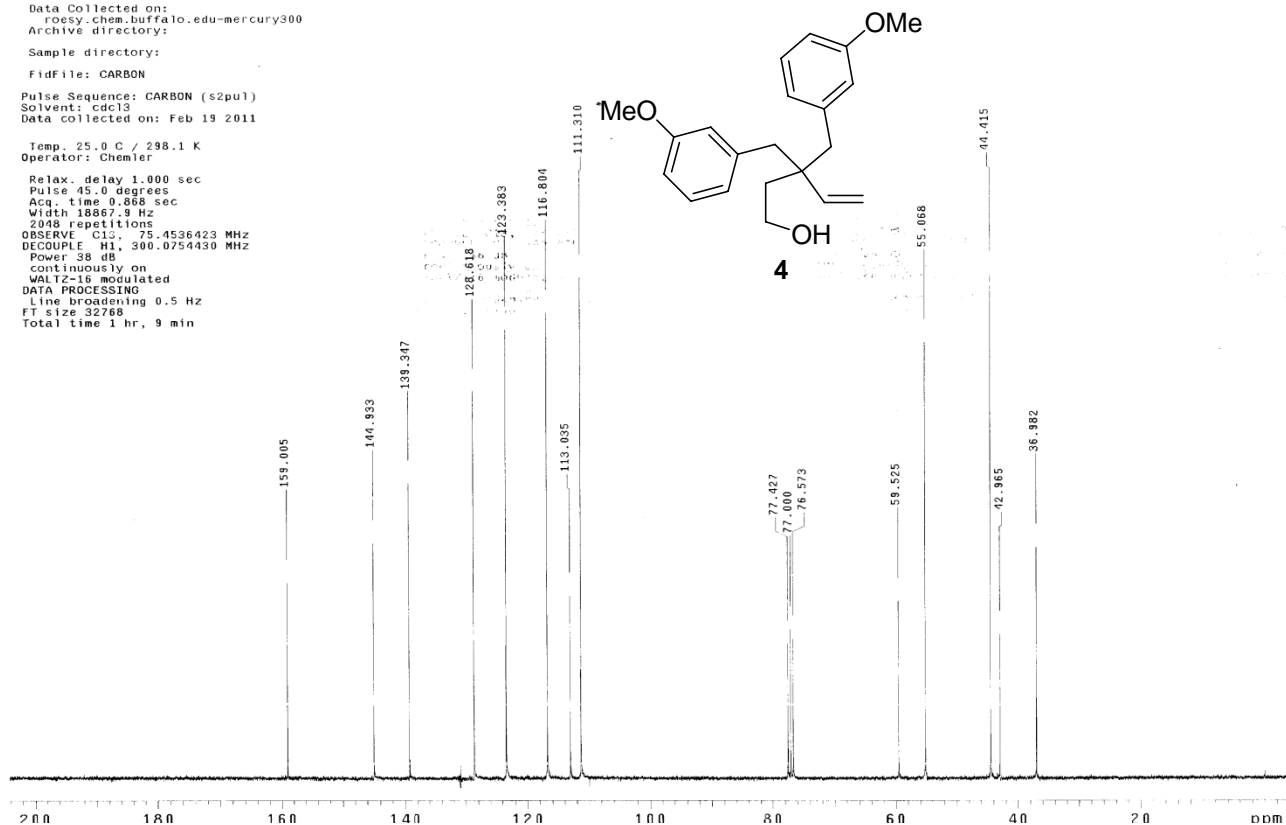

20110307diomethoxylactone

Sample Name:

Data Collected on:  
chemnmr500.chem.buffalo.edu-inova500  
Archive directory:

Sample directory:

FidFile: PROTON

Pulse Sequence: PROTON (s2pu1)  
Solvent: cdcl3  
Data collected on: Mar 7 2011Temp. 25.0 C / 298.1 K  
Operator: ChemlerRelax. delay 1.000 sec  
Pulse 45.0 degrees  
Acq. time 2.048 sec  
Width 8000.0 Hz8 repetitions  
OBSERVE H1, 499.8984063 MHZ  
DATA PROCESSING  
FT size 32768  
Total time 0 min 24 sec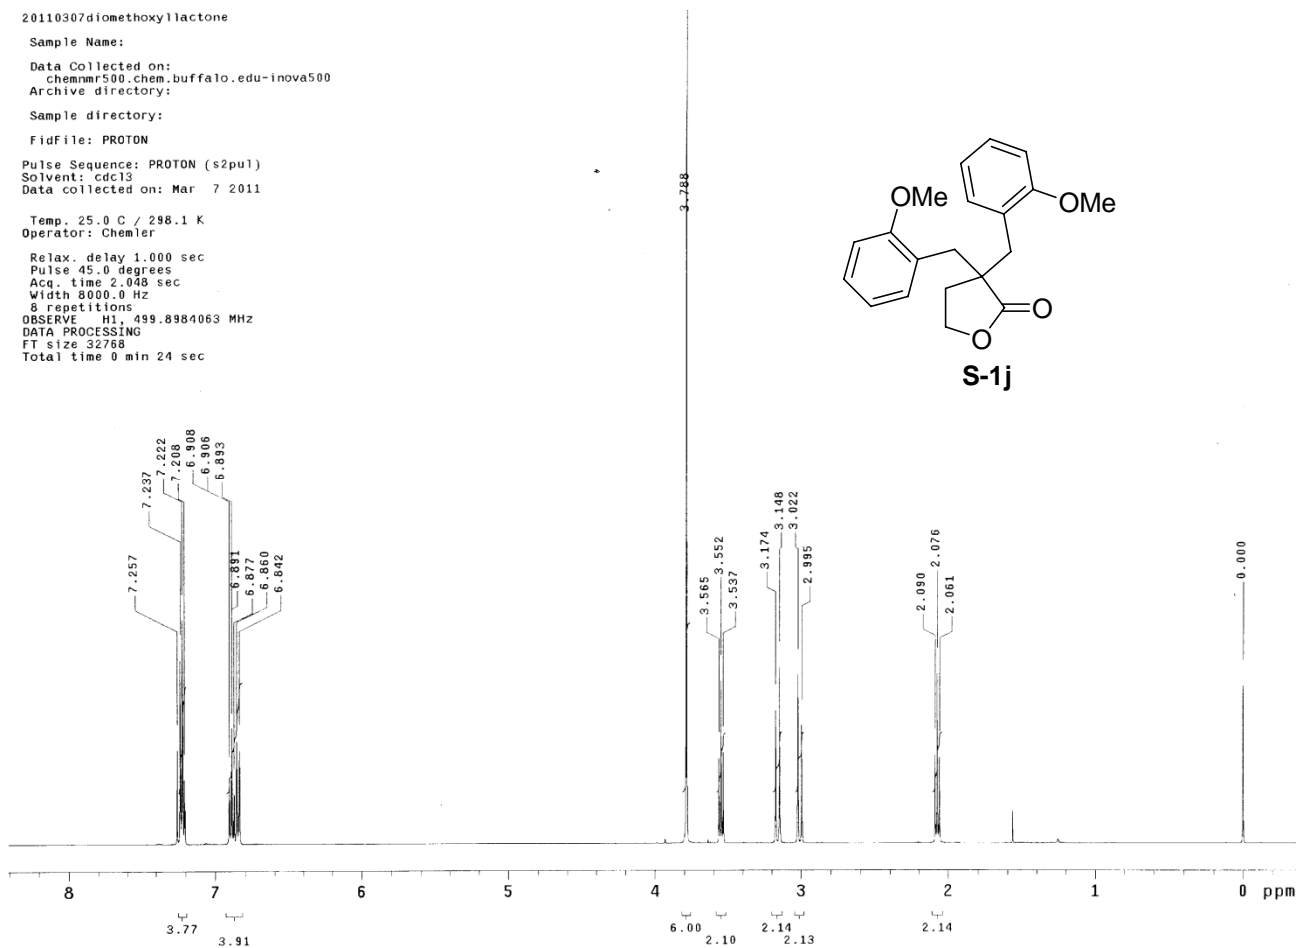

20110305diomethoxylactoneC13

Sample Name:

Data Collected on:  
roesy.chem.buffalo.edu-mercury300  
Archive directory:

Sample directory:

FidFile: CARBON

Pulse Sequence: CARBON (s2pu1)  
Solvent: cdcl3  
Data collected on: Mar 5 2011Temp. 25.0 C / 298.1 K  
Operator: ChemlerRelax. delay 1.000 sec  
Pulse 45.0 degrees  
Acq. time 0.868 sec  
Width 18867.9 Hz1728 repetitions  
OBSERVE C13, 75.4536389 MHZ  
DECOUPLE H1, 300.0754430 MHZ  
Power 38 dB  
continuously on  
WALTZ-16 modulated  
DATA PROCESSING  
line broadening 0.5 Hz  
FT size 32768  
Total time 5 hr, 47 min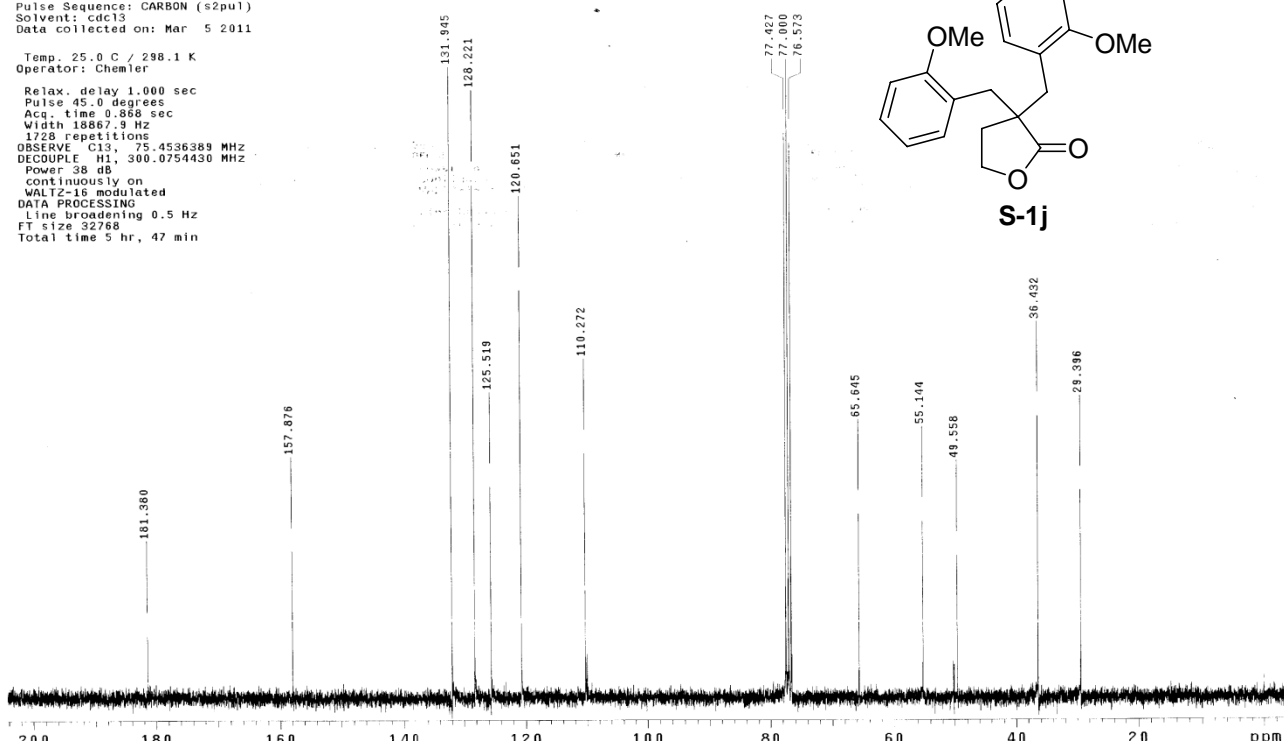

20110310diomethoxyalcoholsubstrate  
 Sample Name:  
 Data Collected on:  
 chemnmr500.chem.buffalo.edu-inova500  
 Archive directory:  
 Sample directory:  
 FidFile: PROTON  
 Pulse Sequence: PROTON (s2pul)  
 Solvent: cdcl3  
 Data collected on: Mar 10 2011  
 Temp. 24.0 C / 297.1 K  
 Operator: Chemler  
 Relax. delay 1.000 sec  
 Pulse 45.0 degrees  
 Acq. time 2.048 sec  
 Width 8000.0 Hz  
 8 repetitions  
 OBSERVE H1, 499.8984088 MHz  
 DATA PROCESSING  
 FT size 32768  
 Total time 0 min 24 sec

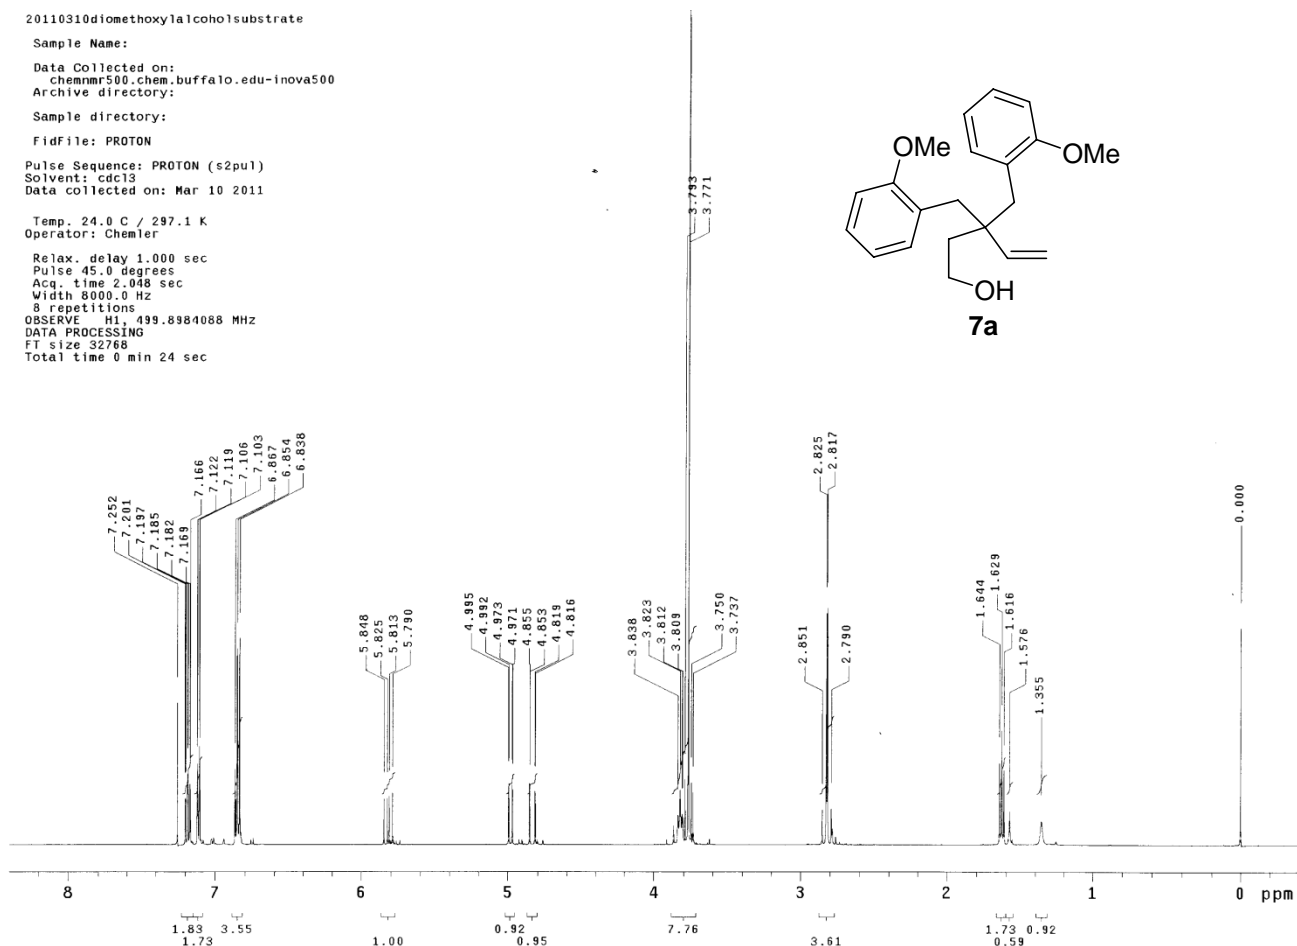

20110310diomethoxyalcoholsubstrateC13  
 Sample Name:  
 Data Collected on:  
 roesy.chem.buffalo.edu-mercury300  
 Archive directory:  
 Sample directory:  
 FidFile: CARBON  
 Pulse Sequence: CARBON (s2pul)  
 Solvent: cdcl3  
 Data collected on: Mar 10 2011  
 Temp. 25.0 C / 298.1 K  
 Operator: Chemler  
 Relax. delay 1.000 sec  
 Pulse 45.0 degrees  
 Acq. time 0.868 sec  
 Width 18867.9 Hz  
 3616 repetitions  
 OBSERVE C13, 75.4536389 MHz  
 DECOUPLE H1, 300.0754430 MHz  
 Power 38 dB  
 continuously on  
 WALTZ-16 modulated  
 DATA PROCESSING  
 Line broadening 0.5 Hz  
 FT size 32768  
 Total time 5 hr, 47 min

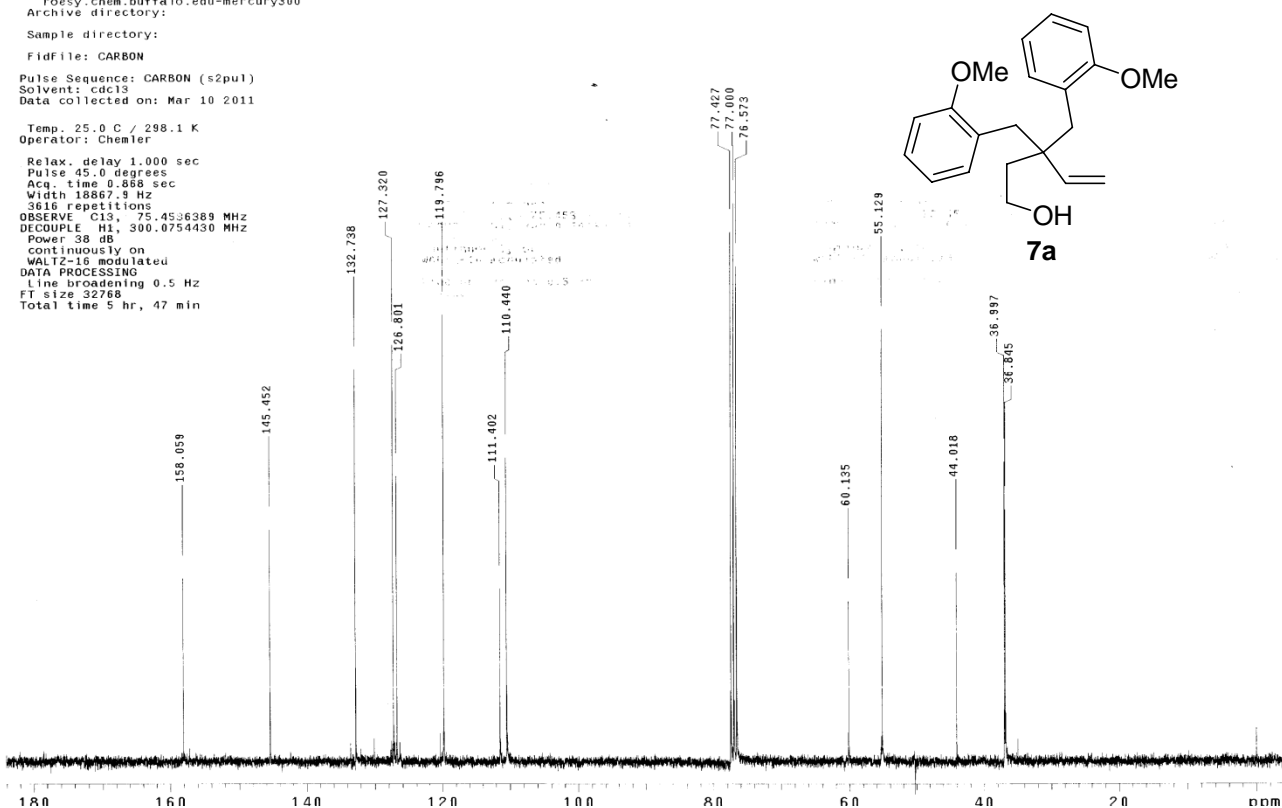

20110503methoxyllactone

Sample Name:  
 Data Collected on: chemmr500.chem.buffalo.edu-inova500  
 Archive directory:  
 Sample directory:  
 FidFile: PROTON  
 Pulse Sequence: PROTON (s2pu1)  
 Solvent: cdcl3  
 Data collected on: May 3 2011  
 Operator: Chemler  
 Relax. delay 1.13 sec  
 Pulse 45.0 degrees  
 Acq. time 2.048 sec  
 Width 8000.0 Hz  
 8 repetitions  
 OBSERVE H1, 499.8984034 MHz  
 DATA PROCESSING  
 FT size 32768  
 Total time 0 min 24 sec

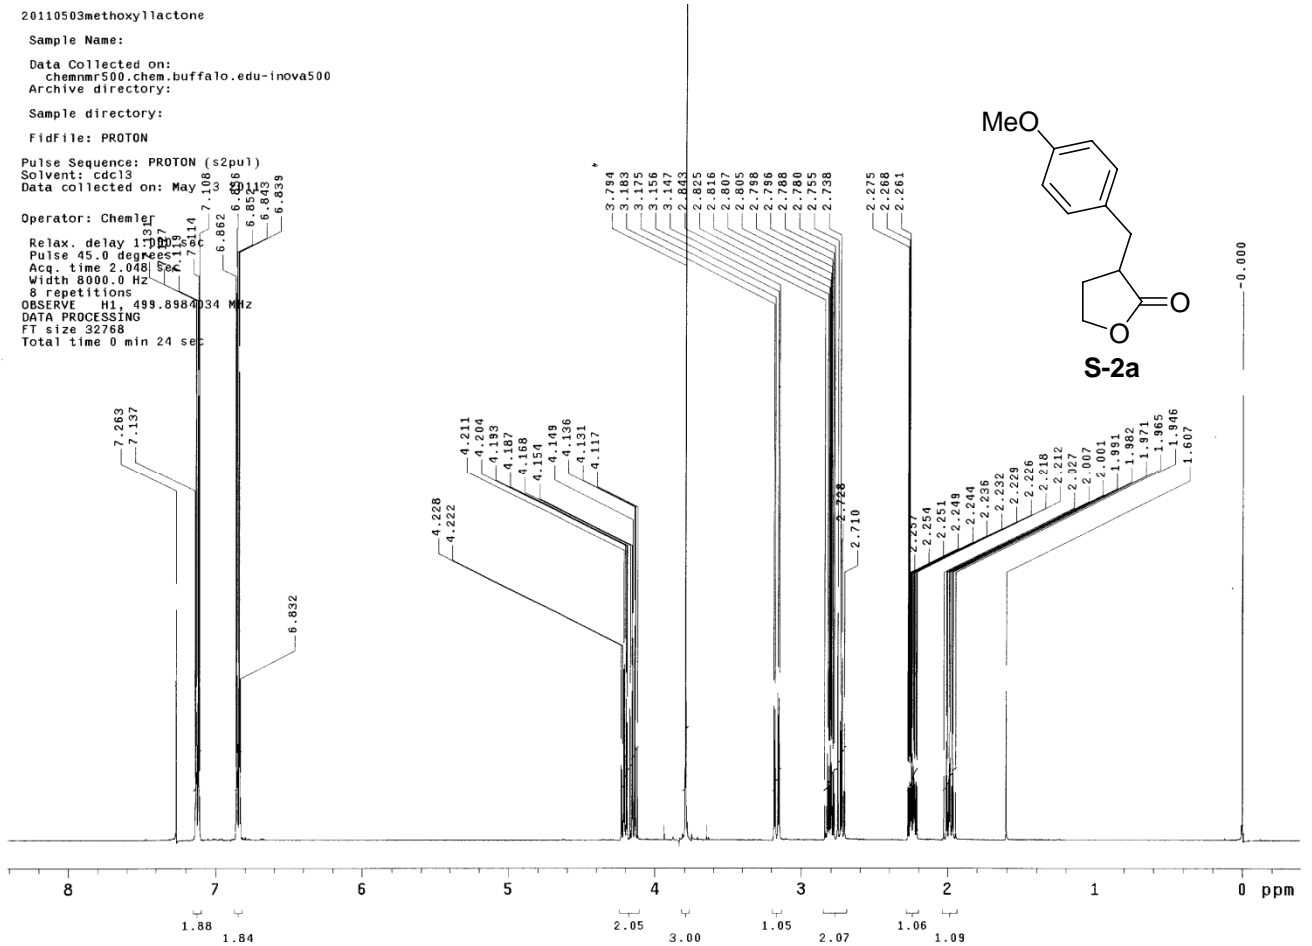

20110503methoxyllactoneC13

Sample Name:  
 Data Collected on: roesy.chem.buffalo.edu-mercury300  
 Archive directory:  
 Sample directory:  
 FidFile: CARBON  
 Pulse Sequence: CARBON (s2pu1)  
 Solvent: cdcl3  
 Data collected on: May 3 2011  
 Temp. 21.0 C / 294.1 K  
 Operator: Chemler  
 Relax. delay 1.000 sec  
 Pulse 45.0 degrees  
 Acq. time 0.868 sec  
 Width 18867.9 Hz  
 1376 repetitions  
 OBSERVE C13, 75.4536389 MHz  
 DECOUPLE H1, 300.0754430 MHz  
 Power 38 db  
 continuously on  
 WALTZ-16 modulated  
 DATA PROCESSING  
 Line broadening 0.5 Hz  
 FT size 32768  
 Total time 1 hr, 9 min

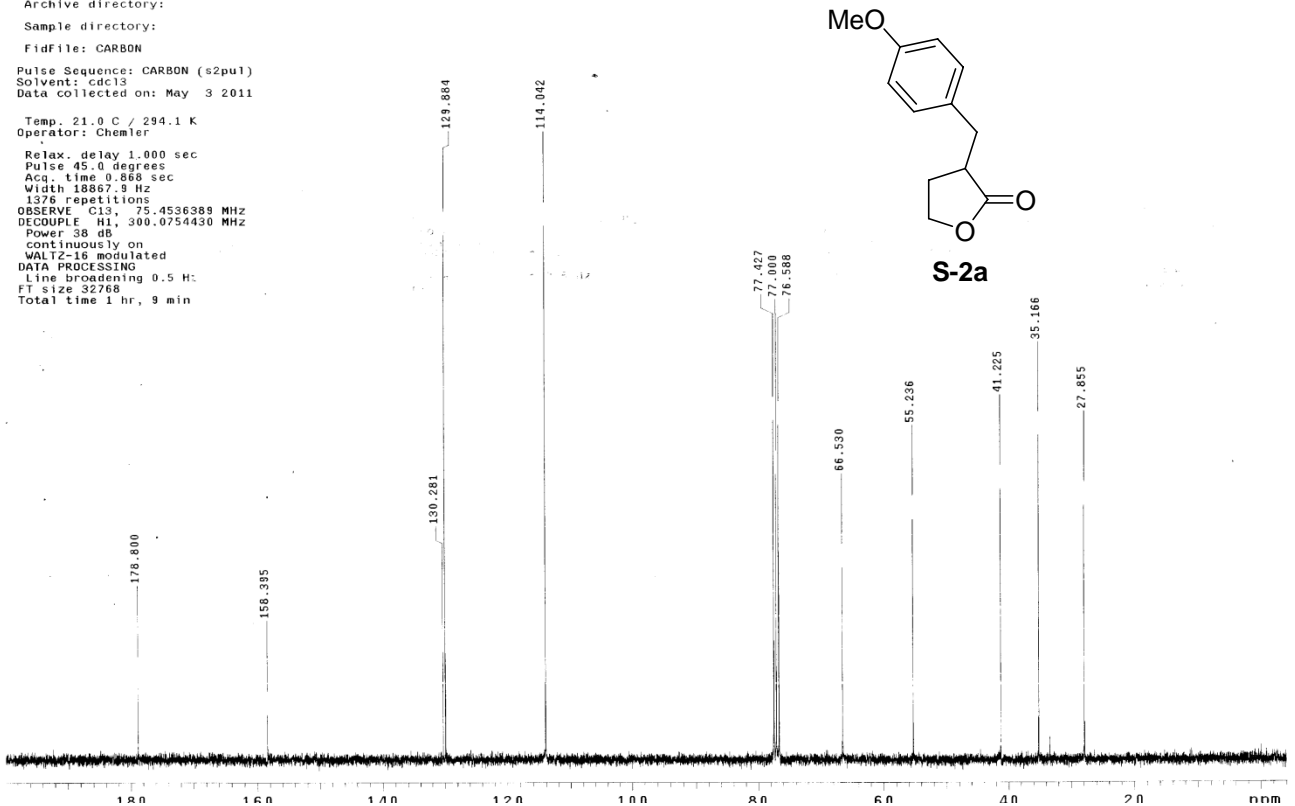

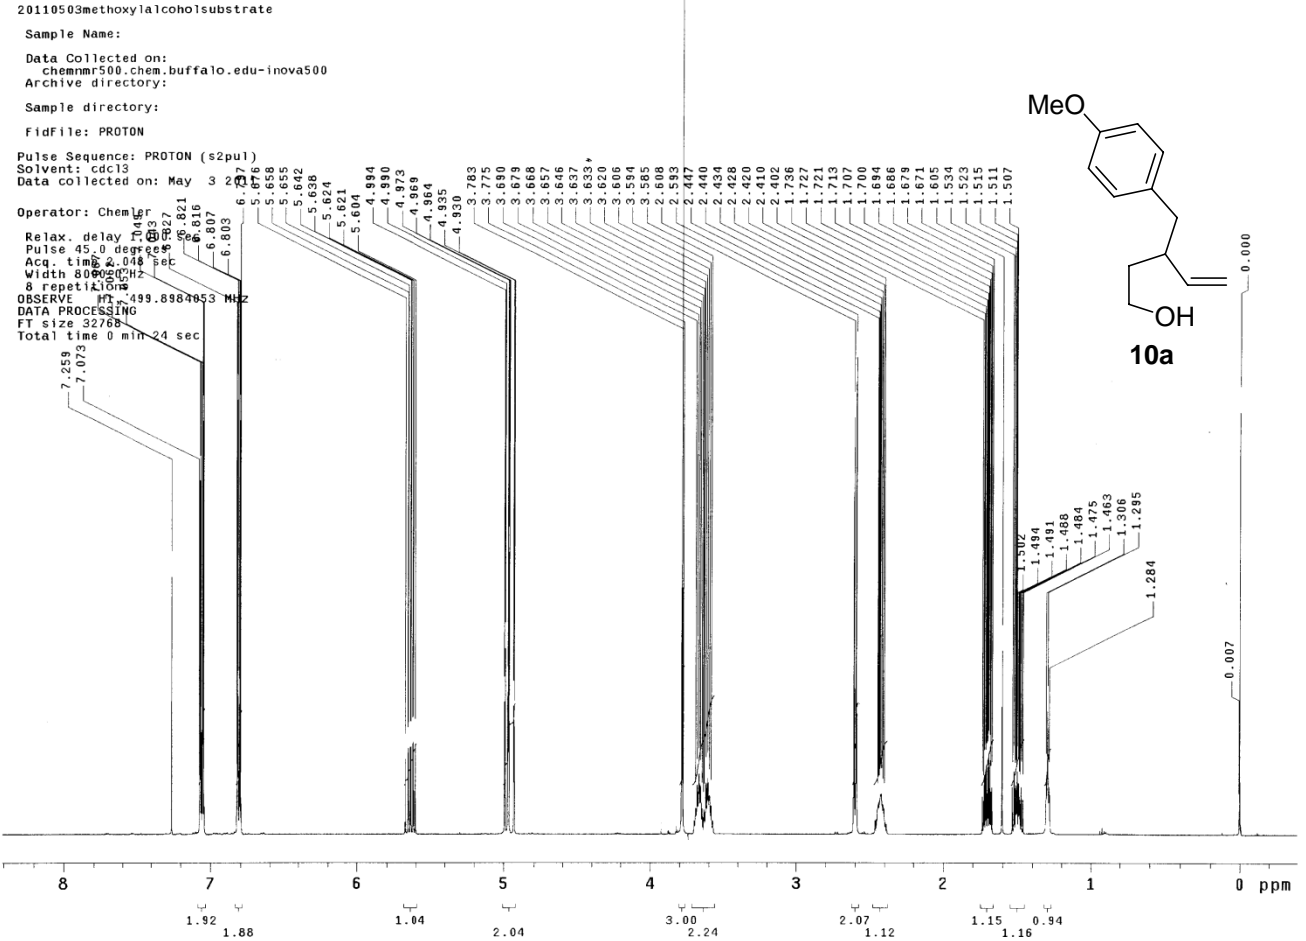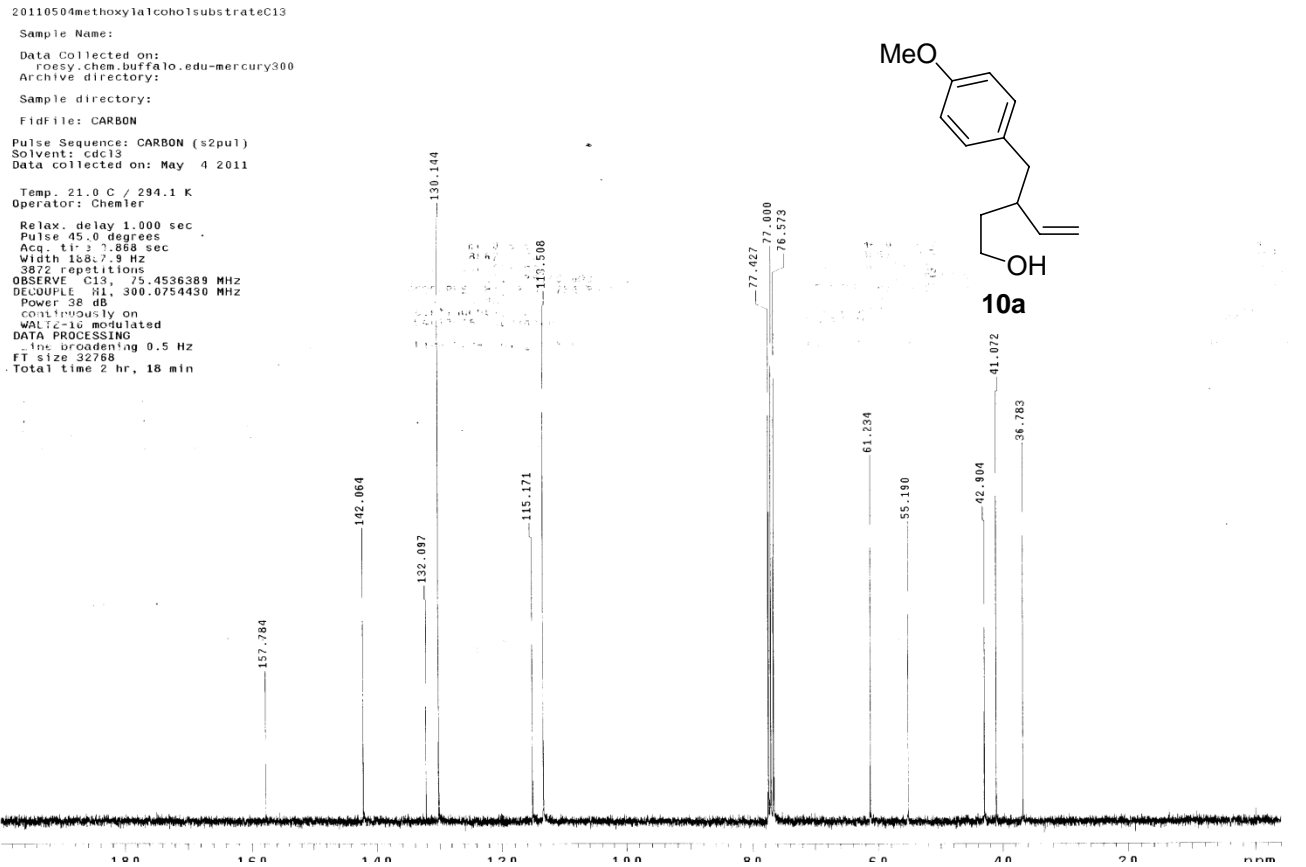

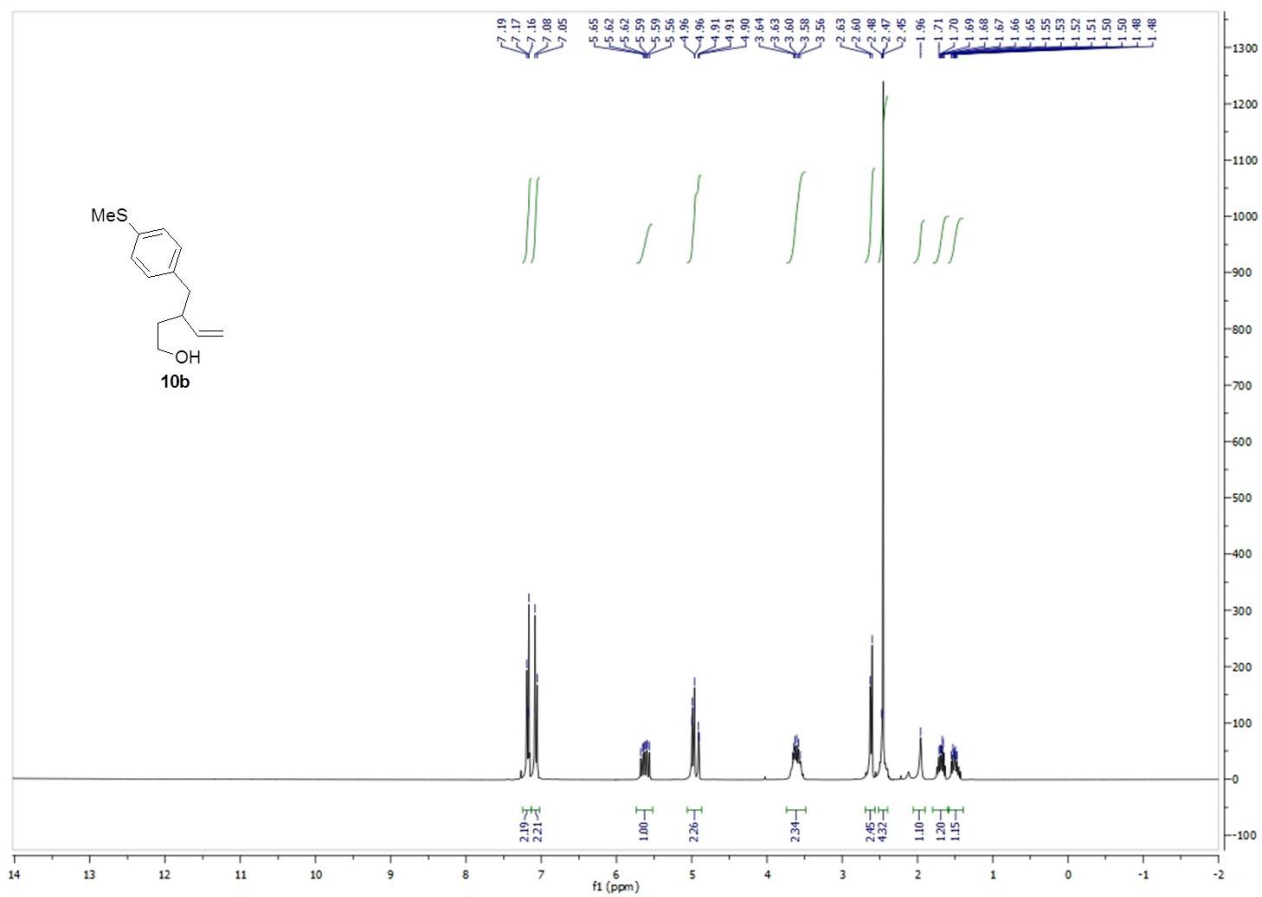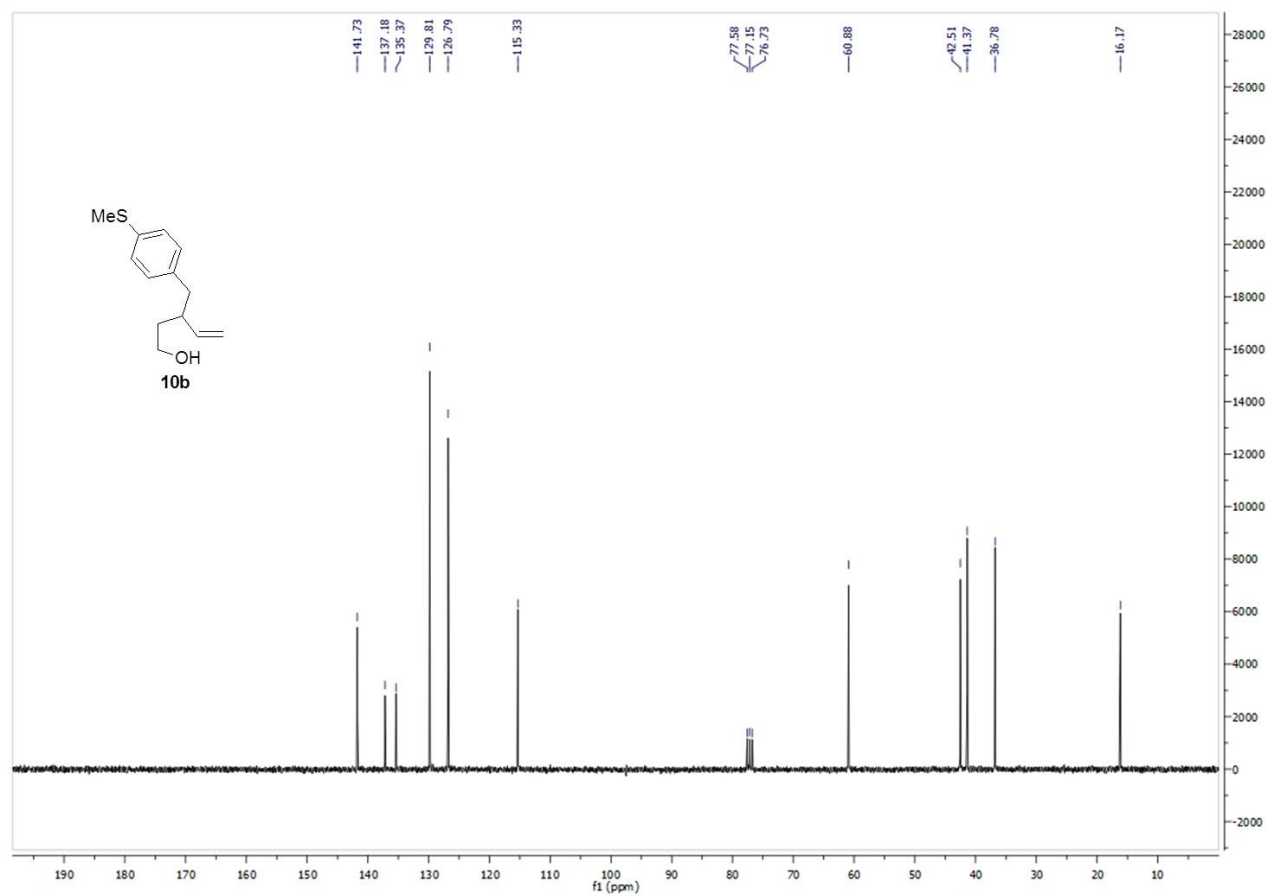

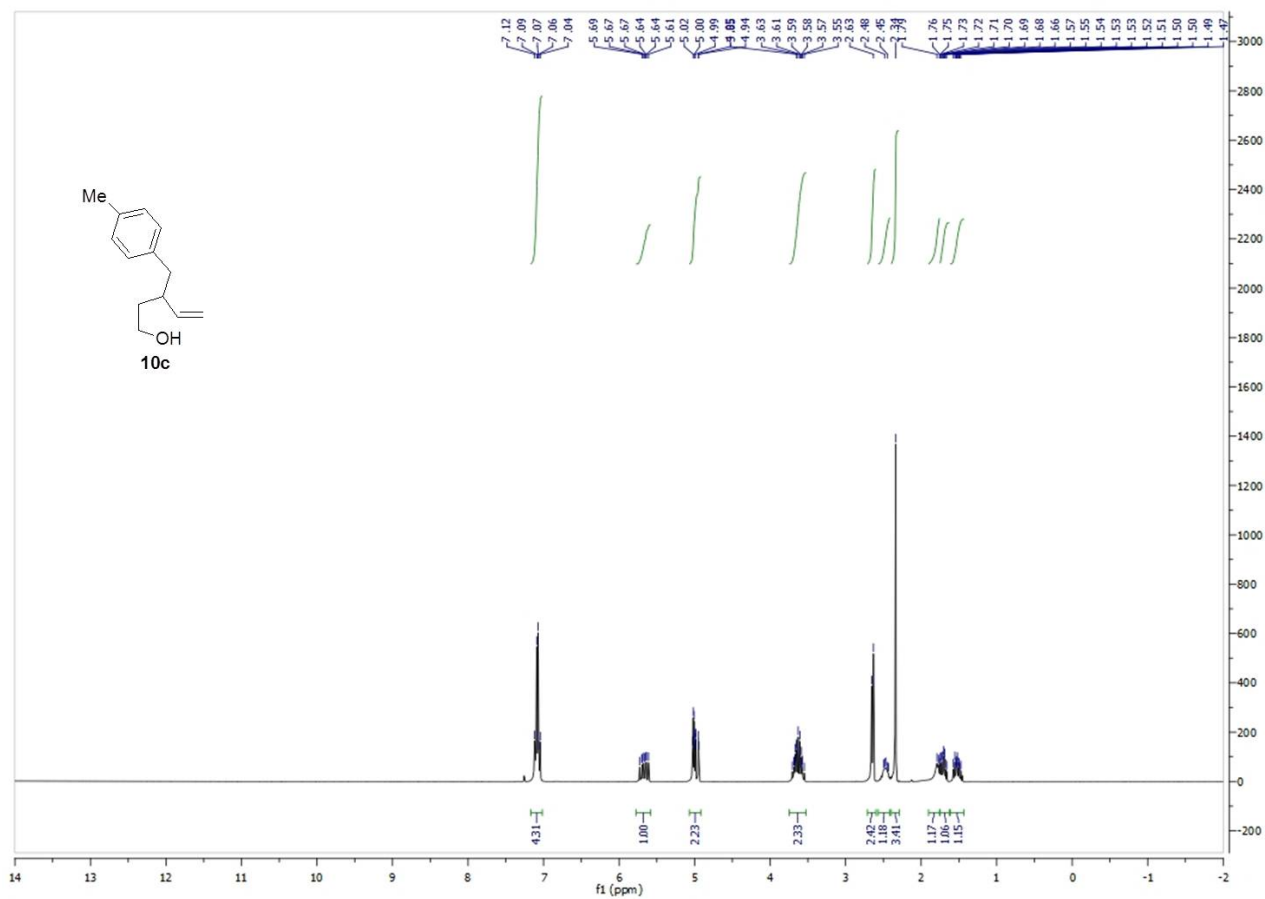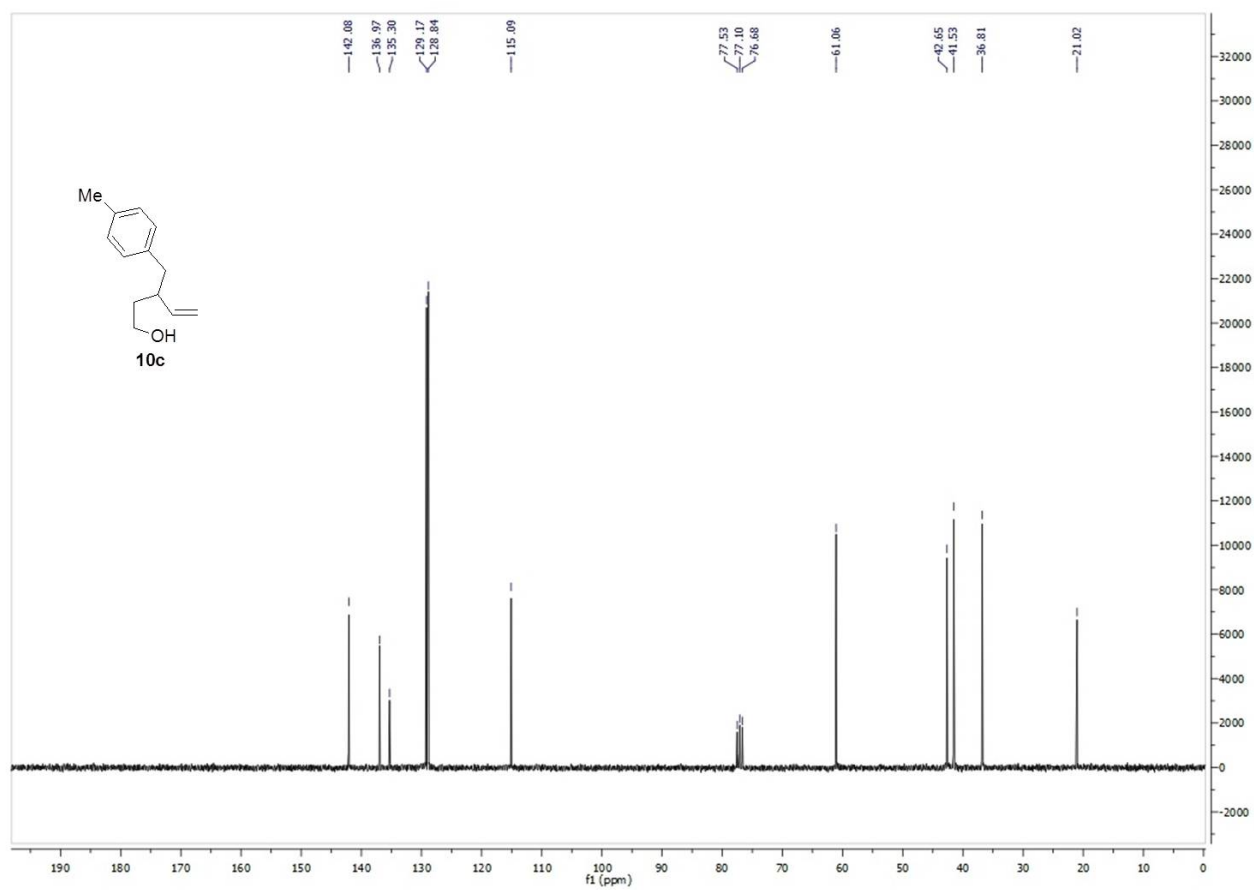

20110809dibenzylphenylsubstrate

Sample Name:

Data Collected on: chemmr500.chem.buffalo.edu-inova500  
Archive directory:

Sample directory:

FidFile: PROTON

Pulse Sequence: PROTON (s2pu1)  
Solvent: cdcl3  
Data collected on: 8/9/2011

Operator: Chemler

Relax. delay 1.000 sec  
Pulse 45.0 degrees  
Acq. time 2.048 sec  
Width 8000.0 Hz  
8 repetitions  
OBSERVE H1, 499.8984146 MHz  
DATA PROCESSING  
FT size 32768  
Total time 0 min 24 sec

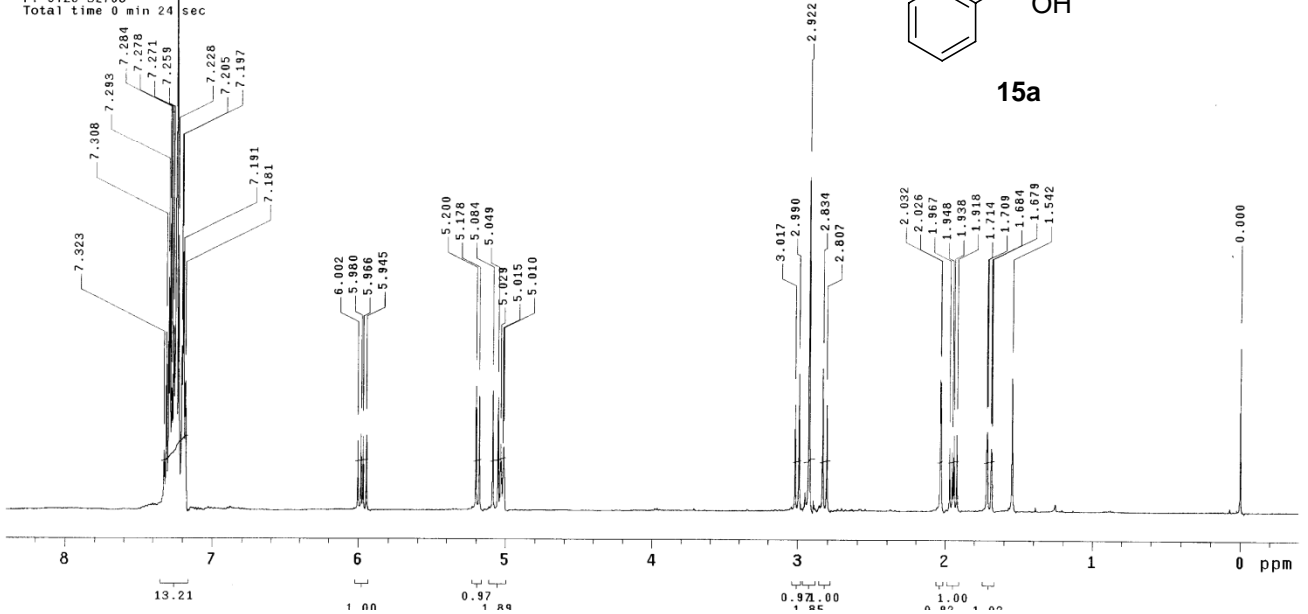

20110622dibenzylphenylalcoholsubstrateC13

Sample Name:

Data Collected on: roessy.chem.buffalo.edu-mercury300  
Archive directory:

Sample directory:

FidFile: CARBON

Pulse Sequence: CARBON (s2pu1)  
Solvent: cdcl3  
Data collected on: Jun 22 2011

Temp. 25.0 C / 298.1 K

Operator: Chemler

Relax. delay 1.000 sec  
Pulse 45.0 degrees  
Acq. time 0.868 sec  
Width 18867.9 Hz  
3968 repetitions  
OBSERVE C13, 75.4536389 MHz  
DECOUPLE H1, 300.0754430 MHz  
Power 38 dB  
continuously on  
WALTZ-16 modulated  
DATA PROCESSING  
Line broadening 0.5 Hz  
FT size 32768  
Total time 2 hr, 18 min

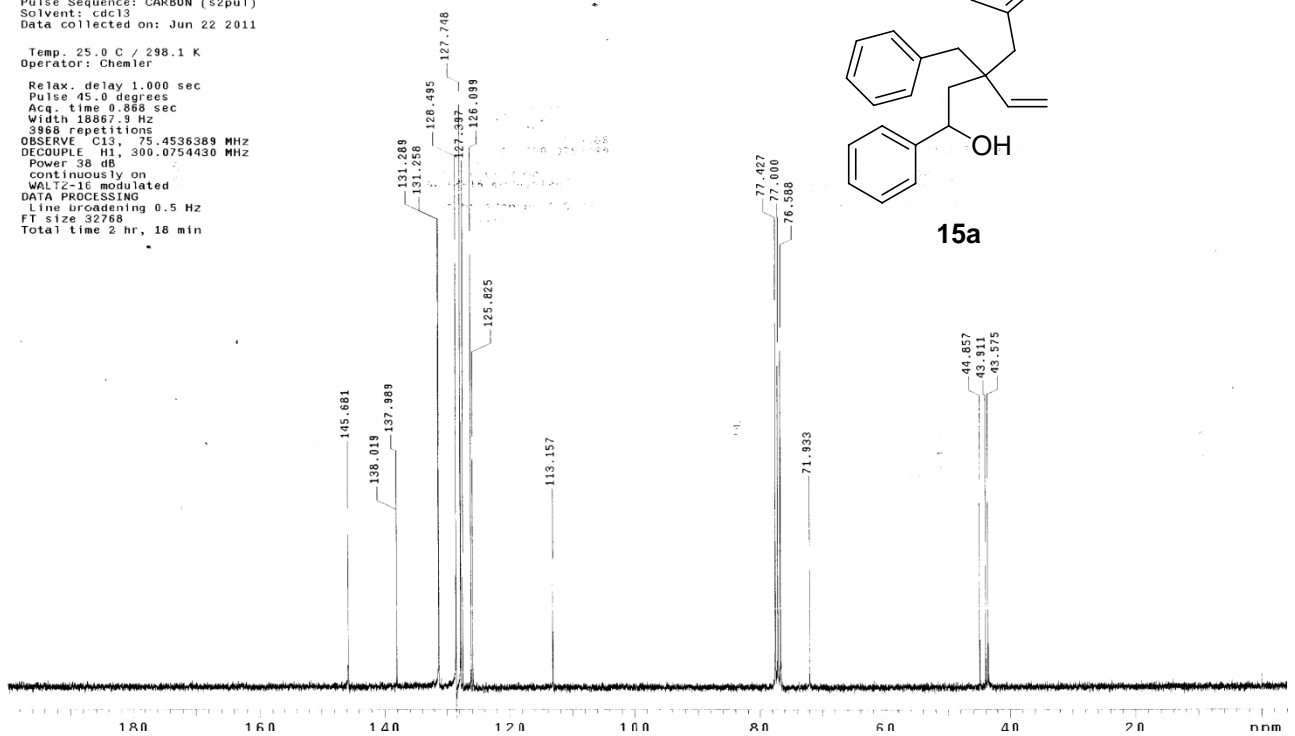



20110804dibenzylallylsubstrate

Sample Name:  
 Data Collected on:  
 chemmr500.chem.buffalo.edu-inova500  
 Archive directory:  
 Sample directory:  
 FidFile: PROTON

Pulse Sequence: PROTON (s2pul)  
 Solvent: cdc13  
 Data collected on: Aug 4 2011  
 Operator: Chemler  
 Relax. delay 1.000 sec  
 Pulse 45.0 degrees  
 Acq. time 2.098 sec  
 Width 8000.0 Hz  
 8 repetitions  
 OBSERVE H1, 499.854102 MHz  
 DATA PROCESSING  
 FT size 32768  
 Total time 0 min 24 sec

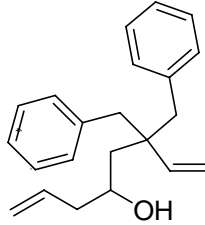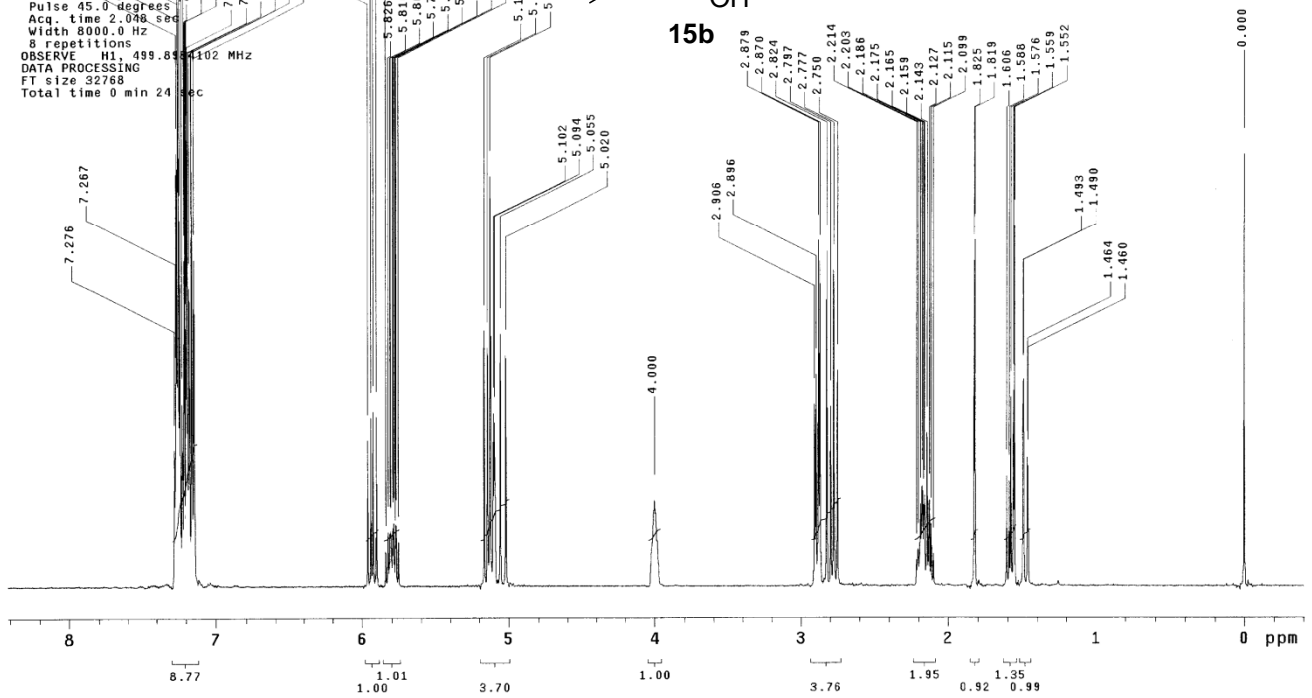

20110804dibenzylallylsubstrateC13

Sample Name:  
 Data Collected on:  
 roesy.chem.buffalo.edu-mercury300  
 Archive directory:  
 Sample directory:  
 FidFile: CARBON

Pulse Sequence: CARBON (s2pul)  
 Solvent: cdc13  
 Data collected on: Aug 4 2011  
 Temp. 22.0 C / 295.1 K  
 Operator: Chemler  
 Relax. delay 1.000 sec  
 Pulse 45.0 degrees  
 Acq. time 0.868 sec  
 Width 18867.9 Hz  
 5344 repetitions  
 OBSERVE C13, 75.4536377 MHz  
 DECOUPLE H1, 300.0754430 MHz  
 Power 38 dB  
 continuously on  
 WALTZ-16 modulated  
 DATA PROCESSING  
 Line broadening 0.5 Hz  
 FT size 32768  
 Total time 5 hr, 47 min

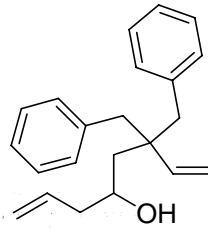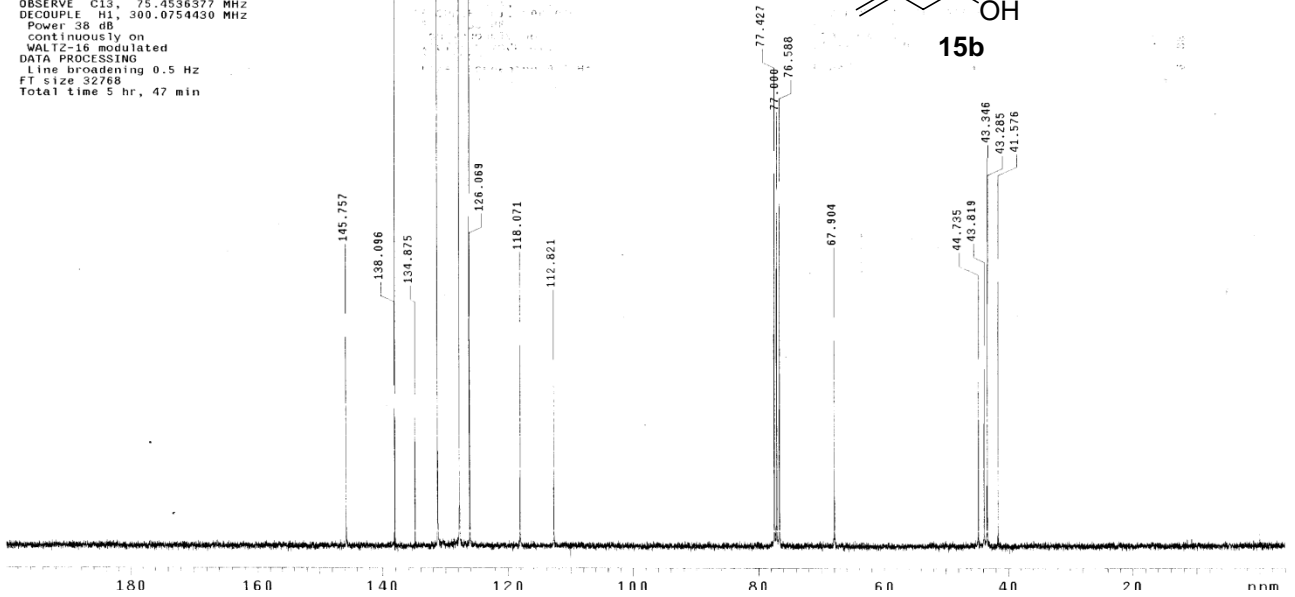

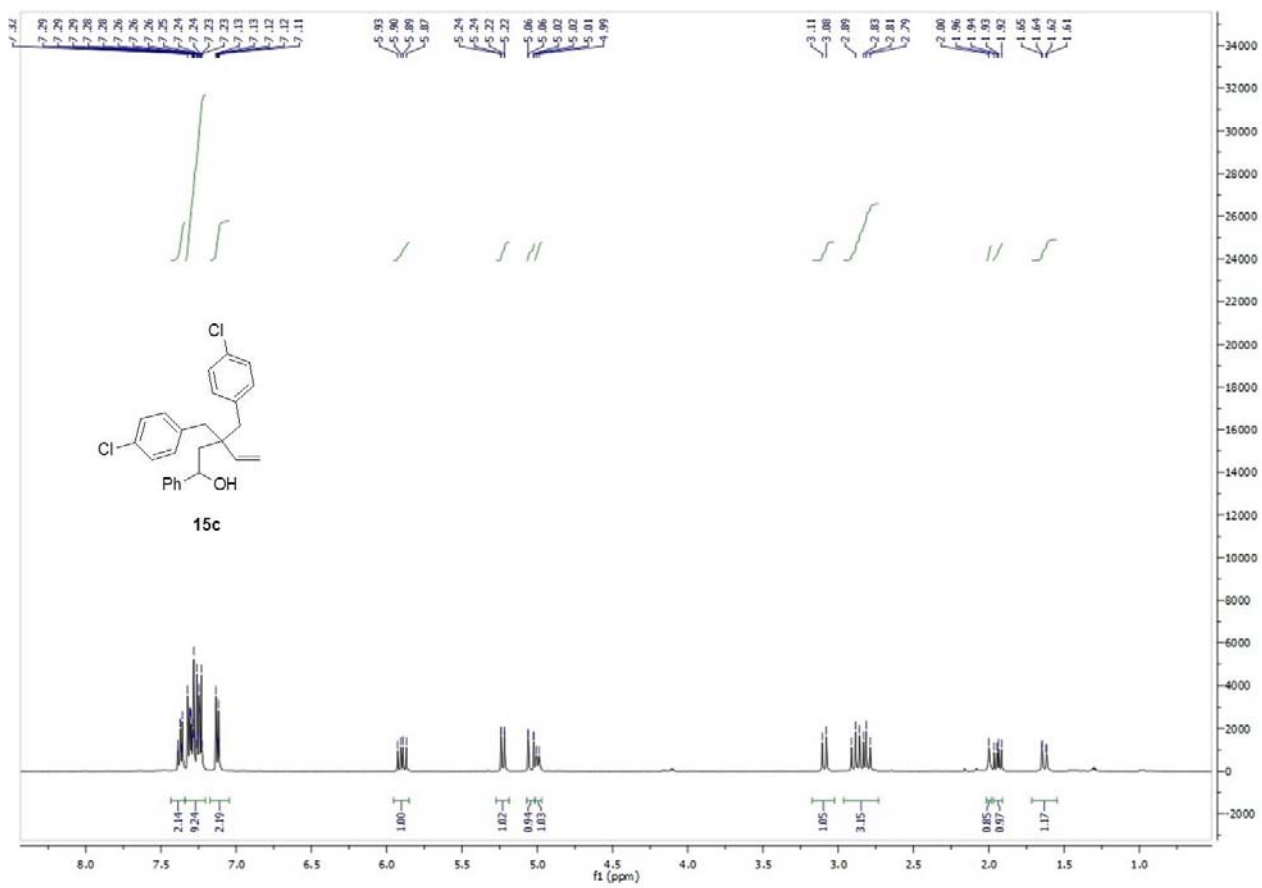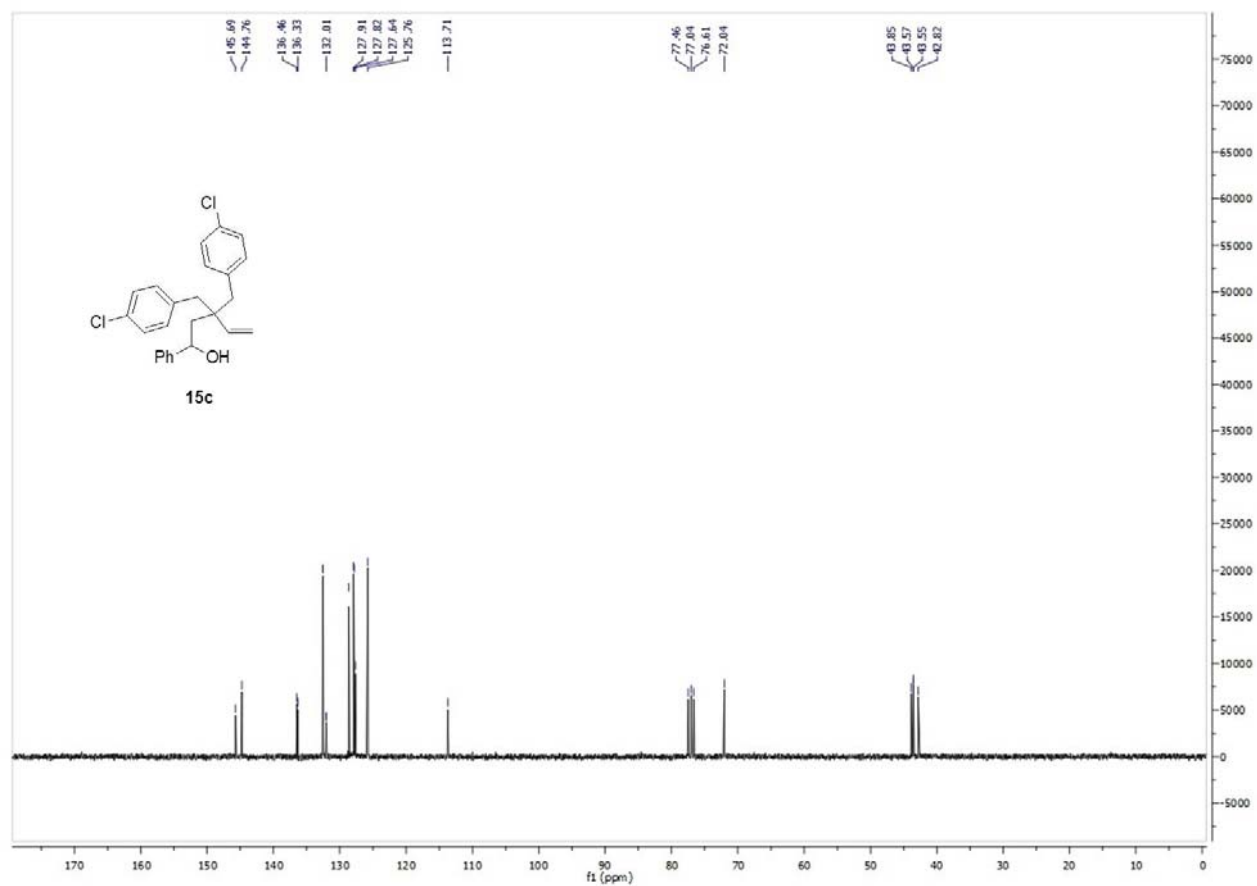

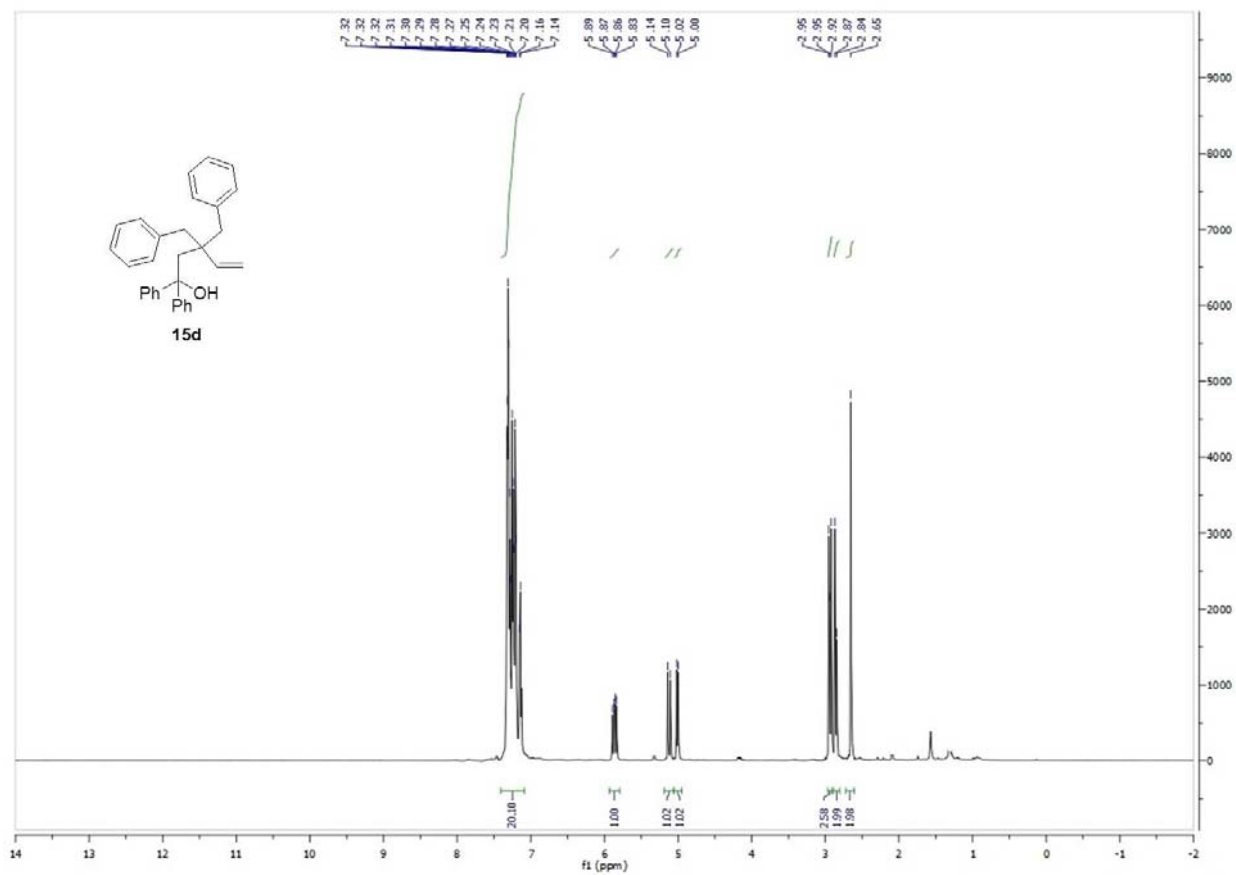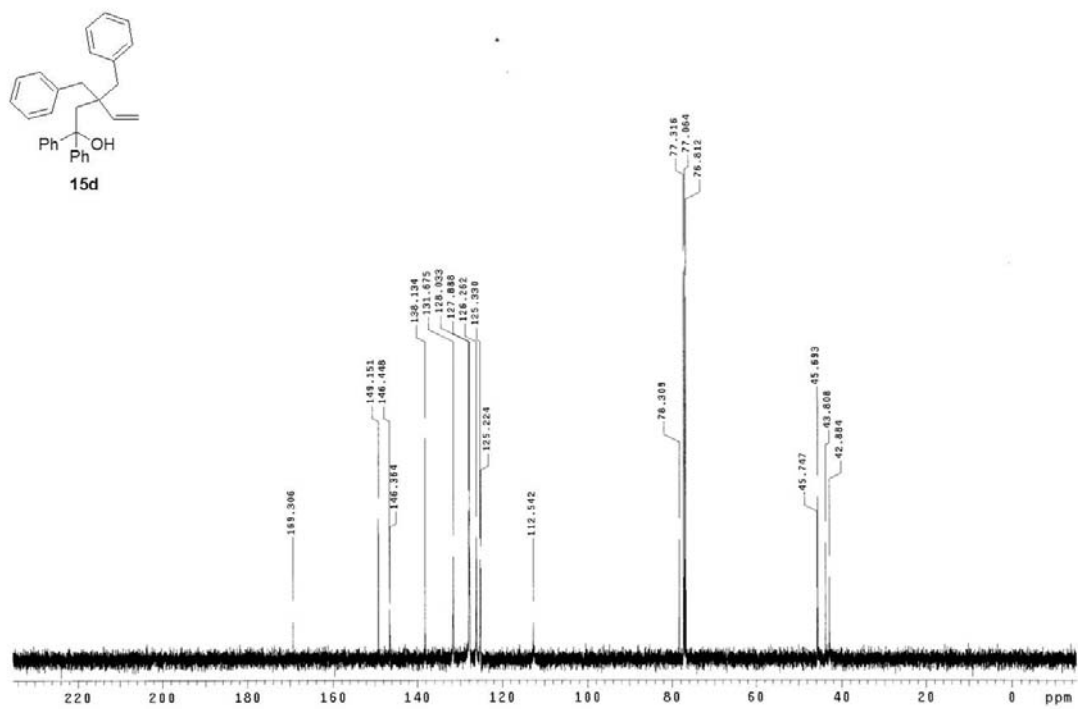

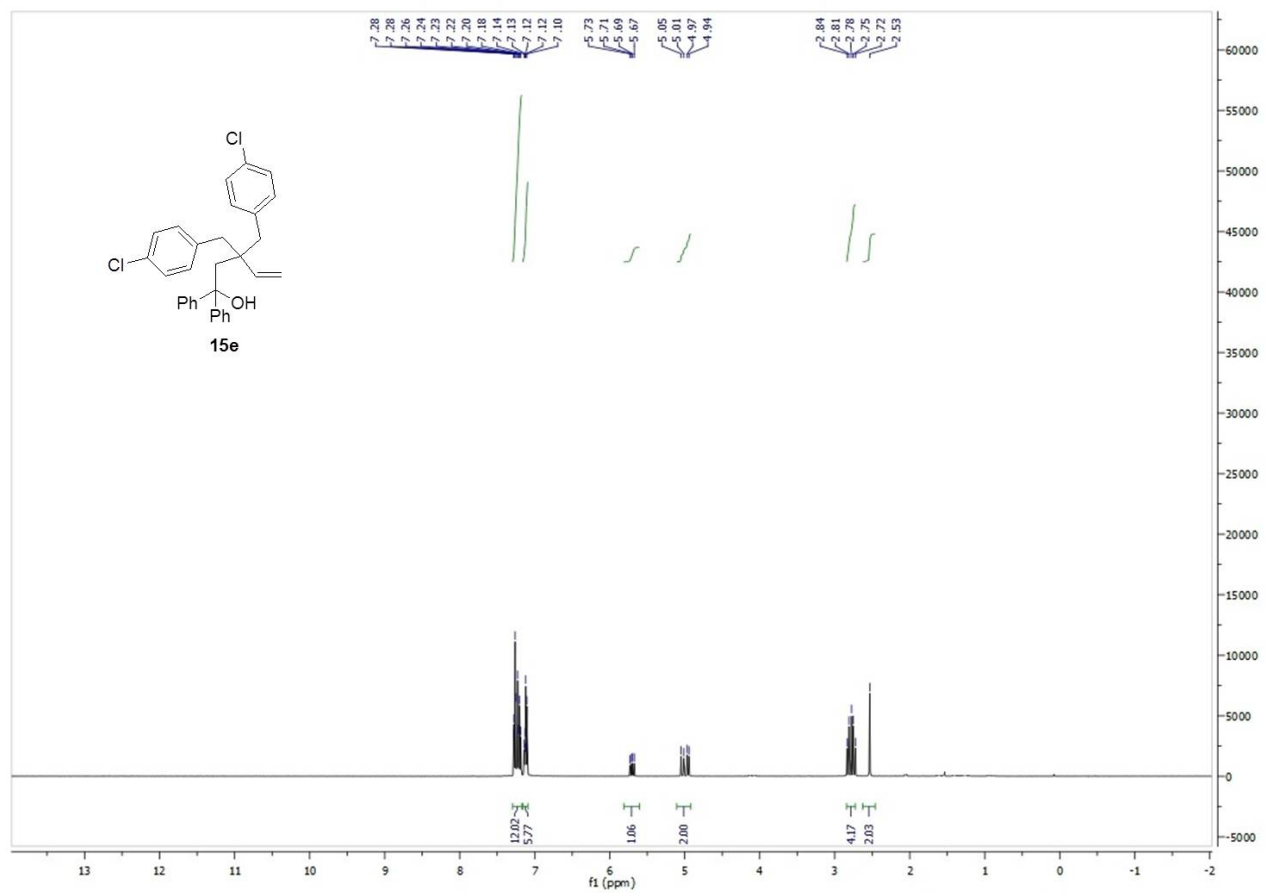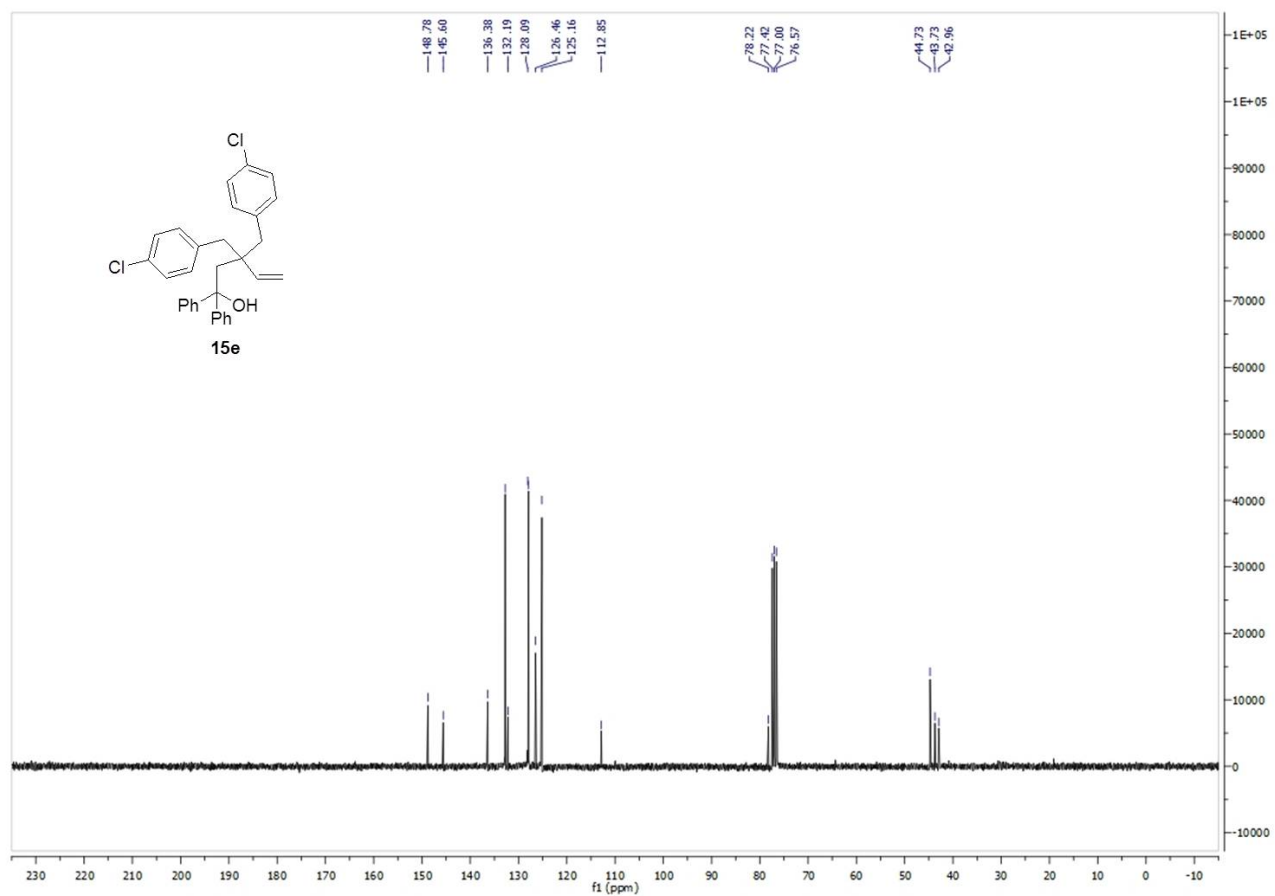



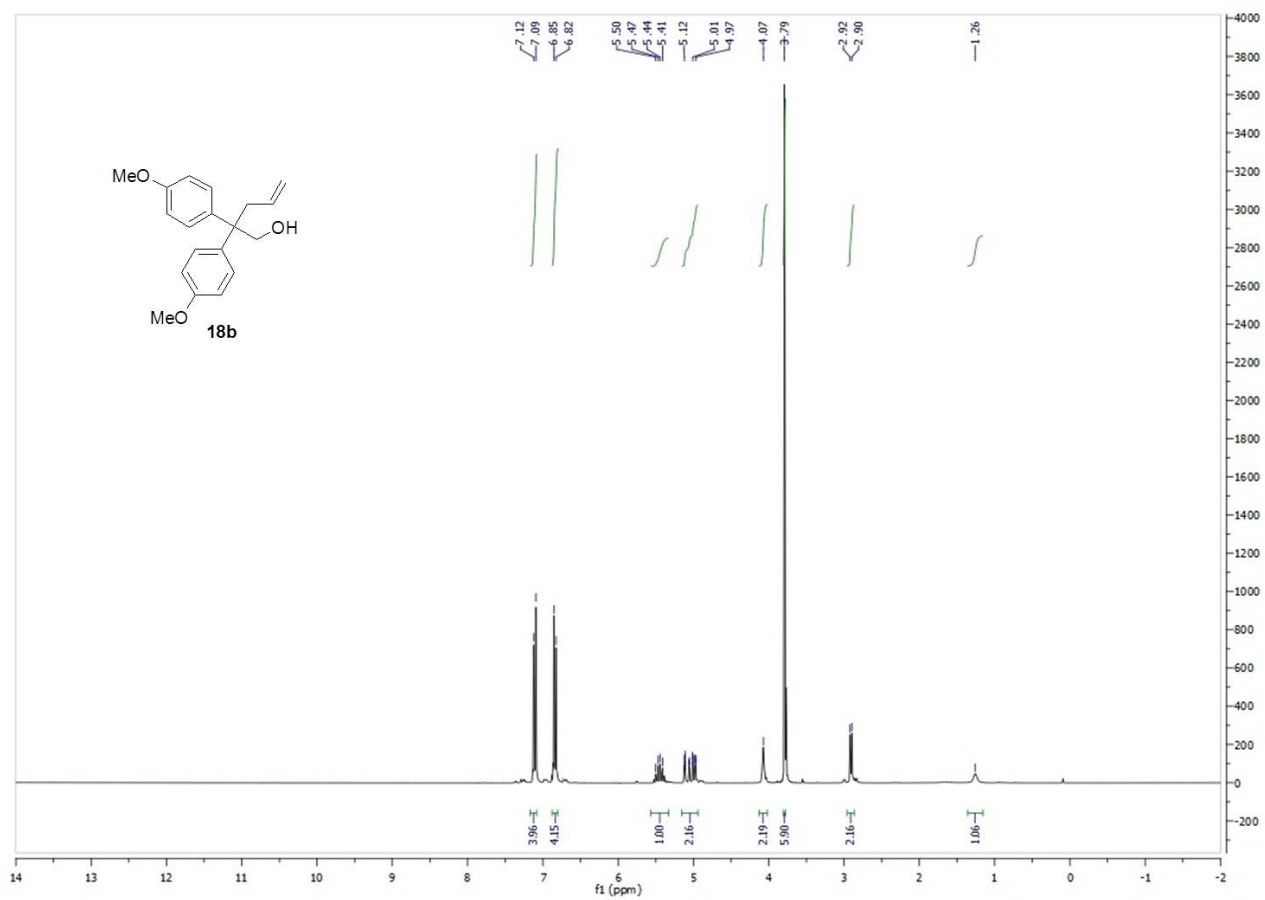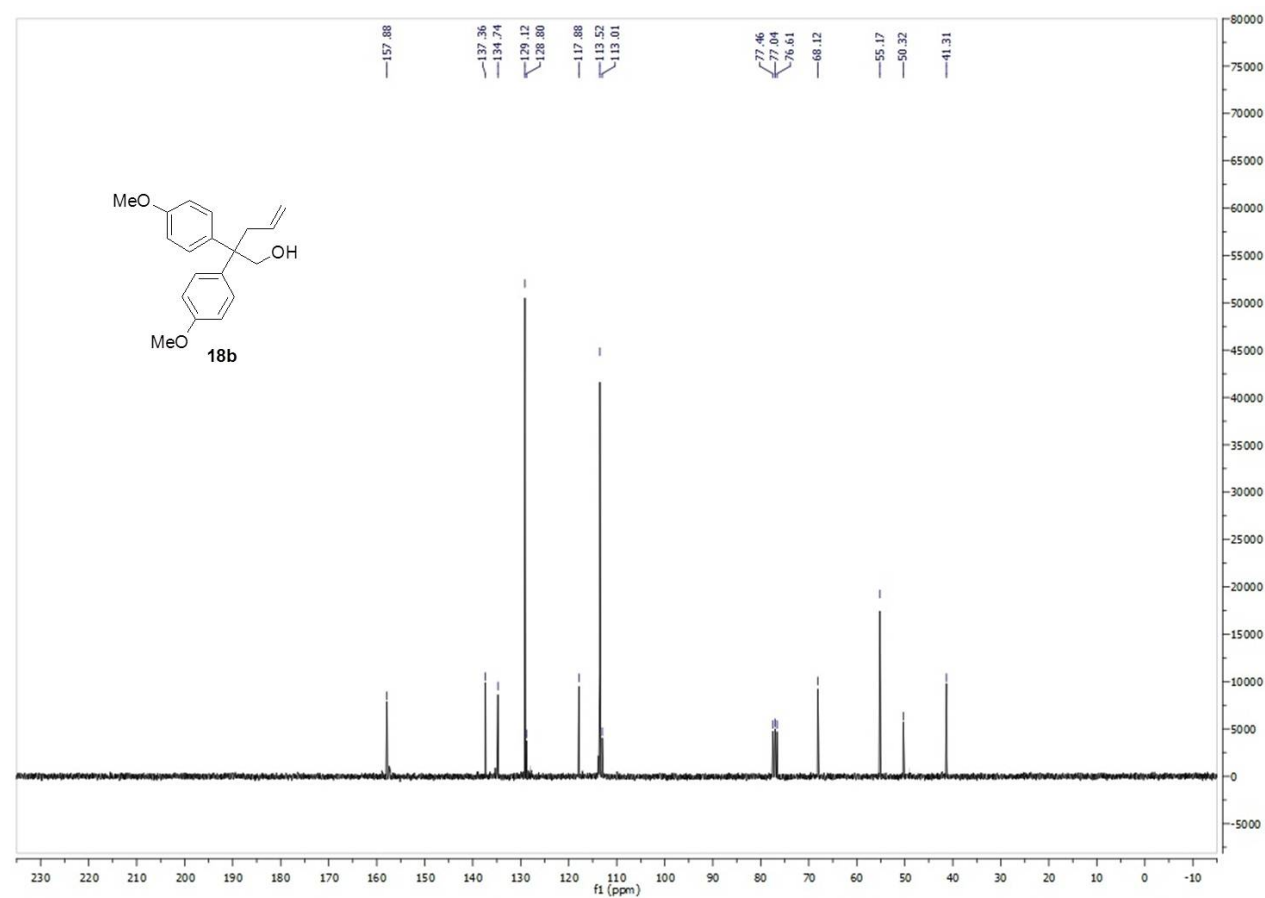

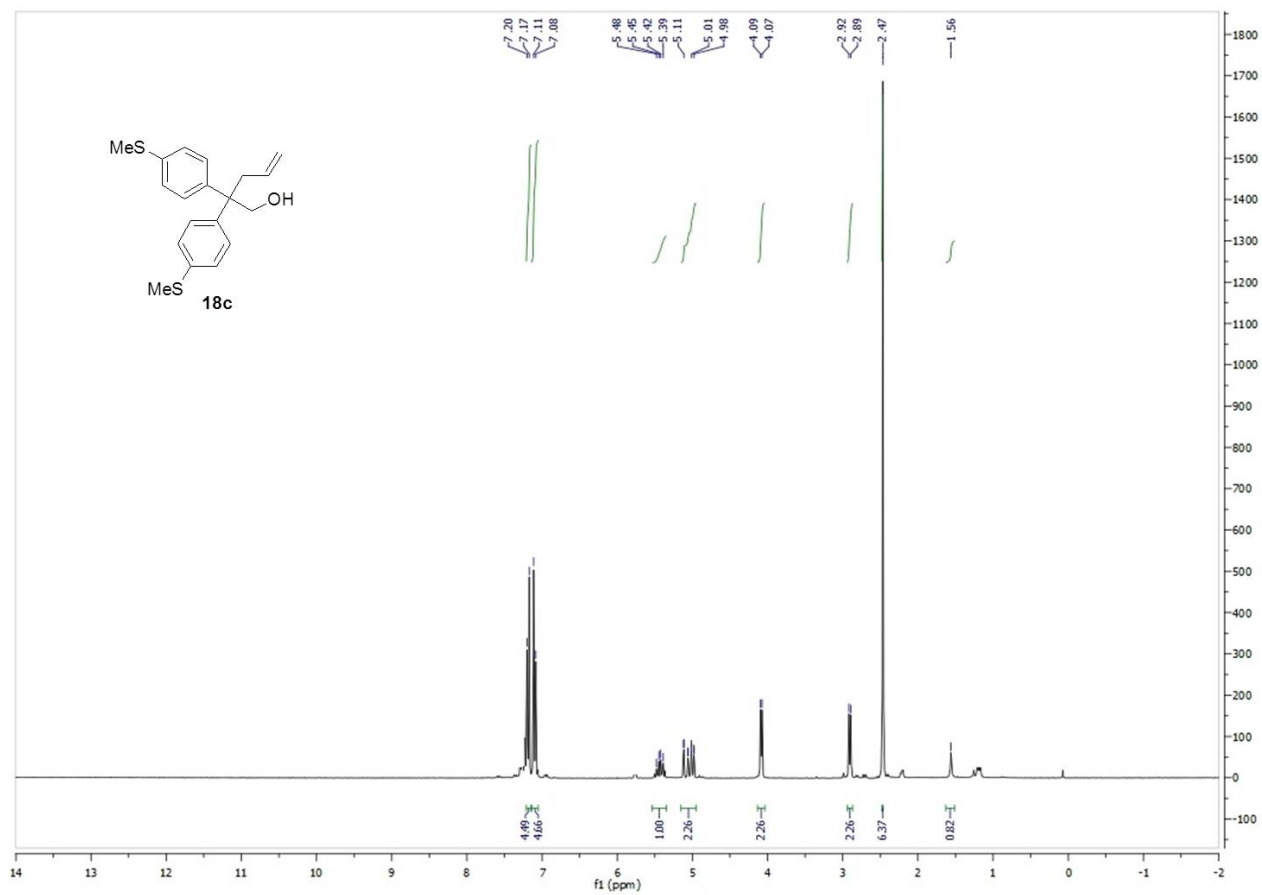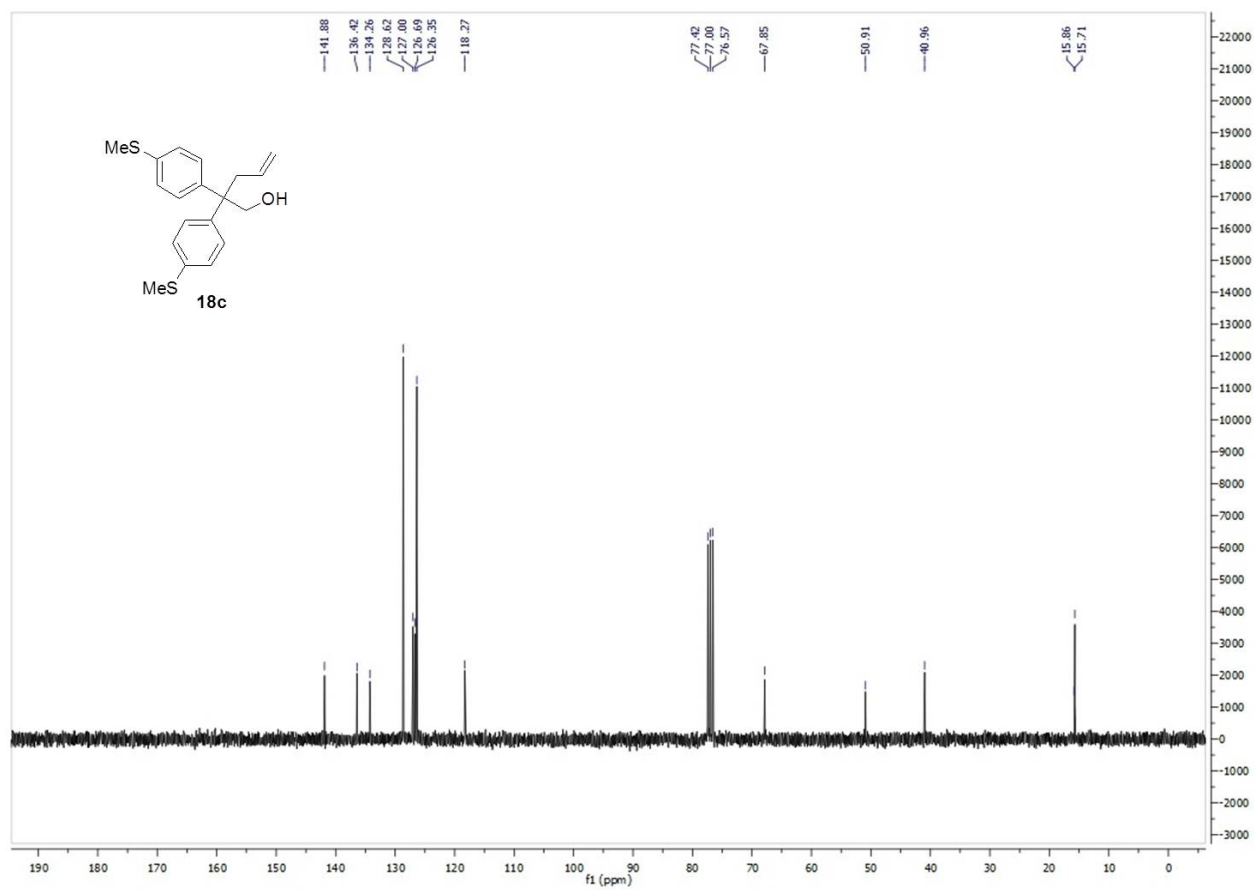

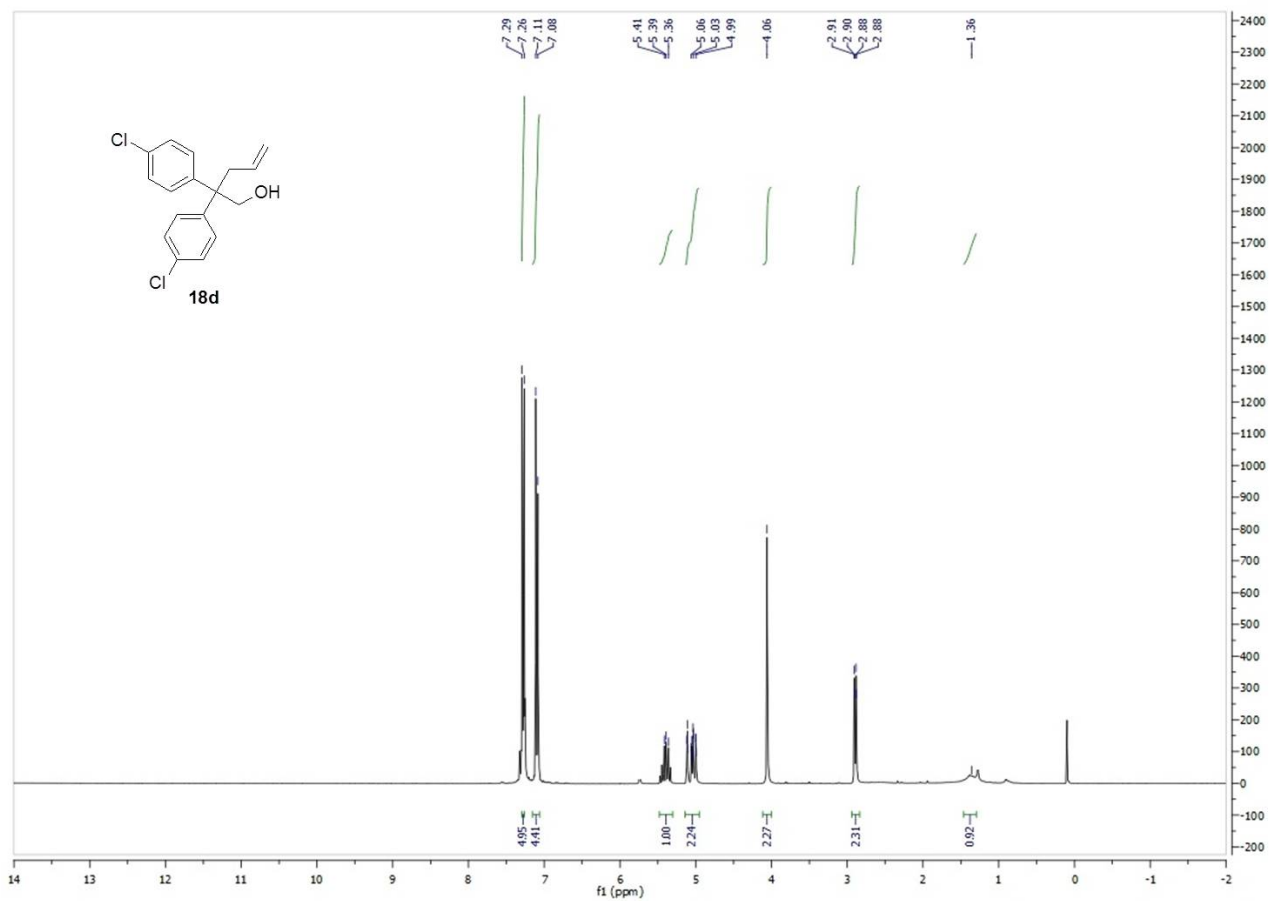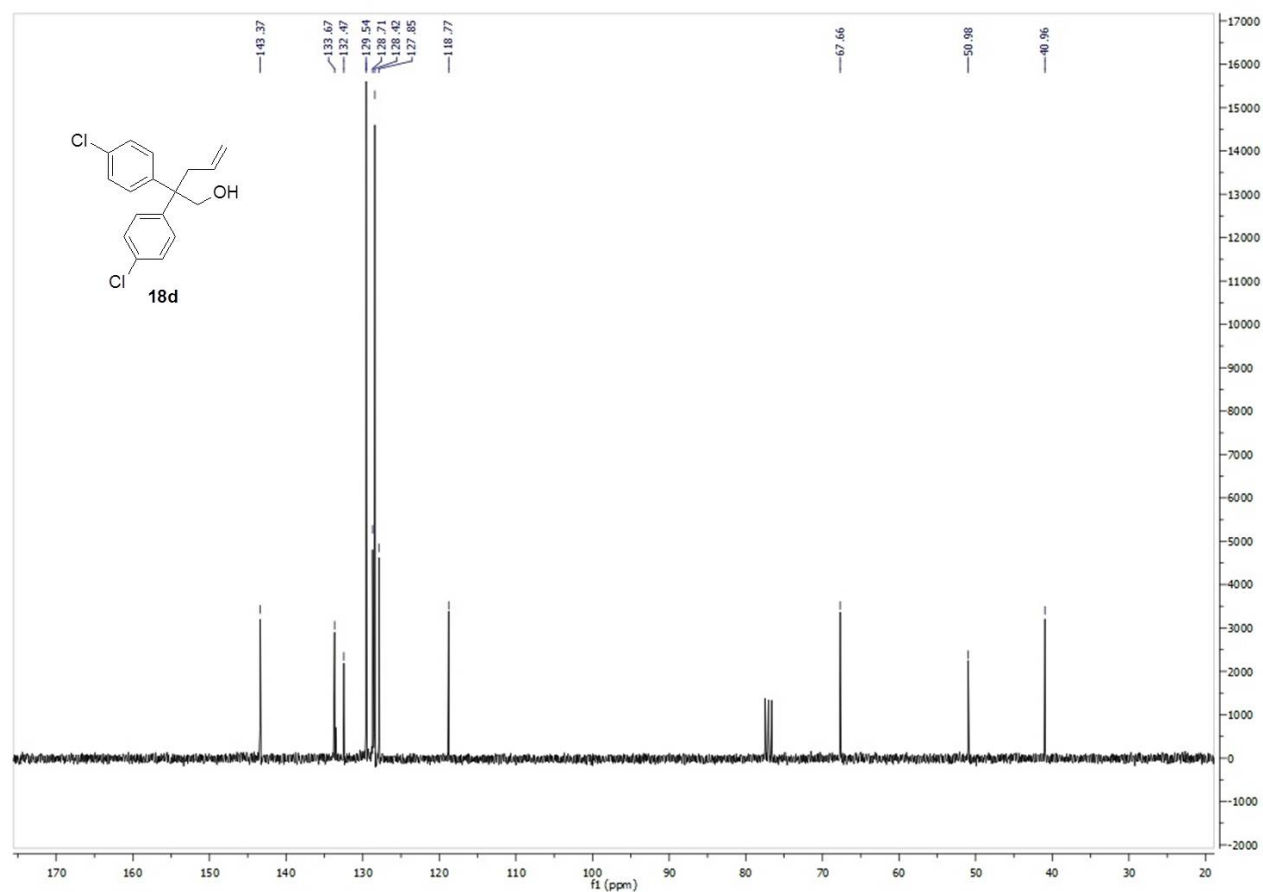



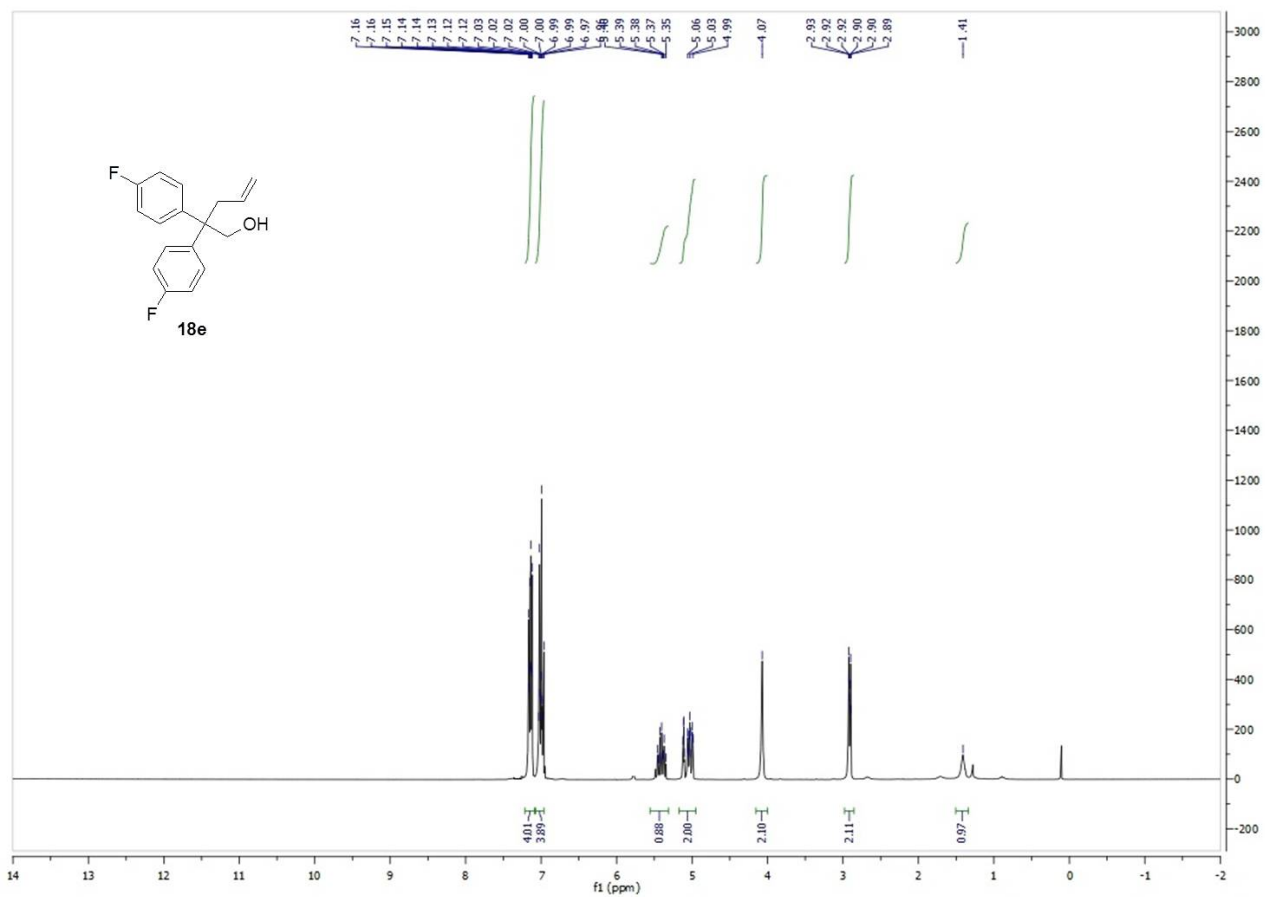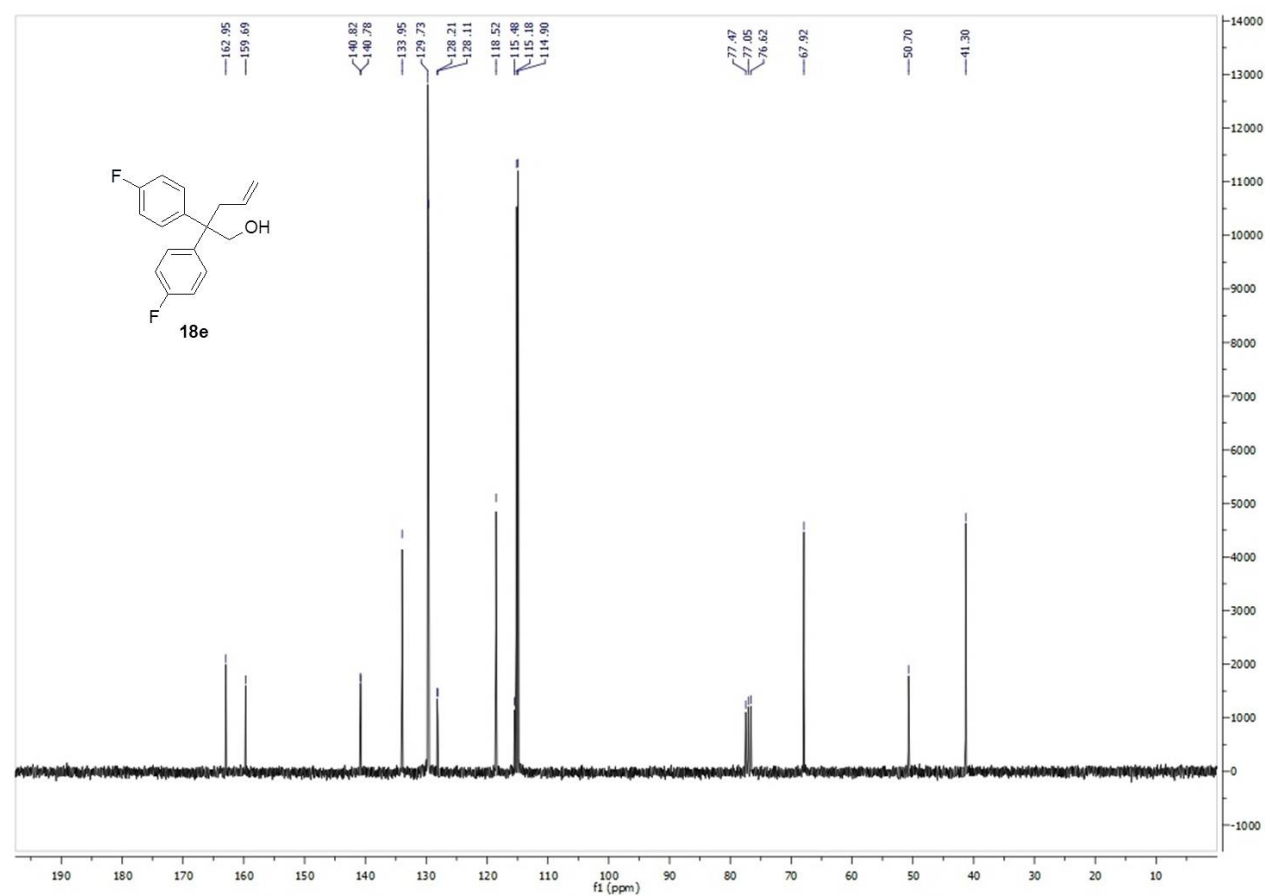

20110519methoxylalkynealcohol  
 Sample Name:  
 Data Collected on:  
 chemmr500.chem.buffalo.edu-inova500  
 Archive directory:  
 Sample directory:  
 FidFile: 20110519methoxylalkynealcohol  
 Pulse Sequence: PROTON (s2pu1)  
 Solvent: cdcl3  
 Data collected on: May 19 2011  
 Operator: Chemler  
 Relax. delay 1.000 sec  
 Pulse 45.0 degrees  
 Acq. time 2.048 sec  
 Width 8000.0 Hz  
 8 repetitions  
 OBSERVE H1, 499.8984058 MHz  
 DATA PROCESSING  
 FT size 32768  
 Total time 0 min 24 sec

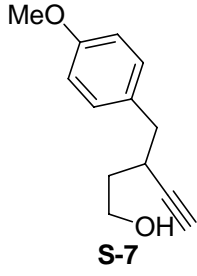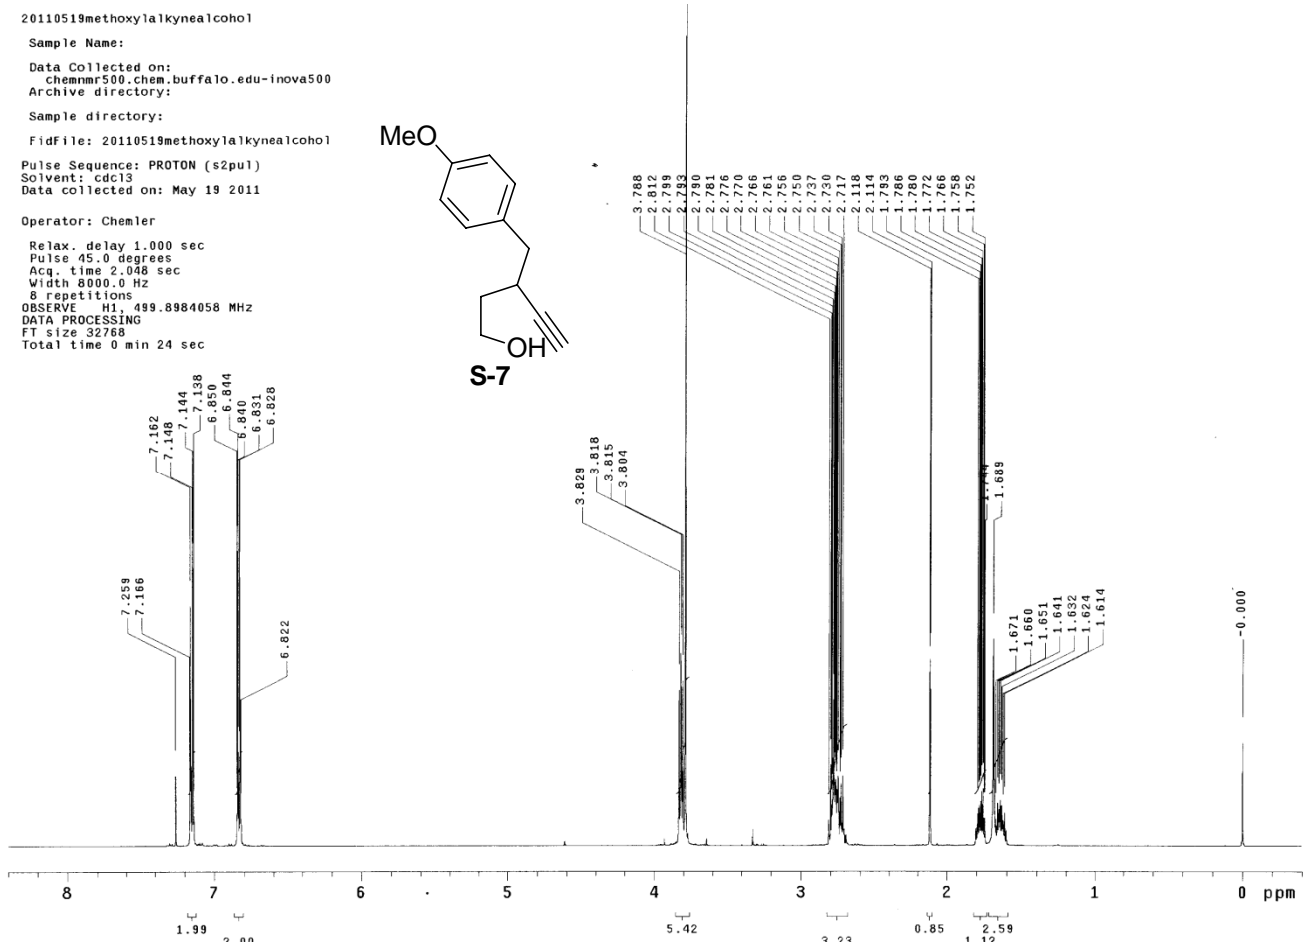

20110519methoxylalkynealcoholC13  
 Sample Name:  
 Data Collected on:  
 roesy.chem.buffalo.edu-mercury300  
 Archive directory:  
 Sample directory:  
 FidFile: CARBON  
 Pulse Sequence: CARBON (s2pu1)  
 Solvent: cdcl3  
 Data collected on: May 19 2011  
 Temp. 4.0 C / 277.1 K  
 Operator: Chemler  
 Relax. delay 1.000 sec  
 Pulse 45.0 degrees  
 Acq. time 0.368 sec  
 Width 18867.9 Hz  
 2048 repetitions  
 OBSERVE C13, 75.4536400 MHz  
 DECOUPLE H1, 300.0754430 MHz  
 Power 38 dB  
 continuously on  
 WALTZ-16 modulated  
 DATA PROCESSING  
 Line Broadening 0.5 Hz  
 FT size 32768  
 Total time 1 hr, 9 min

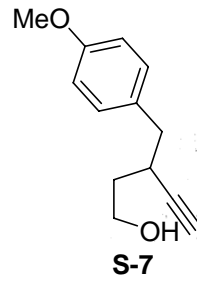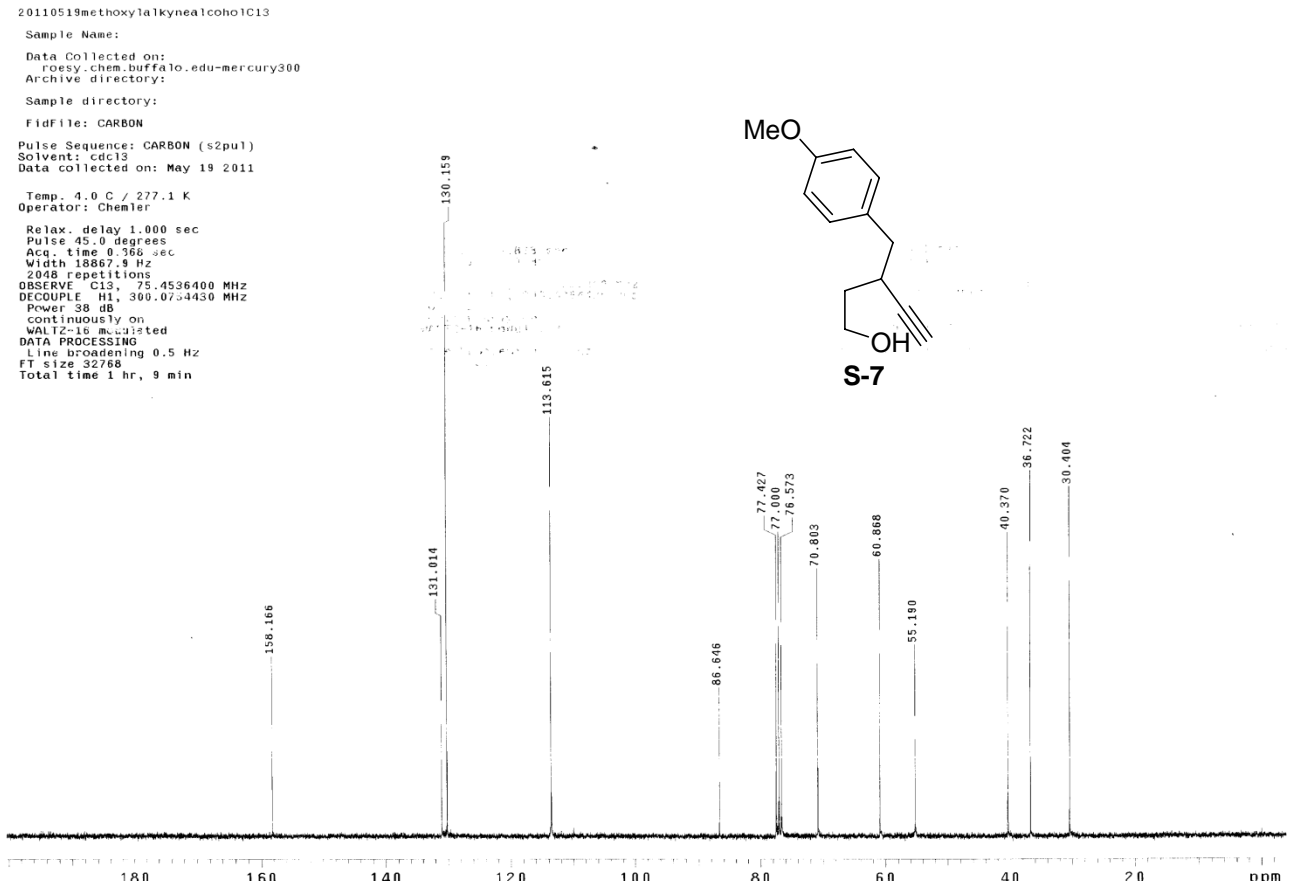

20110518methoxylalkyne0TBDPS

Sample Name:  
Data Collected on:  
Chemmr500.chem.buffalo.edu-inova500  
Archive directory:  
Sample directory:  
FidFile: PROTON

Pulse Sequence: PROTON (s2pul)  
Solvent: cdcl3  
Data collected on:  
Operator: Chemler  
Relax. delay 1.000 sec  
Pulse 45.0 degrees  
Acq. time 2.048 sec  
Width 8000.0 Hz  
8 repetitions  
OBSERVE H1, 499.8102 MHz  
DATA PROCESSING  
FT size 32768  
Total time 0 min 4 s c

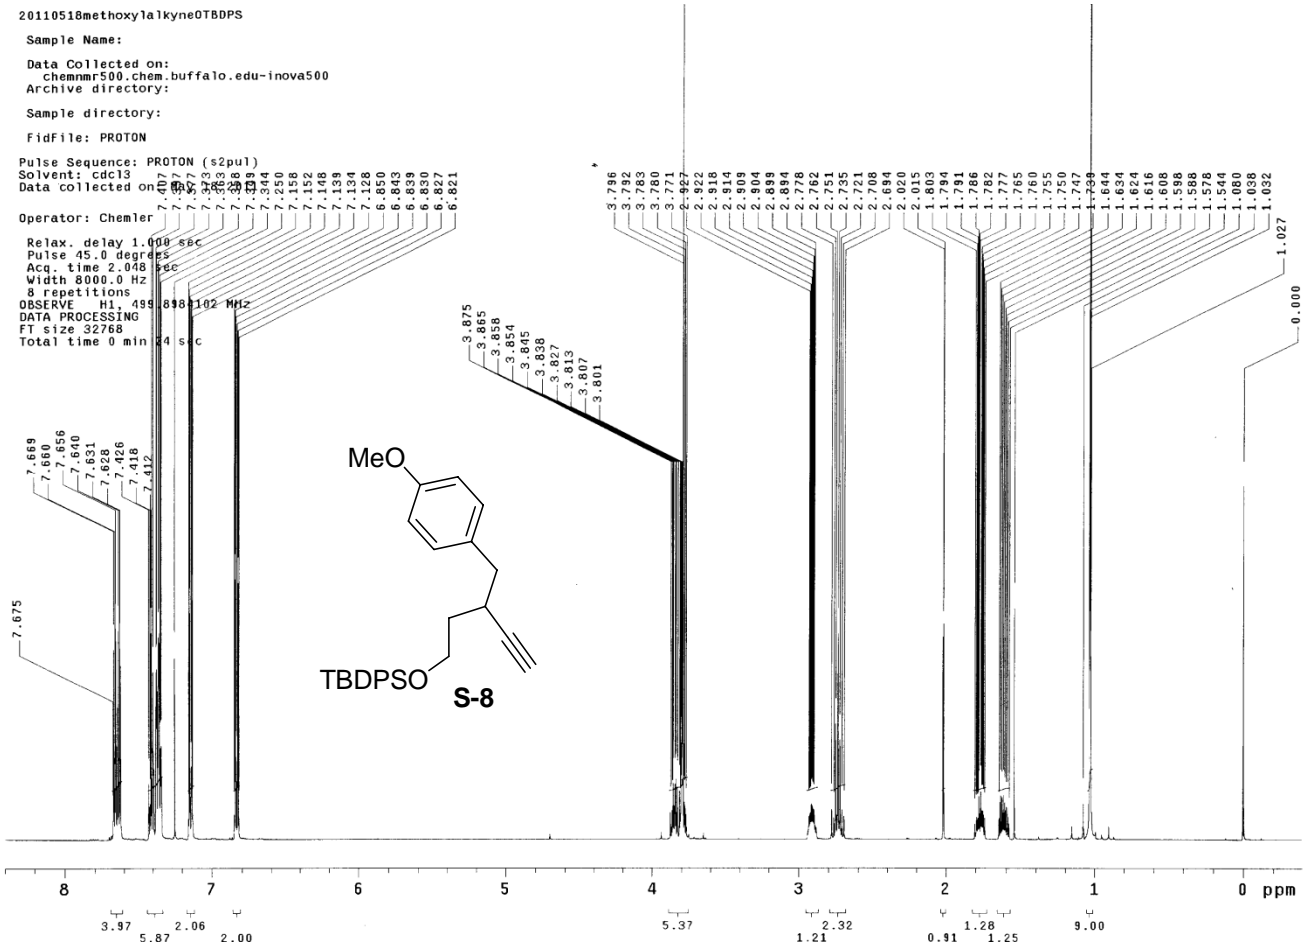

20110518methoxylalkyne0TBDPSC13

Sample Name:  
Data Collected on:  
roesy.chem.buffalo.edu-mercury300  
Archive directory:  
Sample directory:  
FidFile: CARBON

Pulse Sequence: CARBON (s2pul)  
Solvent: cdcl3  
Data collected on: May 18 2011  
Operator: Chemler  
Relax. delay 1.000 sec  
Pulse 45.0 degrees  
Acq. time 0.868 sec  
Width 18867.9 Hz  
1824 repetitions  
OBSERVE C13, 75.4536389 MHz  
DECOUPLE H1, 500.0754430 MHz  
Power 38 dB  
continuously on  
WALTZ-16 modulated  
DATA PROCESSING  
Line broadening 0.5 Hz  
FT size 32768  
Total time 1 hr, 9 min

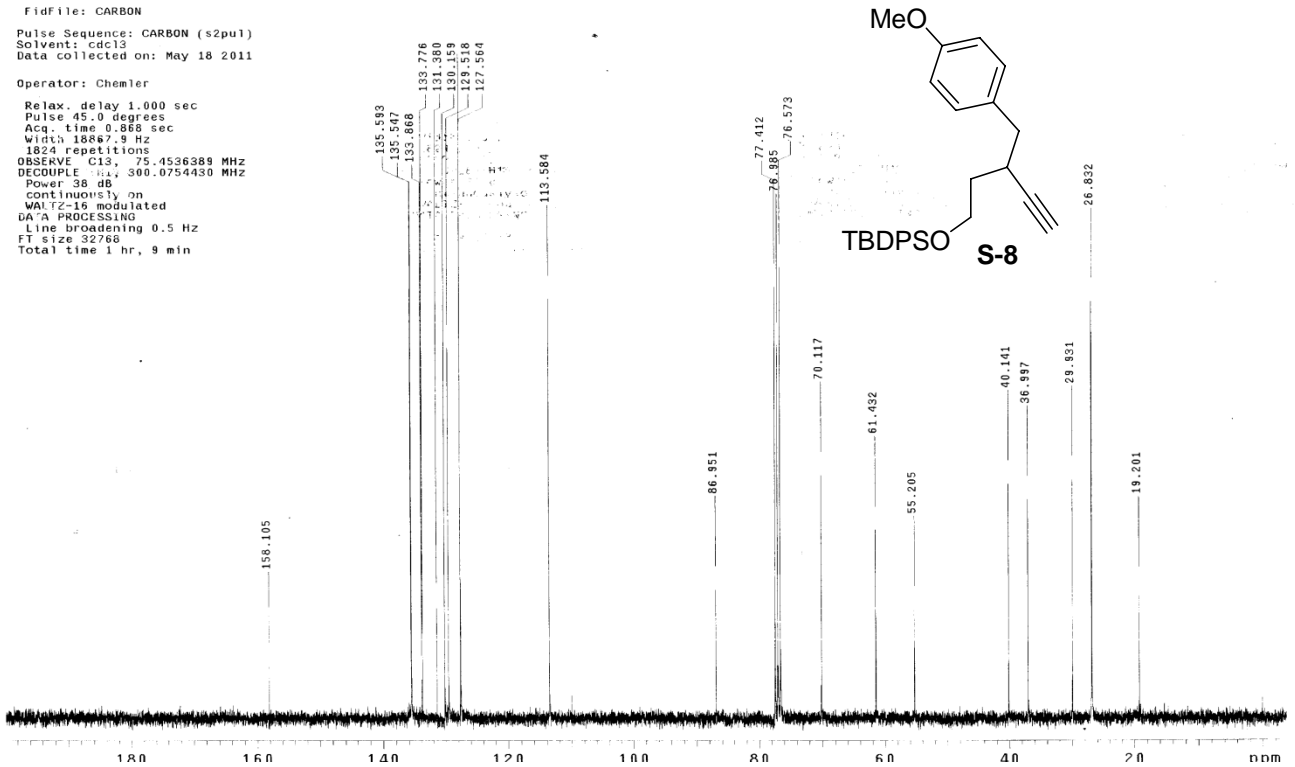



20110606methoxy1cisaikeneDalccoholsubstrate

Sample Name:  
 Data Collected on:  
 chemmr500.chem.buffalo.edu-inova500  
 Archive directory:  
 Sample directory:  
 FidFile: PROTON

Pulse Sequence: PROTON (s2pul)  
 Solvent: cdcl3  
 Data collected on: Jun 6 2011

Temp. 25.0 C / 298.1 K  
 Operator: Chemler

Relax. delay 1.000 sec  
 Pulse 45.0 degrees  
 Acq. time 2.048 sec  
 Width 8000.0 Hz  
 8 repetitions  
 OBSERVE H1, 499.898000 MHz  
 DATA PROCESSING  
 FT size 32768  
 Total time 0 min

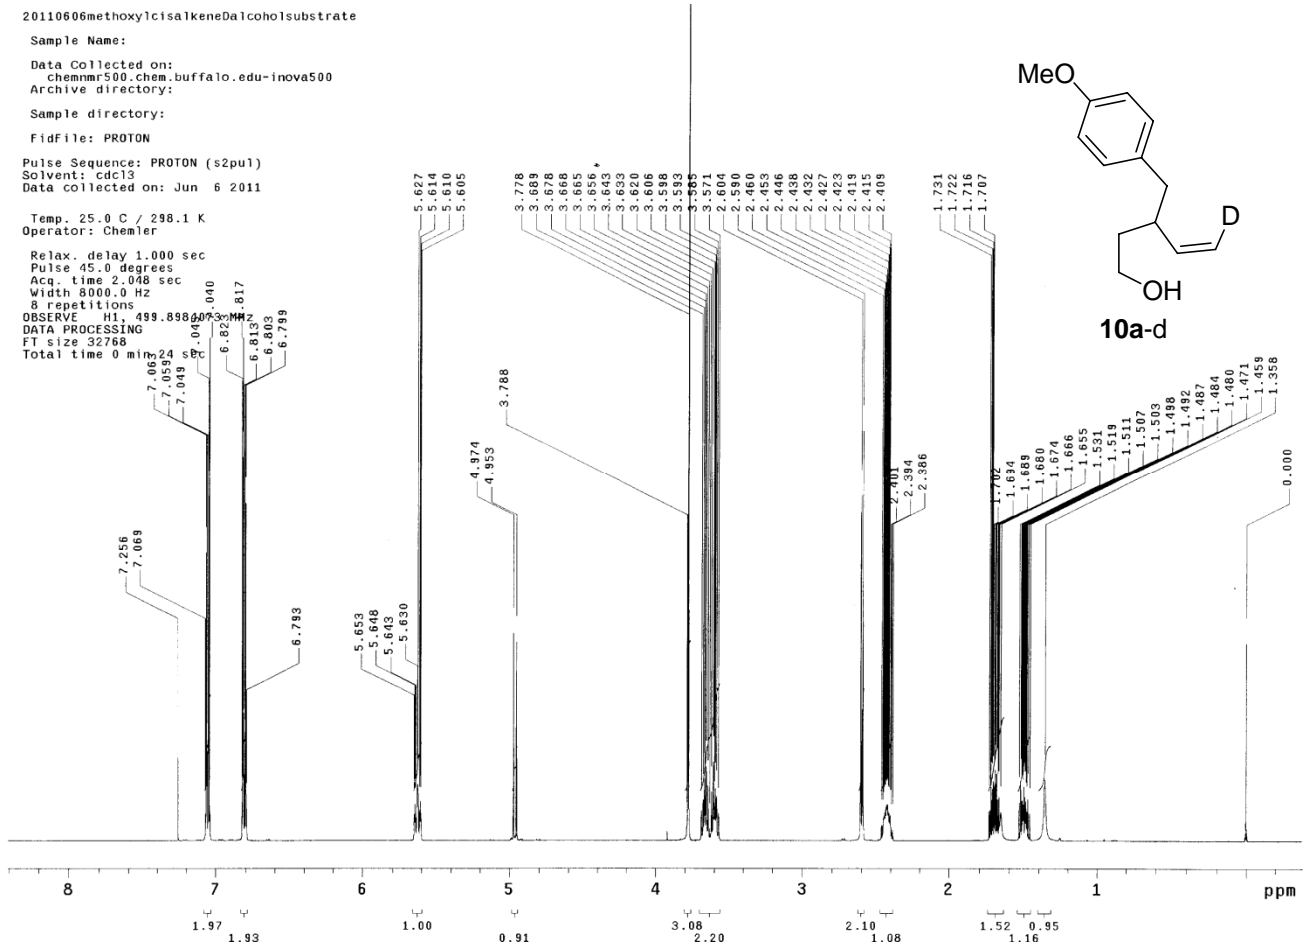

20110606methoxy1cisaikeneDalccoholsubstrateC13

Sample Name:  
 Data Collected on:  
 roesy.chem.buffalo.edu-mercury300  
 Archive directory:  
 Sample directory:  
 FidFile: CARBON

Pulse Sequence: CARBON (s2pul)  
 Solvent: cdcl3  
 Data collected on: Jun 6 2011

Temp. 25.0 C / 298.1 K  
 Operator: Chemler

Relax. delay 1.000 sec  
 Pulse 45.0 degrees  
 Acq. time 0.868 sec  
 Width 18867.9 Hz  
 3552 repetitions  
 OBSERVE C13, 75.4536400 MHz  
 DECOUPLE H1, 300.0754430 MHz  
 Power 38 dB  
 continuously on  
 WALTZ-16 modulated  
 DATA PROCESSING  
 Line broadening 0.5 Hz  
 FT size 32768  
 Total time 2 hr, 18 min

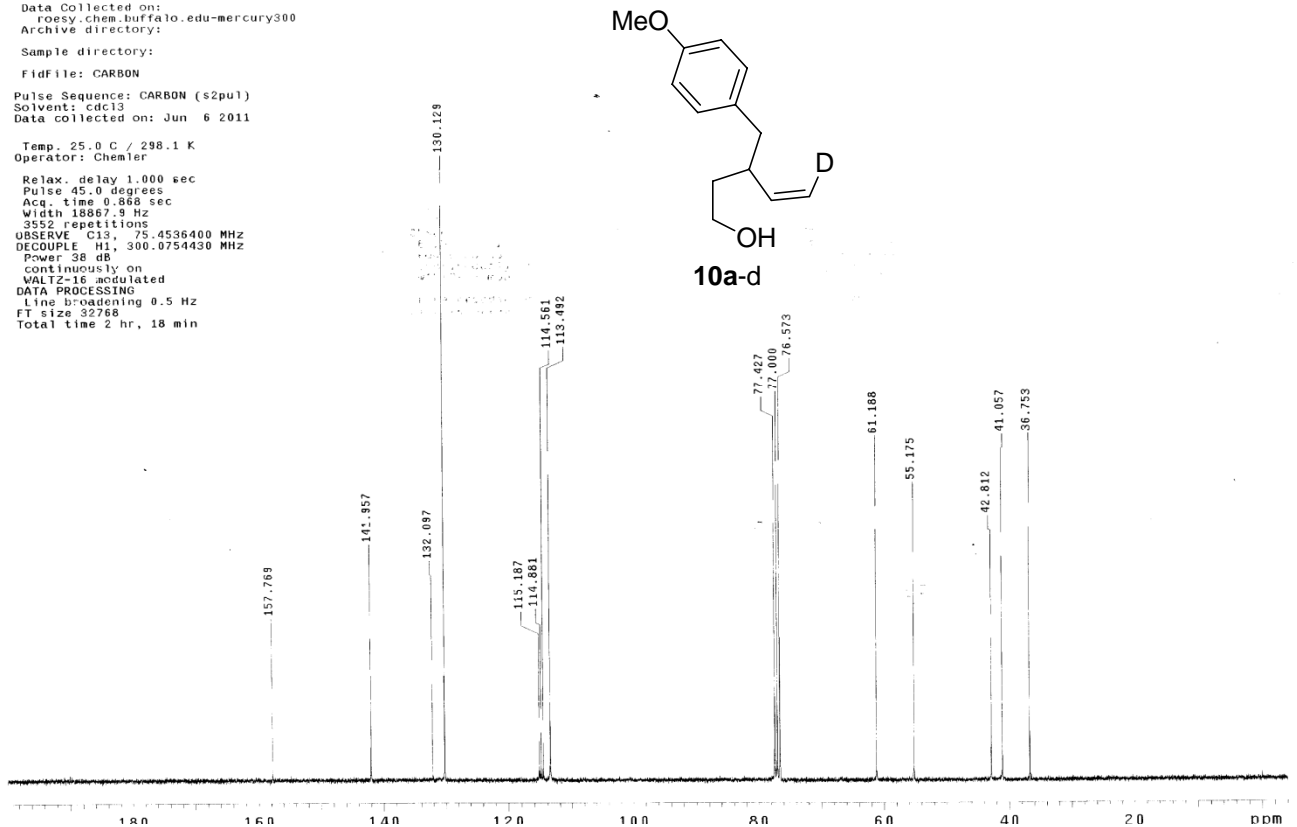

20110627dibenzylproduct3

Sample Name:

Data Collected on:  
chemmr500.chem.buffalo.edu-inova500  
Archive directory:

Sample directory:

FidFile: PROTON

Pulse Sequence: PROTON (s2pu1)  
Solvent: cdcl3  
Data collected on: 20110627  
Temp. 25.0 C / 298.1 K  
Operator: Chemler  
Relax. delay 3.000 sec  
Pulse 15.0 degrees  
Acq. time 2.048 sec  
Width 8000.0 Hz  
8 repetitions  
OBSERVE H1, 453.1364200 MHz  
DATA PROCESSING  
FT size 32768  
Total time 0 min 29 sec

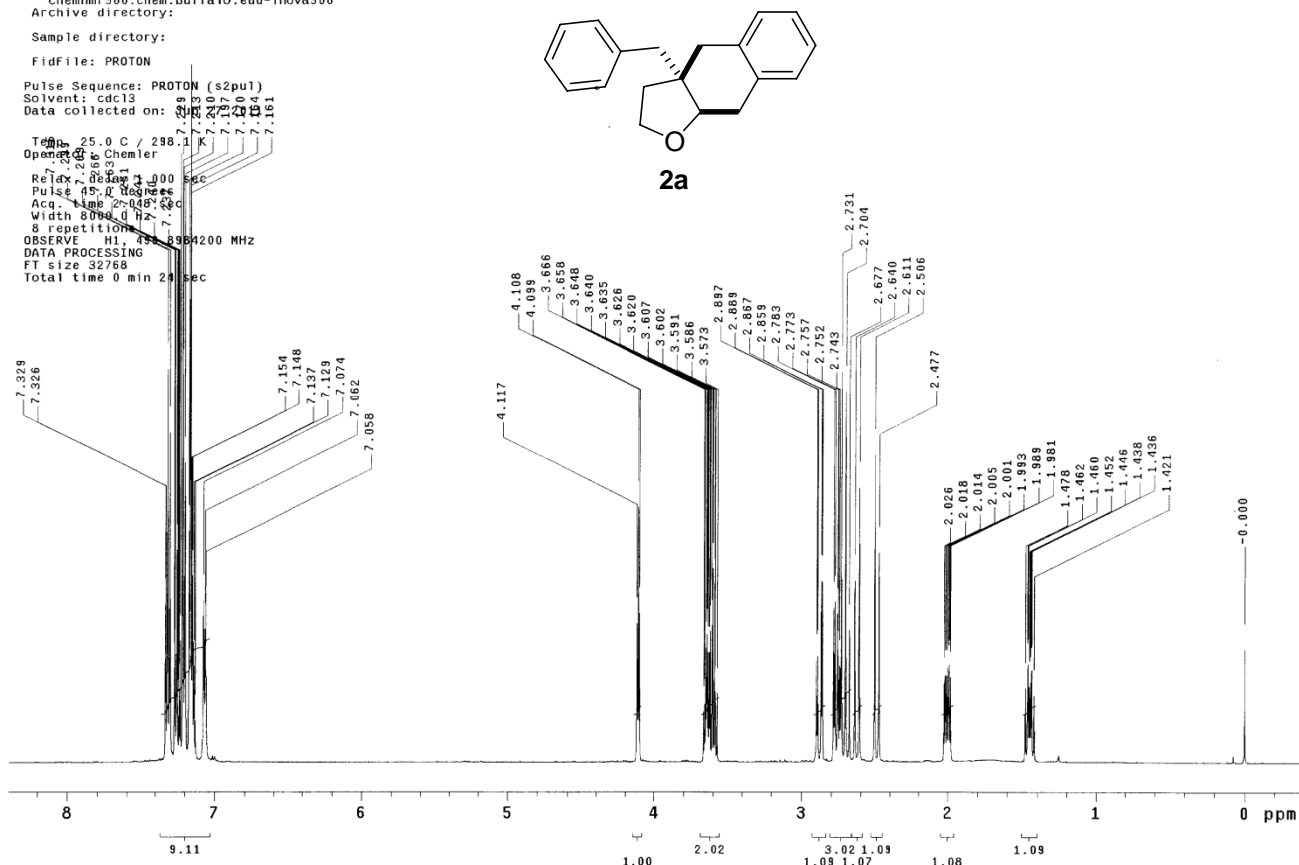

20110627dibenzylproductC13

Sample Name:

Data Collected on:  
roesy.chem.buffalo.edu-mercury300  
Archive directory:

Sample directory:

FidFile: CARBON

Pulse Sequence: CARBON (s2pu1)  
Solvent: cdcl3  
Data collected on: Jun 27 2011  
Temp. 25.0 C / 298.1 K  
Operator: Chemler  
Relax. delay 1.000 sec  
Pulse 45.0 degrees  
Acq. time 0.888 sec  
Width 18867.9 Hz  
376 repetitions  
OBSERVE C13, 75.4536423 MHz  
DECUPLE H1, 300.0754430 MHz  
Power 38 dB  
CONTINUOUSLY ON  
WALTZ-16 modulated  
DATA PROCESSING  
Line broadening, v.5 Hz  
FT size 32768  
Total time 2 hr, 18 min

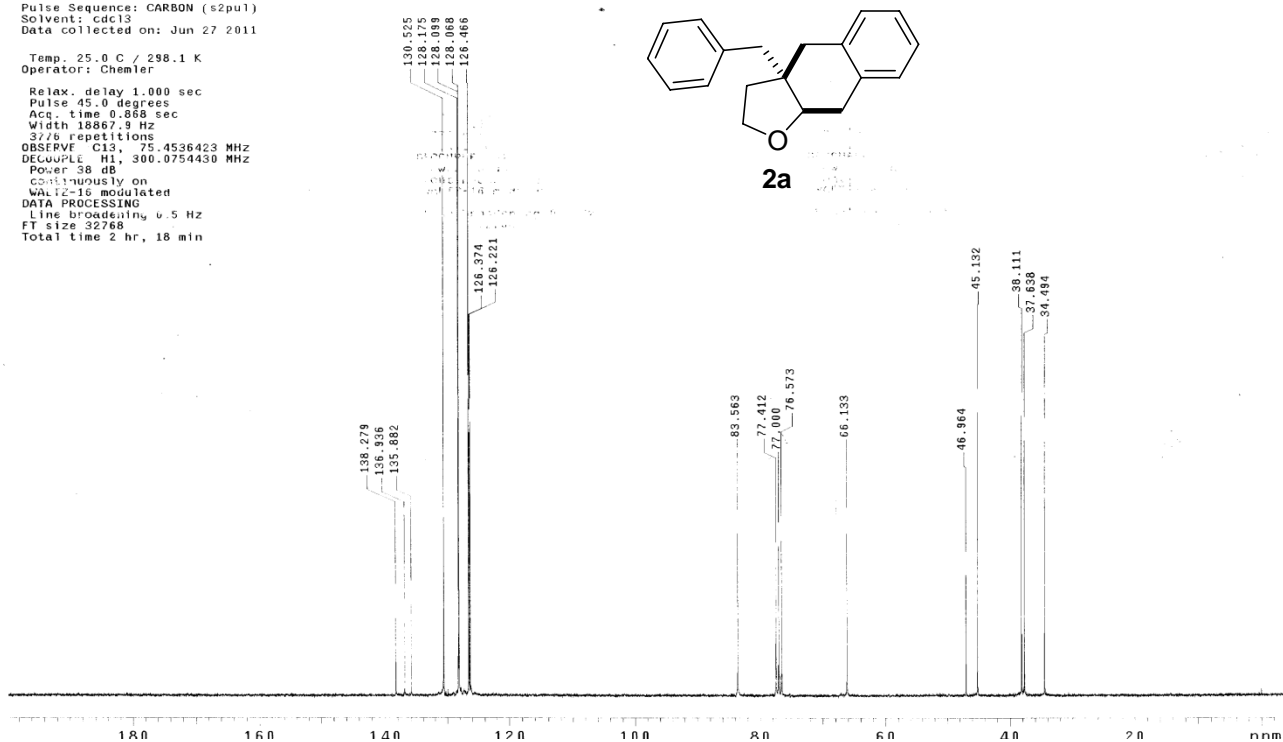

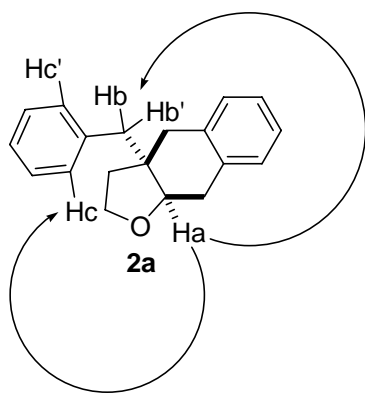

20110627dibenzylnoe1d

Sample Name:

Data Collected on:  
cncamr500.chm.buffalo.edu-inova500

Archive directory:

Sample directory:

FidFile: NOESY1D

Pulse Sequence: NOESY1D  
Solvent: cdc13  
Data collected on: Jun 27 2011

Temp. 25.0 C / 298.1 K  
Operator: Chemler

Relax. delay 1.000 sec  
Pulse 90.0 degrees  
Acq. time 1.866 sec  
Width 4388.8 Hz  
11264 repetitions  
OBSERVE F1 499.8963908 MHz  
DATA PROCESSING  
FT size 16384  
Total time 11 hr, 51 min

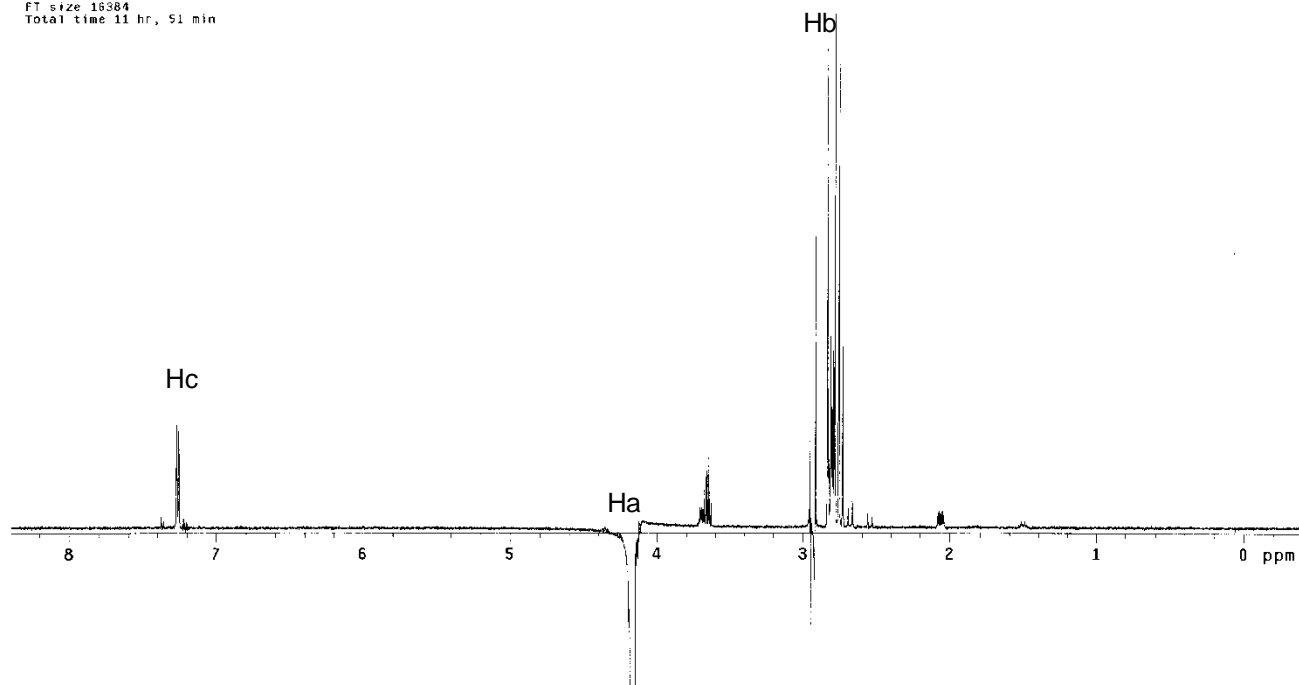

20110707dimethylproduct

Sample Name:  
 Data Collected on:  
 chemnmr500.chem.buffalo.edu-inova500  
 Archive directory:  
 Sample directory:  
 FidFile: PROTON

Pulse Sequence: PROTON (s2pu1)  
 Solvent: cdcl3  
 Data collected on: Jul 7 2011

Operator: Chemler  
 Relax. delay 1.000 sec  
 Pulse 45.0 degrees  
 Acq. time 2.048 sec  
 Width 8000.0 Hz  
 8 repetitions  
 OBSERVE H1, 499.898445 MHz  
 DATA PROCESSING  
 FT size 32768  
 Total time 0 min 24.7 sec

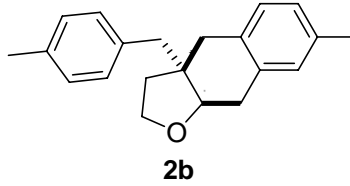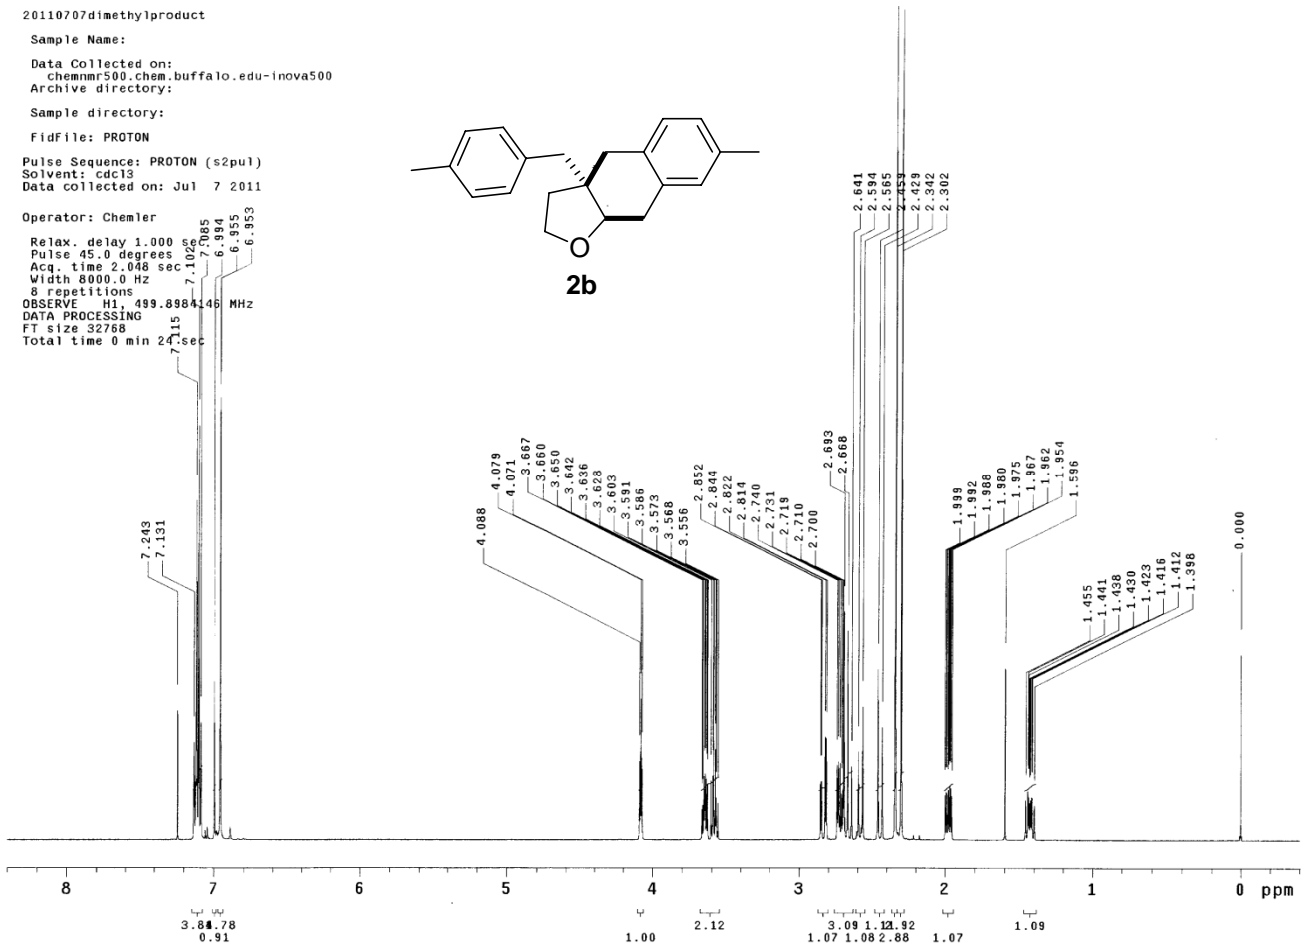

20110707dimethylproductC13

Sample Name:  
 Data Collected on:  
 roesy.chem.buffalo.edu-mercury300  
 Archive directory:  
 Sample directory:  
 FidFile: CARBON

Pulse Sequence: CARBON (s2pu1)  
 Solvent: cdcl3  
 Data collected on: Jul 7 2011

Operator: Chemler  
 Relax. delay 1.000 sec  
 Pulse 45.0 degrees  
 Acq. time 0.888 sec  
 Width 18867.9 Hz  
 4096 repetitions  
 OBSERVE C13, 75.4536400 MHz  
 DECOUPLE H1, 300.0754430 MHz  
 Power 38 dB  
 continuously on  
 WALTZ-16 modulated  
 DATA PROCESSING  
 Line broadening 0.5 Hz  
 FT size 32768  
 Total time 2 hr, 18 min

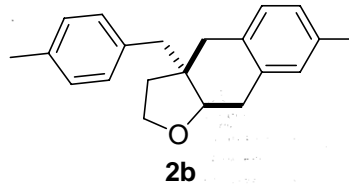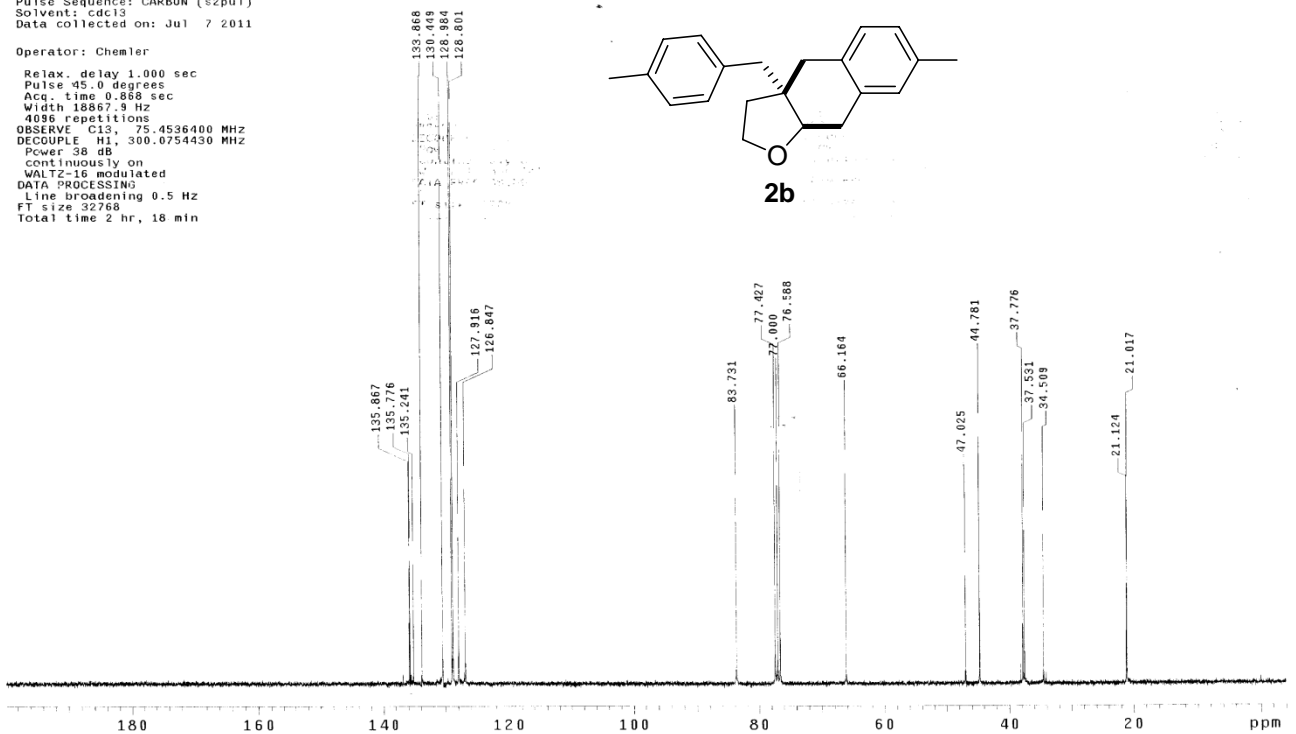



20110628dimethoxyproduct

Sample Name:  
 Data Collected on: chemmr500.chem.buffalo.edu-inova500  
 Archive directory:  
 Sample directory:  
 FidFile: PROTON

Pulse Sequence: PROTON (s2pu1)  
 Solvent: cdcl3  
 Data collected on: Jun 28 2011

Temp. 25.0 C / 298.1 K  
 Operator: Chemler

Relax. delay 1.000 sec  
 Pulse 45.0 degrees  
 Acq. time 2.348 sec  
 Width 8000.000 Hz  
 8 repetitions  
 OBSERVE H1, 499.999 MHz  
 DATA PROCESSING  
 FT size 32768  
 Total time 6 min 24 sec

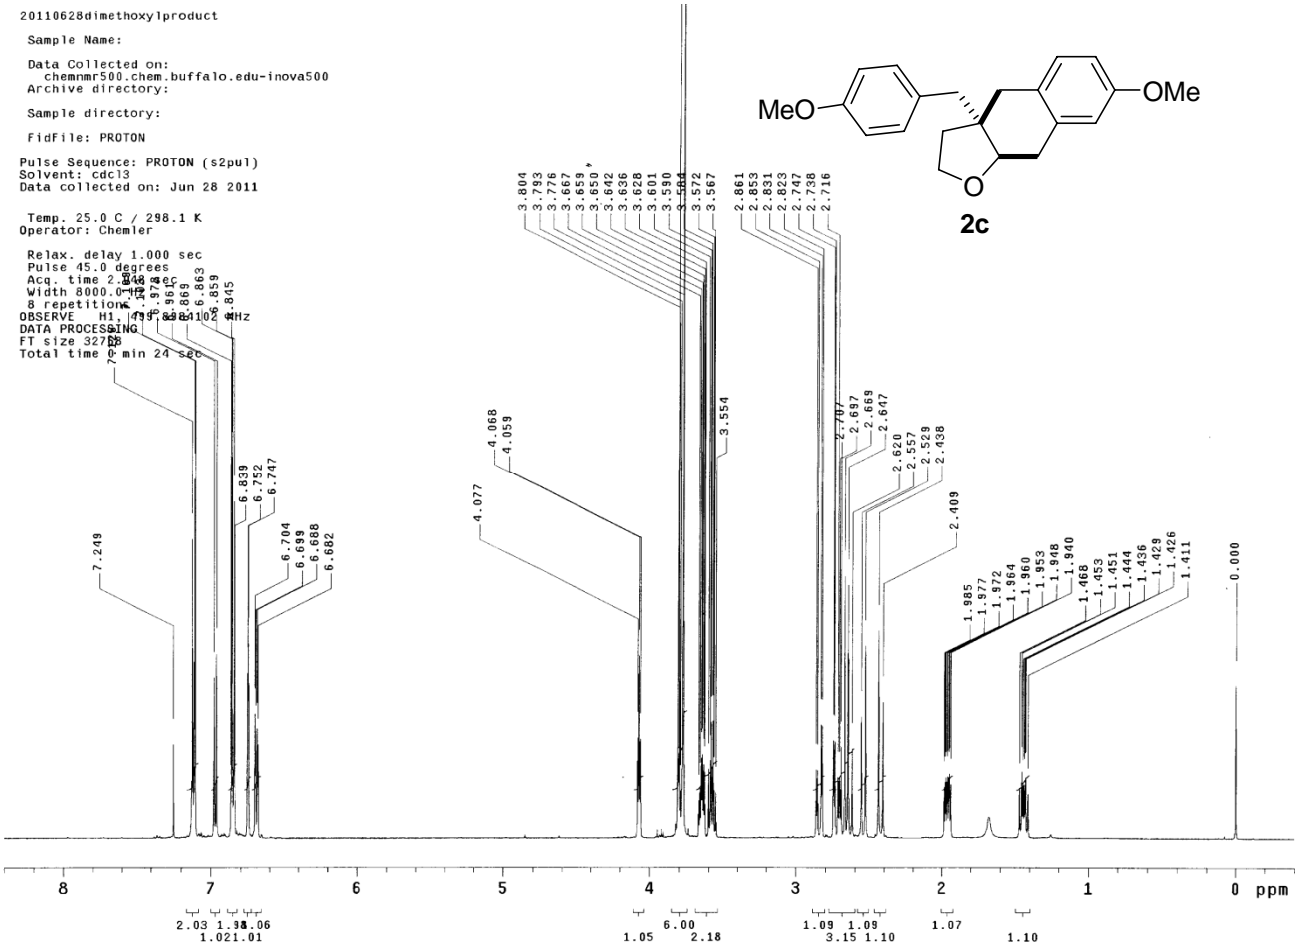

20110628dimethoxyproductC13

Sample Name:  
 Data Collected on: roesy.chem.buffalo.edu-mercury300  
 Archive directory:  
 Sample directory:  
 FidFile: CARBON

Pulse Sequence: CARBON (s2pu1)  
 Solvent: cdcl3  
 Data collected on: Jun 28 2011

Temp. 25.0 C / 298.1 K  
 Operator: Chemler

Relax. delay 1.000 sec  
 Pulse 45.0 degrees  
 Acq. time 0.868 sec  
 Width 18867.9 Hz  
 3872 repetitions  
 OBSERVE C13, 75.4536400 MHz  
 DECOUPLE H1, 300.0754430 MHz  
 Power 38 db  
 continuously on  
 WALTZ-16 modulated  
 DATA PROCESSING  
 Line broadening 0.5 Hz  
 FT size 32768  
 Total time 2 hr, 18 min

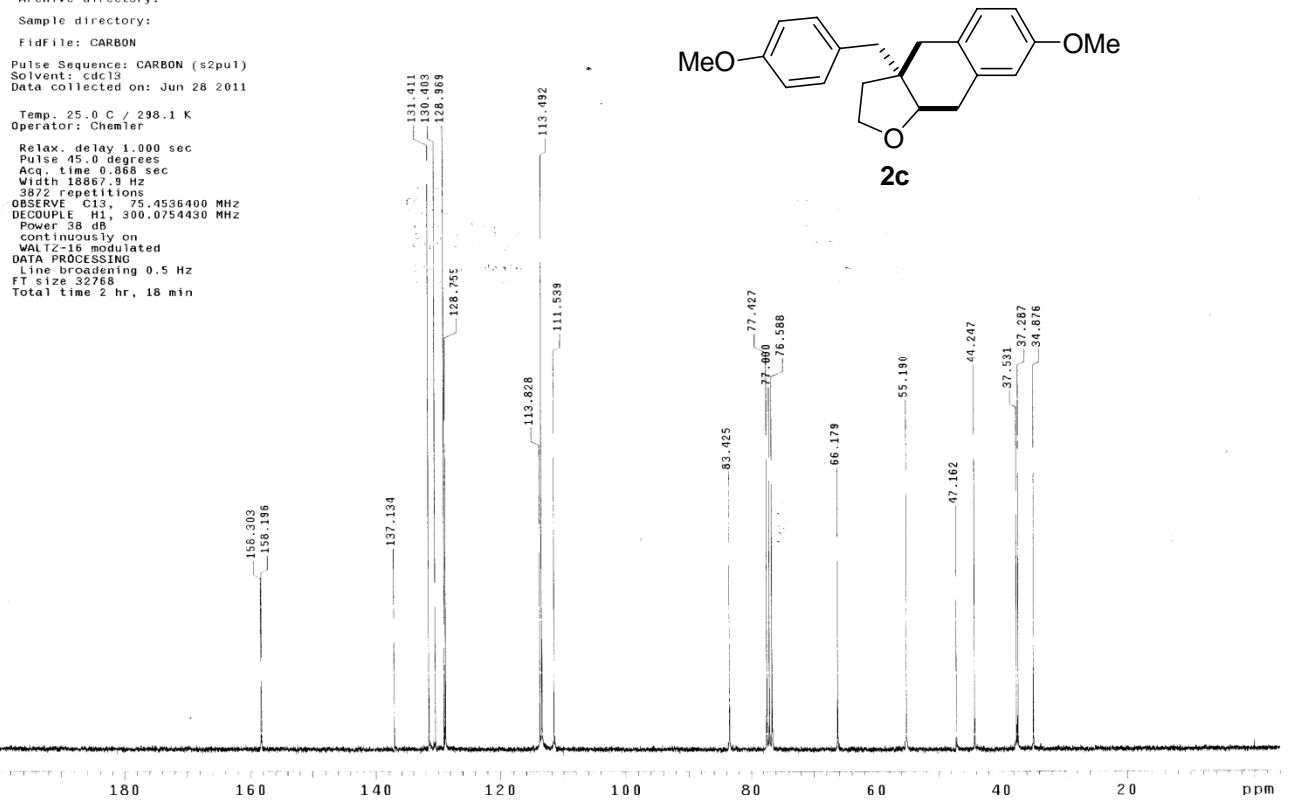

20110706dithiomethylproduct3

Sample Name:

Data Collected on:  
chemmr500.chem.buffalo.edu-inova500  
Archive directory:

Sample directory:

FidFile: PROTON

Pulse Sequence: PROTON (s2pu1)  
Solvent: cdc13  
Data collected on: Jul 6 2011

Operator: Chemler

Relax. delay 1.000 sec  
Pulse 45.0 degrees  
Acq. time 2.048 sec  
Width 8000.0 Hz  
8 repetitions  
OBSERVE H1, 499.94063 MHz  
DATA PROCESSING  
FT size 32768  
Total time 0 min 24 sec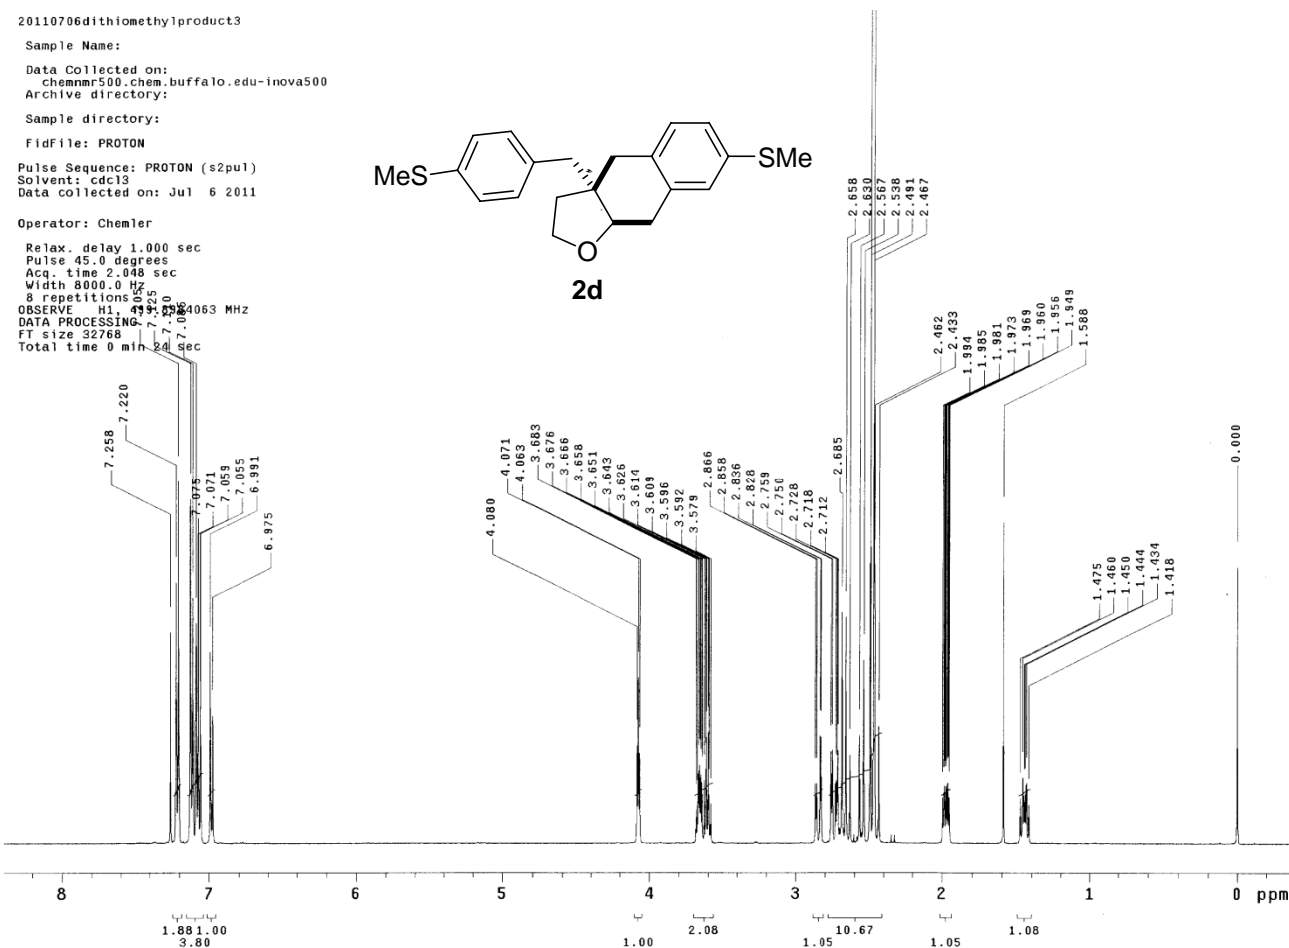

20110706dithiomethylproduct13

Sample Name:

Data Collected on:  
roesy.chem.buffalo.edu-mercury300  
Archive directory:

Sample directory:

FidFile: CARBON

Pulse Sequence: CARBON (s2pu1)  
Solvent: cdc13  
Data collected on: Jul 6 2011Temp. 25.0 C / 298.1 K  
Operator: ChemlerRelax. delay 1.000 sec  
Pulse 45.0 degrees  
Acq. time 0.868 sec  
Width 18867.9 Hz  
4000 repetitions  
OBSERVE C13, 75.4536400 MHz  
DECOUPLE H1, 300.0754430 MHz  
Power 38 db  
continuously on  
WALTZ-16 modulated  
DATA PROCESSING  
Line broadening 0.5 Hz  
FT size 32768  
Total time 5 hr, 47 min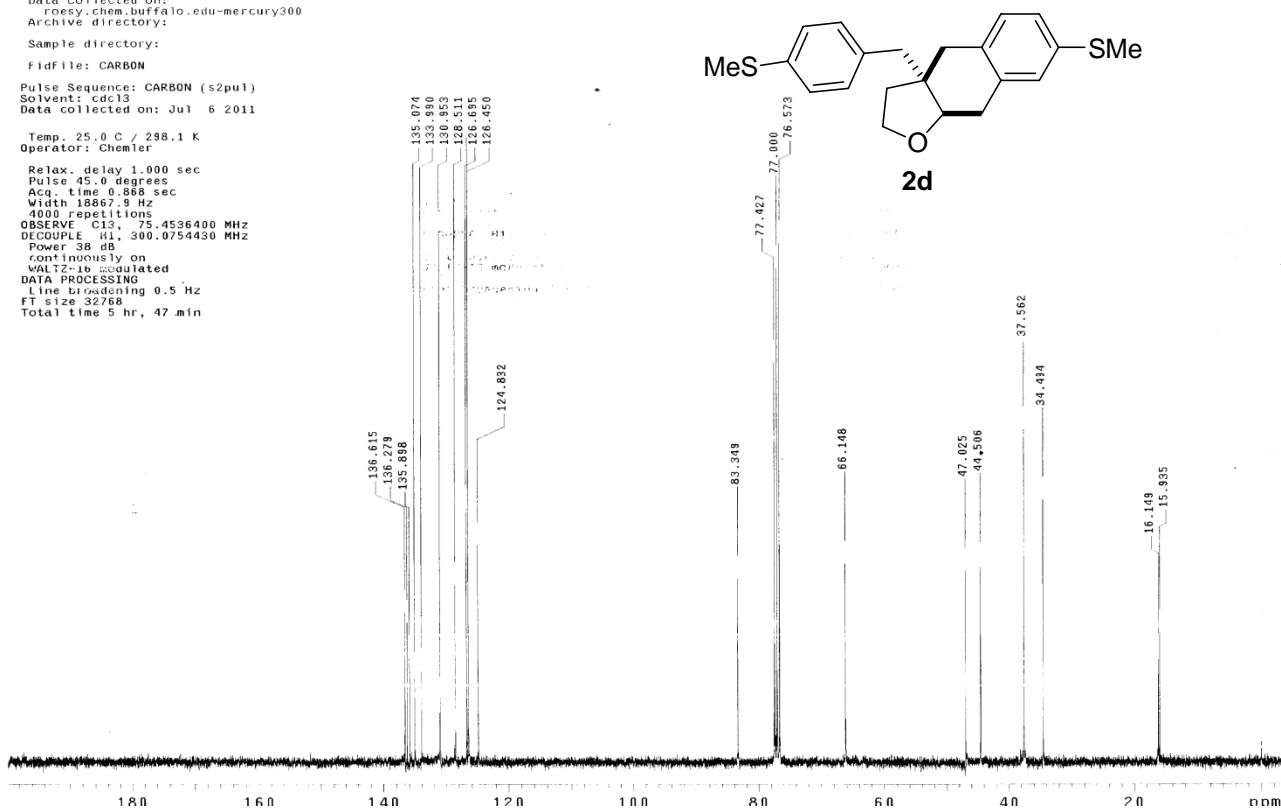

20110705dibromoproduct

Sample Name:

Data Collected on:  
chemmar500.chem.buffalo.edu-inova500  
Archive directory:

Sample directory:

FidFile: PROTON

Pulse Sequence: PROTON (s2pul)

Solvent: cdcl3

Data collected on: Jul 5 2011

Operator: Chemler

Relax. delay 1.000 sec

Pulse 45.0 degrees

Acq. time 2.048 sec

Width 8000.0 Hz

8 repetitions

OBSERVE H1, 499.884078 MHz

DATA PROCESSING

FT size 32768

Total time 0 min 24 sec

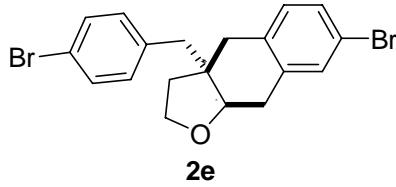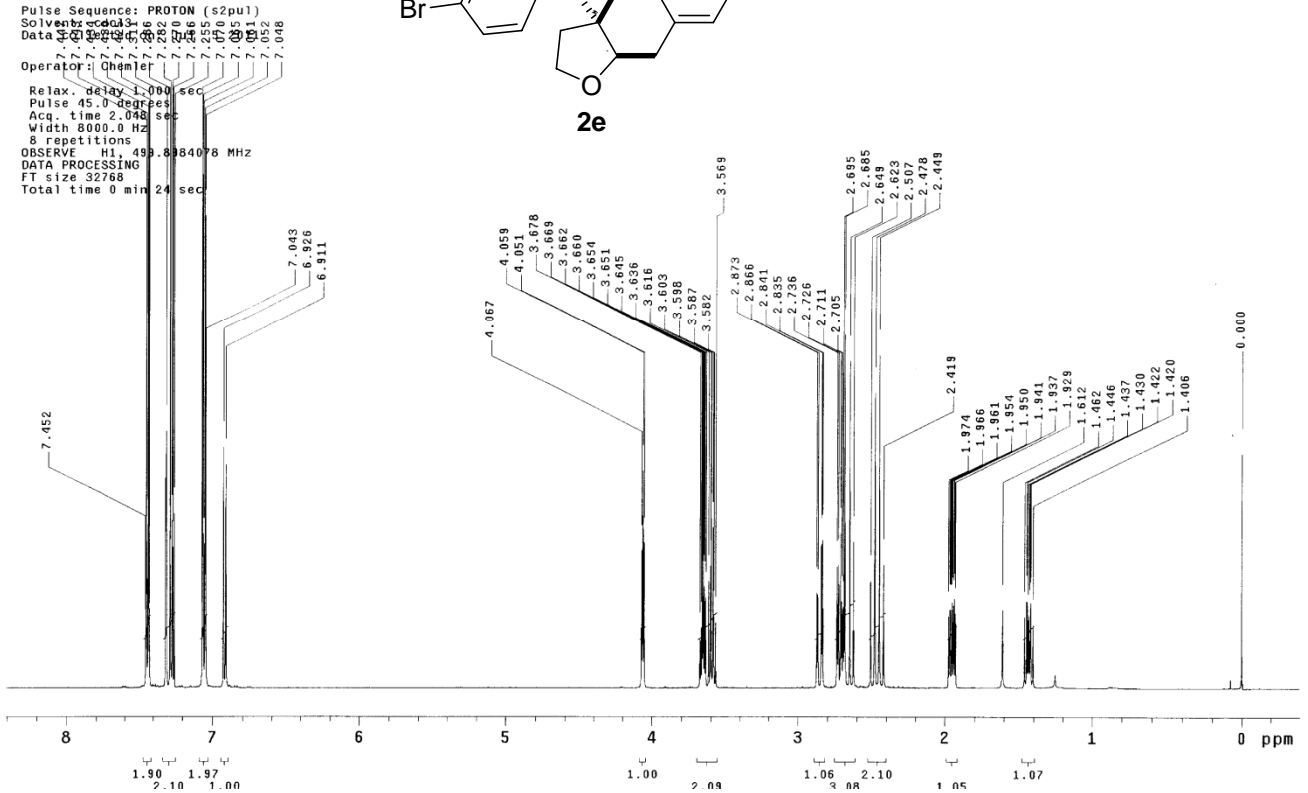

20110705dibromoproductC13

Sample Name:

Data Collected on:  
roesy.chem.buffalo.edu-mercury300  
Archive directory:

Sample directory:

FidFile: CARBON

Pulse Sequence: CARBON (s2pul)

Solvent: cdcl3

Data collected on: Jul 5 2011

Temp. 25.0 C / 298.1 K

Operator: Chemler

Relax. delay 1.000 sec

Pulse 45.0 degrees

Acq. time 0.868 sec

Width 18867.9 Hz

2016 repetitions

OBSERVE C13, 75.4536412 MHz

DECOUPLE H1, 300.0754430 MHz

Power 38 dB

continuously on

WALTZ-16 modulated

DATA PROCESSING

Line broadening 0.5 Hz

FT size 32768

Total time 2 hr, 18 min

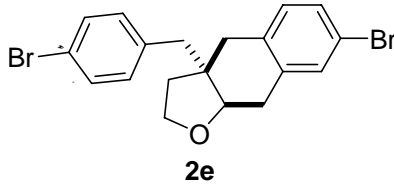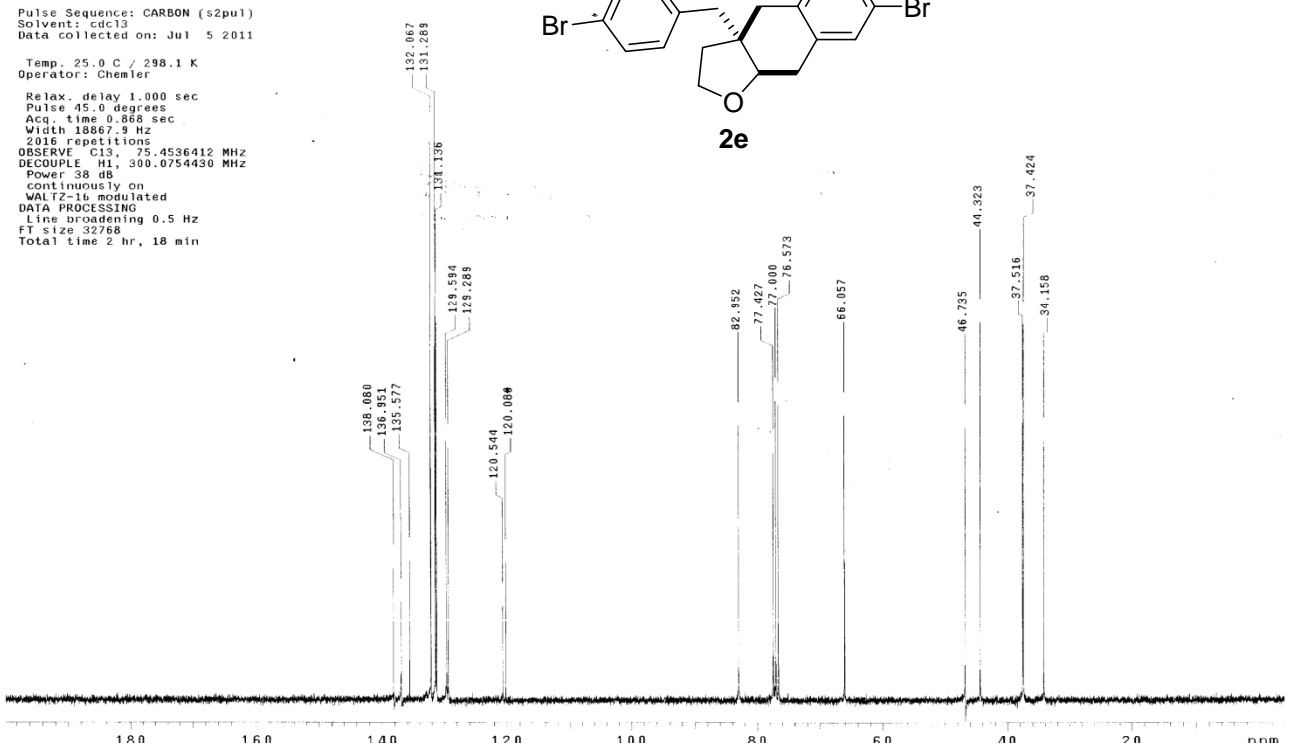

20110704dichloroproduct

Sample Name:

Data Collected on:  
chemmr500.chem.buffalo.edu-inova500

Archive directory:

Sample directory:

FidFile: PROTON

Pulse Sequence: PROTON (s2pu1)  
Solvent: cdcl3  
Data collected on: Jul 4 2011

Operator: Chemler

Relax. delay: 4.00 sec

Pulse: 45.0 degrees

Acq. time: 2.943 sec

Width: 8000.0 Hz

8 repetitions

OBSERVE: 499.8867078 MHz

DATA PROCESSING

FT size: 32768

Total time: 0 min 24 sec

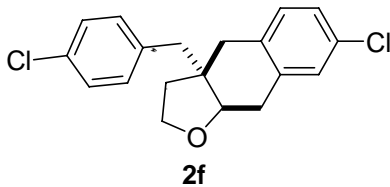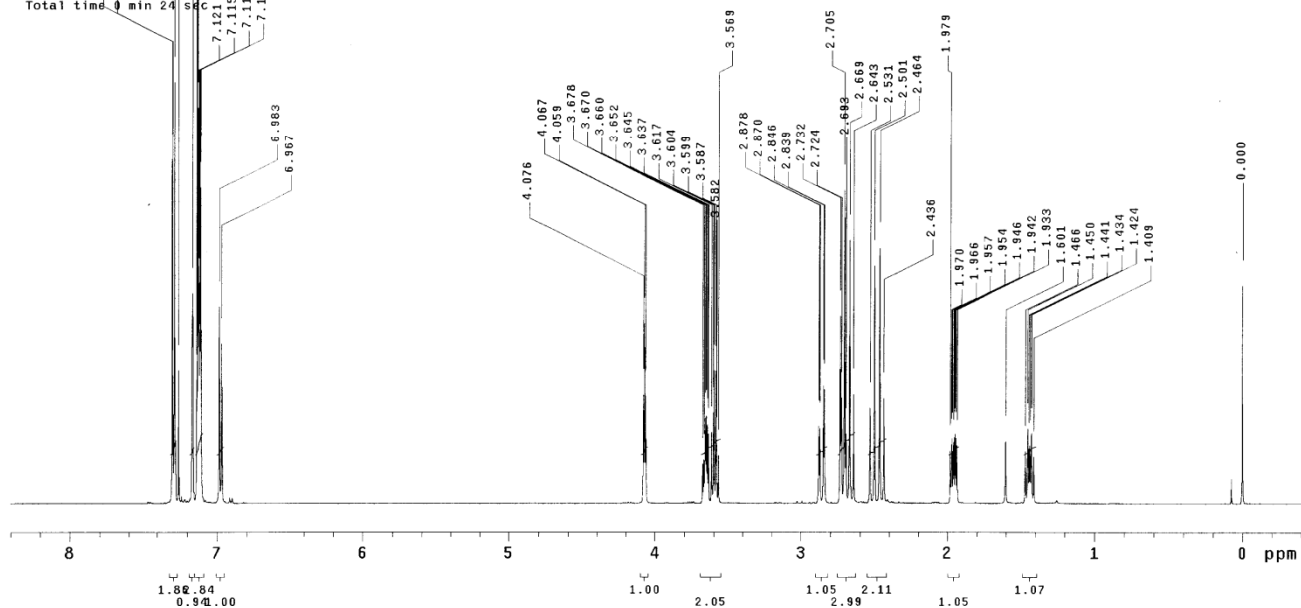

20110704dichloroproductC13

Sample Name:

Data Collected on:  
roessy.chem.buffalo.edu-mercury300

Archive directory:

Sample directory:

FidFile: CARBON

Pulse Sequence: CARBON (s2pu1)  
Solvent: cdcl3  
Data collected on: Jul 4 2011

Temp: 25.0 C / 298.1 K

Operator: Chemler

Relax. delay: 1.000 sec

Pulse: 45.0 degrees

Acq. time: 0.868 sec

Width: 18867.9 Hz

3392 repetitions

OBSERVE: C13, 75.4536400 MHz

DECOUPLE: H1, 300.0754430 MHz

Power: 38 dB

continuously on

WALTZ-16 modulated

DATA PROCESSING

Line broadening: 0.5 Hz

FT size: 32768

Total time: 2 hr, 18 min

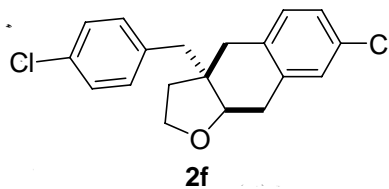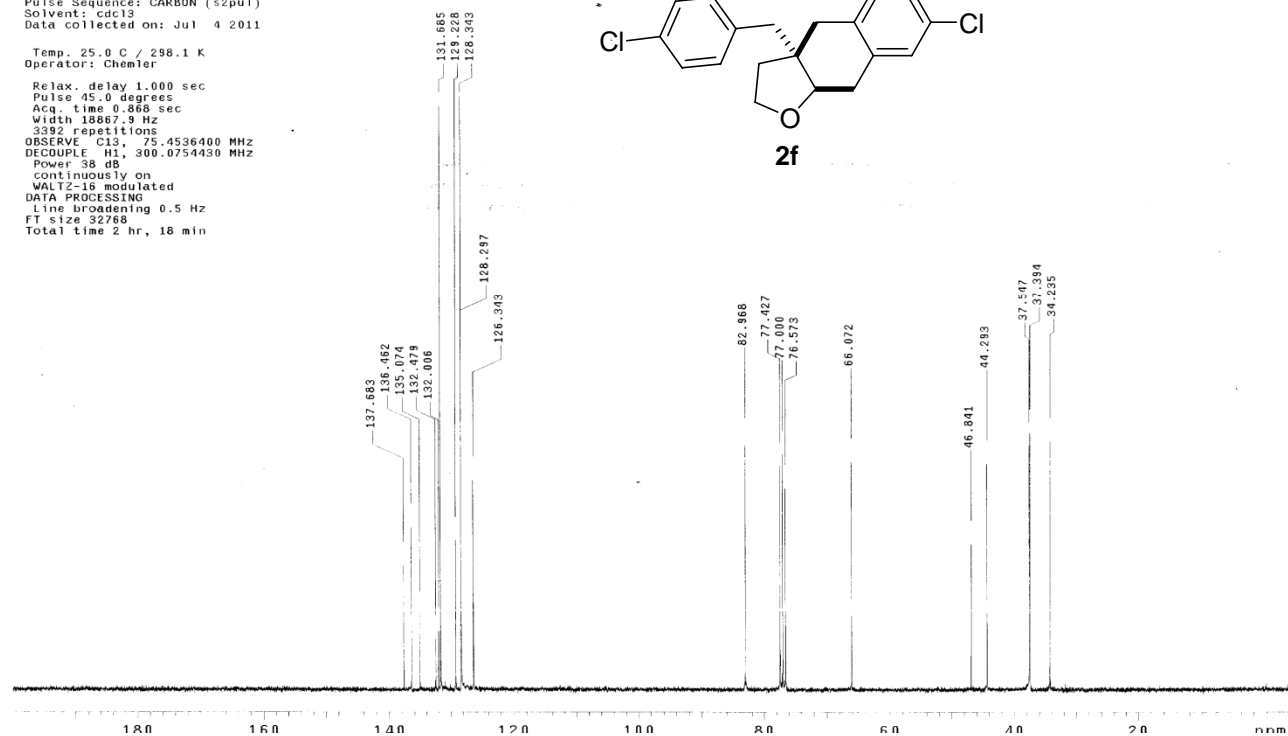

20110701difluoroproduct

Sample Name:

Data Collected on:  
chemmr500.chem.buffalo.edu-inova500  
Archive directory:

Sample directory:

FidFile: PROTON

Pulse Sequence: PROTON (s2pu1)  
Solvent: cdcl3  
Data collected on: Jul 1 2011

Operator: Chemler

Relax. delay 1.000 sec  
Pulse 45.0 degrees  
Acq. time 2.048 sec  
Width 8000.0 Hz  
8 repetitions  
OBSERVE H1, 499.8984078 MHz  
DATA PROCESSING  
FT size 32768  
Total time 0 min 24 sec

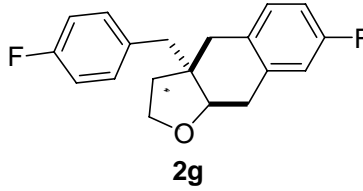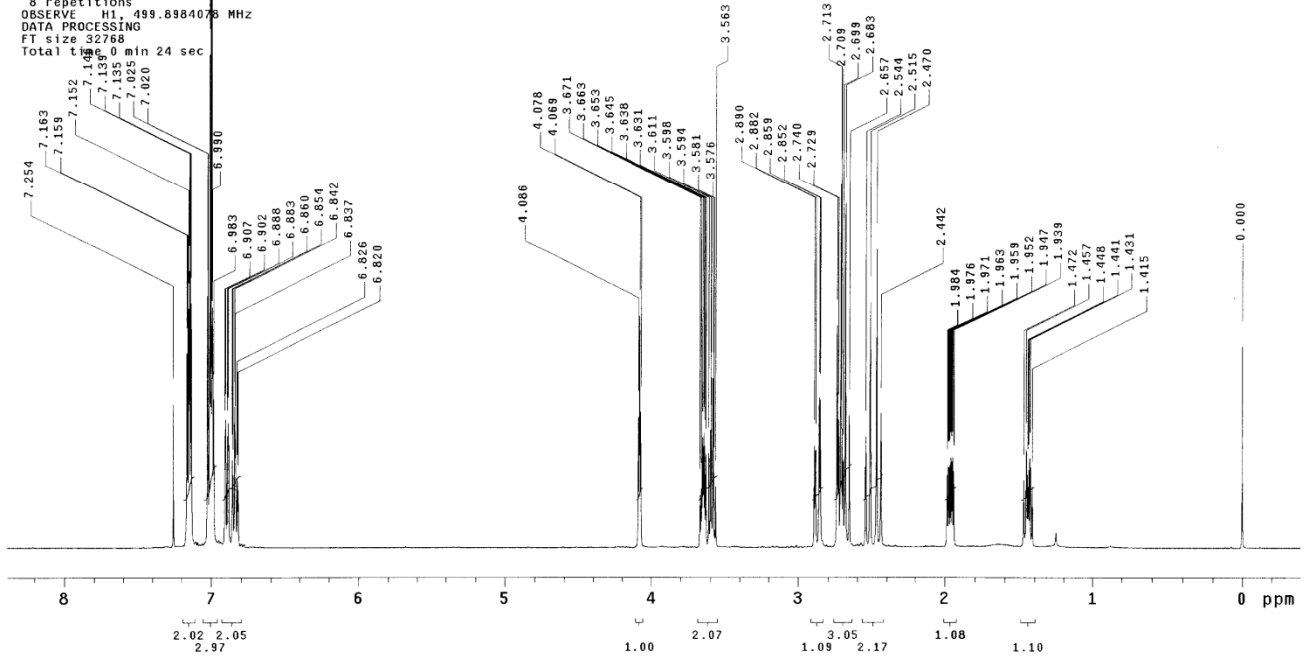

20110701difluoroproductC13

Sample Name:

Data Collected on:  
roesy.chem.buffalo.edu-mercury300  
Archive directory:

Sample directory:

FidFile: CARBON

Pulse Sequence: CARBON (s2pu1)  
Solvent: cdcl3  
Data collected on: Jul 1 2011

Temp. 25.0 C / 298.1 K  
Operator: Chemler

Relax. delay 1.000 sec  
Pulse 45.0 degrees  
Acq. time 0.868 sec  
Width 18867.9 Hz  
3800 repetitions  
OBSERVE C13, 75.4536400 MHz  
DECOUPLE H1, 300.0754430 MHz  
Power 38 dB  
continuously on  
WALTZ-16 modulated  
DATA PROCESSING  
Line broadening 0.5 Hz  
FT size 32768  
Total time 2 hr, 18 min

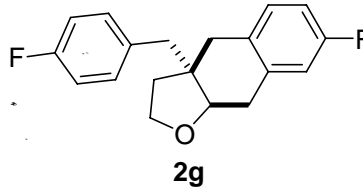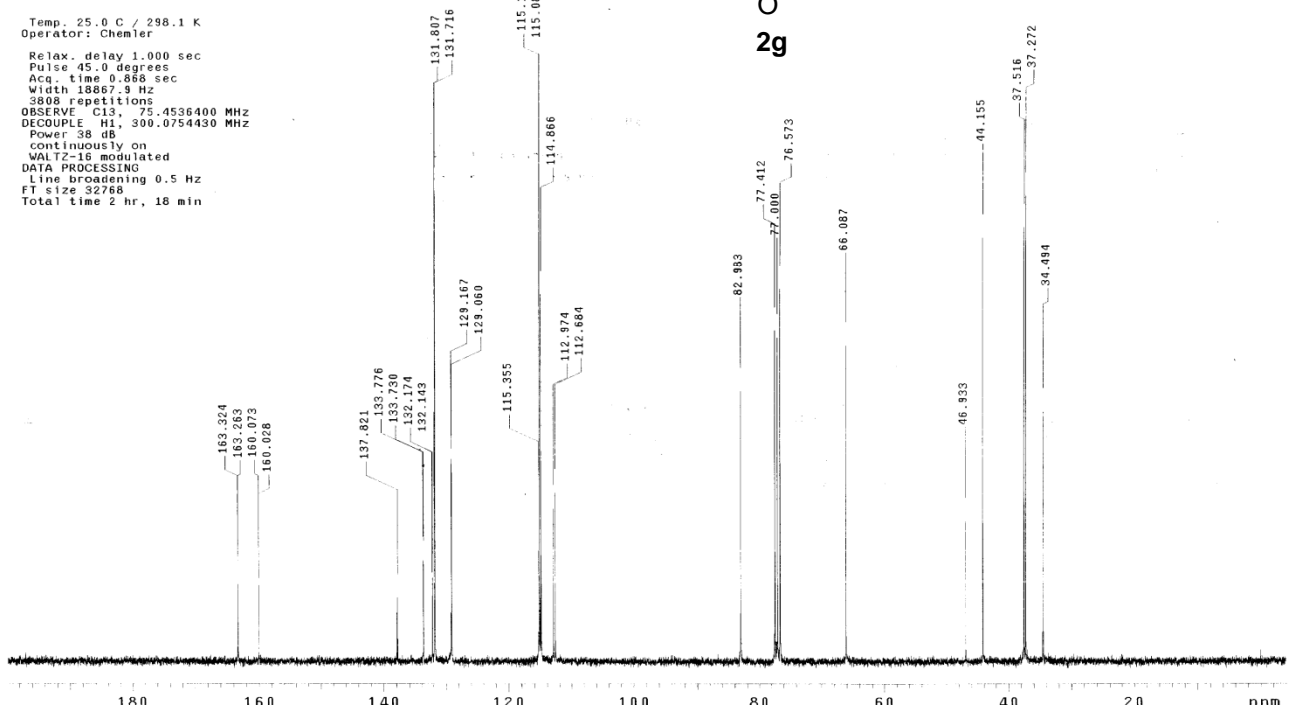

20110702dinitrifuoroproduct

Sample Name:  
 Data Collected on: chemmr500.chem.buffalo.edu-inova500  
 Archive directory:  
 Sample directory:  
 Fidfile: PROTON  
 Pulse Sequence: PROTON (s2pu1)  
 Solvent: cdcl3  
 Data collected on: Jul 2 2011

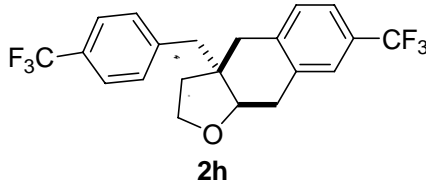

Operator: Chemler  
 Relax. delay 2.000 sec  
 Pulse 45.0 degrees  
 Acq. time 2.938 sec  
 Width 8000.0 Hz  
 8 repetitions  
 OBSERVE H1, 499.8984063 MHZ  
 DATA PROCESSING  
 FT size 32768  
 Total time 0 min 24 sec

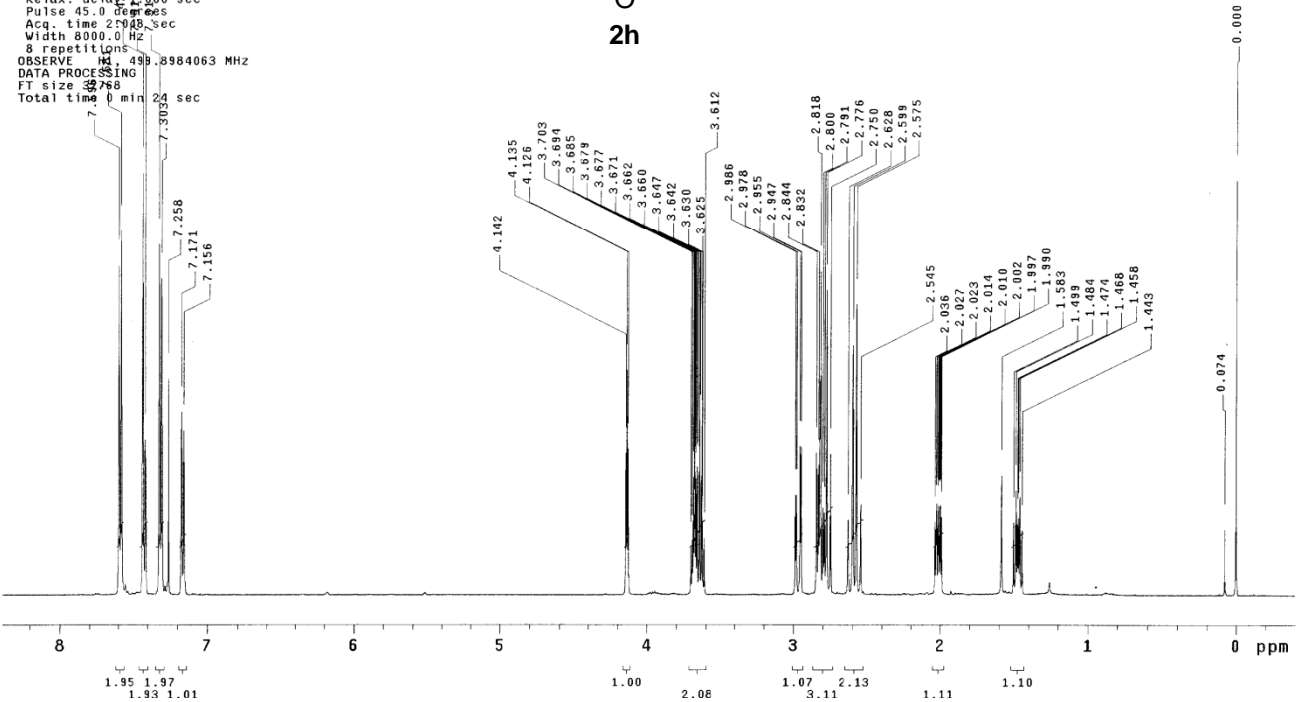

20110702dinitrifuoroproductC13

Sample Name:  
 Data Collected on: roesy.chem.buffalo.edu-mercury300  
 Archive directory:  
 Sample directory:  
 Fidfile: CARBON  
 Pulse Sequence: CARBON (s2pu1)  
 Solvent: cdcl3  
 Data collected on: Jul 2 2011

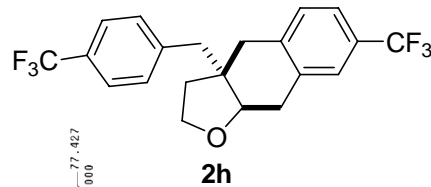

Temp. 25.0 C / 298.1 K  
 Operator: Chemler  
 Relax. delay 1.000 sec  
 Pulse 45.0 degrees  
 Acq. time 0.868 sec  
 Width 18867.9 Hz  
 2720 repetitions  
 OBSERVE C13, 75.4536377 MHZ  
 DECOUPLE H1, 300.0754430 MHZ  
 Power 38 dB  
 continuously on  
 WALTZ-16 modulated  
 DATA PROCESSING  
 line broadening 0.5 Hz  
 FT size 32768  
 Total time 2 hr, 18 min

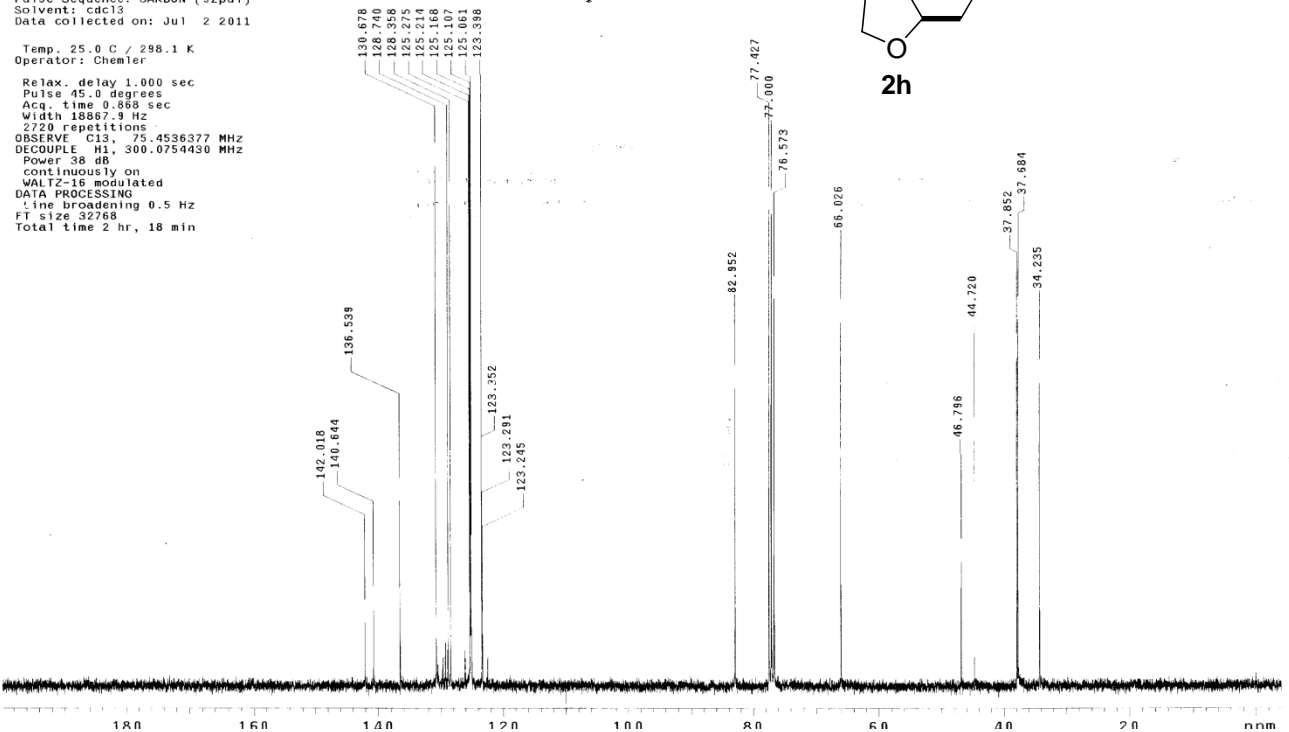

20110712d13methoxy1product1a

Sample Name:  
 Data Collected on:  
 Chemmr500.chem.buffalo.edu-inova500  
 Archive directory:  
 Sample directory:  
 FidFile: PROTON

Pulse Sequence: PROTON (s2pul)  
 Solvent: cdcl3  
 Data collected on: Jul 12 2011

Operator: Chemler  
 Relax. delay 1.000 sec  
 Pulse 45.0 degrees  
 Acq. time 2.048 sec  
 Width 8000.0 Hz  
 8 repetitions  
 OBSERVE H1, 499.8984146 MHz  
 DATA PROCESSING  
 FT size 32768  
 Total time 0 min 24 sec

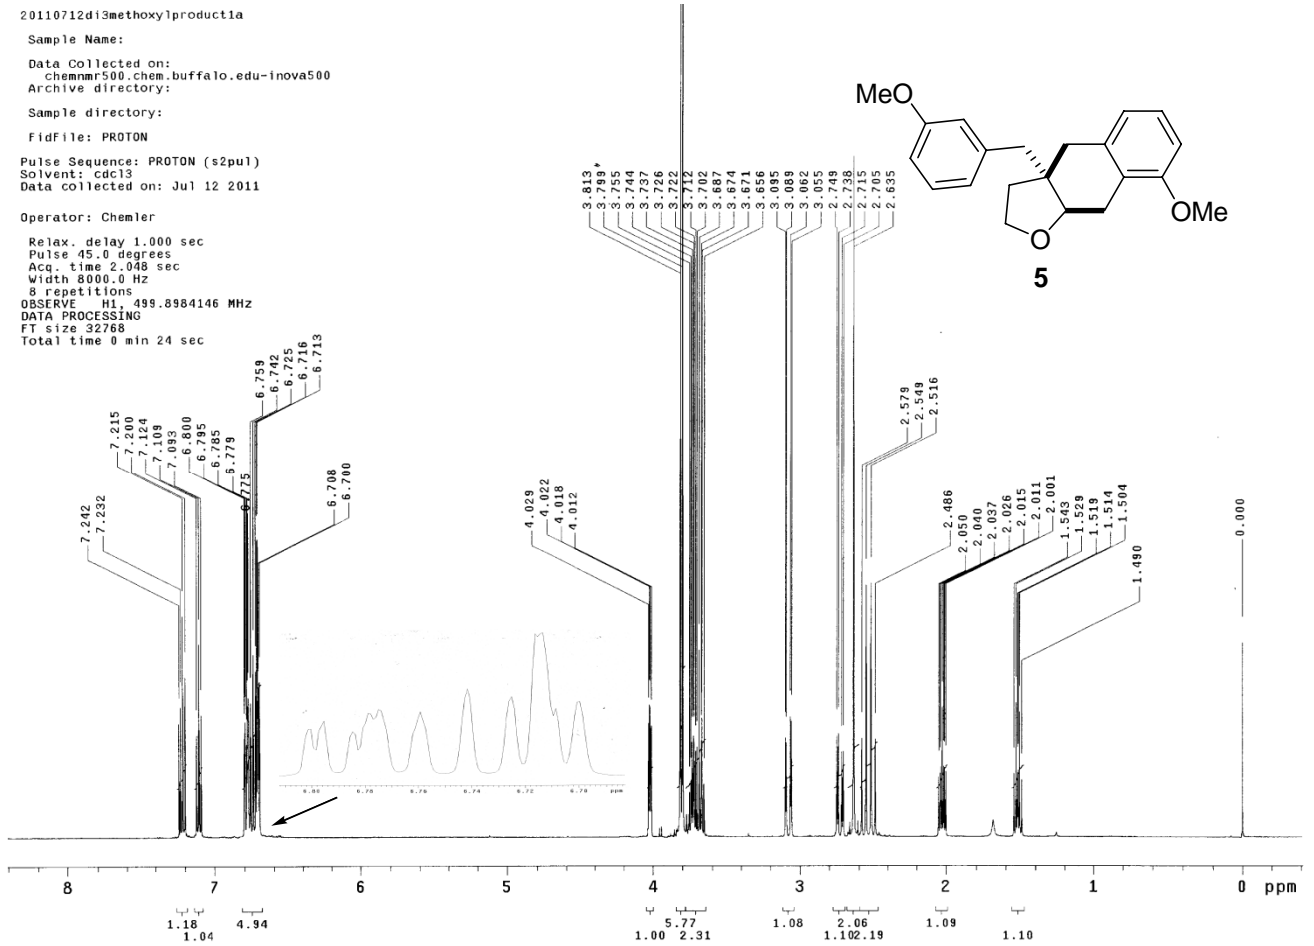

20110712d13methoxy1product1aC13

Sample Name:  
 Data Collected on:  
 coesy.chem.buffalo.edu-mercury300  
 Archive directory:  
 Sample directory:  
 FidFile: CARBON

Pulse Sequence: CARBON (s2pul)  
 Solvent: cdcl3  
 Data collected on: Jul 12 2011

Operator: Chemler  
 Relax. delay 1.000 sec  
 Pulse 45.0 degrees  
 Acq. time 0.868 sec  
 Width 18867.9 Hz  
 3840 repetitions  
 OBSERVE C13, 75.4536423 MHz  
 DECOUPLE H1, 300.0754430 MHz  
 Power 38 dB  
 continuously on  
 WALTZ-16 modulated  
 DATA PROCESSING  
 Line broadening 0.5 Hz  
 FT size 32768  
 Total time 2 hr, 18 min

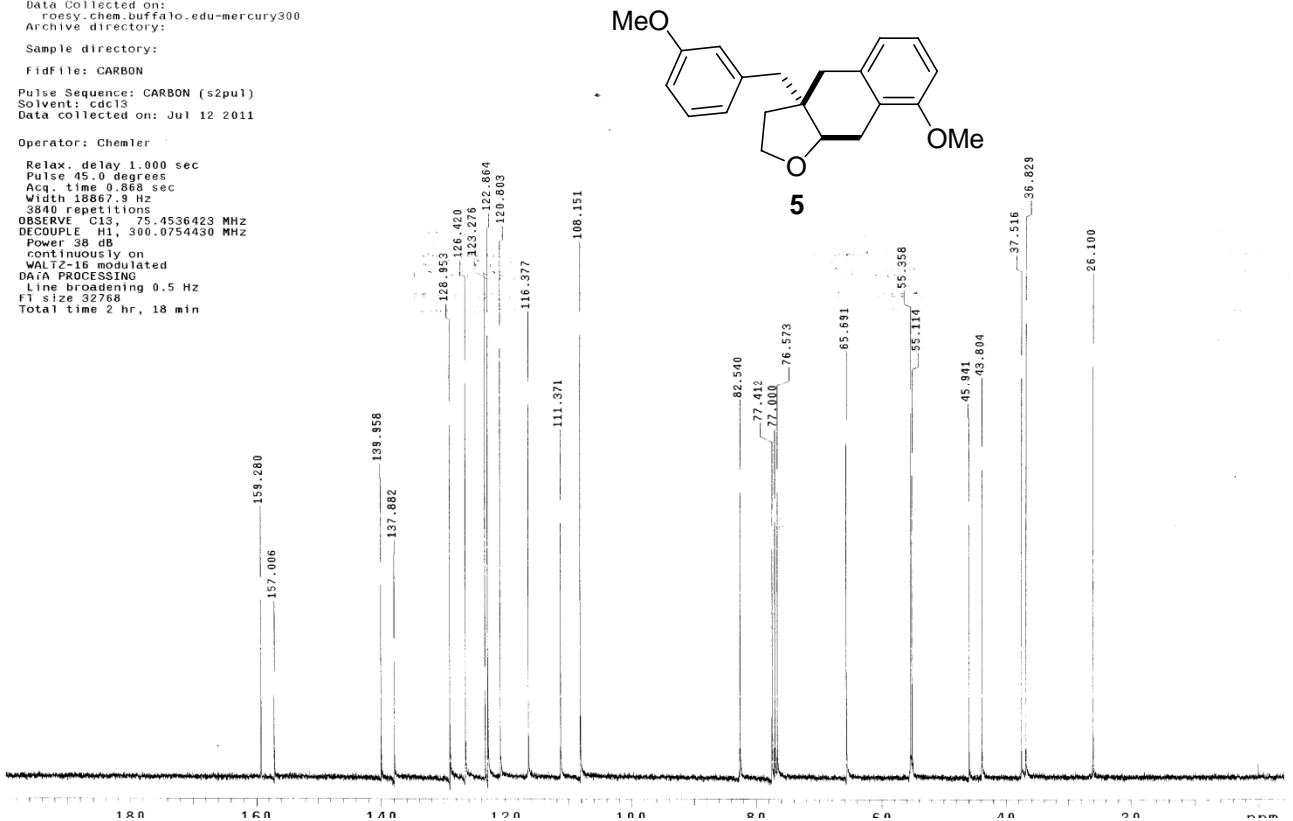

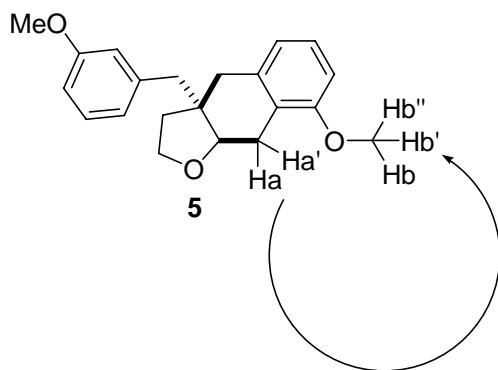

20110712di3methoxyproduct1ANDE  
 Selective band center: 3.13 (ppm); width: 35.0 (Hz)

Sample Name:

Data Collected on:  
 chemmr500.chem.buffalo.edu-inova500  
 Archive directory:

Sample directory:

FidFile: NOESY1D

Pulse Sequence: NOESY1D  
 Solvent: cdcl3  
 Data collected on: Jul 12 2011

Operator: Chemler

Relax. delay 1.000 sec  
 Pulse 50.0 degrees  
 Acq. time 1.859 sec  
 Width 4406.3 Hz  
 10752 repetitions  
 OBSERVE N1, 499.8963908 MHz  
 DATA PROCESSING  
 FT size 16384  
 Total time 10 hr, 54 min

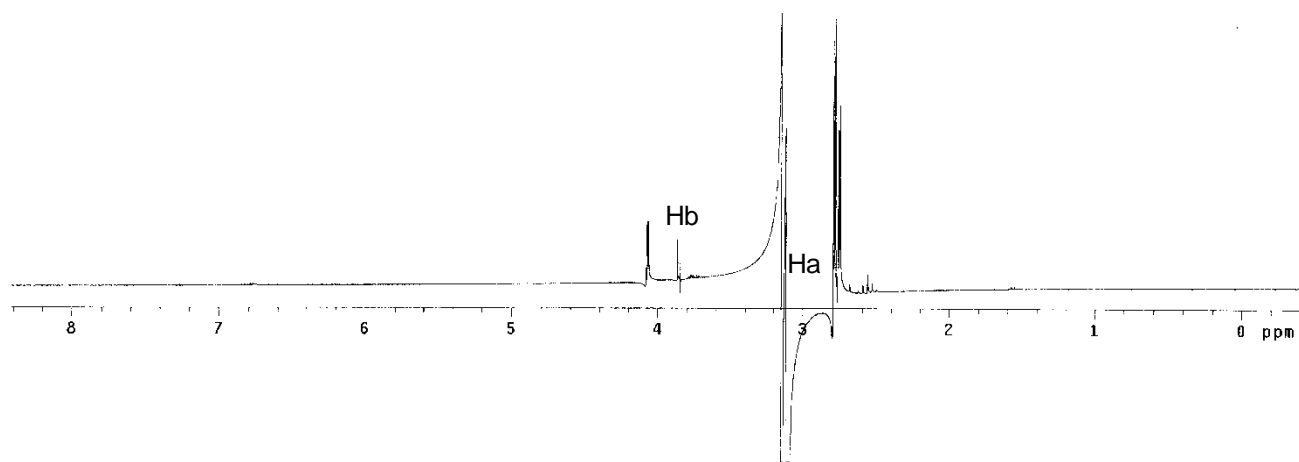



20110711d13methoxy1product2b

Sample Name:  
 Data Collected on:  
 chemmr500.chem.buffalo.edu-inova500  
 Archive directory:  
 Sample directory:  
 FidFile: PROTON  
 Pulse Sequence: PROTON (s2pul)  
 Solvent: cdcl3  
 Data collected on: Jul 11 2011  
 Temp. 25.0 C / 298.1 K  
 Operator: Chemler  
 Relax. delay 1.000 sec  
 Pulse 45.0 degrees  
 Acq. time 2.048 sec  
 Width 8000.0 Hz  
 8 repetitions  
 OBSERVE H1, 499.8984088 MHz  
 DATA PROCESSING  
 FT size 32768  
 Total time 0 min 24 sec

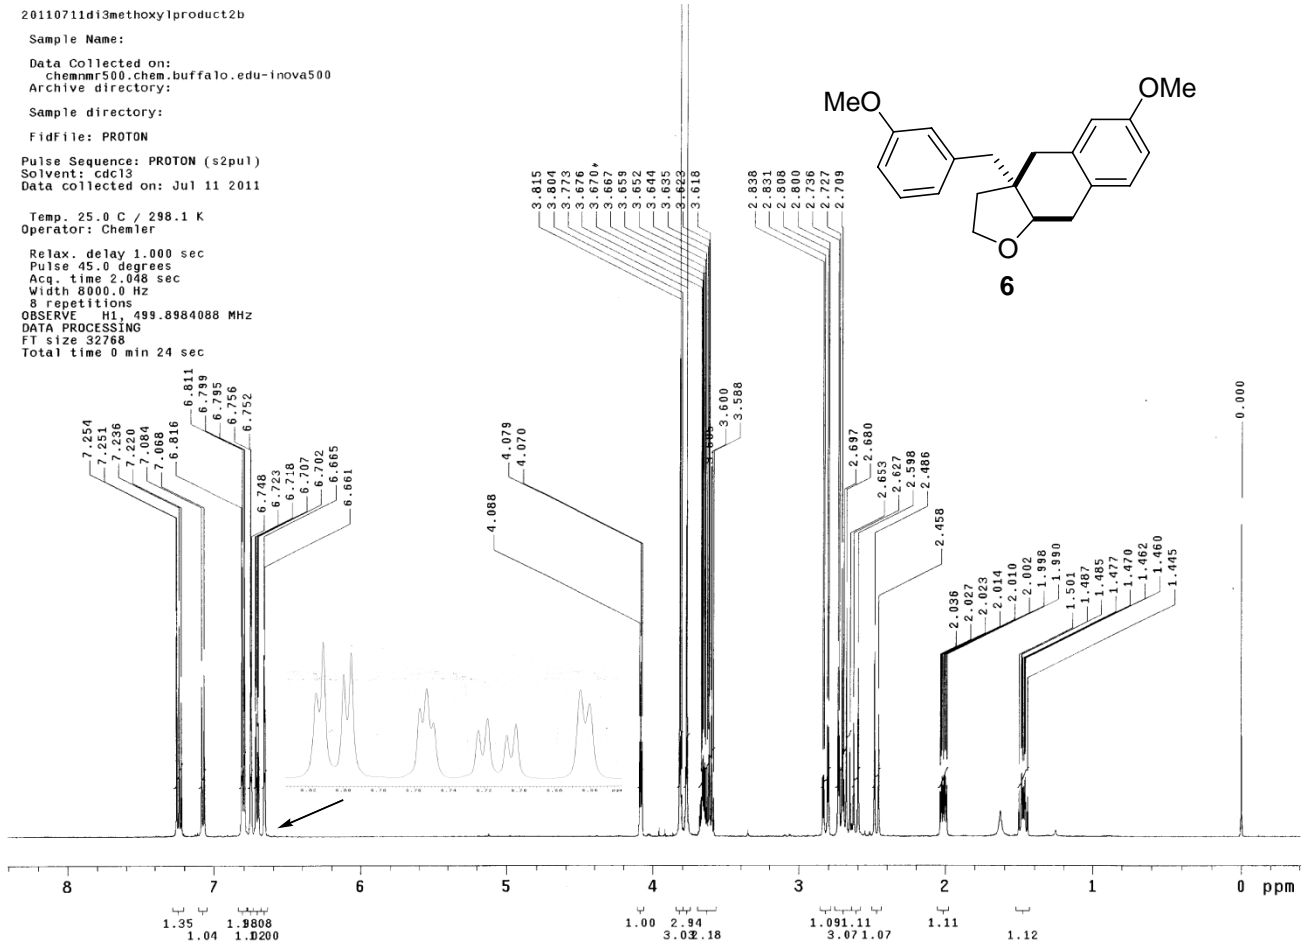

20110711d13methoxy1product2bC13

Sample Name:  
 Data Collected on:  
 roesy.chem.buffalo.edu-mercury300  
 Archive directory:  
 Sample directory:  
 FidFile: CARBON  
 Pulse Sequence: CARBON (s2pul)  
 Solvent: cdcl3  
 Data collected on: Jul 11 2011  
 Operator: Chemler  
 Relax. delay 1.000 sec  
 Pulse 45.0 degrees  
 Acq. time 0.868 sec  
 Width 18867.9 Hz  
 3744 repetitions  
 OBSERVE C13, 75.4536400 MHz  
 DECOUPLE H1, 300.0754430 MHz  
 Power 38 dB  
 continuously on  
 WALTZ-16 modulated  
 DATA PROCESSING  
 Line broadening 0.5 Hz  
 FT size 32768  
 Total time 2 hr, 18 min

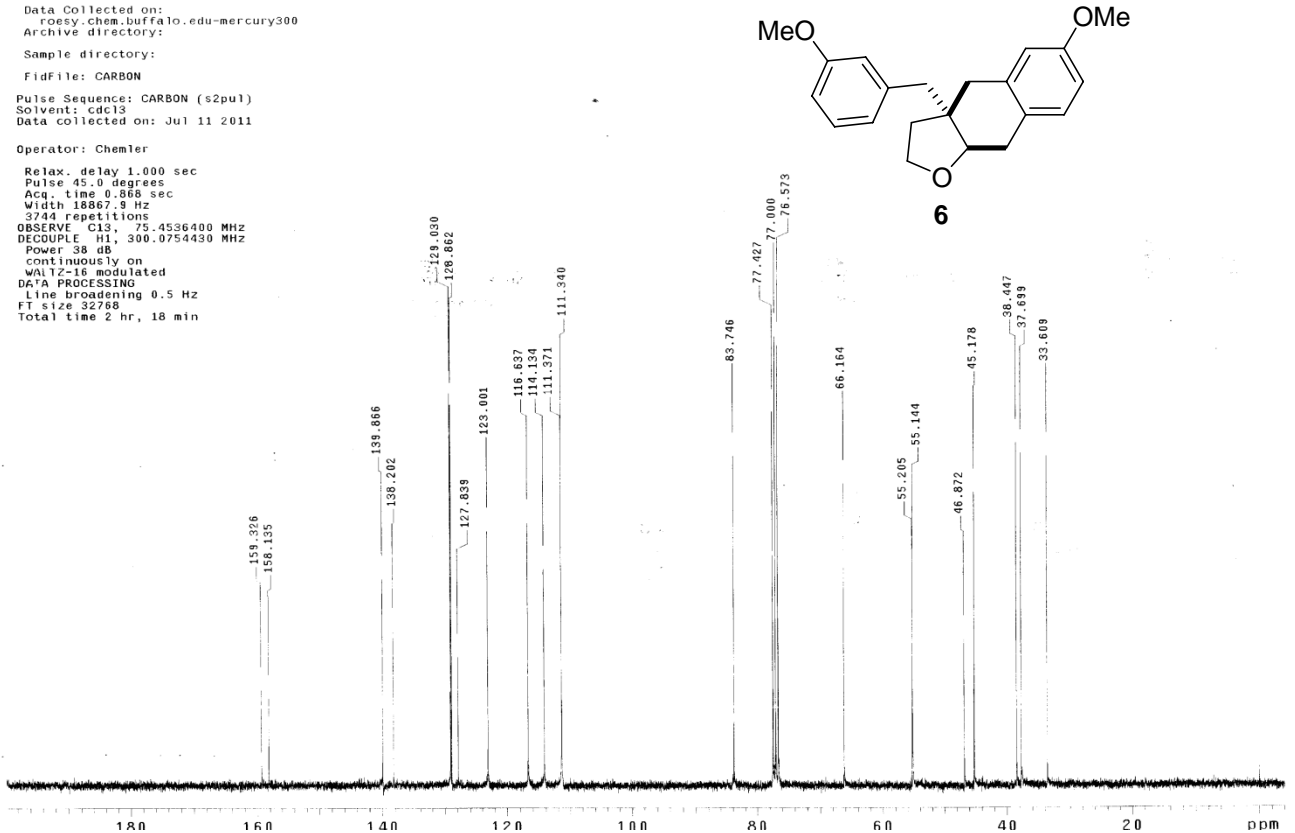

20110713diomethoxy|product1a

Sample Name:

Data Collected on:  
chemnmr500.chem.buffalo.edu-inova500  
Archive directory:

Sample directory:

FidFile: PROTON

Pulse Sequence: PROTON (s2pu1)  
Solvent: cdcl3  
Data collected on: Jul 13 2011

Operator: Chemler

Relax. delay 1.000 sec  
Pulse 45.0 degrees  
Acq. time 2.048 sec  
Width 8000.0 Hz  
8 repetitions  
OBSERVE H1, 499.8984141 MHz  
DATA PROCESSING  
FT size 32768  
Total time 24 min 24 sec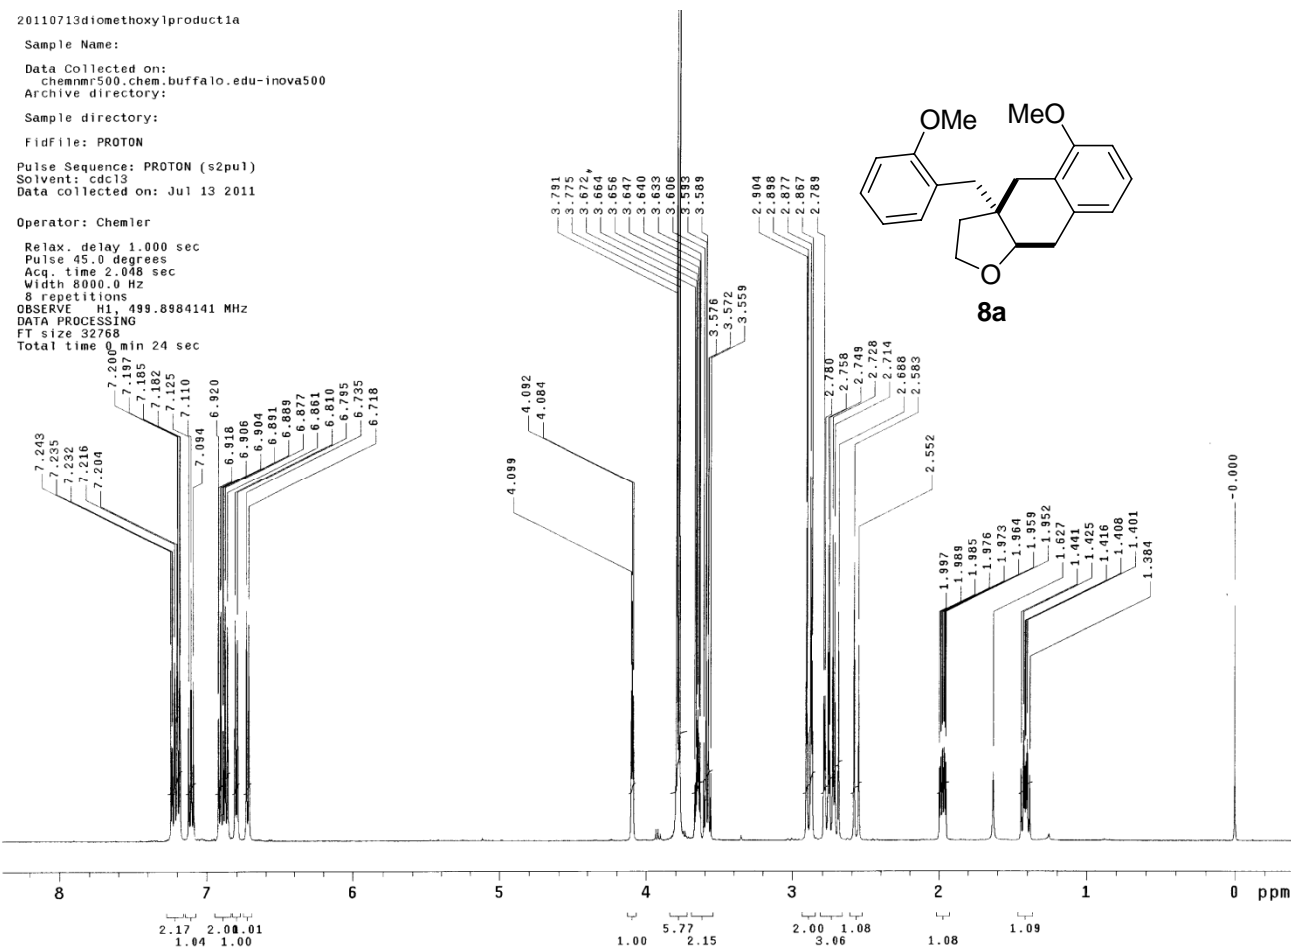

20110713diomethoxy|product1aC13

Sample Name:

Data Collected on:  
roesy.chem.buffalo.edu-mercury300  
Archive directory:

Sample directory:

FidFile: CARBON

Pulse Sequence: CARBON (s2pu1)  
Solvent: cdcl3  
Data collected on: Jul 13 2011

Operator: Chemler

Relax. delay 1.000 sec  
Pulse 45.0 degrees  
Acq. time 0.568 sec  
Width 18867.9 Hz  
4096 repetitions  
OBSERVE C13, 75.4536412 MHz  
DECOUPLE H1, 300.0754430 MHz  
Power 38 dB  
Continuously on  
Waltz-16 modulated  
Line broadening 0.5 Hz  
FT size 32768  
Total time 2 hr, 18 min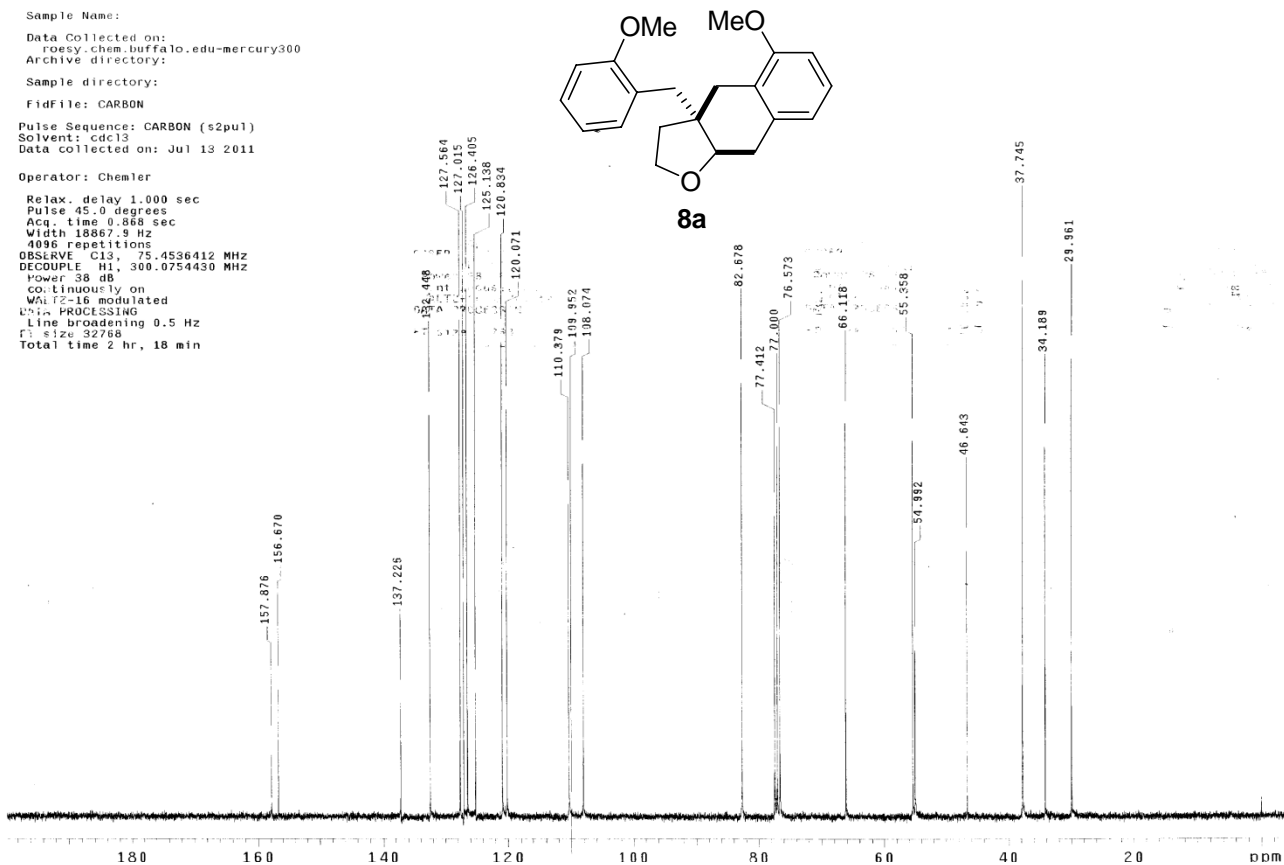

20110714diomethoxylproduct2b

Sample Name:

Data Collected on:  
chemnmr500.chem.buffalo.edu-inova500  
Archive directory:

Sample directory:

FidFile: PROTON

Pulse Sequence: PROTON (s2pul)  
Solvent: cdcl3  
Data collected on: Jul 14 2011

Operator: Chemler

Relax. delay 1.000 sec  
Pulse 45.0 degrees  
Acq. time 2.048 sec  
Width 8000.0 Hz  
# repetitions  
OBSERVE H1: 499.8984097 MHz  
DATA PROCESSING  
FF size 32768  
Total time 24 sec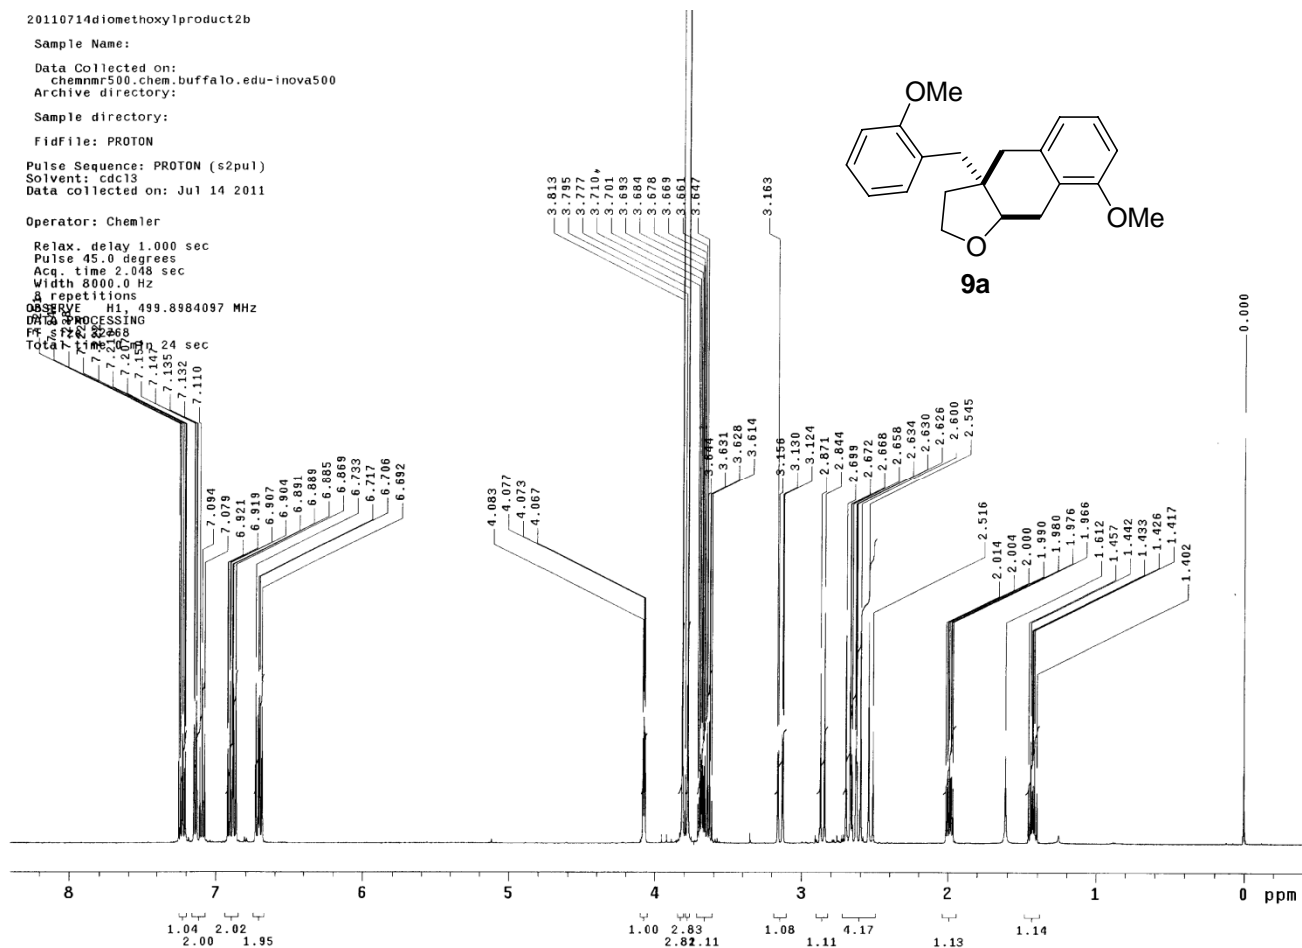

20110714diomethoxylproduct2bC13

Sample Name:

Data Collected on:  
roesy.chem.buffalo.edu-mercury300  
Archive directory:

Sample directory:

FidFile: CARBON

Pulse Sequence: CARBON (s2pul)  
Solvent: cdcl3  
Data collected on: Jul 14 2011

Operator: Chemler

Relax. delay 1.000 sec  
Pulse 45.0 degrees  
Acq. time 0.868 sec  
Width 18867.9 Hz  
# repetitions  
OBSERVE C13: 75.4536400 MHz  
DECOUPLE H1: 300.0754430 MHz  
Power 38 dB  
continuously on  
WALTZ-16 modulated  
DATA PROCESSING  
Line broadening 0.5 Hz  
FT size 32768  
Total time 2 hr, 18 min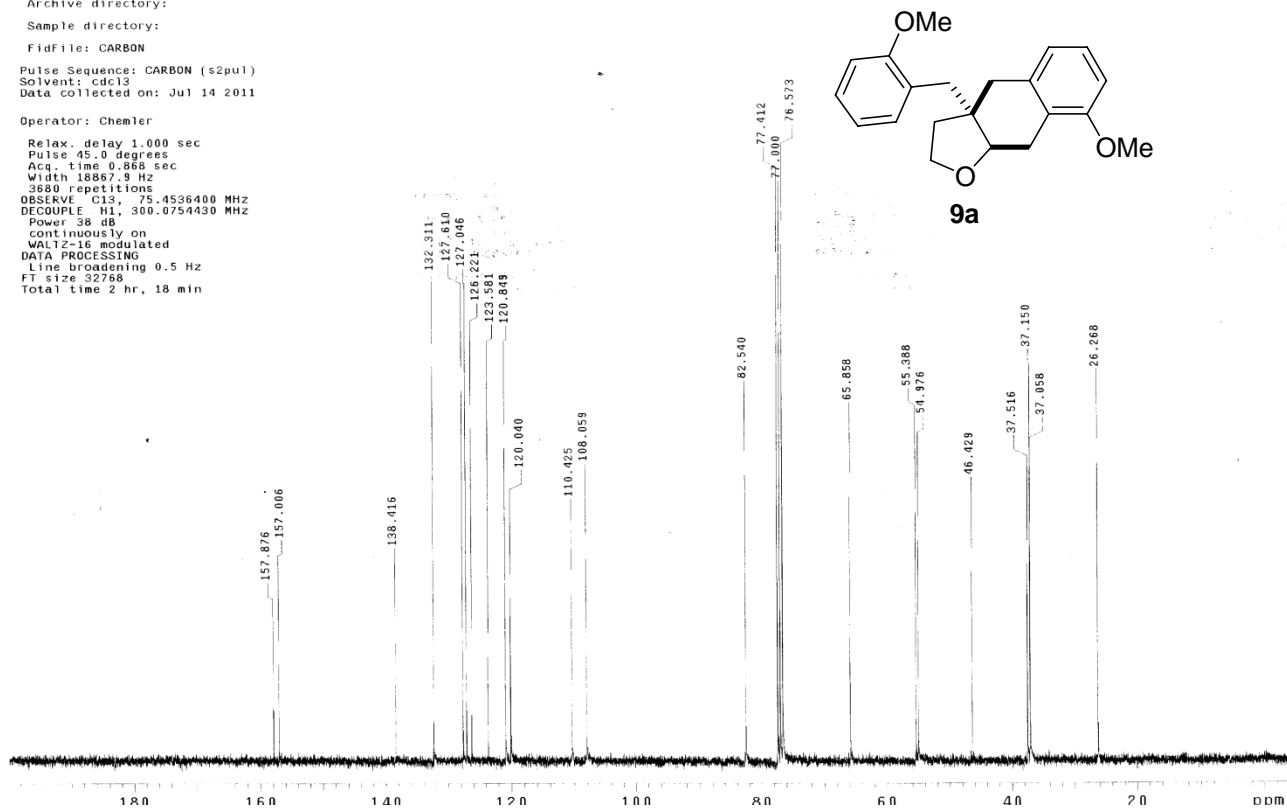

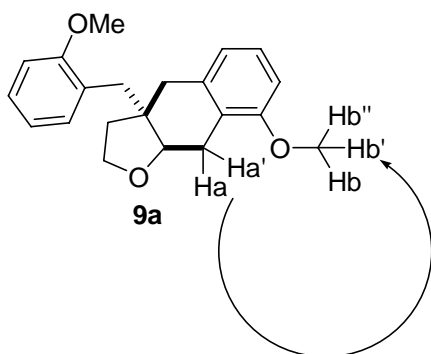

20110714dimethoxyproduct2bNOE  
 Selective band center: 3.18 (ppm); width: 30.8 (Hz)

Sample Name:

Data Collected on:  
 chemmr500.chem.buffalo.edu-inova500  
 Archive directory:

Sample directory:

Fidfile: NDESY1D

Pulse Sequence: NOESY1D  
 Solvent: cdcl3  
 Data collected on: Jul 14 2011

Operator: Chemler

Relax. delay 1.000 sec  
 Pulse 90.0 degrees  
 Acq. time 1.859 sec  
 Width 4406.3 Hz  
 11520 repetitions  
 OBSERVE F1, 499.8983908 MHz  
 DATA PROCESSING  
 FT size 16384  
 Total time 11 hr, 46 min

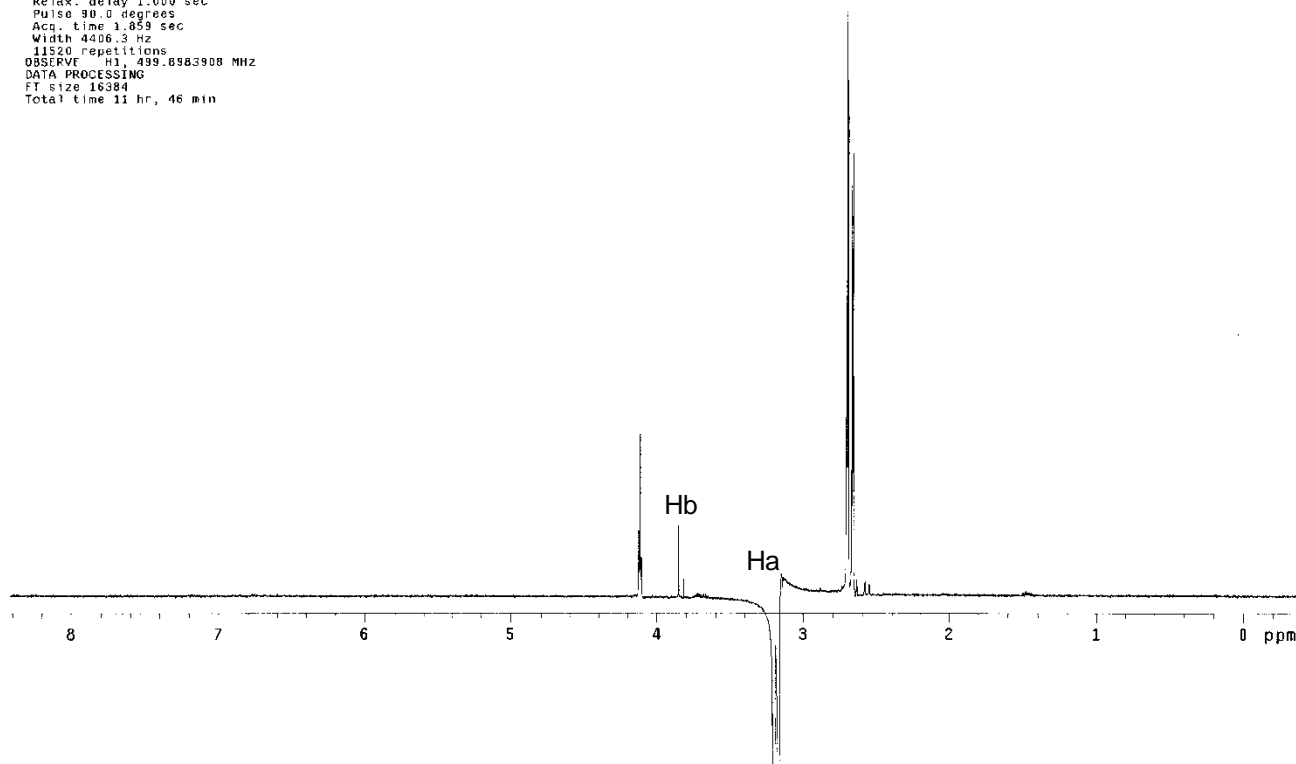

20110718diomethylproduct2b

Sample Name:

Data Collected on:  
chemmr500.chem.buffalo.edu-inova500

Archive directory:

Sample directory:

FidFile: PROTON

Pulse Sequence: PROTON (s2pu1)  
Solvent: cdc13  
Data collected on: Jul 18 2011

Operator: Chemler

Relax. delay 1.000 sec  
Pulse 45.0 degrees  
Acq. time 2.048 sec  
Width 8000.0 Hz  
8 repetitions  
OBSERVE H1, 499.8984166 MHz  
DATA PROCESSING  
FT size 32768  
Total time 0 min 24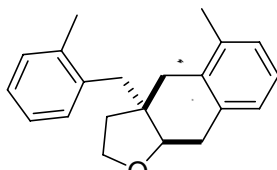

8b

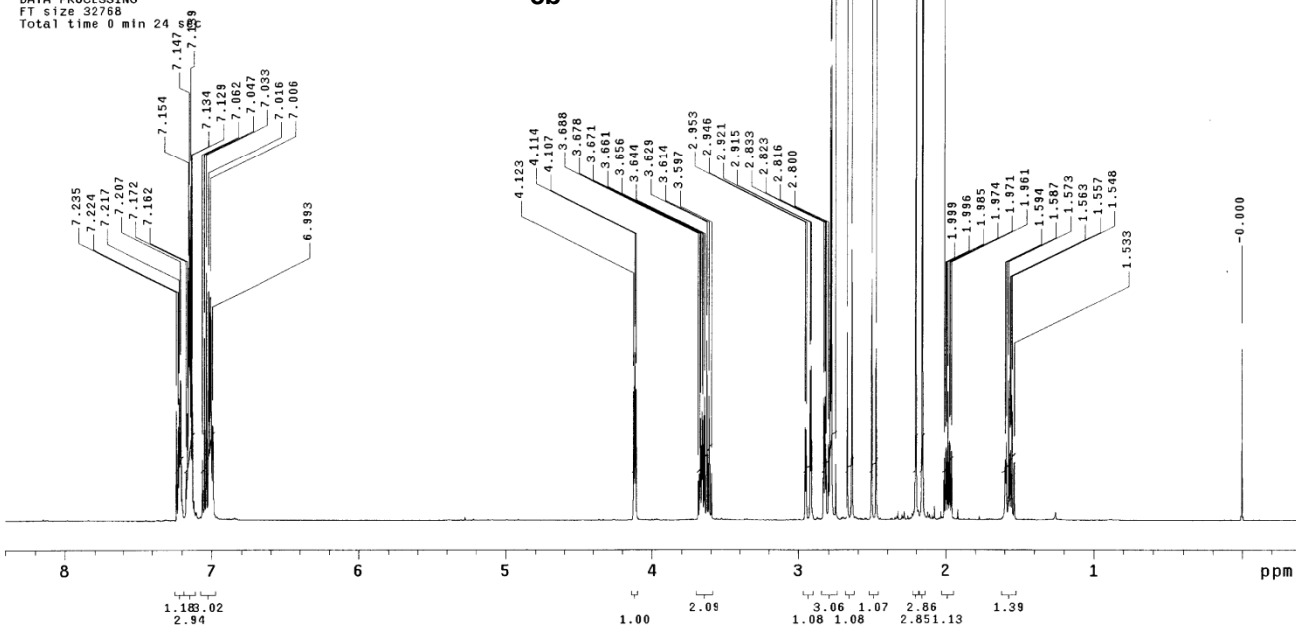

20110718diomethylproduct2bC13

Sample Name:

Data Collected on:  
roesy.chem.buffalo.edu-mercury300

Archive directory:

Sample directory:

FidFile: CARBON

Pulse Sequence: CARBON (s2pu1)  
Solvent: cdc13  
Data collected on: Jul 18 2011

Operator: Chemler

Relax. delay 1.000 sec  
Pulse 45.0 degrees  
Acq. time 0.888 sec  
Width 18867.9 Hz  
4096 repetitions  
OBSERVE C13, 75.4536400 MHz  
DECOUPLE H1, 300.0754430 MHz  
Power 38 dB  
continuously on  
WALTZ-16 modulated  
DATA PROCESSING  
Line broadening 0.5 Hz  
FT size 32768  
Total time 2 hr, 18 min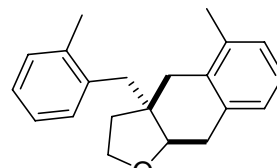

8b

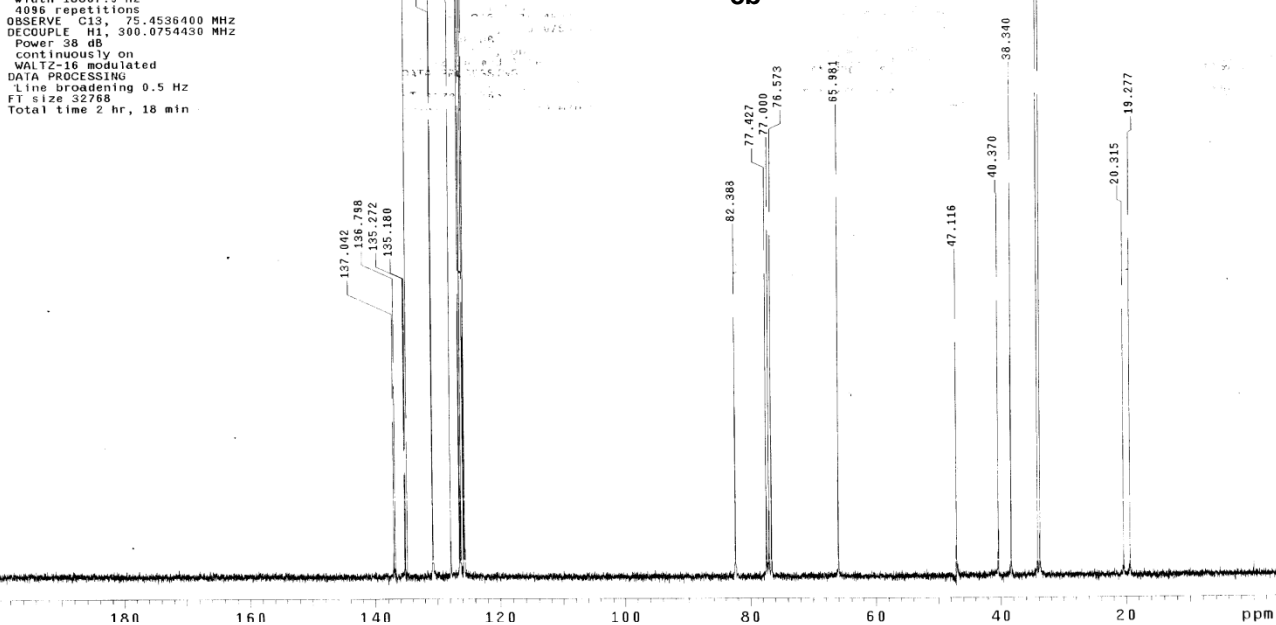

20110725diomethylproduct1a

Sample Name:

Data Collected on:

Chemmr500.chem.buffalo.edu-inova500

Archive directory:

Sample directory:

FidFile: PROTON

Pulse Sequence: PROTON (s2pu1)

Solvent: cdcl3

Data collected on: Jul 25 2011

Operator: Chemler

Relax. delay 1.000 sec

Pulse 45.0 degrees

Acq. time 2.048 sec

Width 8000.0 Hz

8 repetitions

OBSERVE H1, 499.8984078 MHz

DATA PROCESSING

FT size 32768

Total time 0 min 24 sec

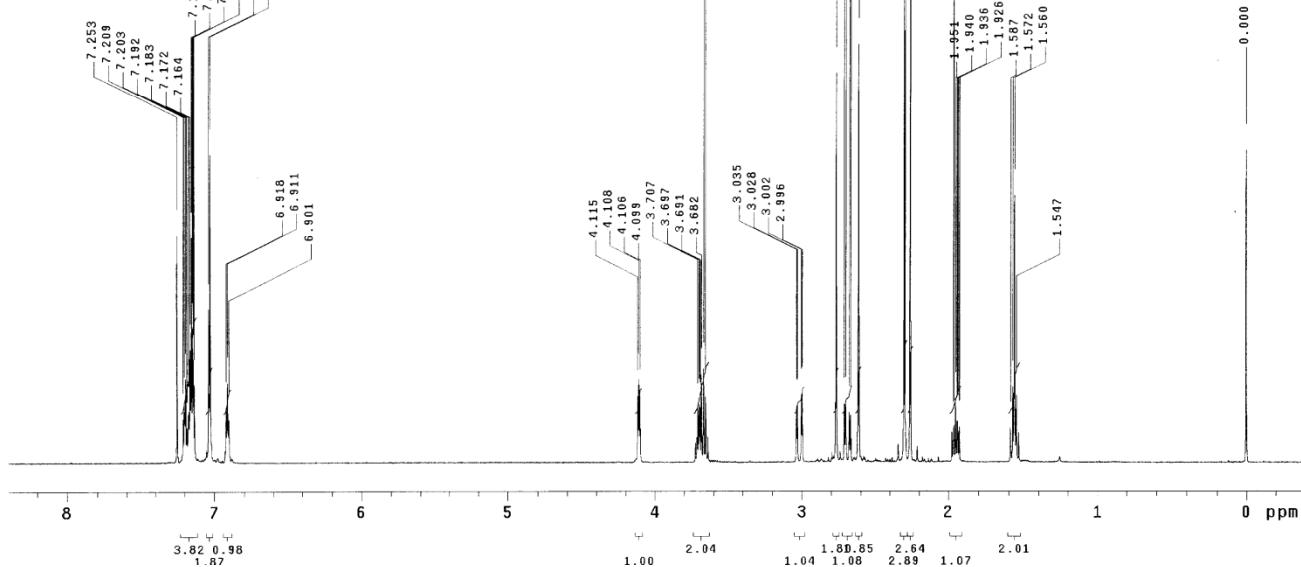

20110725diomethylproduct1aC13

Sample Name:

Data Collected on:

roesy.chem.buffalo.edu-mercury300

Archive directory:

Sample directory:

FidFile: CARBON

Pulse Sequence: CARBON (s2pu1)

Solvent: cdcl3

Data collected on: Jul 26 2011

Temp. 22.0 C / 295.1 K

Operator: Chemler

Relax. delay 1.000 sec

Pulse 45.0 degrees

Acq. time 0.868 sec

Width 18867.3 Hz

7776 repetitions

OBSERVE C13, 75.4536377 MHz

DECOUPLE H1, 300.0754430 MHz

Power 38 dB

continuously on

WALTZ-16 modulated

Line broadening 0.5 Hz

FT size 32768

Total time 5 hr, 47 min

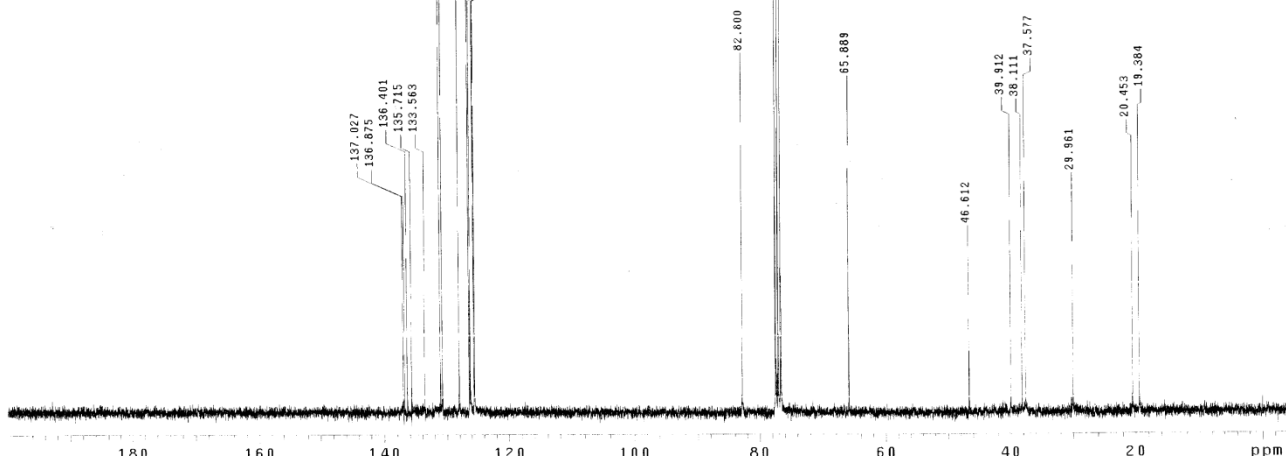

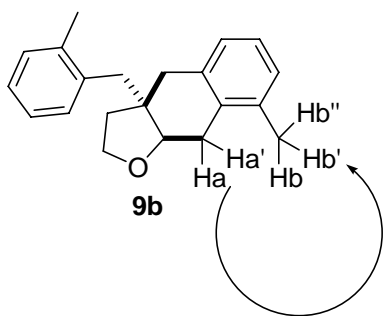

20110725diomethylproductNOF

Sample Name:

Data Collected on:  
chemmr500.chem.buffalo.edu-inova500

Archive directory:

Sample directory:

File: NOESY10

Pulse Sequence: NOESY10  
Solvent: cdcl3  
Data collected on: Jul 25 2011

Operator: Chemier

Relax. delay 1.000 sec  
Pulse 90.0 degrees  
Acq. time 2.462 sec  
Width 3410.1 Hz  
9157 repetitions  
OBSERVE F1, 499.8985908 MHz  
DATA PROCESSING  
F1 size 16384  
Total time 10 hr, 48 min

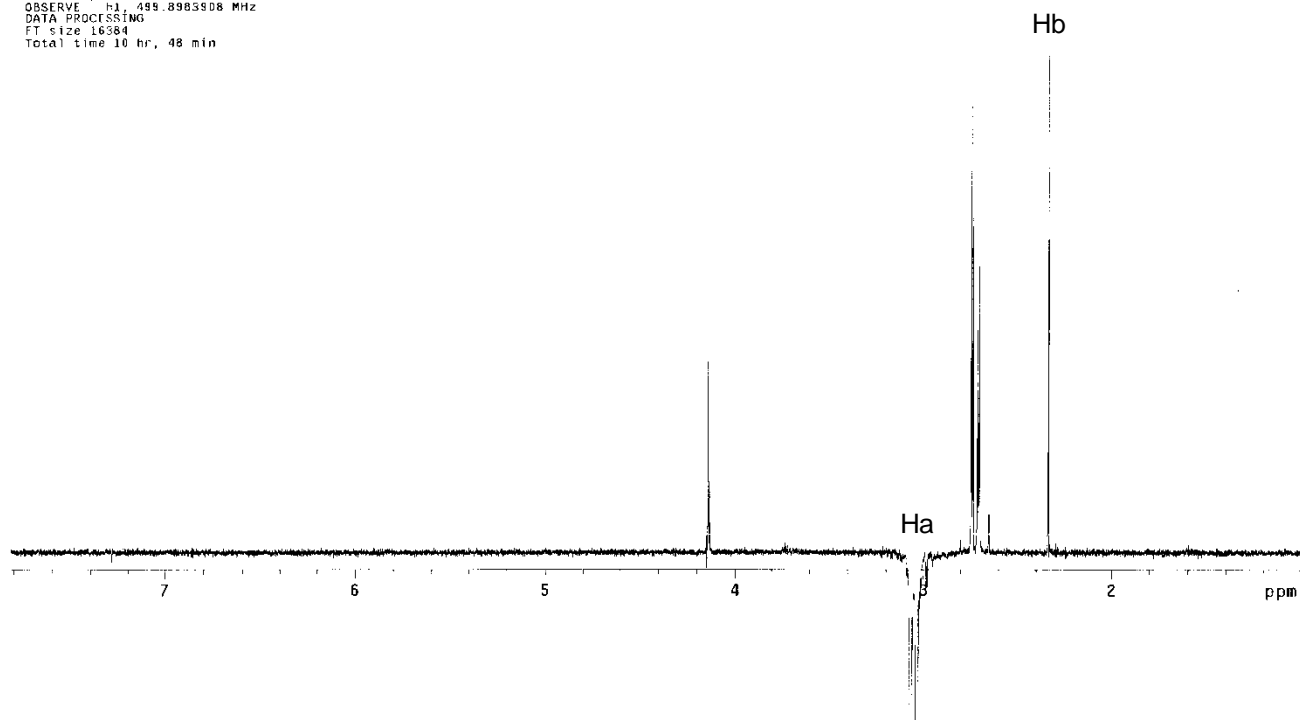

20110720methoxylproduct1a

Sample Name:  
 Data Collected on:  
 chemnmr500.chem.buffalo.edu-inova500  
 Archive directory:  
 Sample directory:  
 FidFile: PROTON

Pulse Sequence: PROTON (s2pul)  
 Solvent: cdcl3  
 Data collected on: Jul 20 2011

Operator: Chemler  
 Relax. delay 1.000 sec  
 Pulse 45.0 degrees  
 Acq. time 2.048 sec  
 Width 8000.0 Hz  
 8 repetitions  
 OBSERVE H1, 499.899 MHz  
 DATA PROCESSING  
 FT size 32768  
 Total time 0 min 24

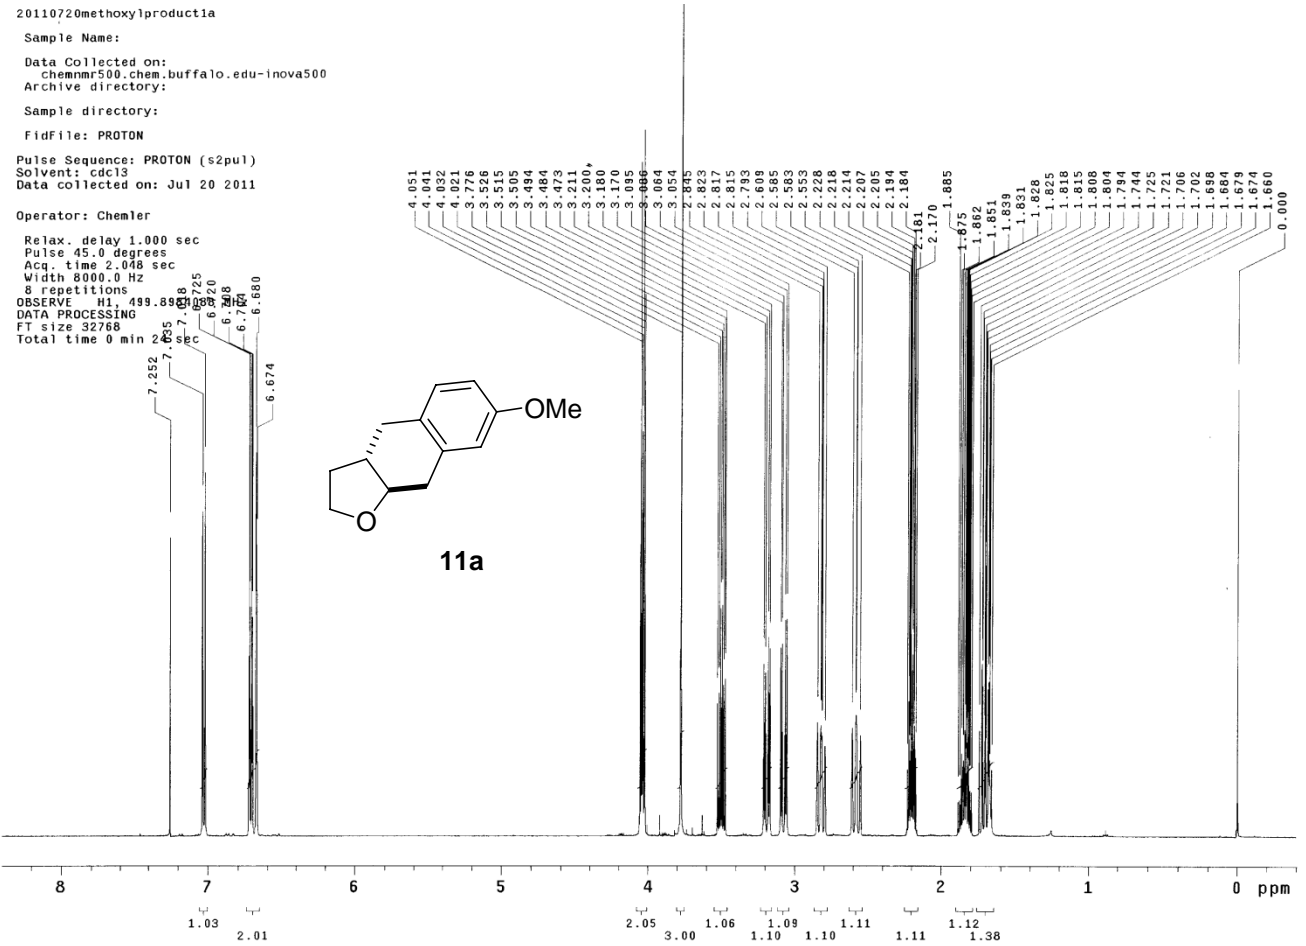

20110720methoxylproduct1aC13

Sample Name:  
 Data Collected on:  
 roesy.chem.buffalo.edu-mercury300  
 Archive directory:  
 Sample directory:  
 FidFile: 20110720methoxylproduct1aC13

Pulse Sequence: CARBON (s2pul)  
 Solvent: cdcl3  
 Data collected on: Jul 20 2011

Operator: Chemler  
 Relax. delay 1.000 sec  
 Pulse 45.0 degrees  
 Acq. time 0.868 sec  
 Width 18867.9 Hz  
 3776 repetitions  
 OBSERVE C13, 75.4536375 MHz  
 DECOUPLE H1, 300.0754430 MHz  
 Power 38 dB  
 continuously on  
 WALTZ-16 modulated  
 DATA PROCESSING  
 Line broadening 0.5 Hz  
 FT size 32768  
 Total time 2 hr, 18 min

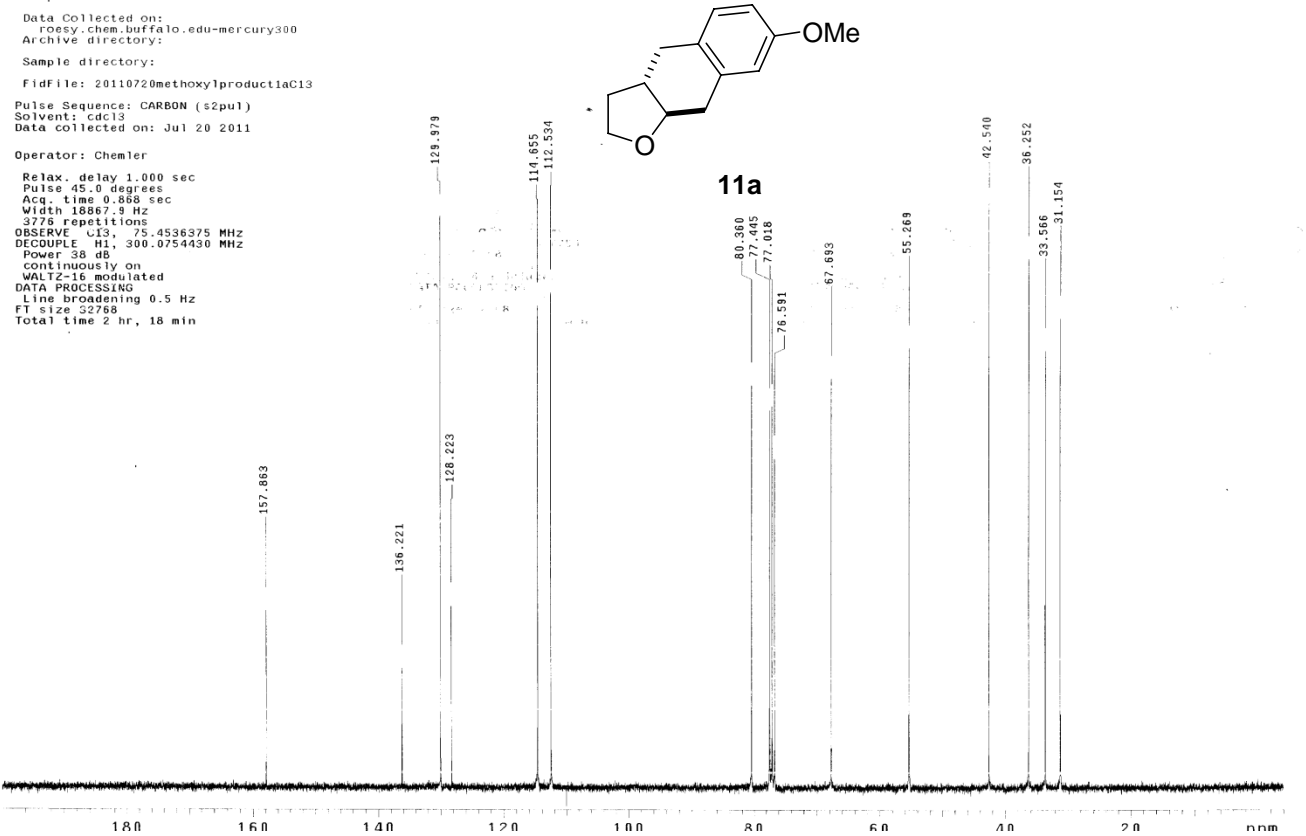



20110727methoxyproduct2a

Sample Name:  
 Data Collected on:  
 chemmr500.chem.buffalo.edu-inova500  
 Archive directory:  
 Sample directory:  
 FidFile: PROTON  
 Pulse Sequence: PROTON (s2pu1)  
 Solvent: cdcl3  
 Data collected on: Jul 27 2011

Operator: Chemier  
 Relax. delay 1.000 sec  
 Pulse 45.0 degrees  
 Acq. time 2.048 sec  
 Width 8000.0 Hz  
 8 repetitions  
 OBSERVE H1, 499.8984063 MHz  
 DATA PROCESSING  
 FT size 32768  
 Total time 0 min 24 sec

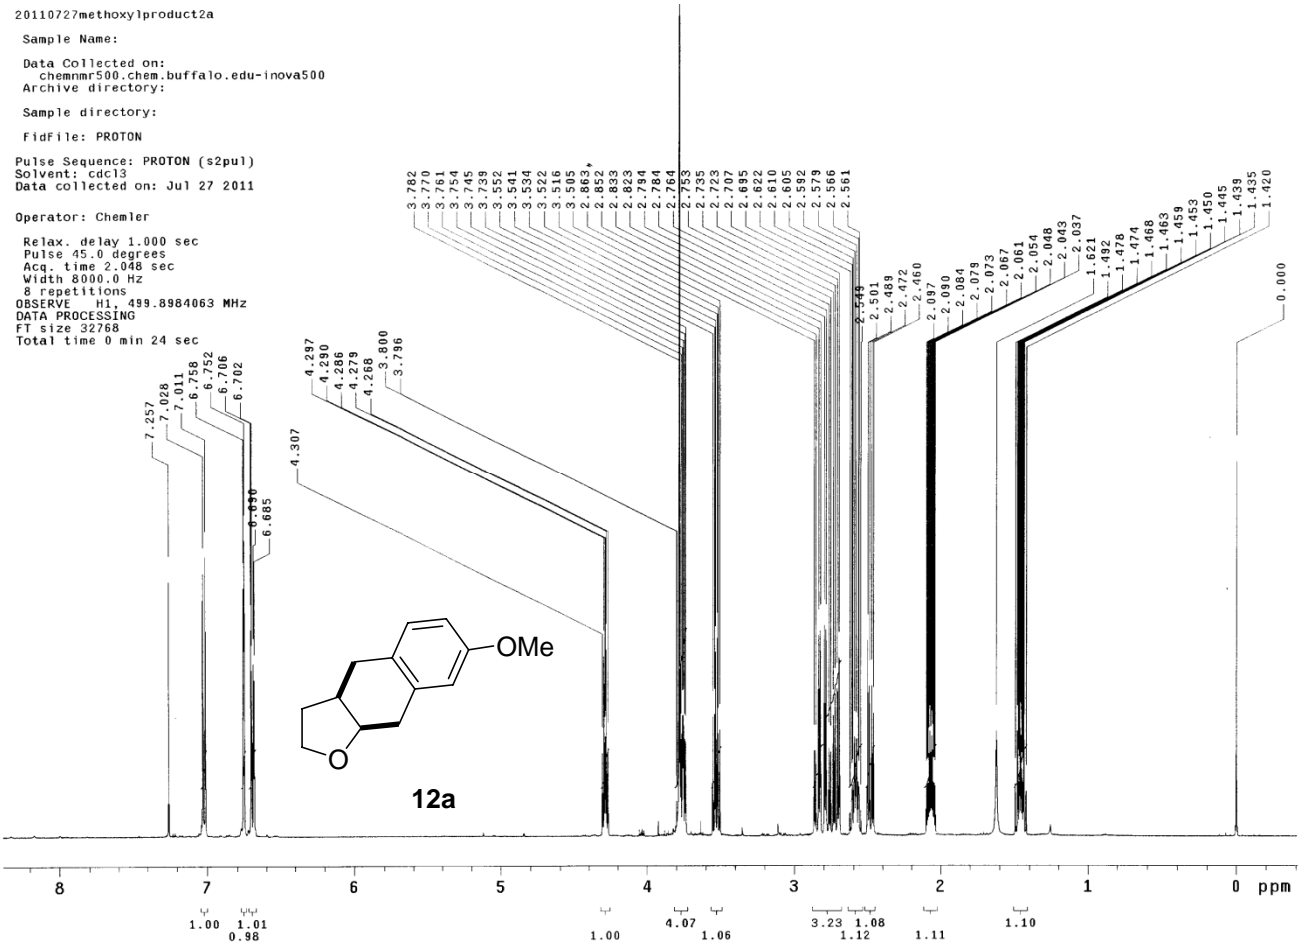

20110727methoxyproduct2aC13

Sample Name:  
 Data Collected on:  
 roesy.chem.buffalo.edu-mercury300  
 Archive directory:  
 Sample directory:  
 FidFile: CARBON  
 Pulse Sequence: CARBON (s2pu1)  
 Solvent: cdcl3  
 Data collected on: Jul 27 2011

Temp. 22.0 C / 295.1 K  
 Operator: Chemier  
 Relax. delay 1.000 sec  
 Pulse 45.0 degrees  
 Acq. time 0.868 sec  
 Width 18867.9 Hz  
 3360 repetitions  
 OBSERVE C13, 75.4536377 MHz  
 DECOUPLE H1, 300.0754430 MHz  
 Power 38 dB  
 continuously on  
 WALTZ-16 modulated  
 DATA PROCESSING  
 Line broadening 0.5 Hz  
 FT size 32768  
 Total time 2 hr, 18 min

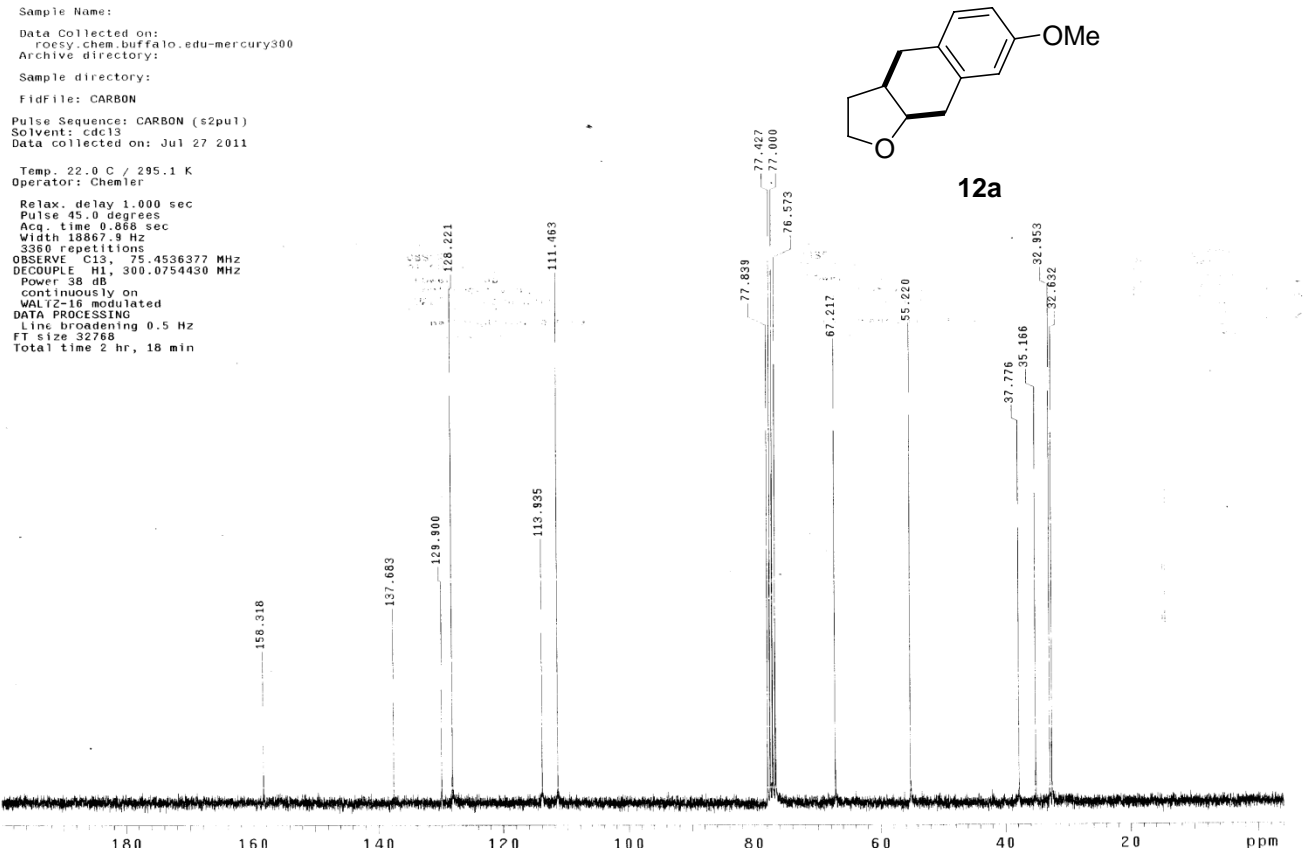

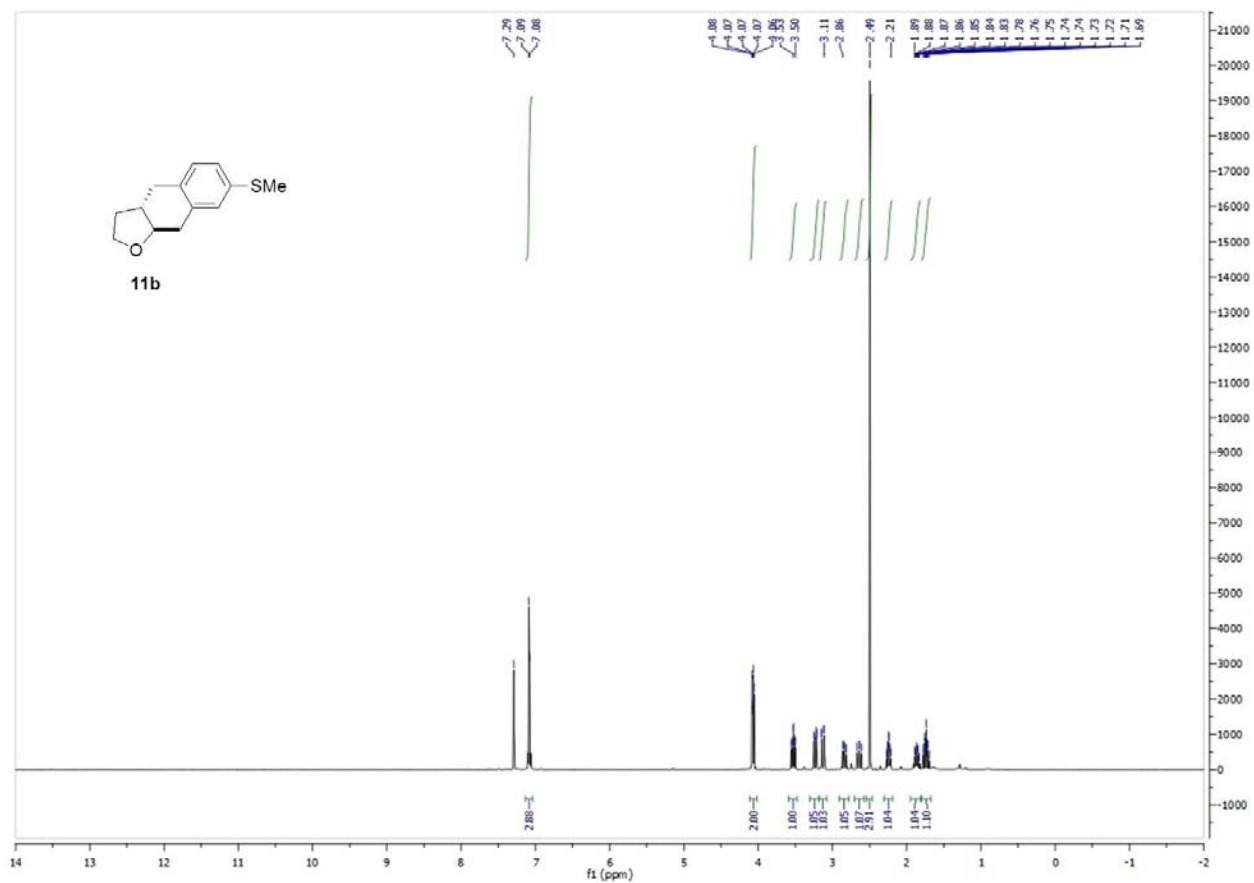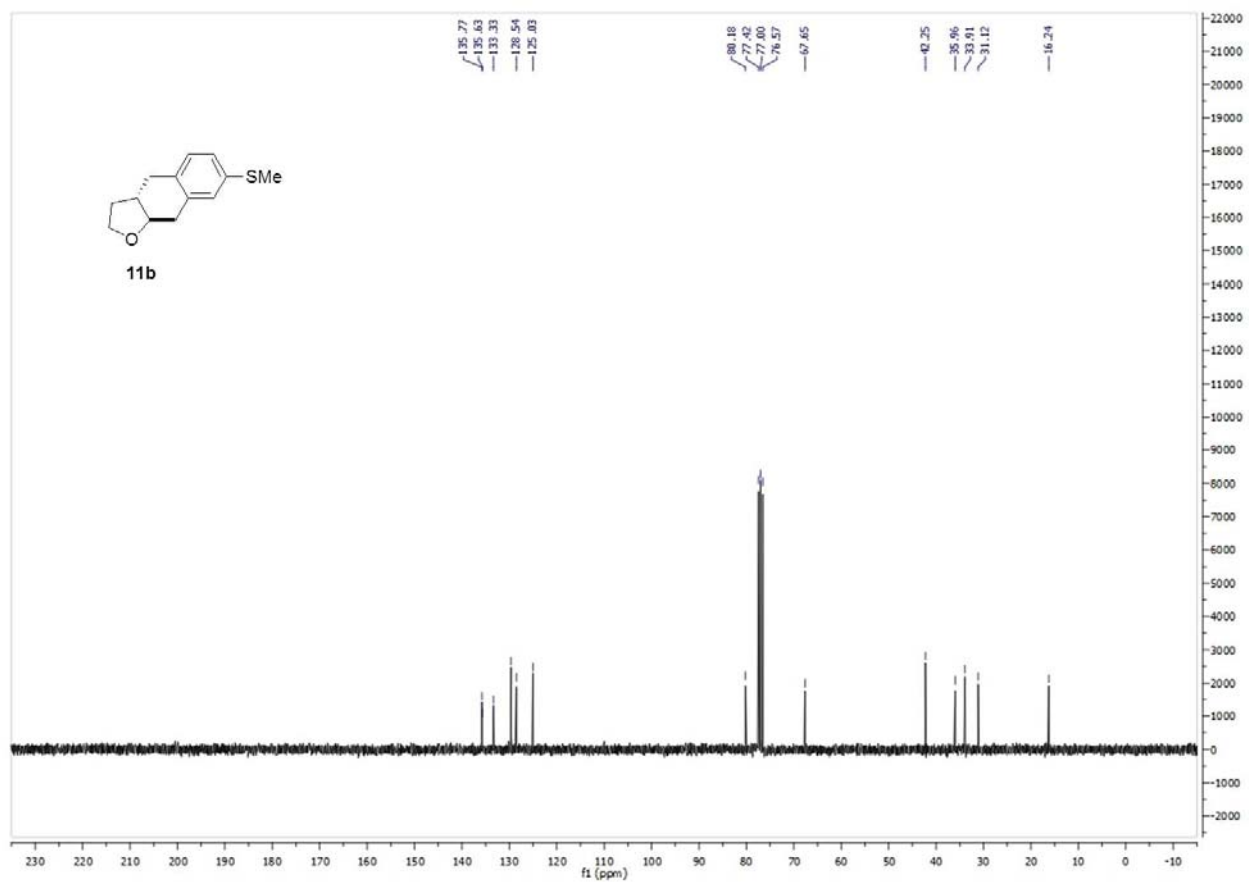

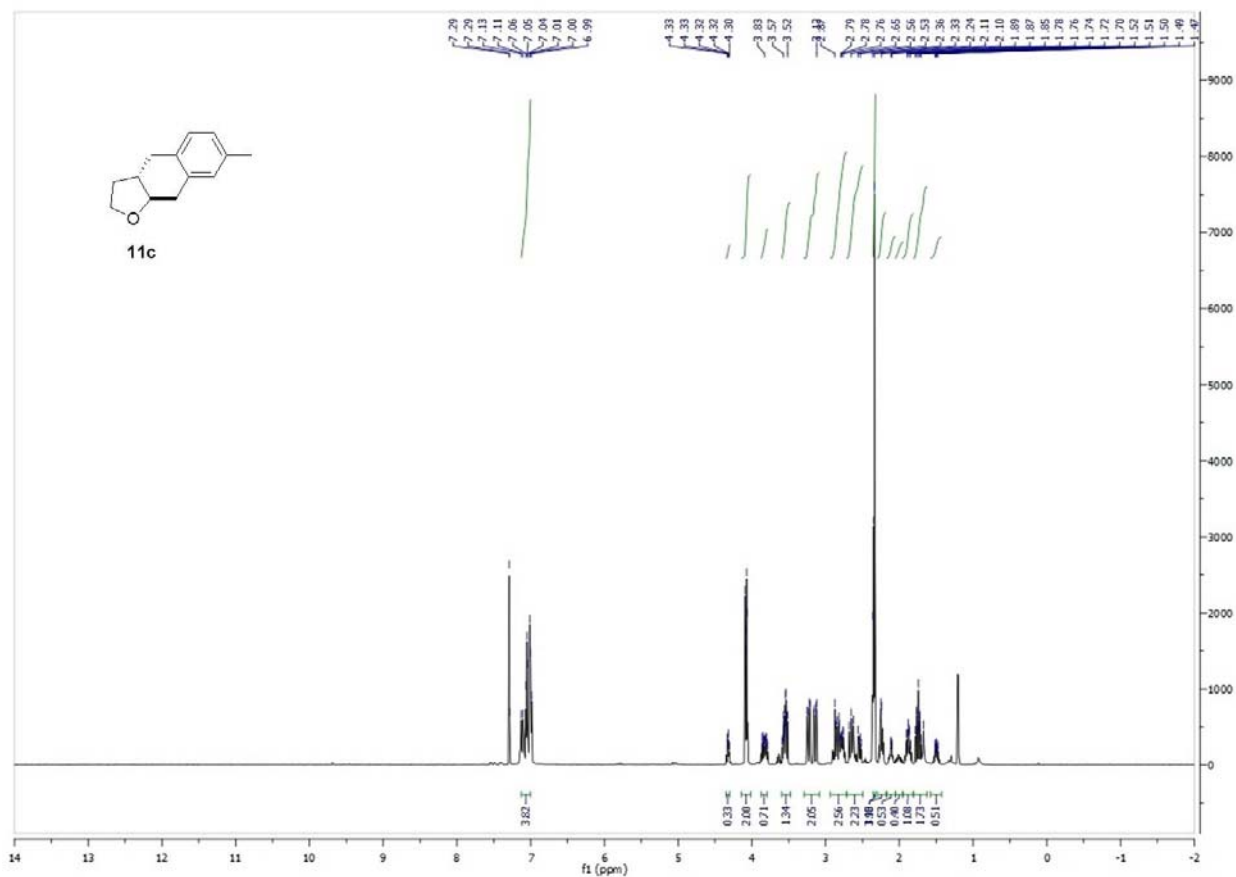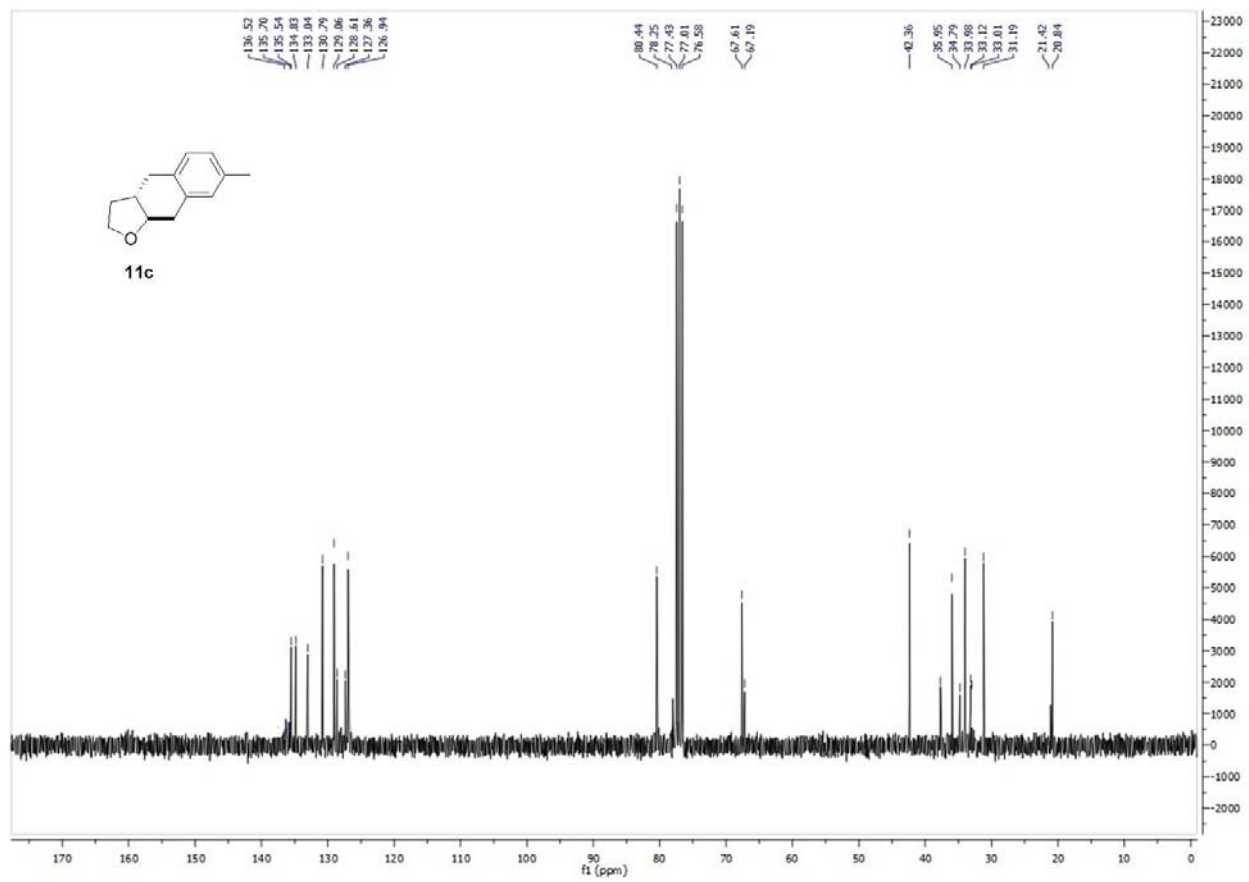

20110709diphenylproduct23

Sample Name:  
Data Collected on:  
chemmr500.chem.buffalo.edu-inova500  
Archive directory:  
Sample directory:  
FidFile: PROTON

Pulse Sequence: PROTON (s2pul)  
Solvent: cdcl3  
Data collected on: Jul 9 2011

Temp. 0.0 C / 273.1 K  
Operator: Chemler

Relax. delay 1.000 sec  
Pulse 45.0 degrees  
Acq. time 2.048 sec  
Width 8000.0 Hz  
8 repetitions  
OBSERVE H1, 499.8184068 MHz  
DATA PROCESSING  
FT size 32668  
Total time 9 min 24 sec

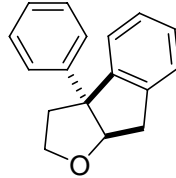

14

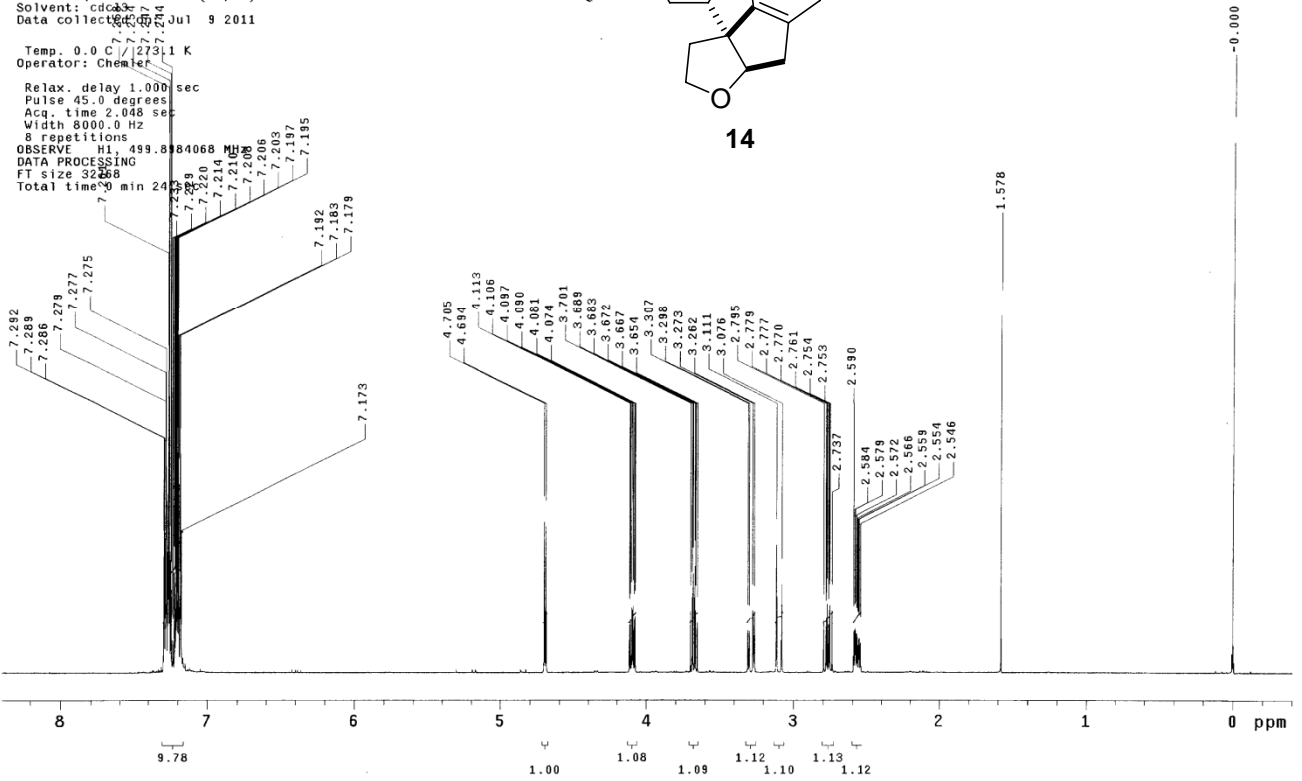

20110709diphenylproductC13

Sample Name:  
Data Collected on:  
foesy.chem.buffalo.edu-mercury300  
Archive directory:  
Sample directory:  
FidFile: CARBON

Pulse Sequence: CARBON (s2pul)  
Solvent: cdcl3  
Data collected on: Jul 9 2011

Operator: Chemler  
Relax. delay 1.000 sec  
Pulse 45.0 degrees  
Acq. time 0.868 sec  
Width 18867.9 Hz  
4096 repetitions  
OBSERVE C13, 75.4536389 MHz  
DECOUPLE H1, 300.0754430 MHz  
Power 38 dB  
continuously on  
WALTZ-16 modulated  
DATA PROCESSING  
Line broadening 0.5 Hz  
FT size 32768  
Total time 2 hr, 18 min

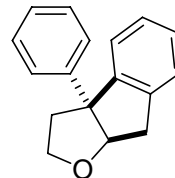

14

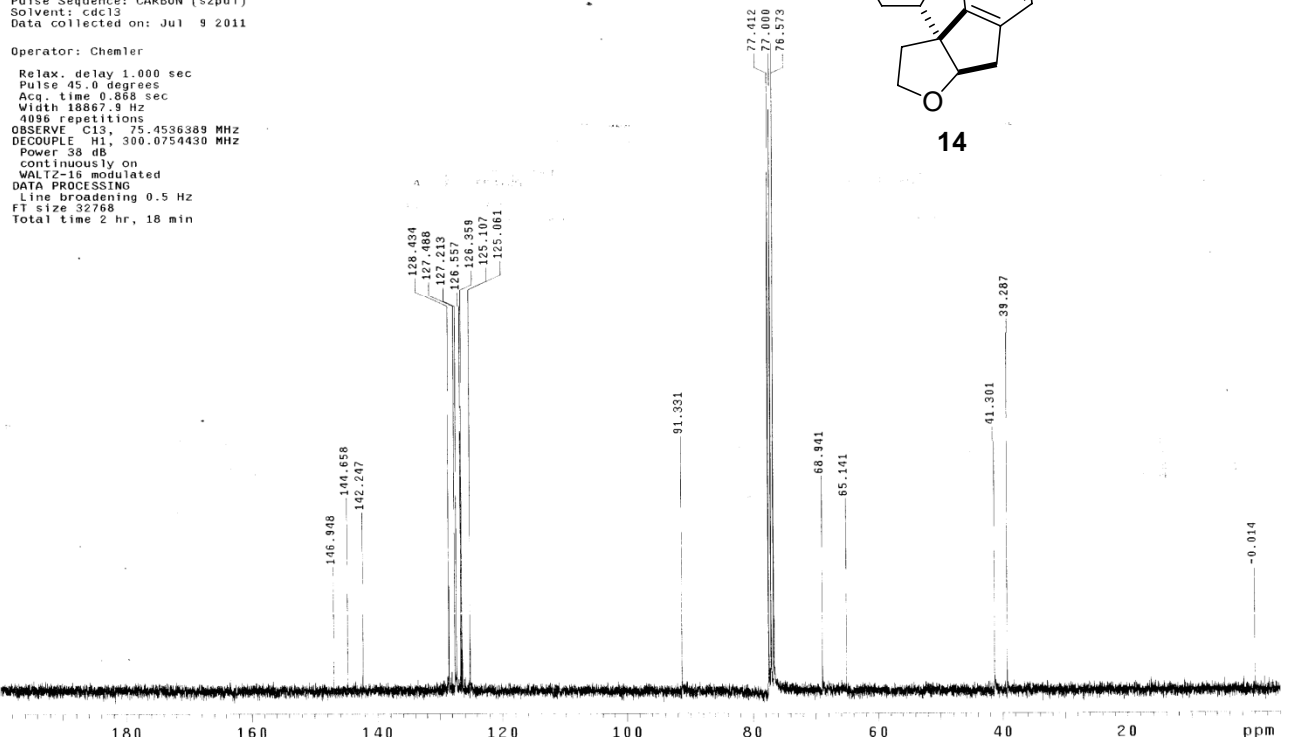

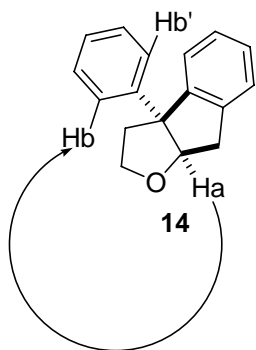

20110721diphenylproductNOE

Sample Name:

Data Collected on:  
chemmr500.chem.buffalo.edu-inova500

Archive directory:

Sample directory:

Fidfile: NOESY10

Pulse Sequence: NOESY10  
Solvent: cdcl3  
Data collected on: Jul 21 2011

Operator: Chemler

Relax. delay 1.000 sec  
Pulse 90.0 degrees  
Acq. time 2.730 sec  
Width 3001.2 Hz  
5216 repetitions  
OBSERVE H1, 499.8383908 MHz  
DATA PROCESSING  
FT size 16384  
Total time 11 hr, 36 min

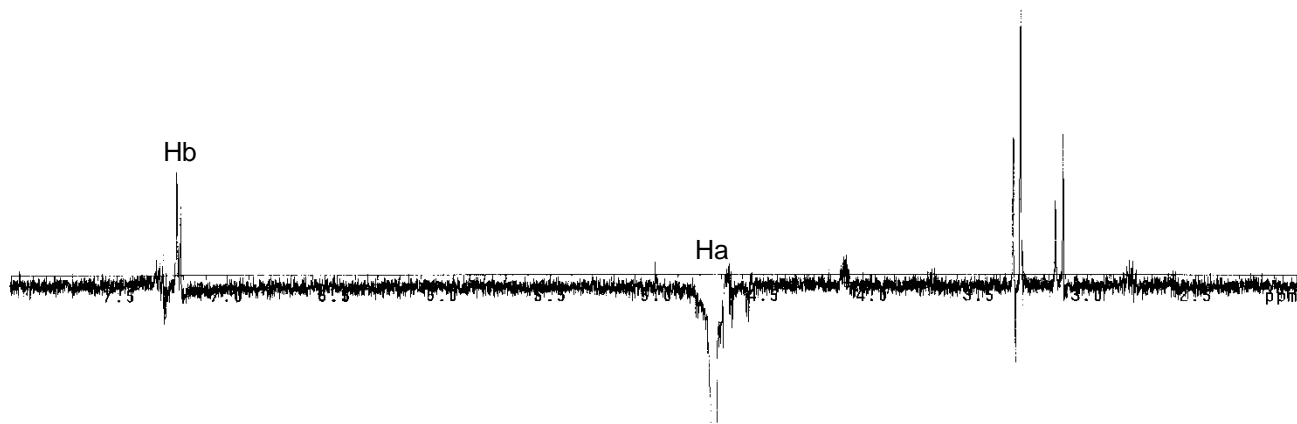

20110801dibenzylphenylproduct1b

Sample Name:  
 Data Collected on:  
 chemmr500.chem.buffalo.edu-inova500  
 Archive directory:  
 Sample directory:  
 FidFile: PROTON

Pulse Sequence: PROTON (s2pu1)  
 Solvent: cdc13  
 Data collected on:  
 Operator: Chemler  
 Relax. delay 1.000 sec  
 Pulse 45.0 degrees  
 Acq. time 2.048 sec  
 Width 8000.0 Hz  
 8 repetitions  
 OBSERVE C13, 49.8594092 MHz  
 DATA PROCESSING  
 FT size 32768  
 Total time 0 min, 24 sec

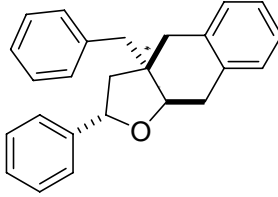

16a

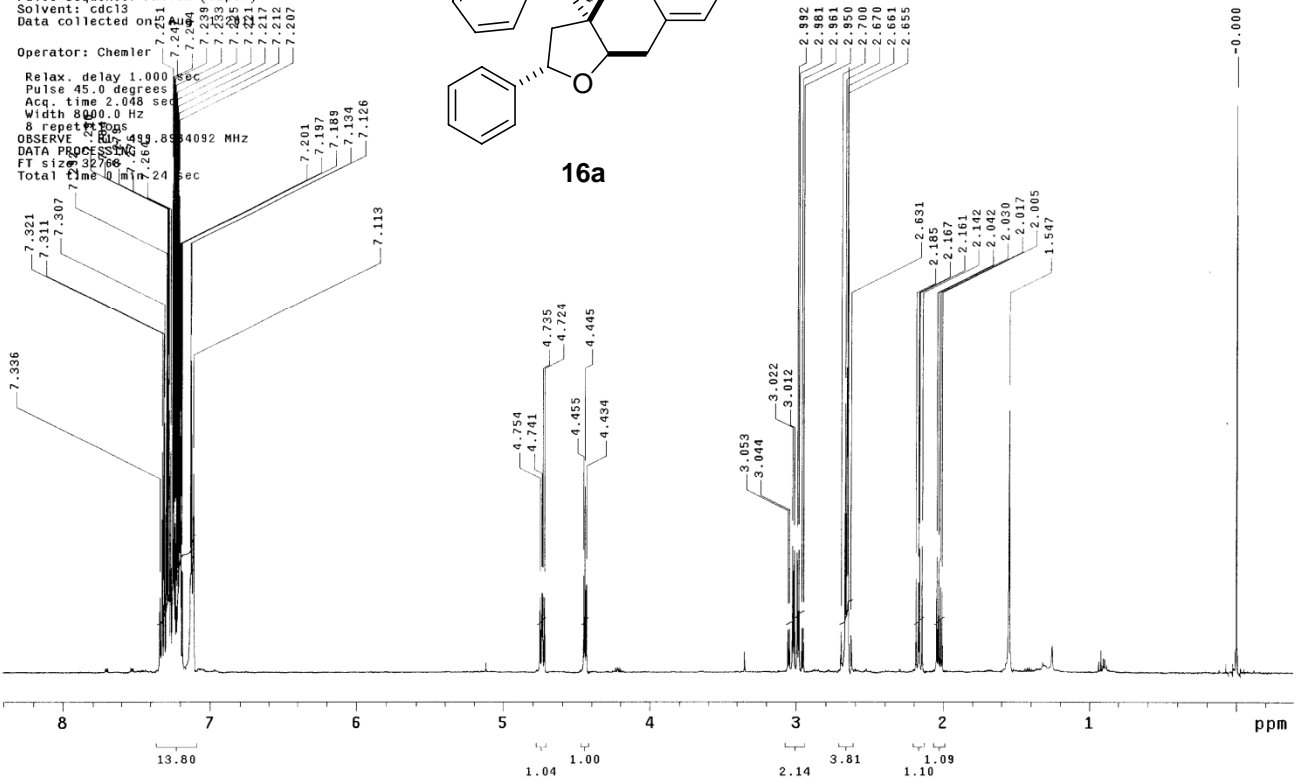

20110801dibenzylphenylproduct1bC13

Sample Name:  
 Data Collected on:  
 roesy.chem.buffalo.edu-mercury300  
 Archive directory:  
 Sample directory:  
 FidFile: CARBON

Pulse Sequence: CARBON (s2pu1)  
 Solvent: cdc13  
 Data collected on: Aug 1 2011  
 Temp. 22.0 C / 295.1 K  
 Operator: Chemler  
 Relax. delay 1.000 sec  
 Pulse 45.0 degrees  
 Acq. time 0.868 sec  
 Width 18867.9 Hz  
 752 repetitions  
 OBSERVE C13, 75.4536377 MHz  
 DECOUPLE H1, 300.0754430 MHz  
 Power 38 db  
 CONTINUOUSLY on  
 WALTZ-16 modulated  
 DATA PROCESSING  
 Line broadening 0.5 Hz  
 FT size 32768  
 Total time 5 hr, 47 min

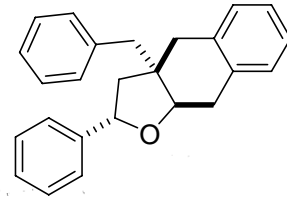

16a

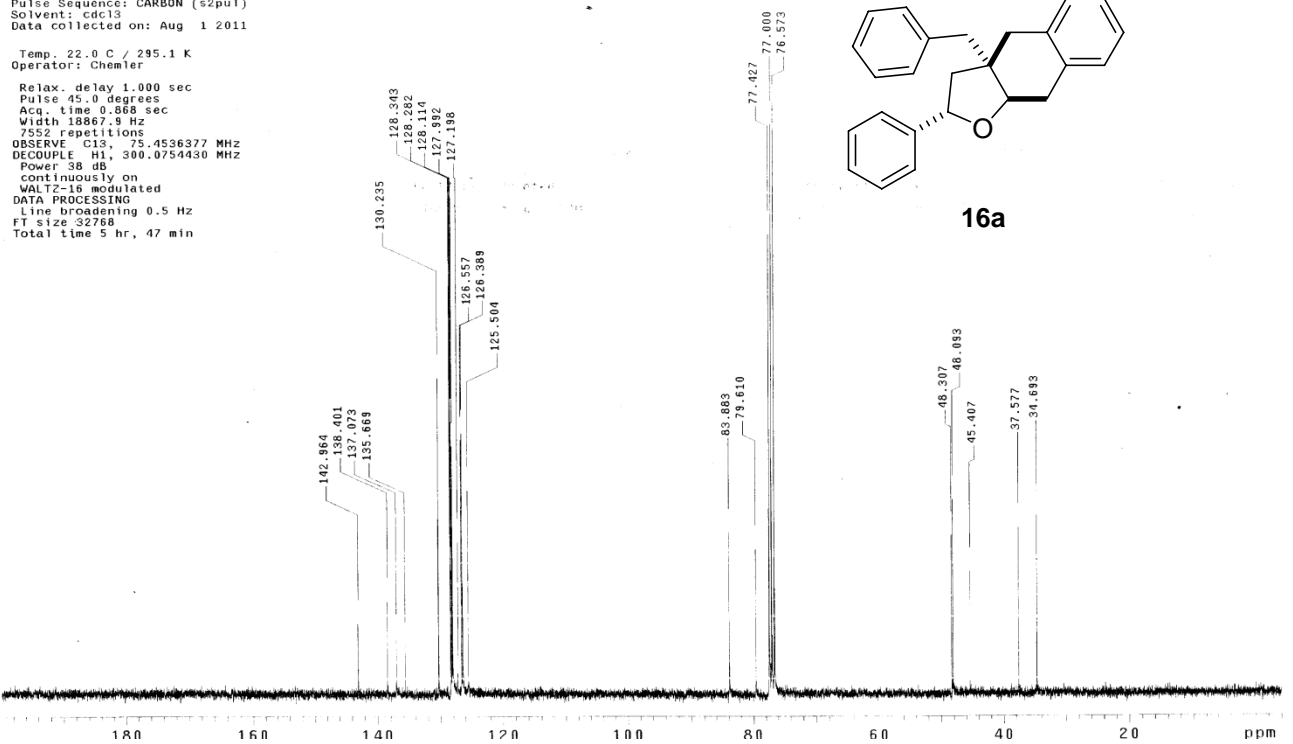

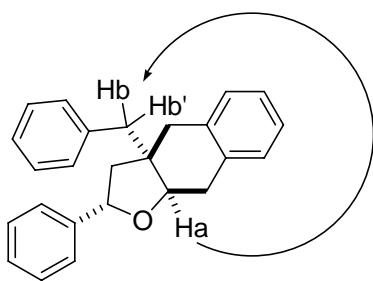**16a**

20110801dibenzylphenylproduct1bN01  
Sample Name:  
Data Collected on:  
chemmr500.chem.buffalo.edu-inova500  
Archive directory:  
Sample directory:  
FidFile: N0FSY1D  
Pulse Sequence: N0FSY1D  
Solvent: cdcl3  
Data collected on: Aug 1 2011  
Operator: Chemlar  
Relax. delay 1.000 sec  
Pulse 90.0 degrees  
Acq. time 2.479 sec  
Width 3304.7 Hz  
9858 repetitions  
OBSERVE H1, 499.8983908 MHz  
DATA PROCESSING  
F1 size 16384  
Total time 12 hr, 7 min

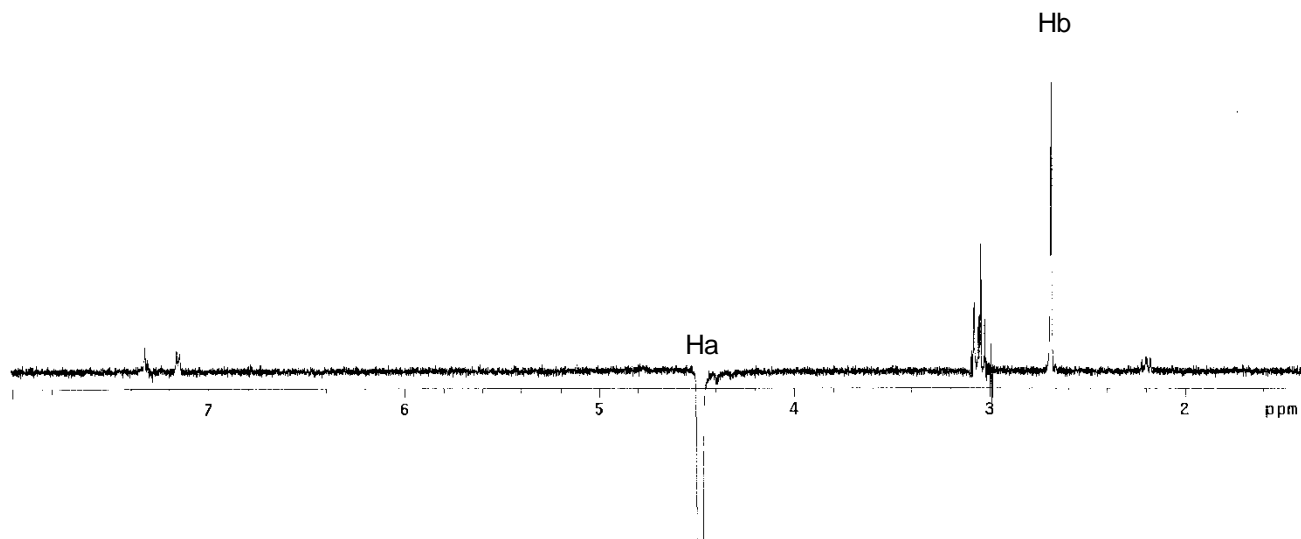

20110805dibenzylphenylproduct2b  
 Sample Name:  
 Data Collected on:  
 Chemnmr500.chem.buffalo.edu-inova500  
 Archive directory:  
 Sample directory:  
 Fidfile: PROTON

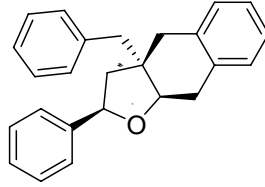

17a

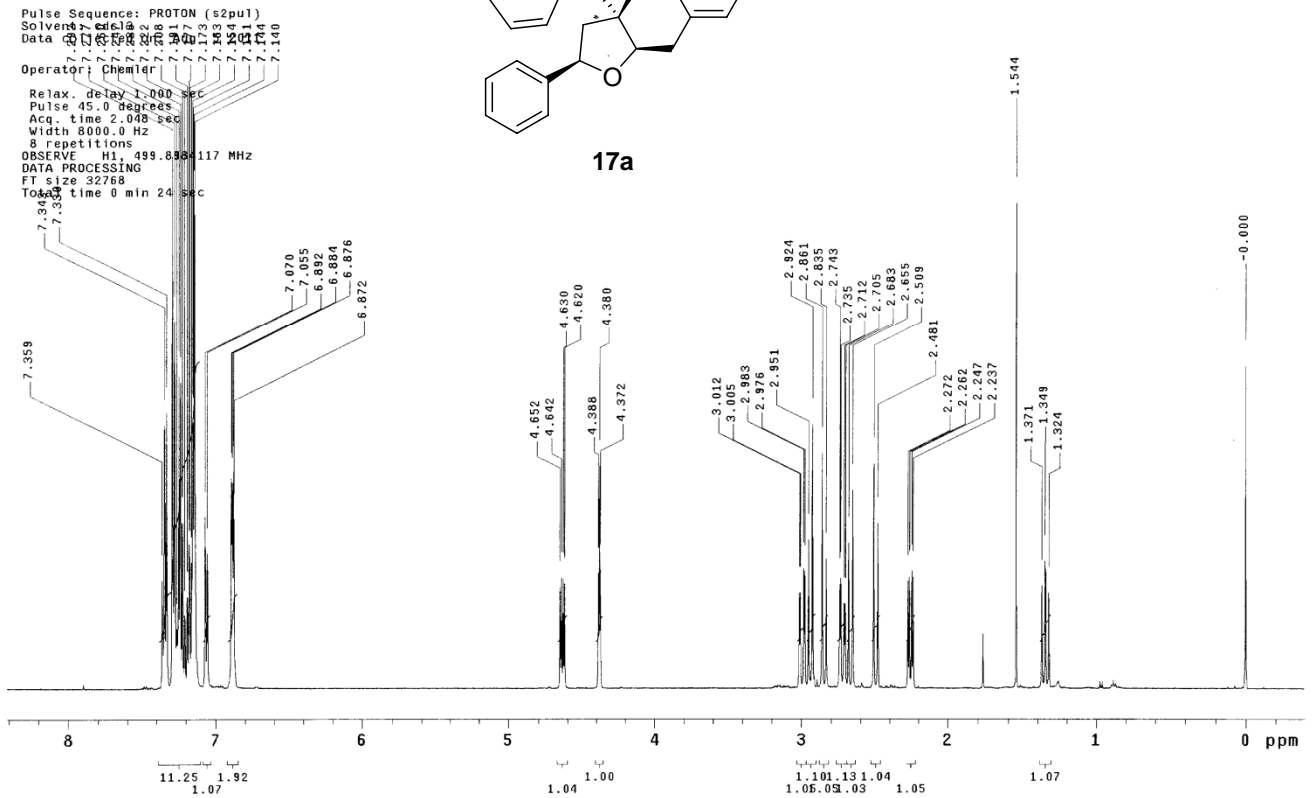

20110805dibenzylphenylproduct2bC13  
 Sample Name:  
 Data Collected on:  
 roesy.chem.buffalo.edu-mercury300  
 Archive directory:  
 Sample directory:  
 Fidfile: CARBON

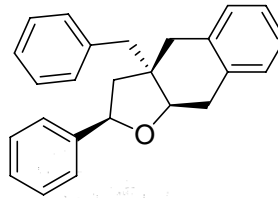

17a

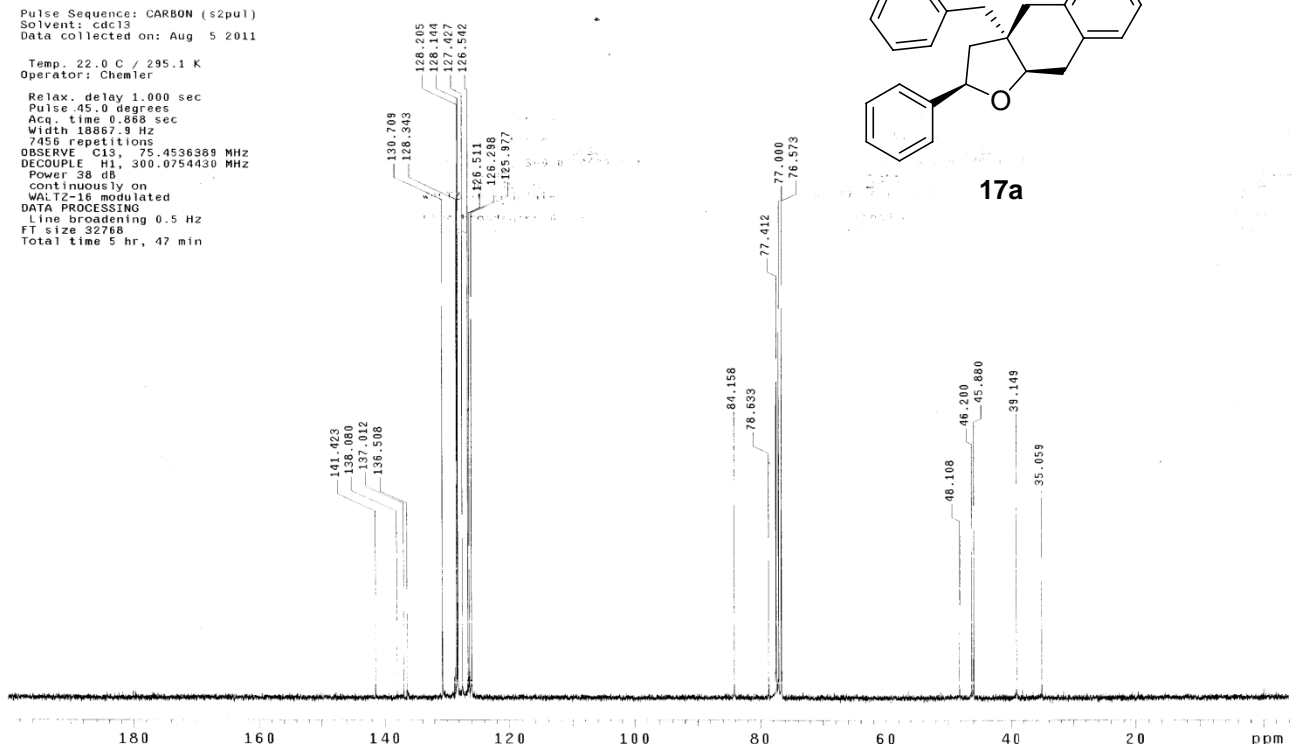



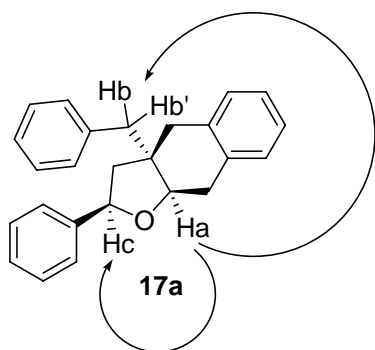

20110802dibenzylphenylproductL2NOE

Sample Name:

Data Collected on:  
chemmr500.chem.buffalo.edu-inova500

Archive directory:

Sample directory:

Filefile: NOESY10

Pulse Sequence: NOESY10  
Solvent: cdcl3  
Data collected on: Aug 2 2011

Operator: Chemler

Relax. delay 1.000 sec  
Pulse 90.0 degrees  
Acq. time 2.486 sec  
Width 3295.4 Hz  
8960 repetitions  
OBSERVE H1, 499.8983908 MHz  
DATA PROCESSING  
FT size 16384  
Total time 10 hr, 58 min

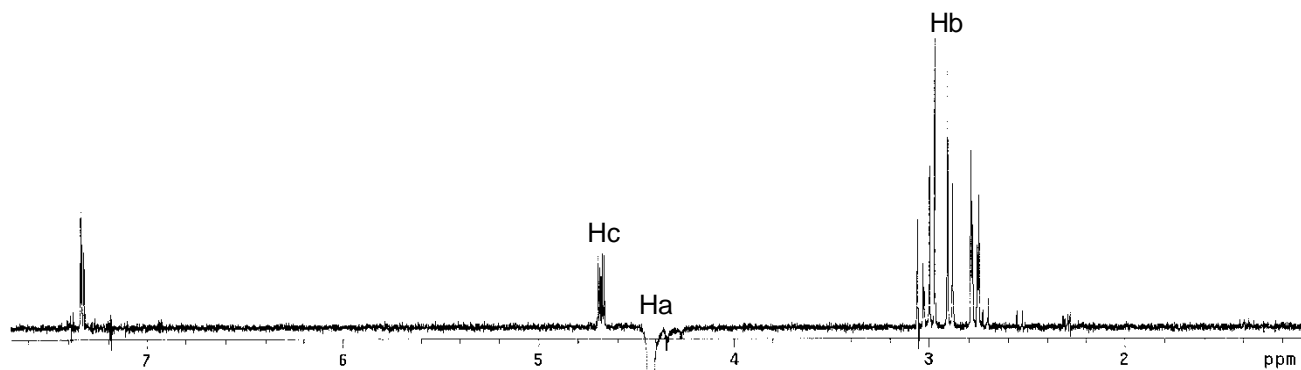

20110803dibenzylallylproduct1a

Sample Name:

Data Collected on: chemmr500.chem.buffalo.edu-inova500  
Archive directory:

Sample directory:

FidFile: PROTON

Pulse Sequence: PROTON (s2pu1)  
Solvent: cdcl3  
Data collected on: Aug 3 2011

Operator: Chemler

Relax. delay 1.000 sec  
Pulse 45.0 degrees  
Acq. time 2.048 sec  
Width 8000.0 Hz  
8 repetitions  
OBSERVE H1, 499.8984122 MHz  
DATA PROCESSING  
FT size 32768  
Total time 0 min 24 sec

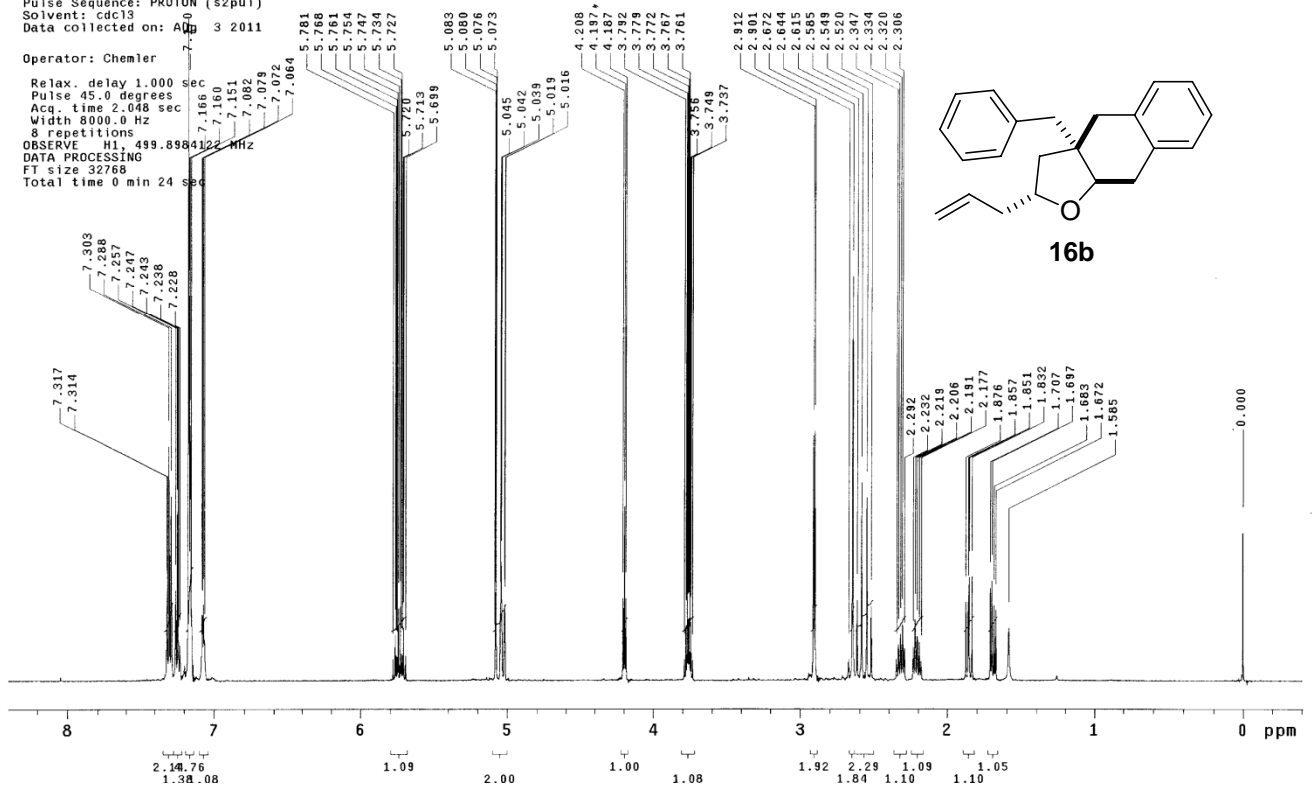

20110803dibenzylallylproduct1aC13

Sample Name:

Data Collected on: roesy.chem.buffalo.edu-mercury300  
Archive directory:

Sample directory:

FidFile: CARBON

Pulse Sequence: CARBON (s2pu1)  
Solvent: cdcl3  
Data collected on: Aug 3 2011

Temp. 22.0 C / 295.1 K  
Operator: Chemler

Relax. delay 1.000 sec  
Pulse 45.0 degrees  
Acq. time 0.868 sec  
Width 18867.9 Hz  
5472 repetitions  
OBSERVE C13, 75.4536389 MHz  
DECOUPLE H1, 300.0754430 MHz  
Power 38 dB  
continuously on  
WALTZ-16 modulated  
DATA PROCESSING  
Line Broadening 0.5 Hz  
FT size 32768  
Total time 5 hr, 47 min

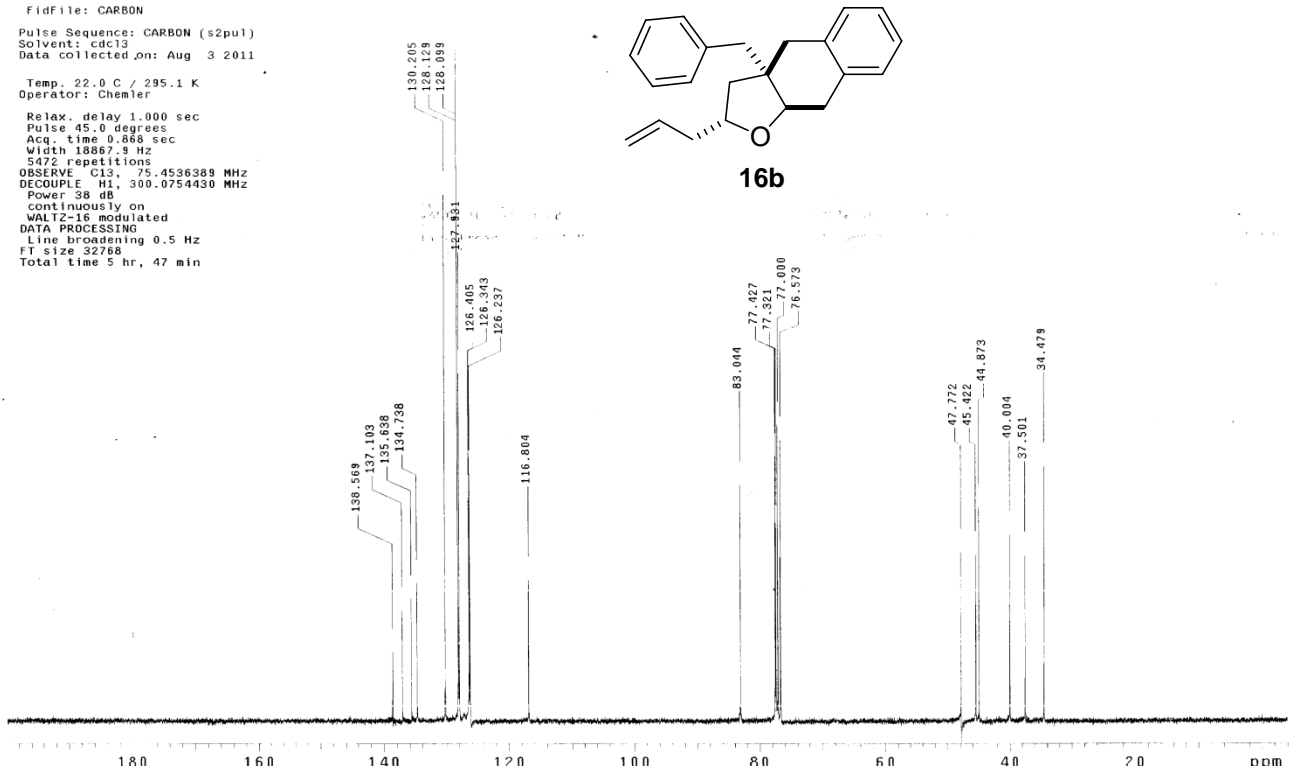

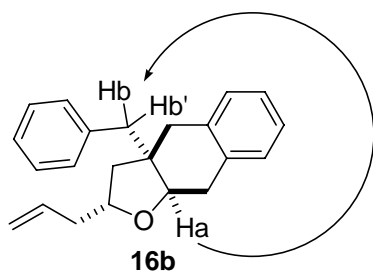

20110803dibenzylallylproduct1aNOE

Sample Name:

Data Collected on:  
chemnmr500.chem.buffalo.edu-inova500

Archive directory:

Sample directory:

FidFile: NOESY1D

Pulse Sequence: NOESY1D  
Solvent: cdcl3  
Data collected on: Aug 3 2011

Operator: Chemler

Relax. delay 1.000 sec  
Pulse 90.0 degrees  
Acq. time 2.479 sec  
Width 3304.7 Hz  
9600 repetitions  
OBSERVE H1, 499.898300B MHz  
DATA PROCESSING  
F1 size 16384  
Total time 11 hr, 33 min

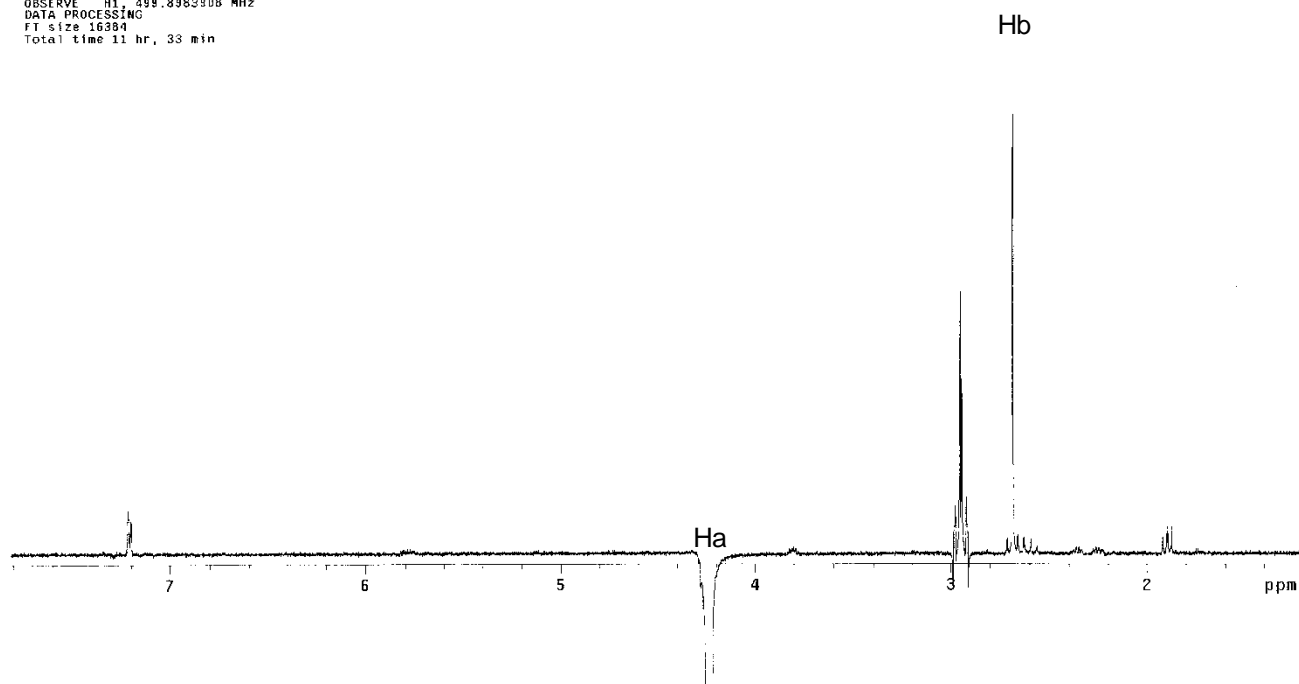

20110808dibenzylallylproduct2b

Sample Name:  
 Data Collected on:  
 chemnmr500.chem.buffalo.edu-inova500  
 Archive directory:  
 Sample directory:  
 FidFile: PROTON

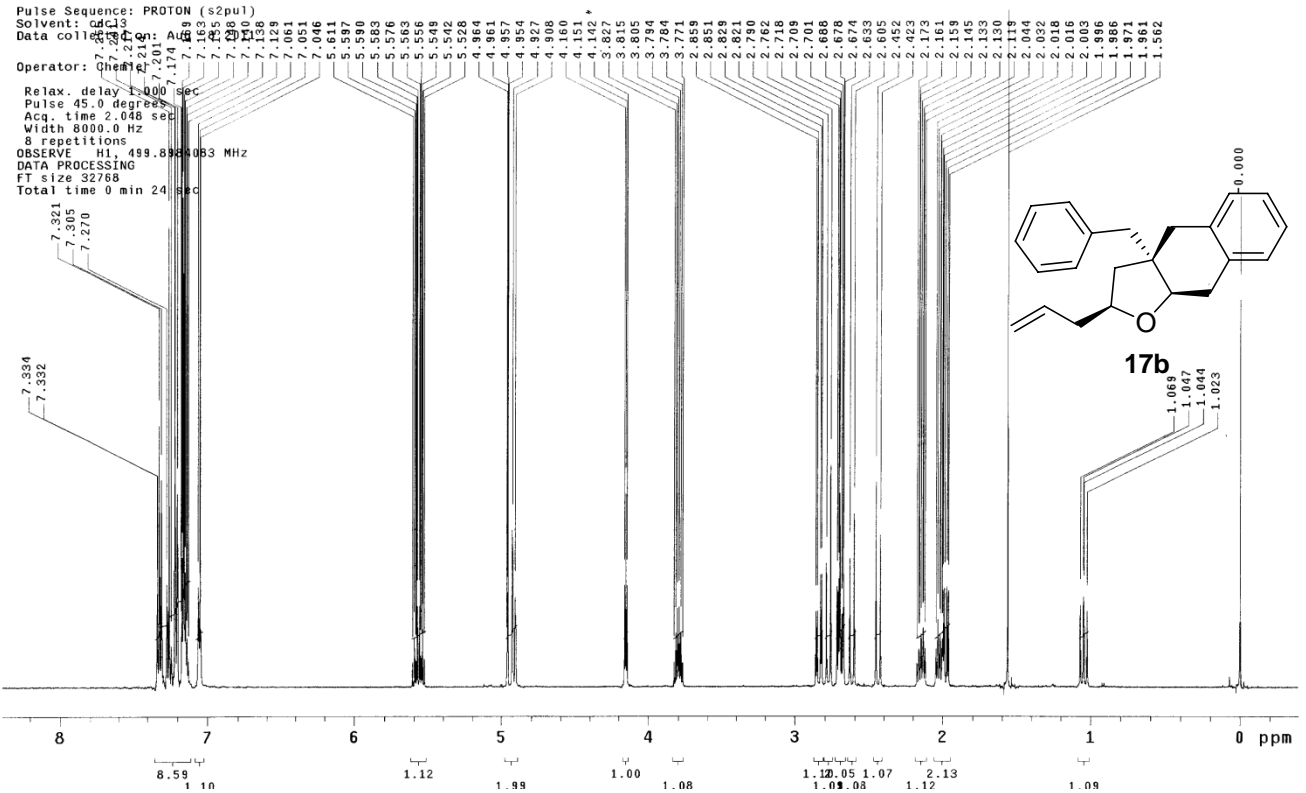

20110808dibenzylallylproduct2bC13

Sample Name:  
 Data Collected on:  
 roesy.chem.buffalo.edu-mercury300  
 Archive directory:  
 Sample directory:  
 FidFile: CARBON

Pulse Sequence: CARBON (s2pu1)  
 Solvent: cdcl3  
 Data collected on: Aug 8 2011

Temp. 22.0 C / 295.1 K  
 Operator: Chemler  
 Relax. delay 1.000 sec  
 Pulse 45.0 degrees  
 Acq. time 0.868 sec  
 Width 18867.9 Hz  
 7232 repetitions  
 OBSERVE C13, 75.4536377 MHz  
 DECOUPLE H1, 300.0754430 MHz  
 Power 38 dB  
 continuously on  
 WALTZ-16 modulated  
 DATA PROCESSING  
 Line broadening 0.5 Hz  
 FT size 32768  
 Total time 5 hr, 47 min

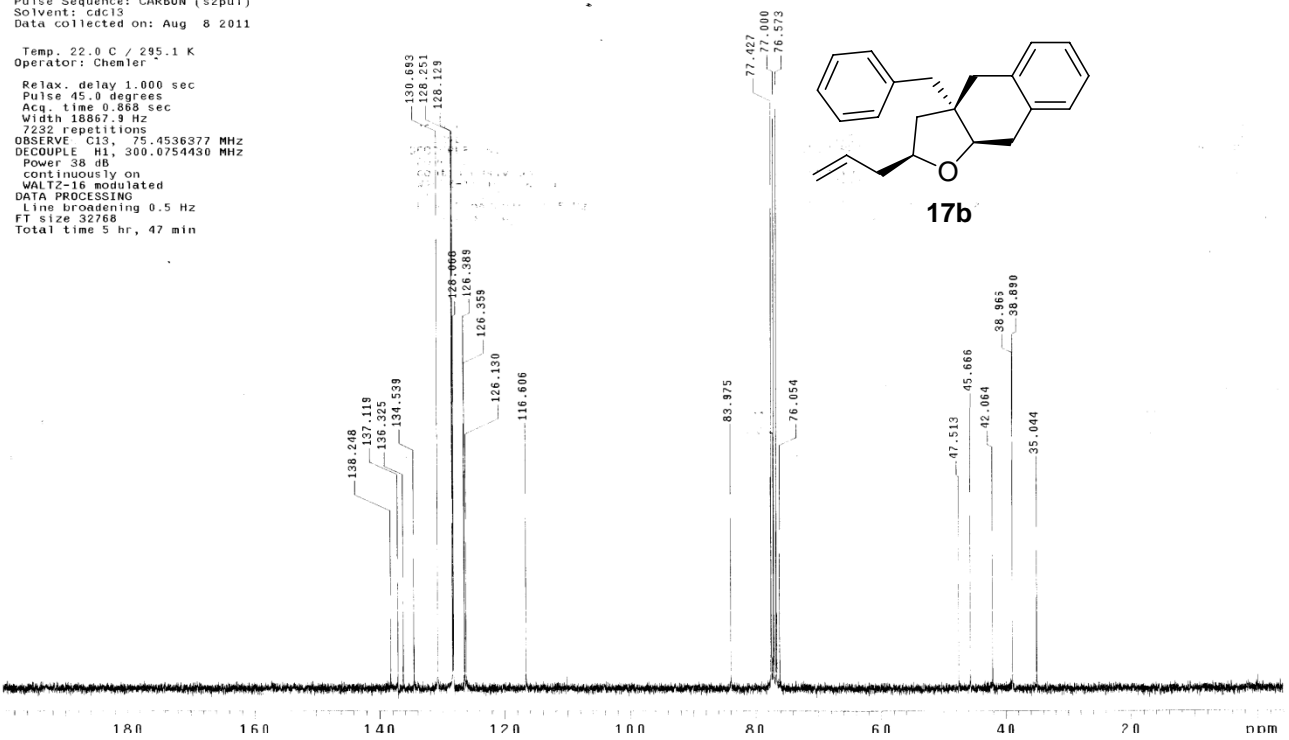

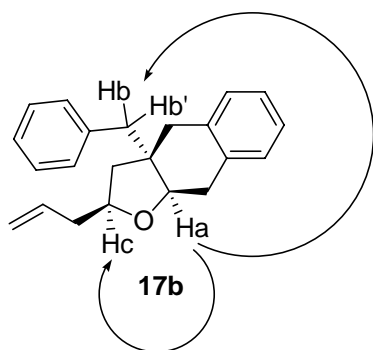

20110804dibenzylallylproduct2bNOE

Sample Name:

Data Collected on:  
chemmr500.chem.buffalo.edu-inova500

Archive directory:

Sample directory:

FidFile: NOESY1D

Pulse Sequence: NOESY1D  
Solvent: cdcl3  
Data collected on: Aug 4 2011

Operator: Chemter

Relax. delay 1.000 sec  
Pulse 90.0 degrees  
Acq. time 2.284 sec  
Width 3586.8 Hz  
4088 repetitions  
OBSERVE H1, 499.8983908 MHz  
DATA PROCESSING  
FT size 16384  
Total time 10 hr, 23 min

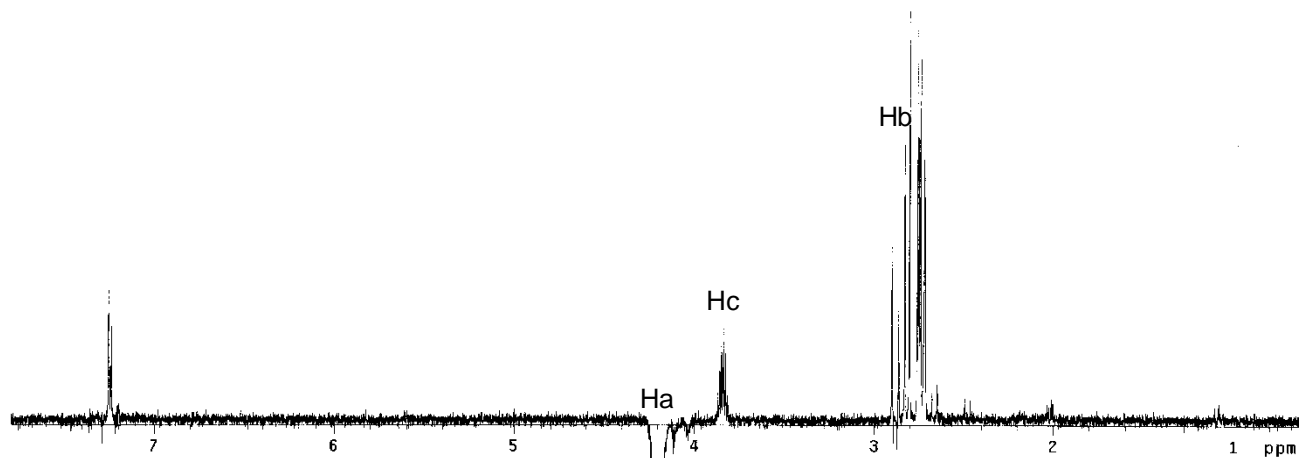

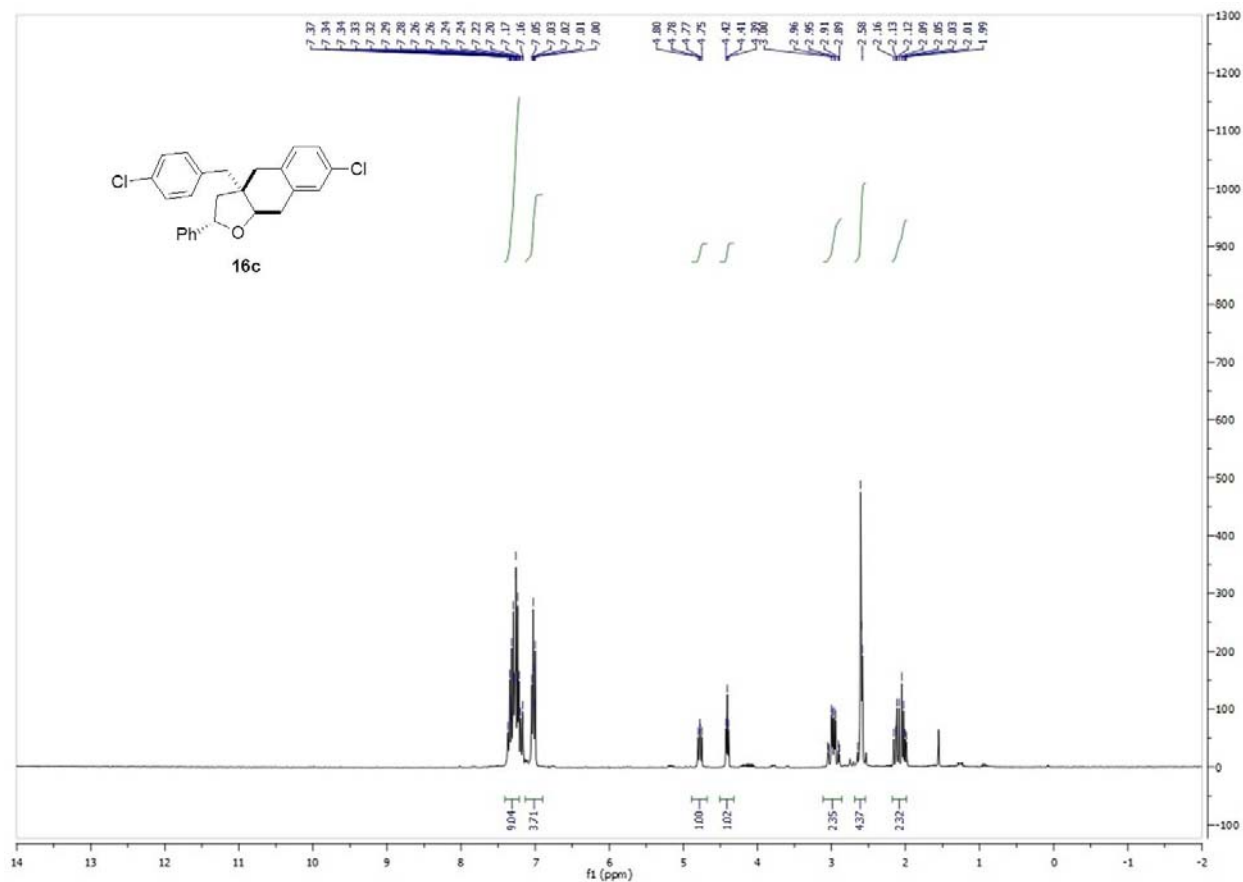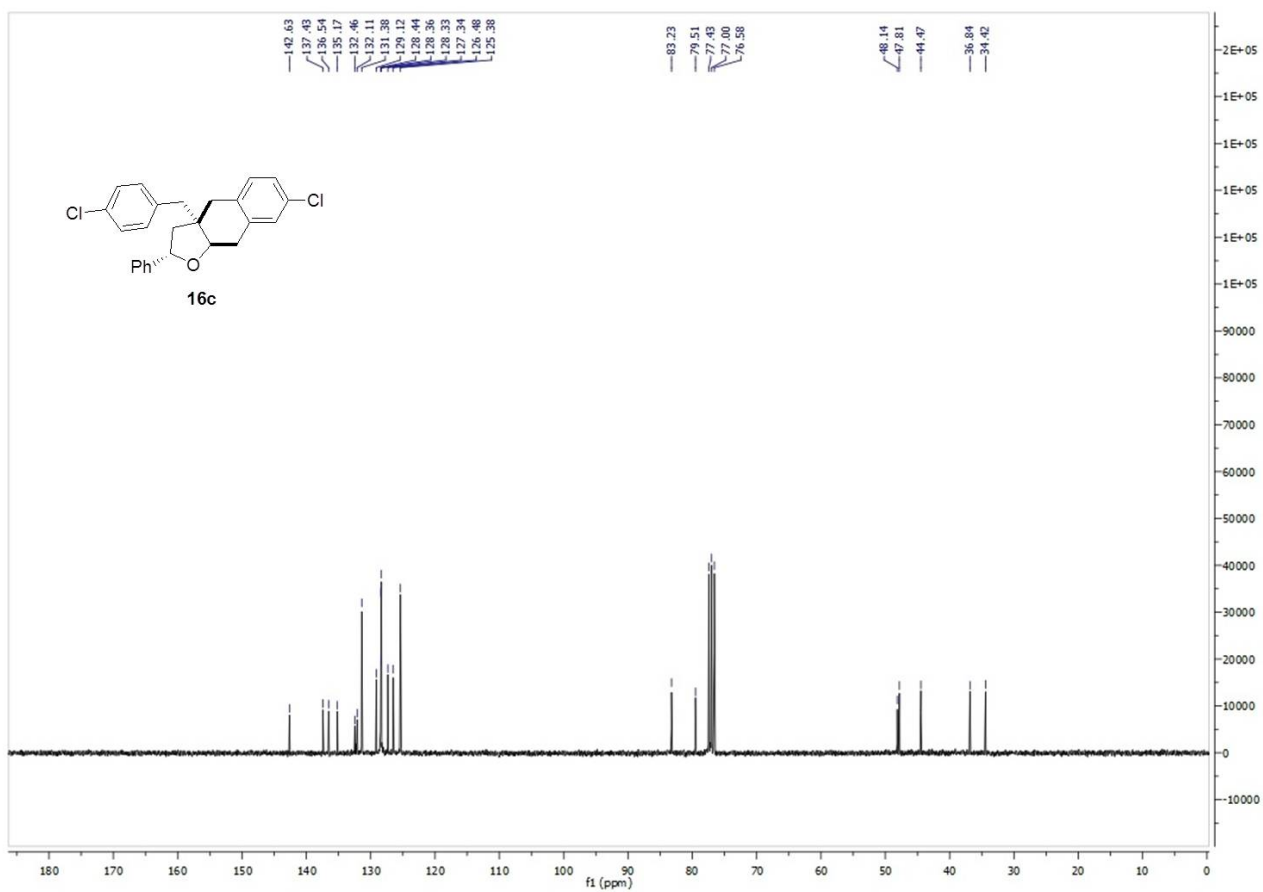

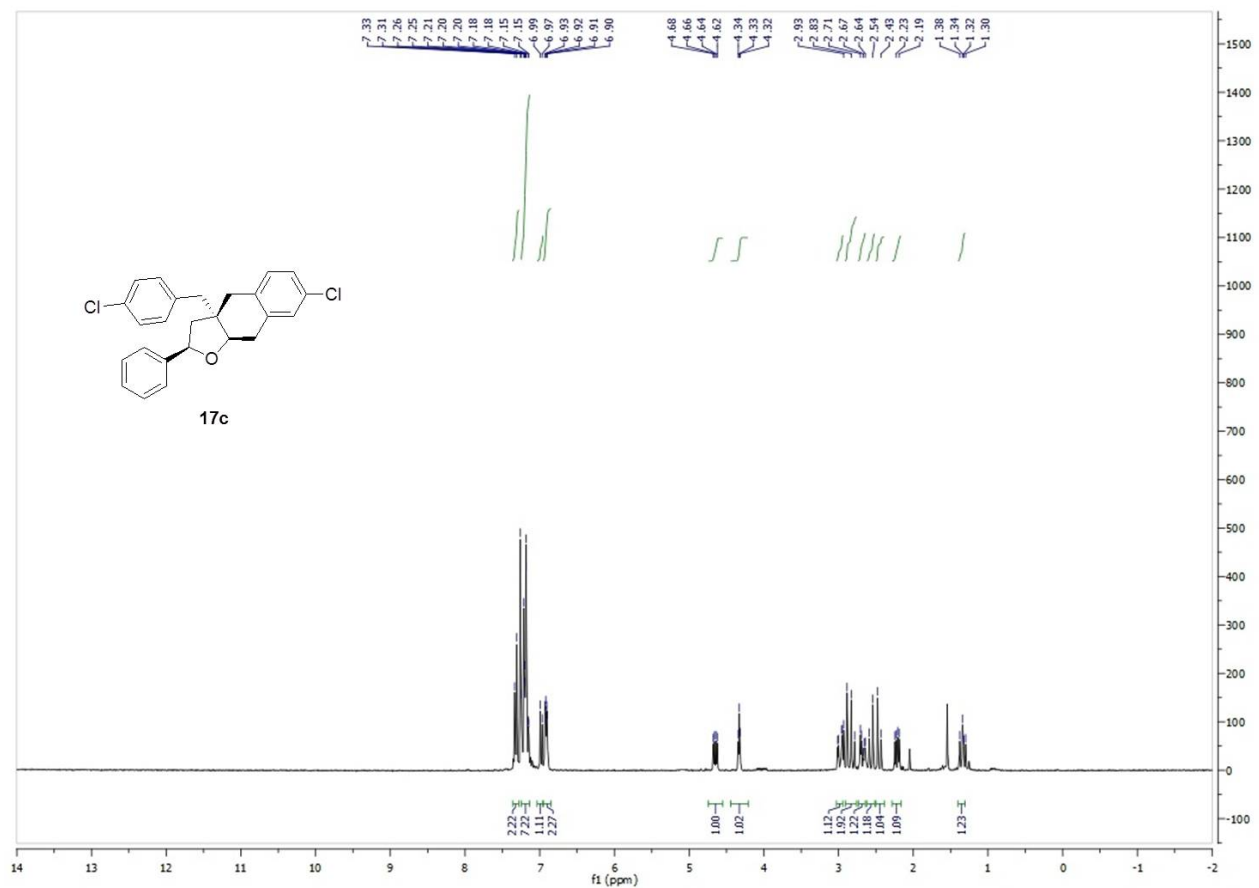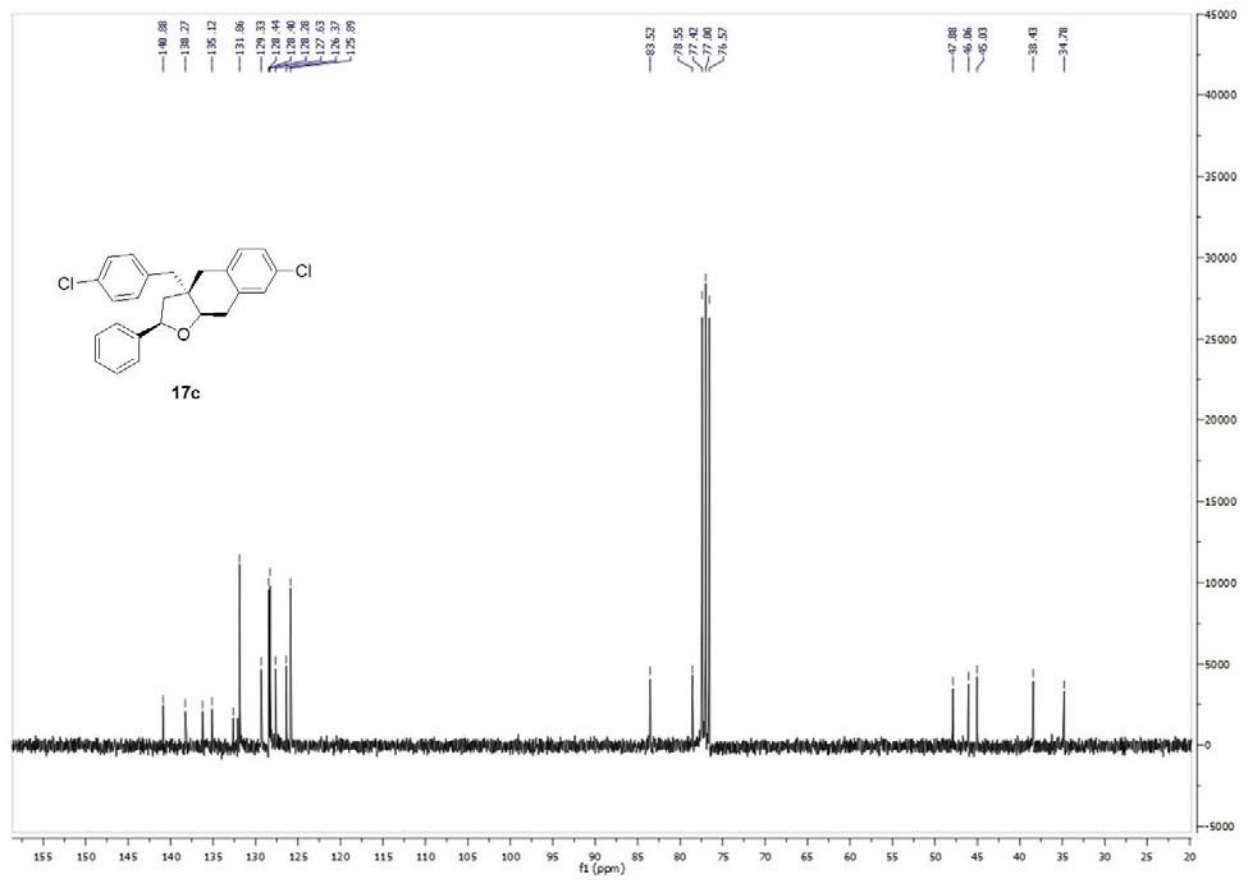

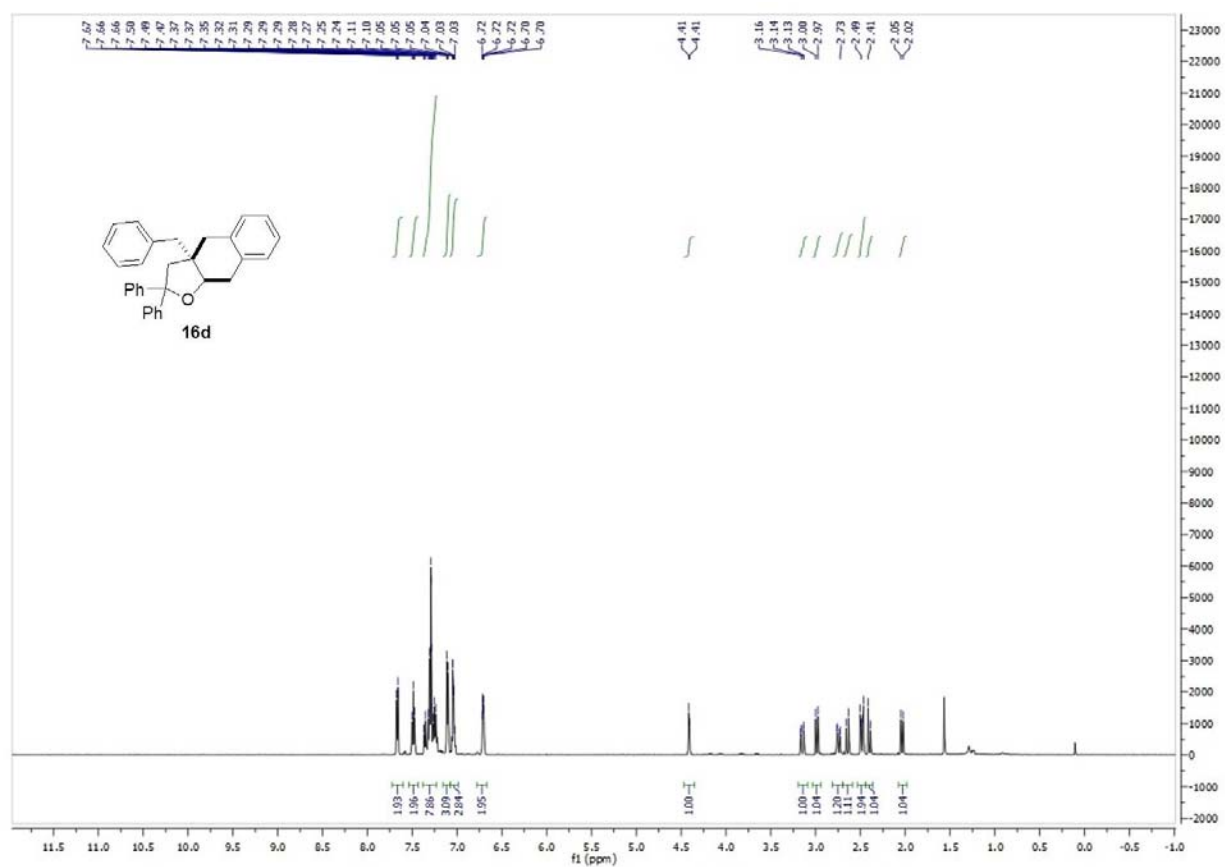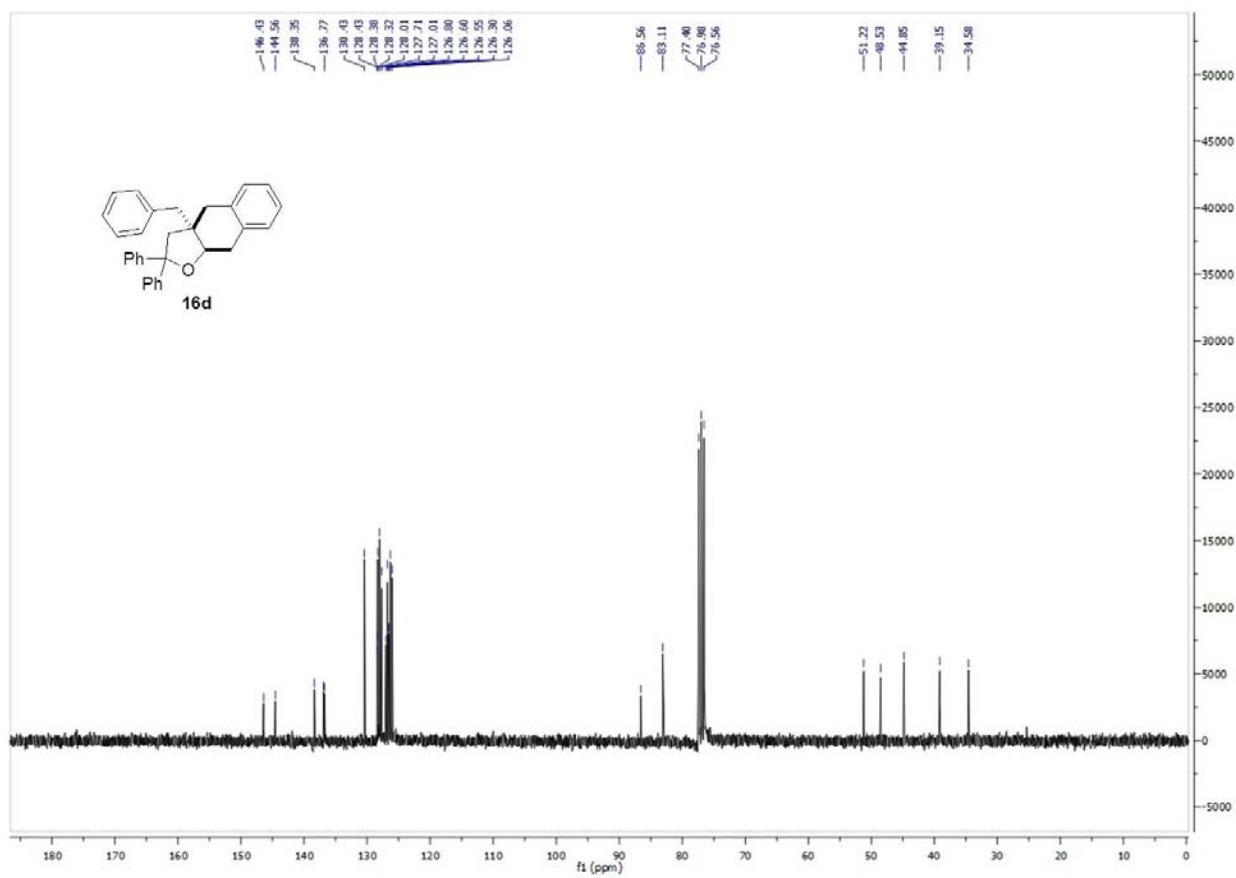





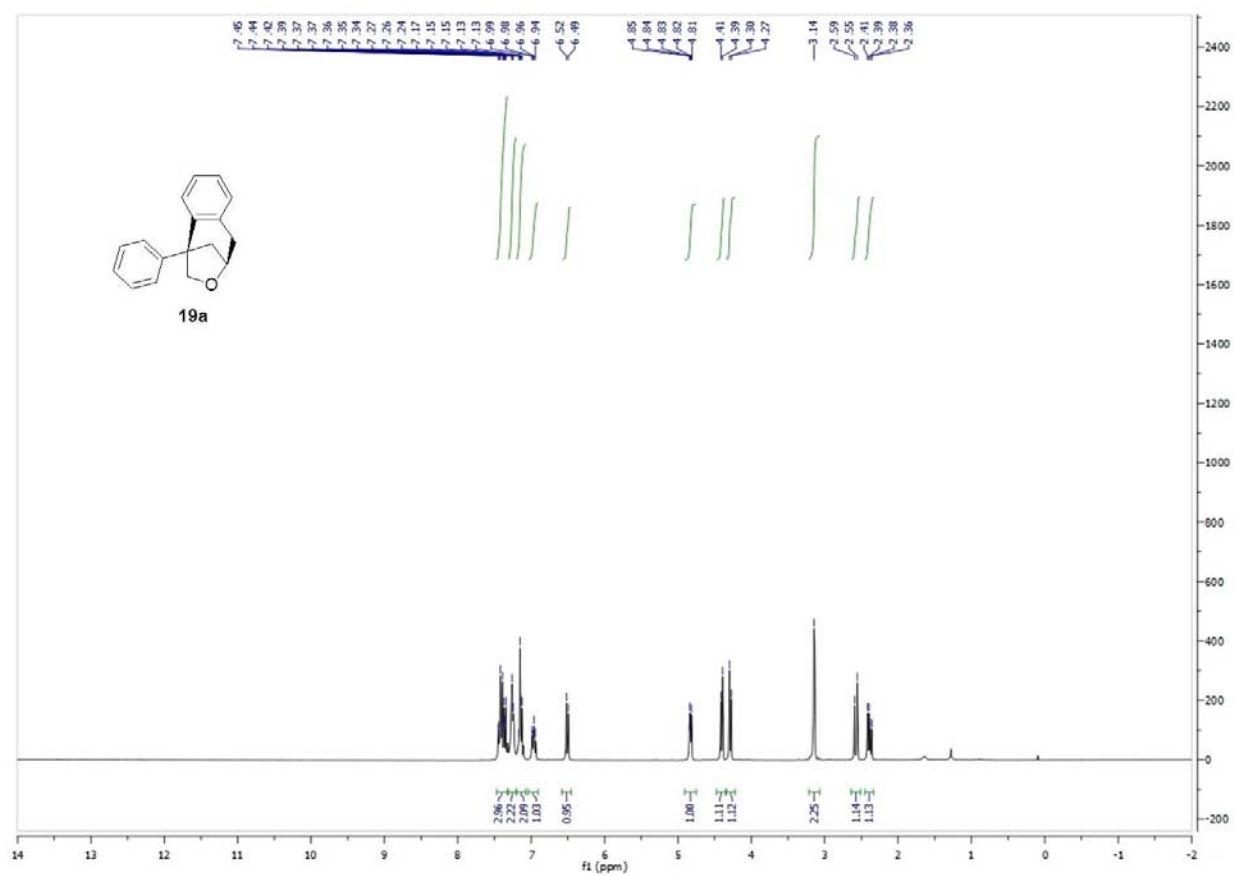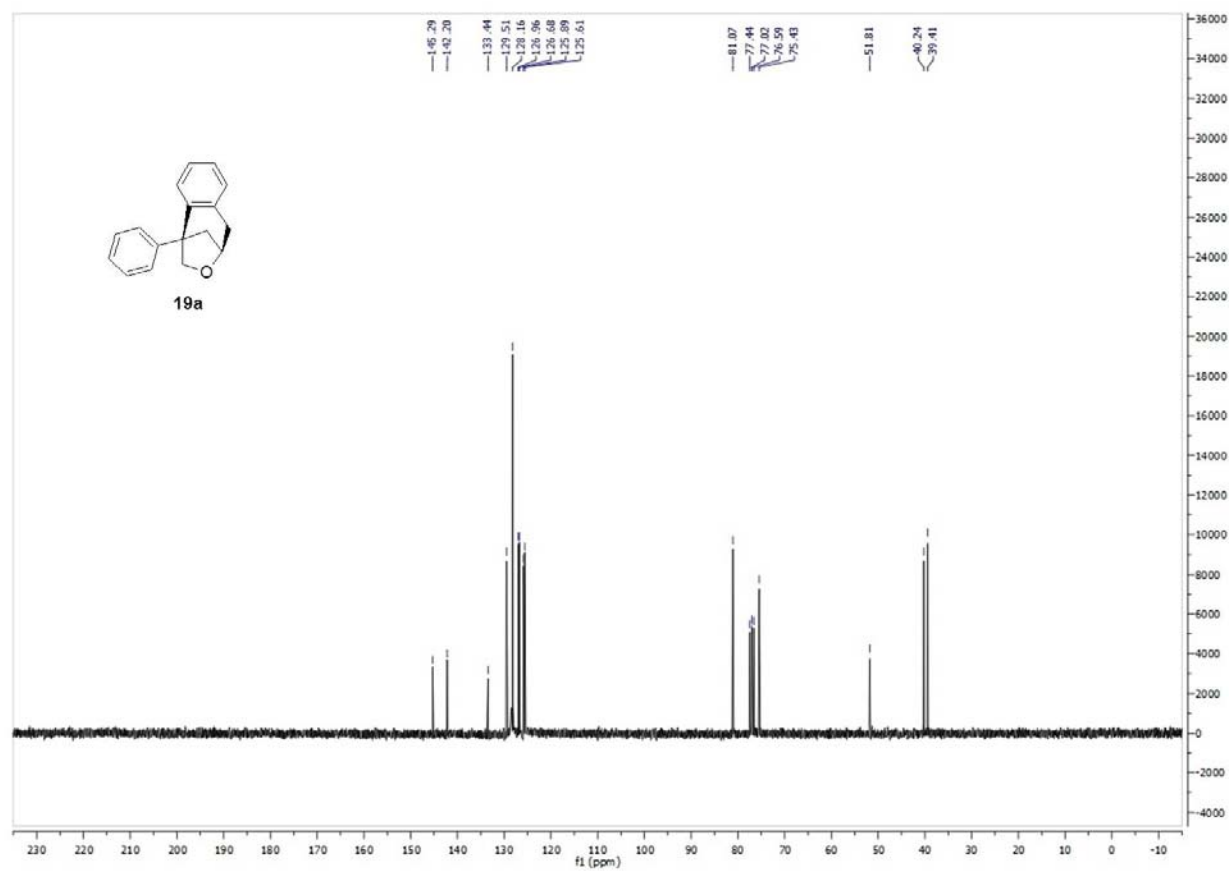

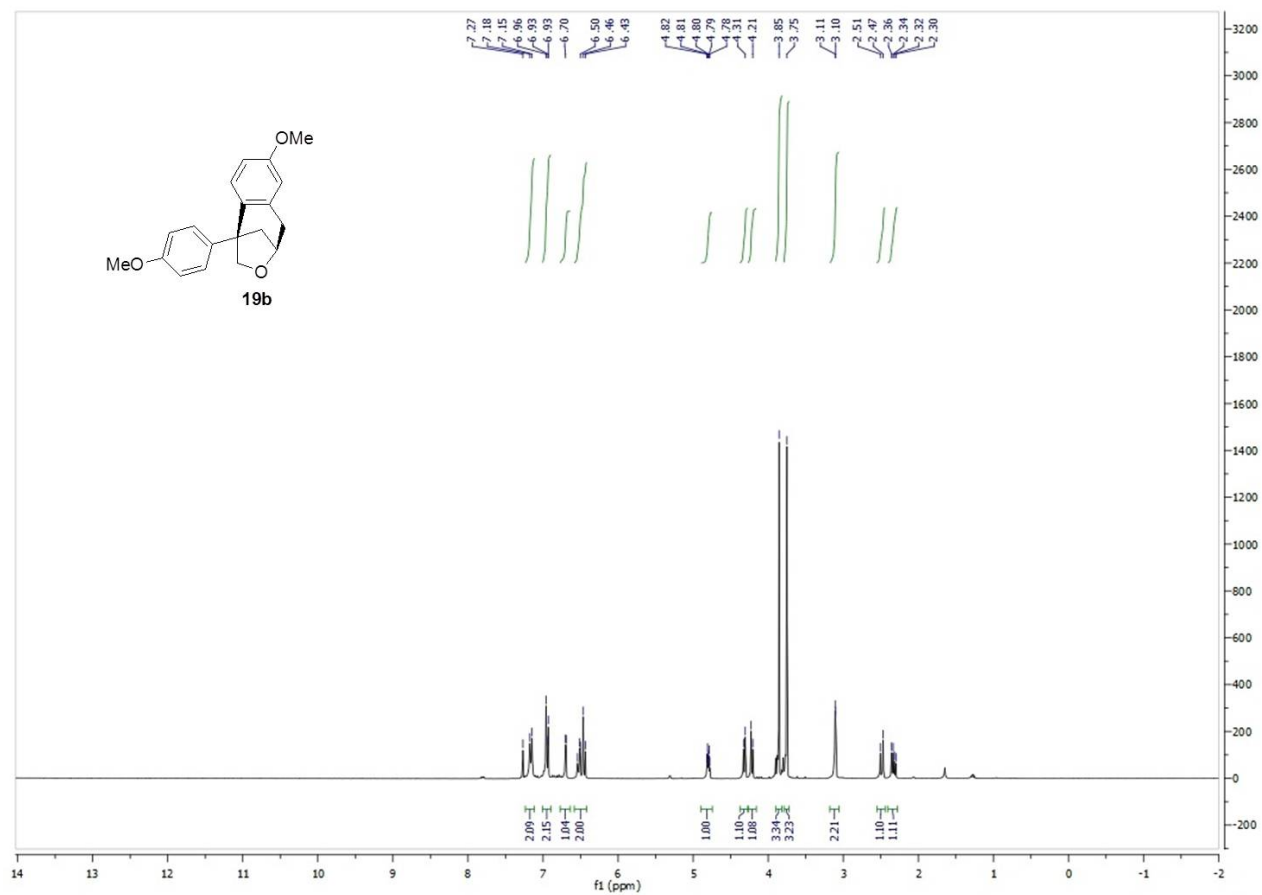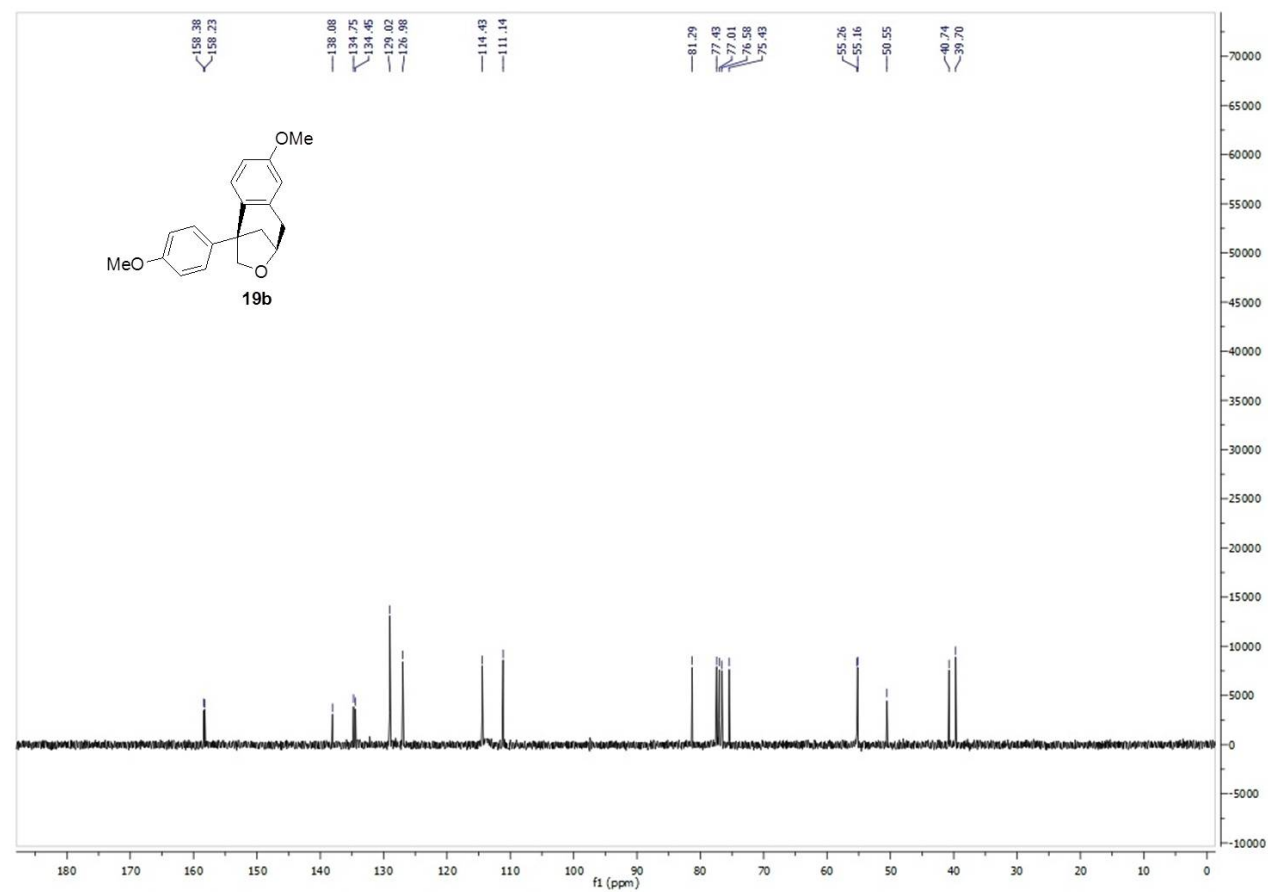

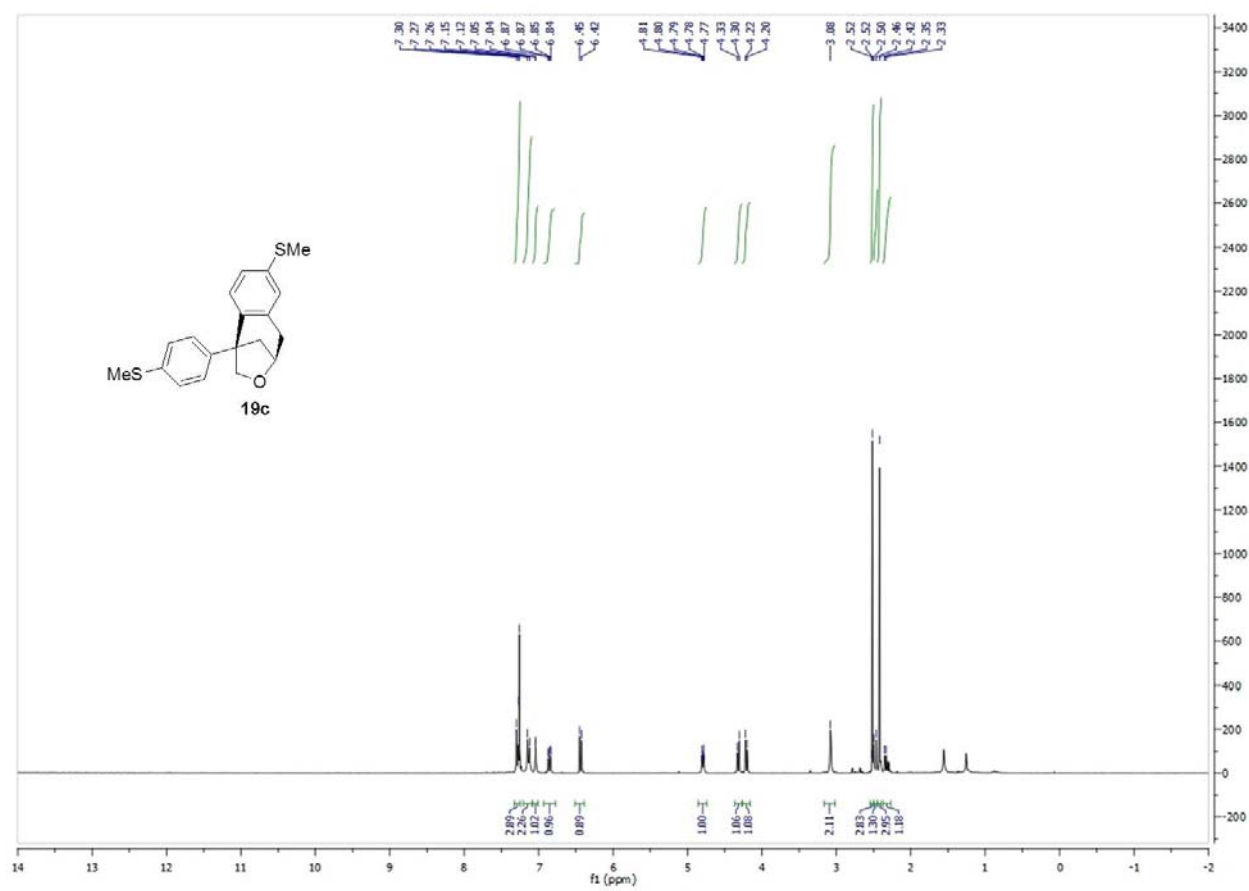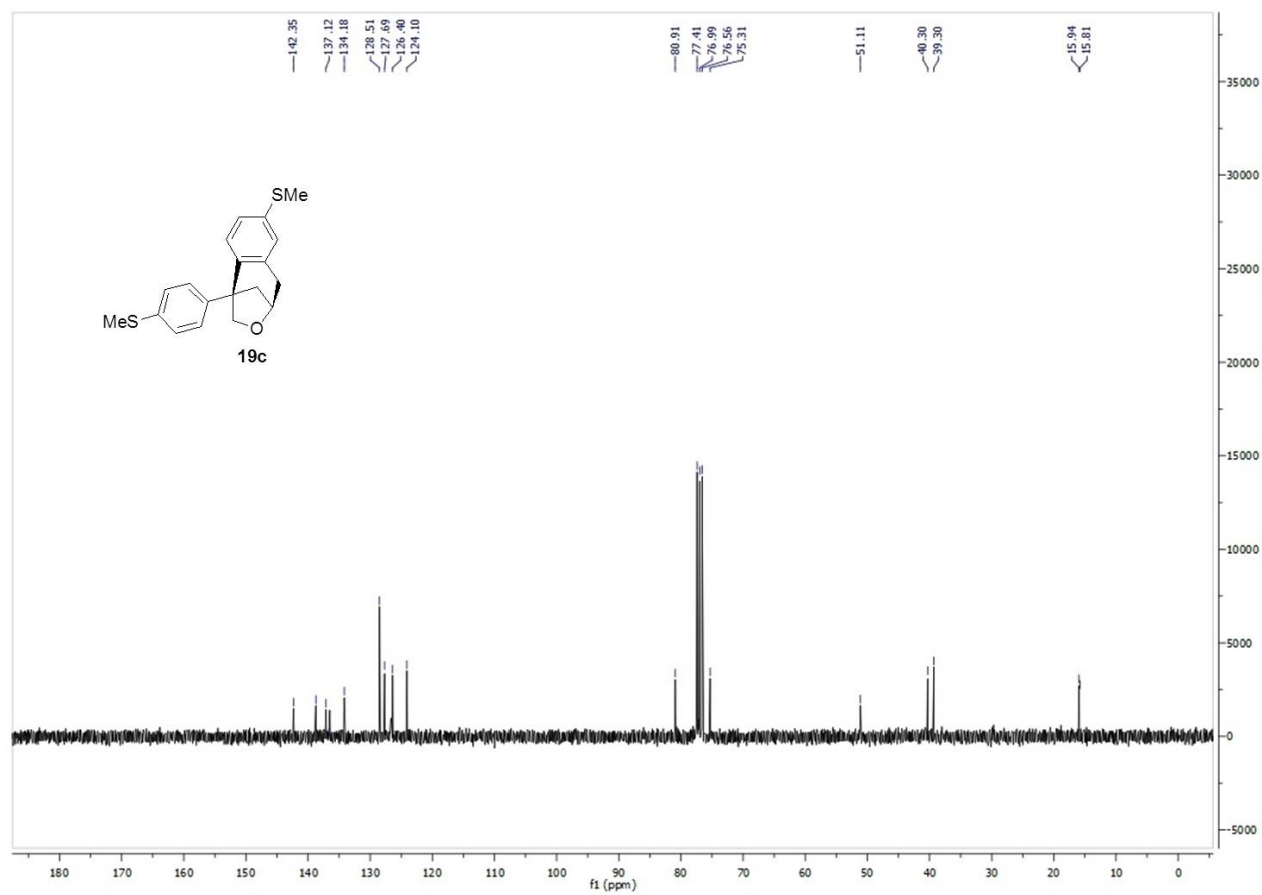

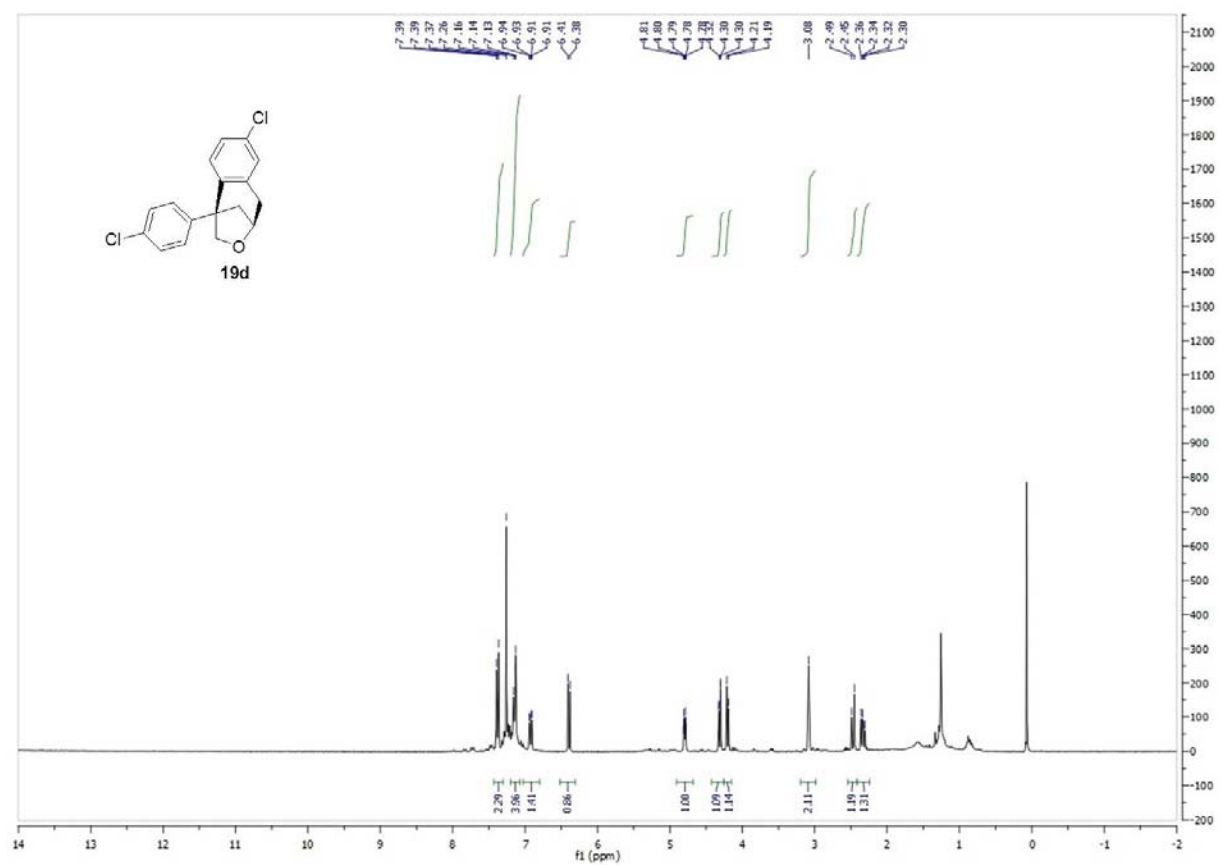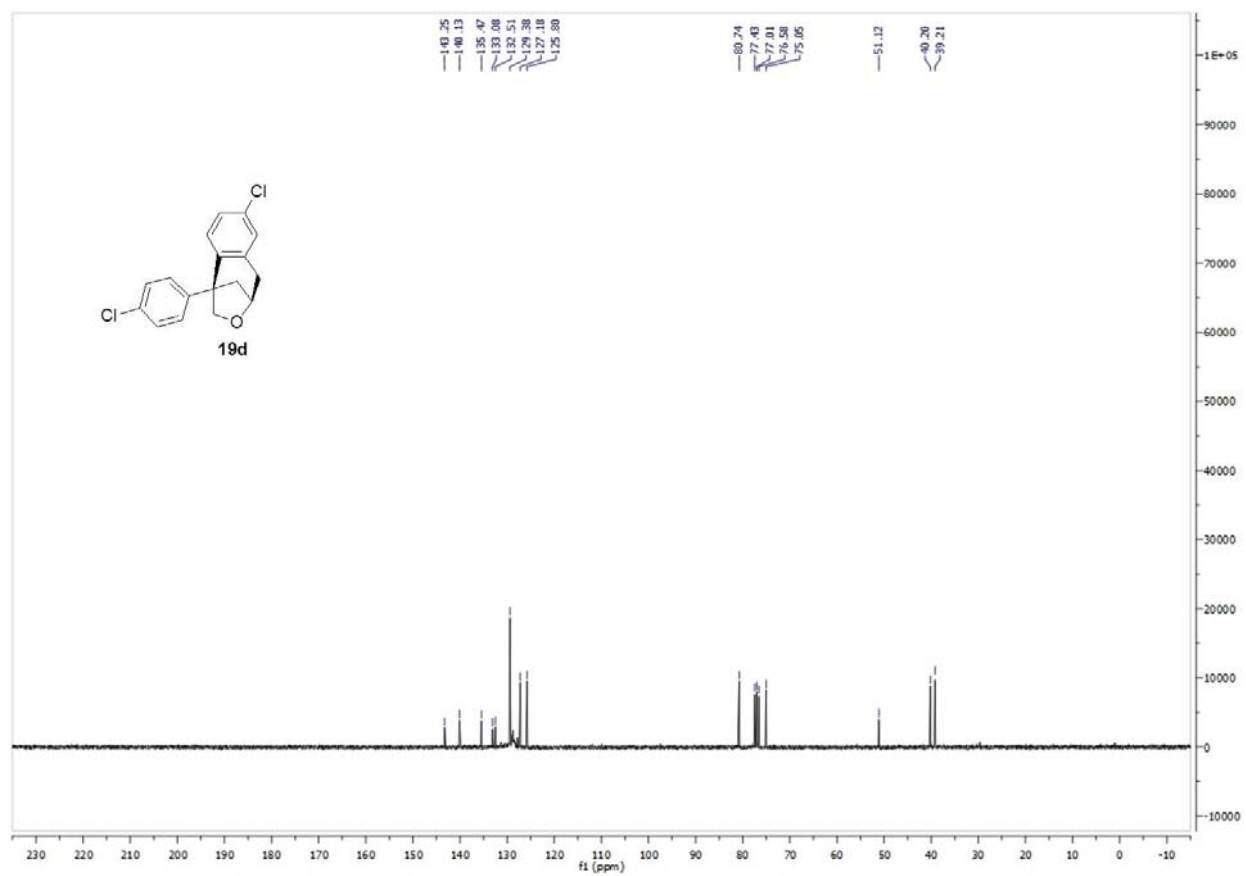

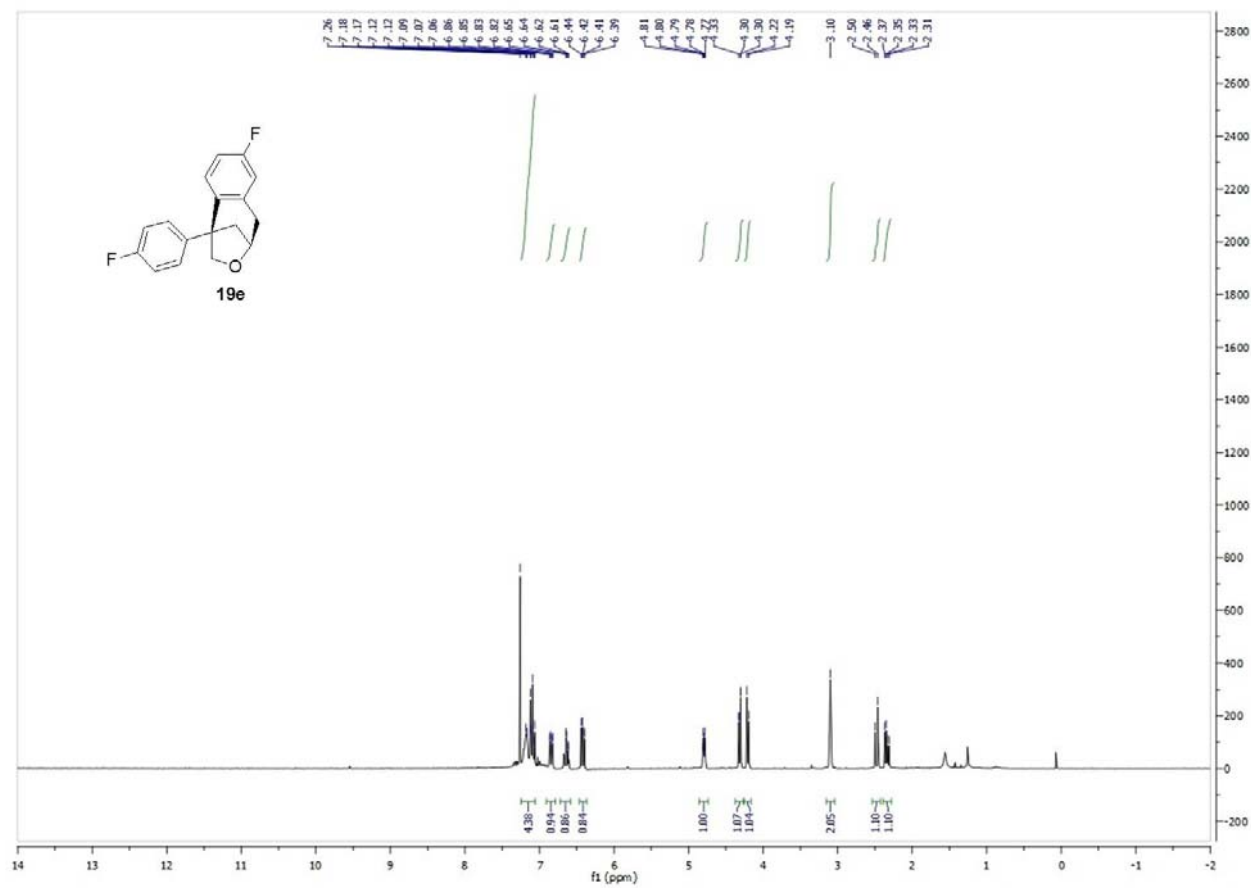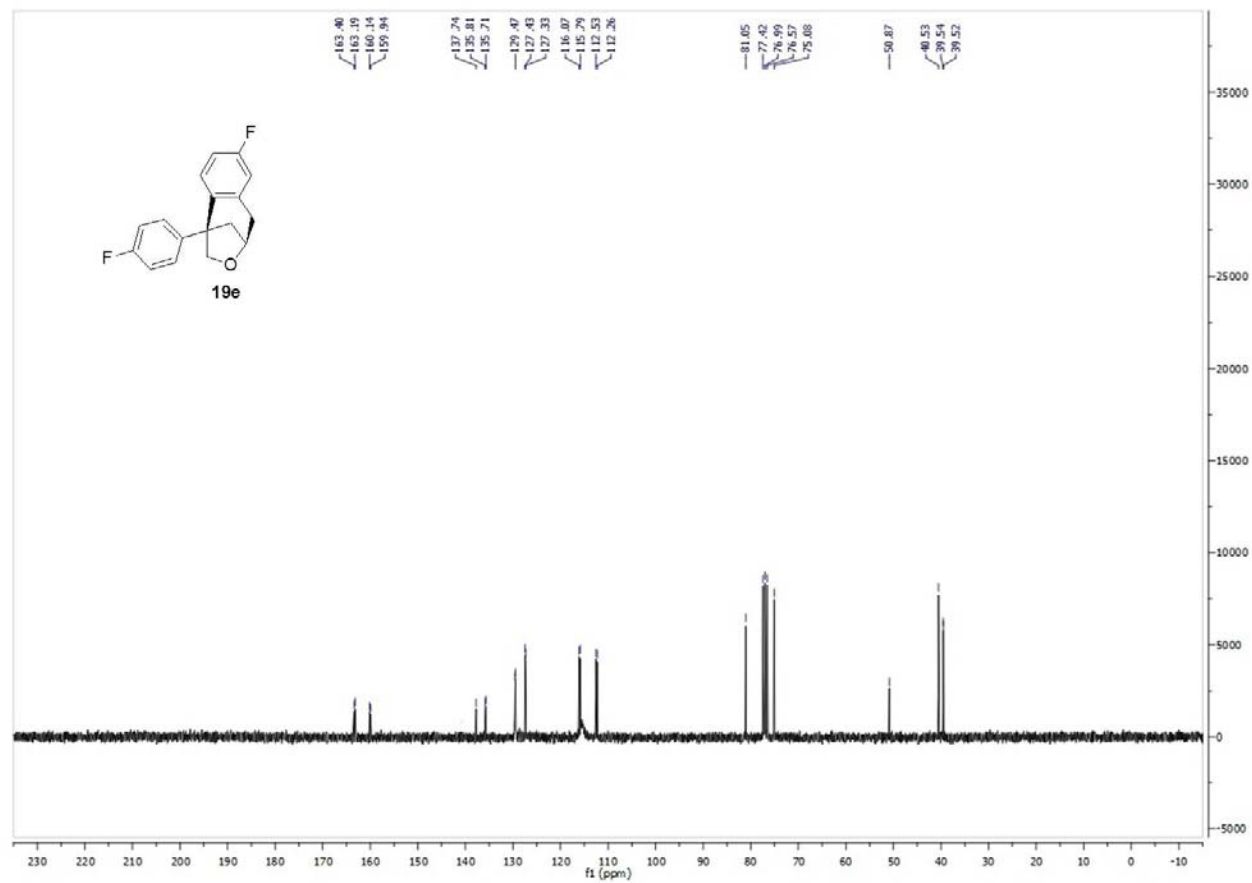

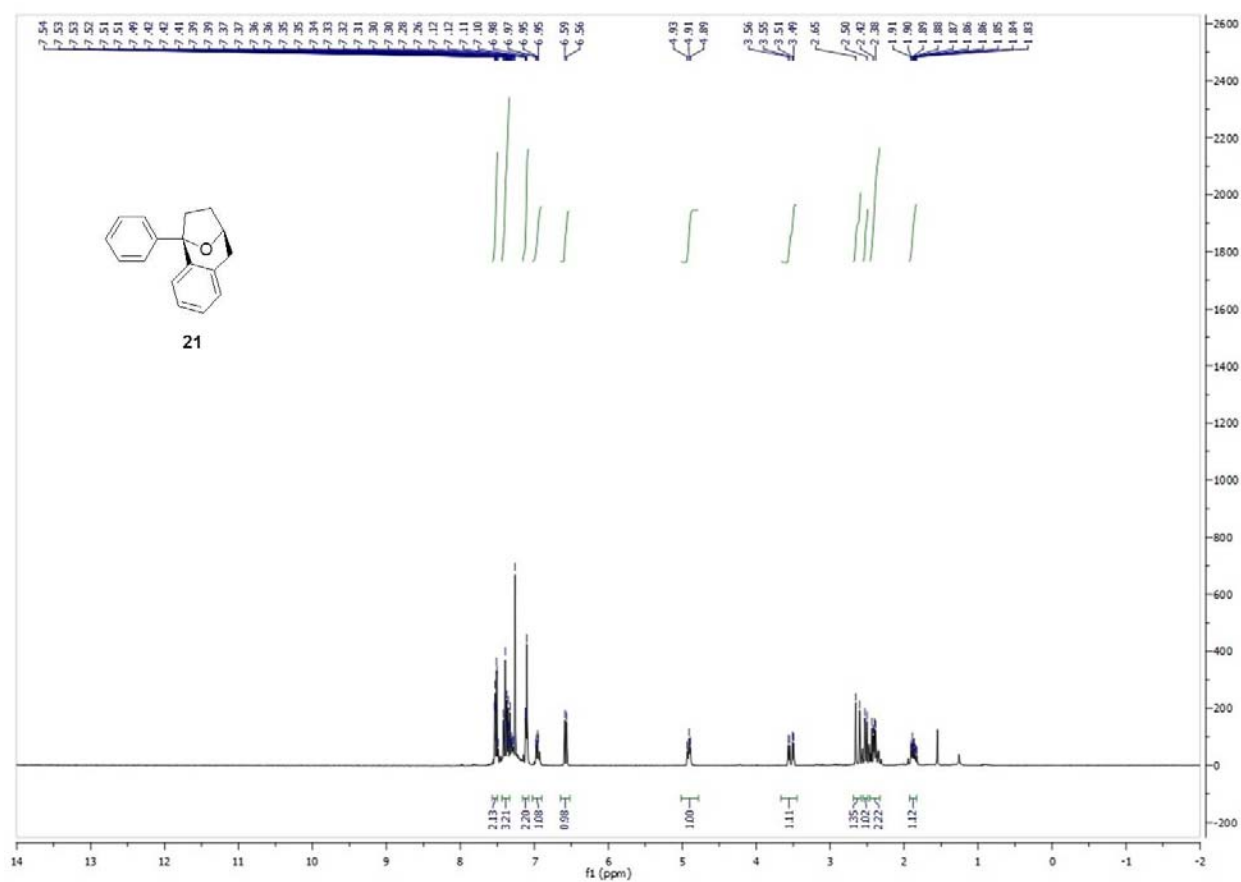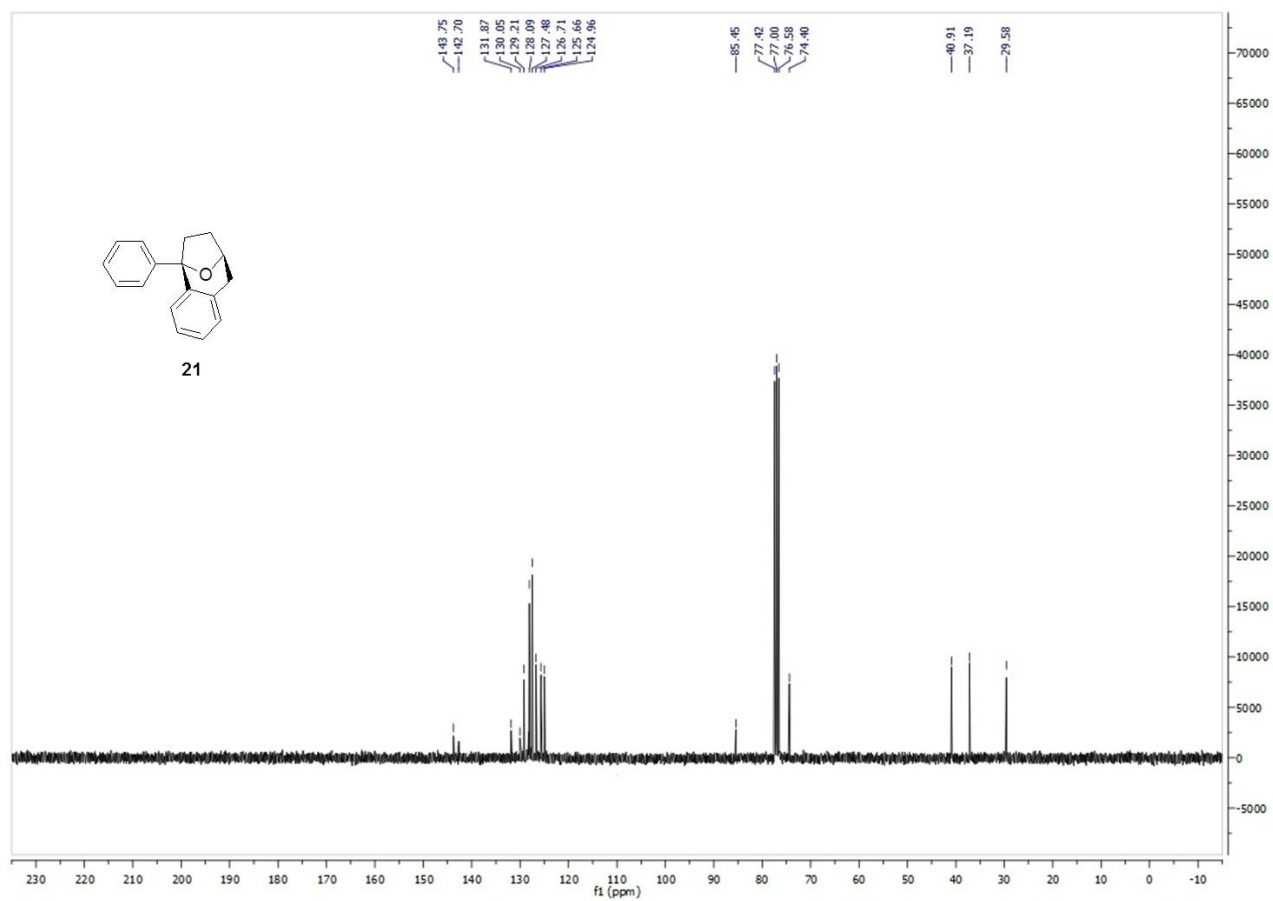

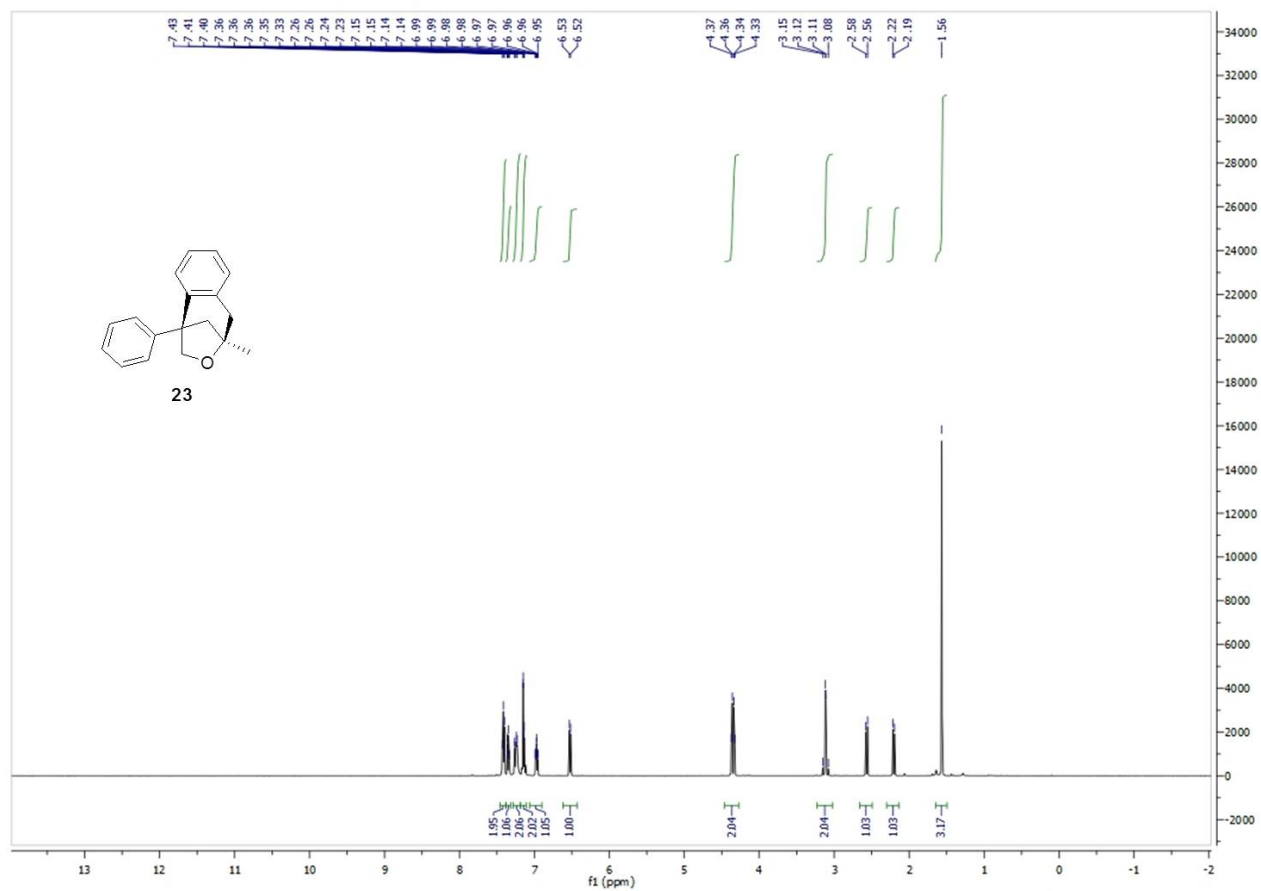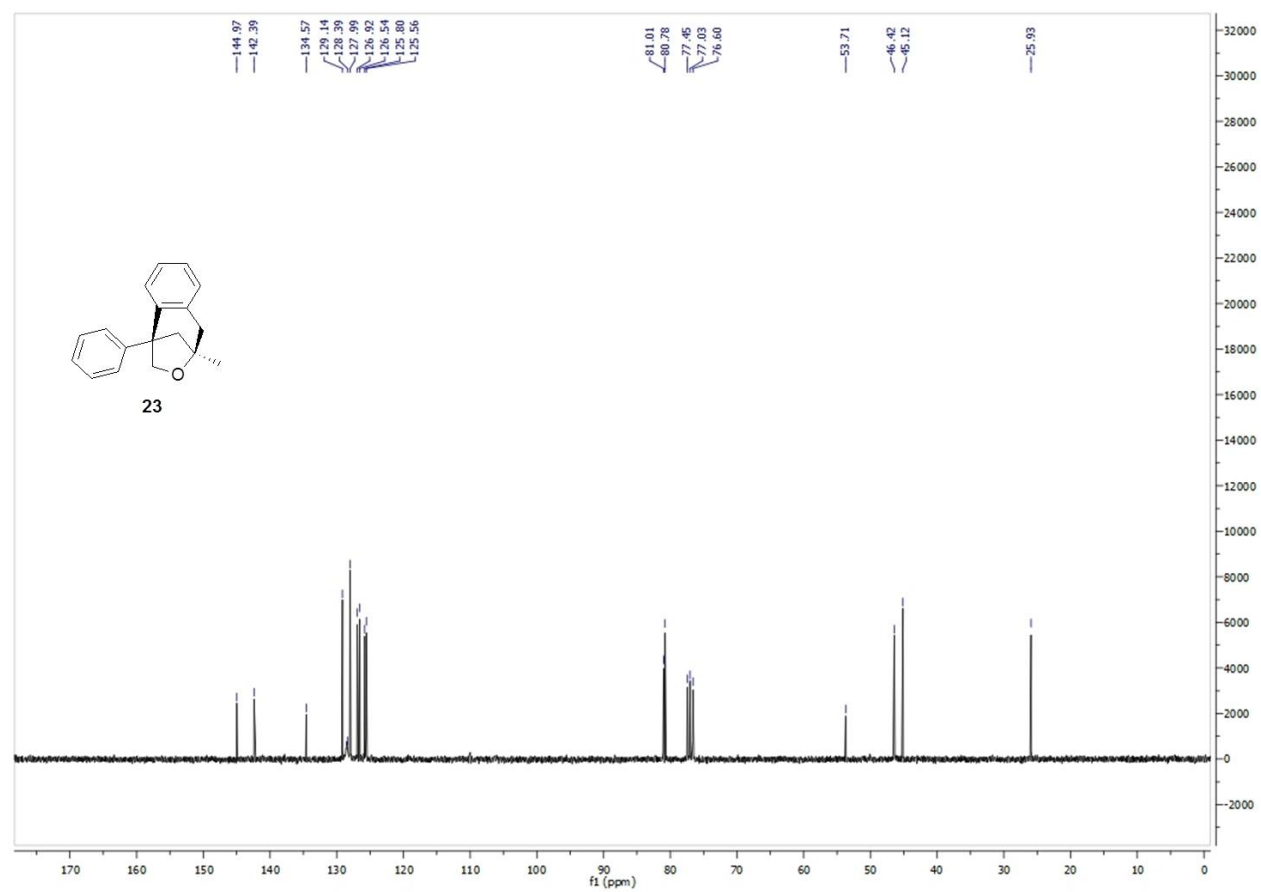



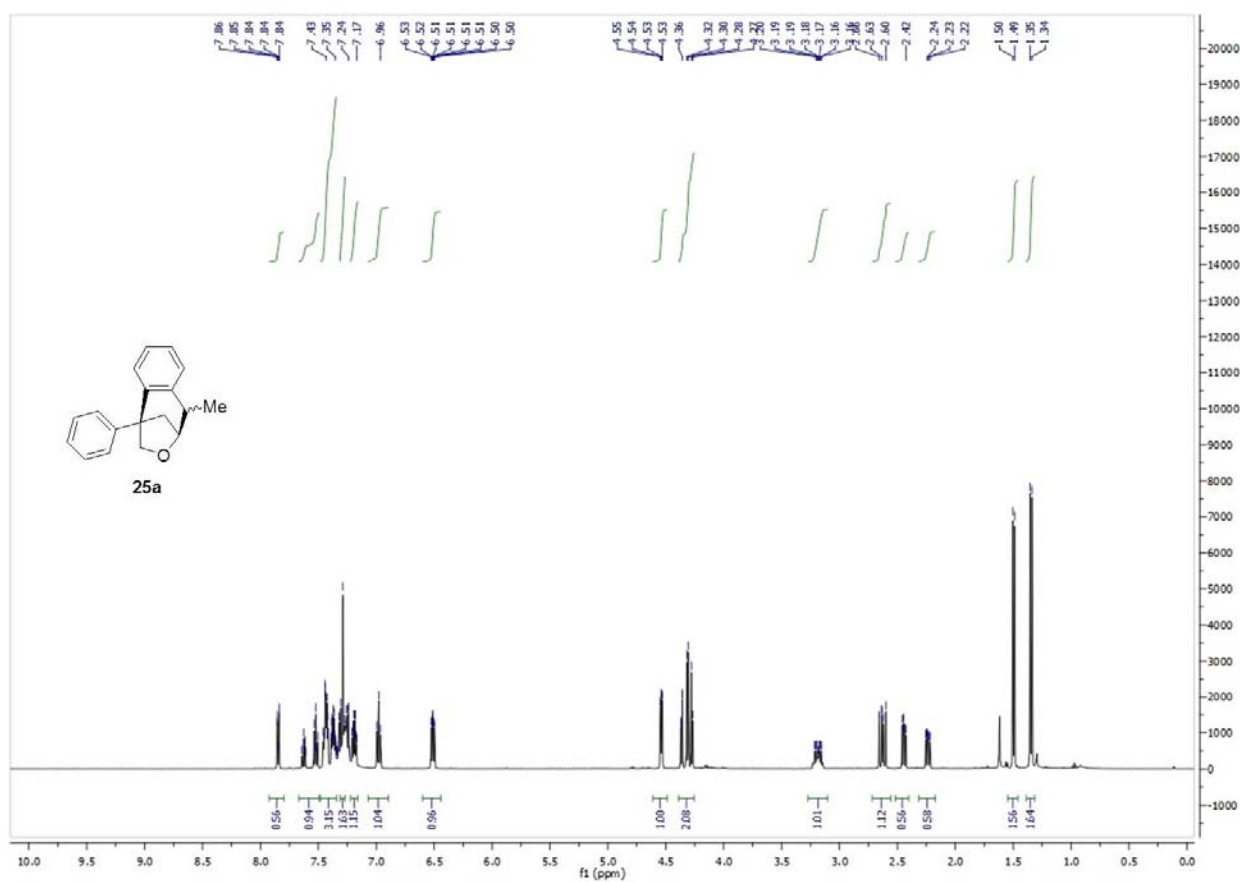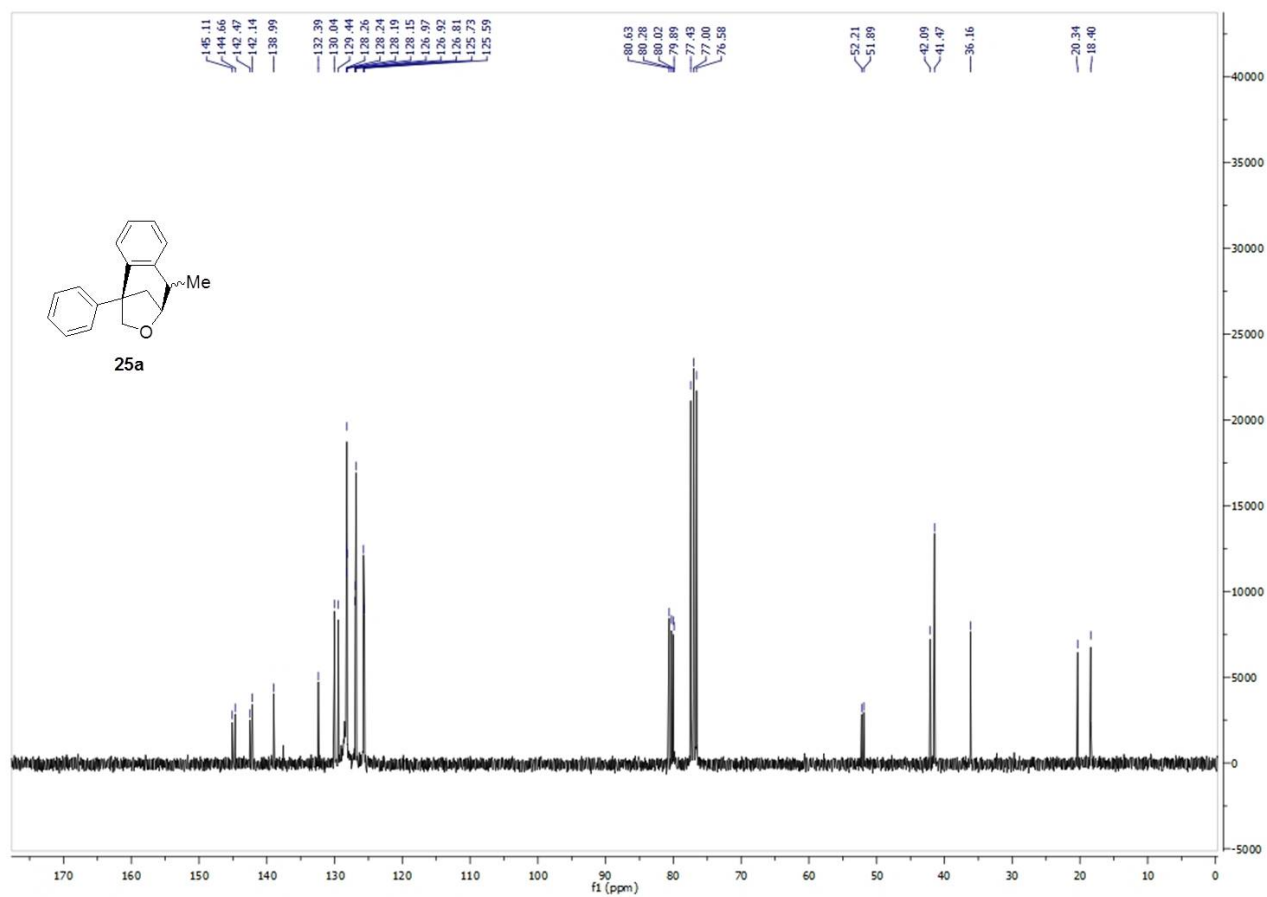

20110804methoxy1Dproduct1a

Sample Name:  
 Data Collected on:  
 chemmr500.chem.buffalo.edu-inova500  
 Archive directory:  
 Sample directory:  
 FidFile: PROTON

Pulse Sequence: PROTON (s2pu1)  
 Solvent: cdcl3  
 Data collected on: Aug 4 2011

Operator: Chemler  
 Relax. delay 1.000 sec  
 Pulse 45.0 degrees  
 Acq. time 2.048 sec  
 Width 8000.0 Hz  
 8 repetitions  
 OBSERVE H1, 499.8984083 MHz  
 DATA PROCESSING  
 FT size 32768  
 Total time 0 min 24 sec

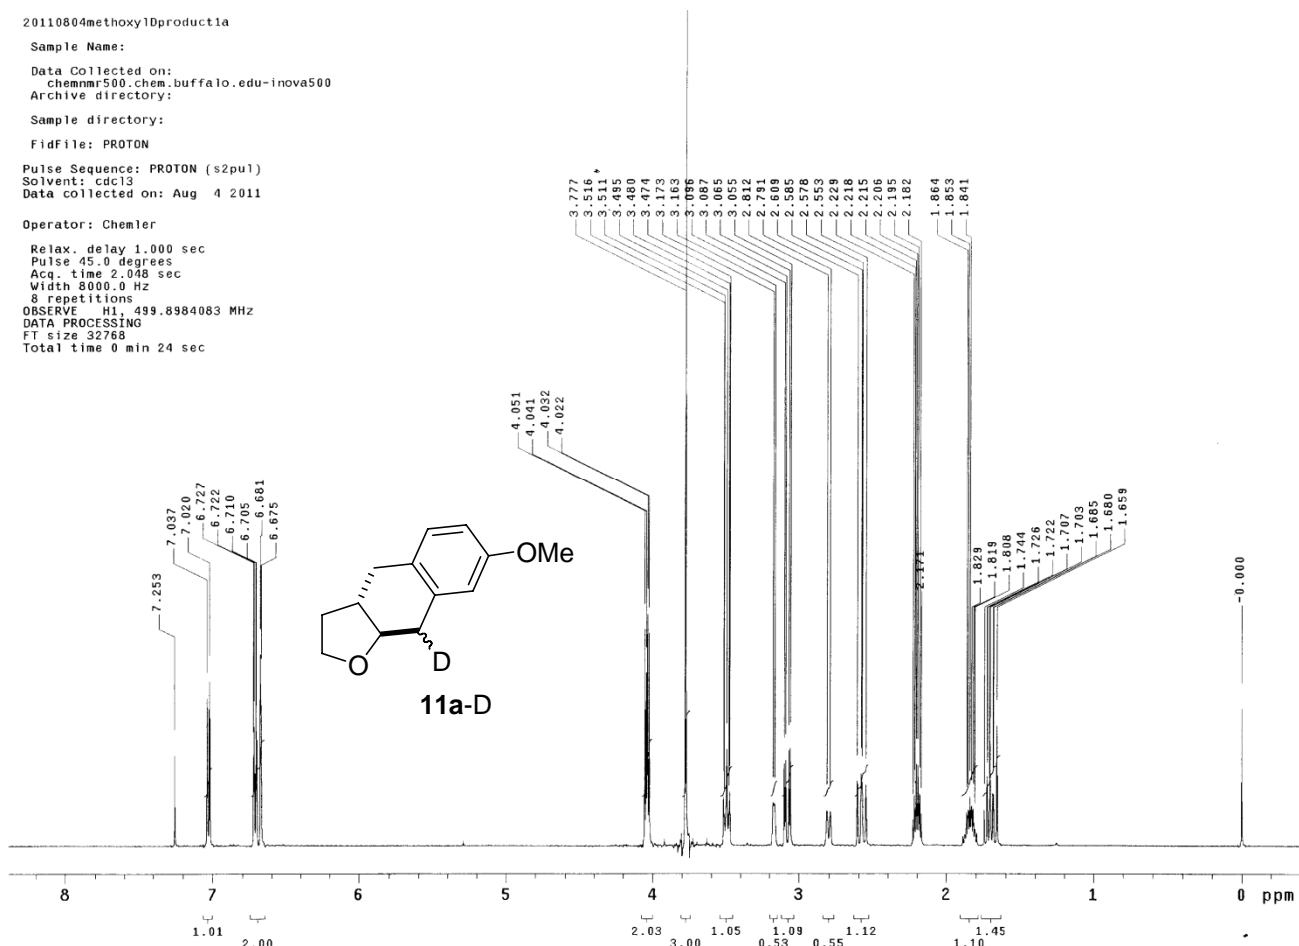

20110804methoxy1Dproduct1aC13

Sample Name:  
 Data Collected on:  
 Poesy.chem.buffalo.edu-mercury300  
 Archive directory:  
 Sample directory:  
 FidFile: CARBON

Pulse Sequence: CARBON (s2pu1)  
 Solvent: cdcl3  
 Data collected on: Aug 4 2011

Temp. 22.0 C / 295.1 K  
 Operator: Chemler

Relax. delay 1.000 sec  
 Pulse 45.0 degrees  
 Acq. time 0.868 sec  
 Width 18867.9 Hz  
 3264 repetitions  
 OBSERVE C13, 75.4536389 MHz  
 DECOUPLE H1, 300.0754430 MHz  
 Power 88 dB  
 continuously on  
 WALTZ-16 modulated  
 DATA PROCESSING  
 Line broadening 0.5 Hz  
 FT size 32768  
 Total time 2 hr, 18 min

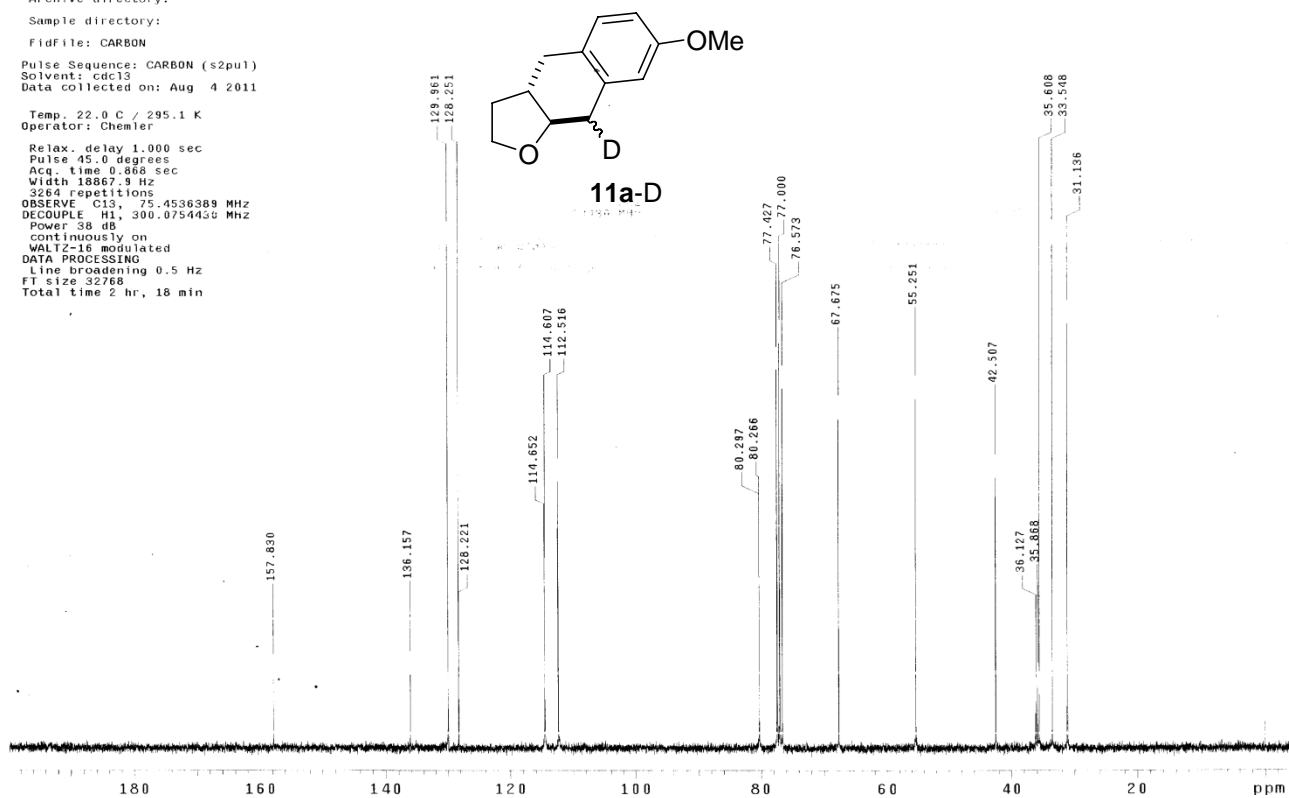

20110808methoxy1Dproduct2bd

Sample Name:  
 Data Collected on:  
 Chemmr500.chem.buffalo.edu-inova500  
 Archive directory:  
 Sample directory:  
 FidFile: PROTON

Pulse Sequence: PROTON (s2pu1)  
 Solvent: cdcl3  
 Data collected on: Aug 8 2011

Operator: Chemler

Relax. delay 1.000 sec  
 Pulse 45.0 degrees  
 Acq. time 2.048 sec  
 Width 8000.0 Hz  
 8 repetitions  
 OBSERVE H1, 499.999 MHz  
 DATA PROCESSING  
 FT size 32768  
 Total time 0 min 24 sec

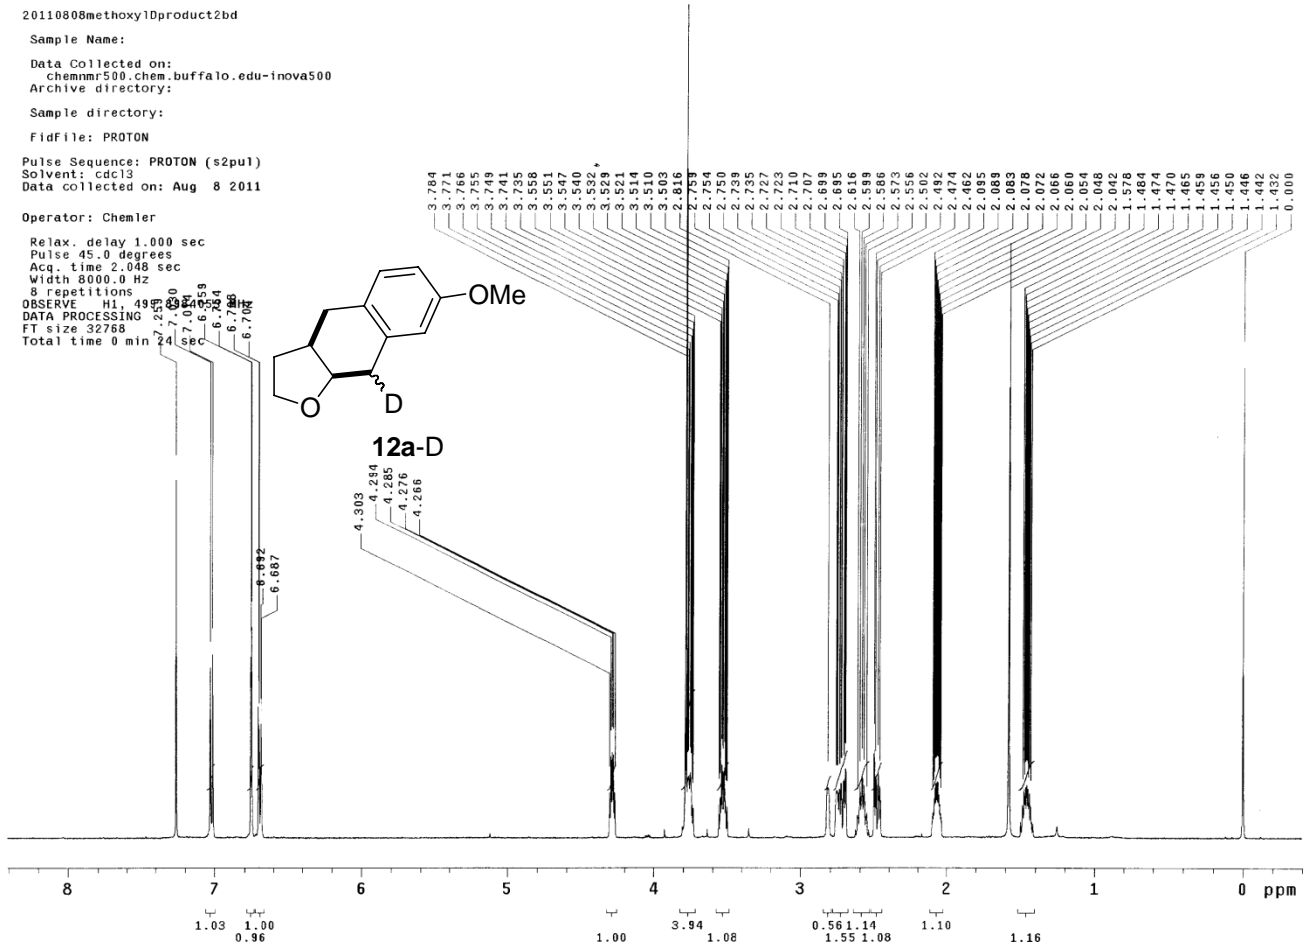

20110808methoxy1Dproduct2bC13

Sample Name:  
 Data Collected on:  
 roesy.chem.buffalo.edu-mercury300  
 Archive directory:  
 Sample directory:  
 FidFile: CARBON

Pulse Sequence: CARBON (s2pu1)  
 Solvent: cdcl3  
 Data collected on: Aug 8 2011

Temp. 22.0 C / 295.1 K  
 Operator: Chemler

Relax. delay 1.000 sec  
 Pulse 45.0 degrees  
 Acq. time 0.868 sec  
 Width 18667.9 Hz  
 23232 repetitions  
 OBSERVE C13, 75.4536377 MHz  
 DECOUPLE H1, 300.0754430 MHz  
 Power 38 dB  
 CONTINUOUSLY on  
 WALTZ-16 modulated  
 DATA PROCESSING  
 Line broadening 0.5 Hz  
 FT size 32768  
 Total time 18 hr, 4 min

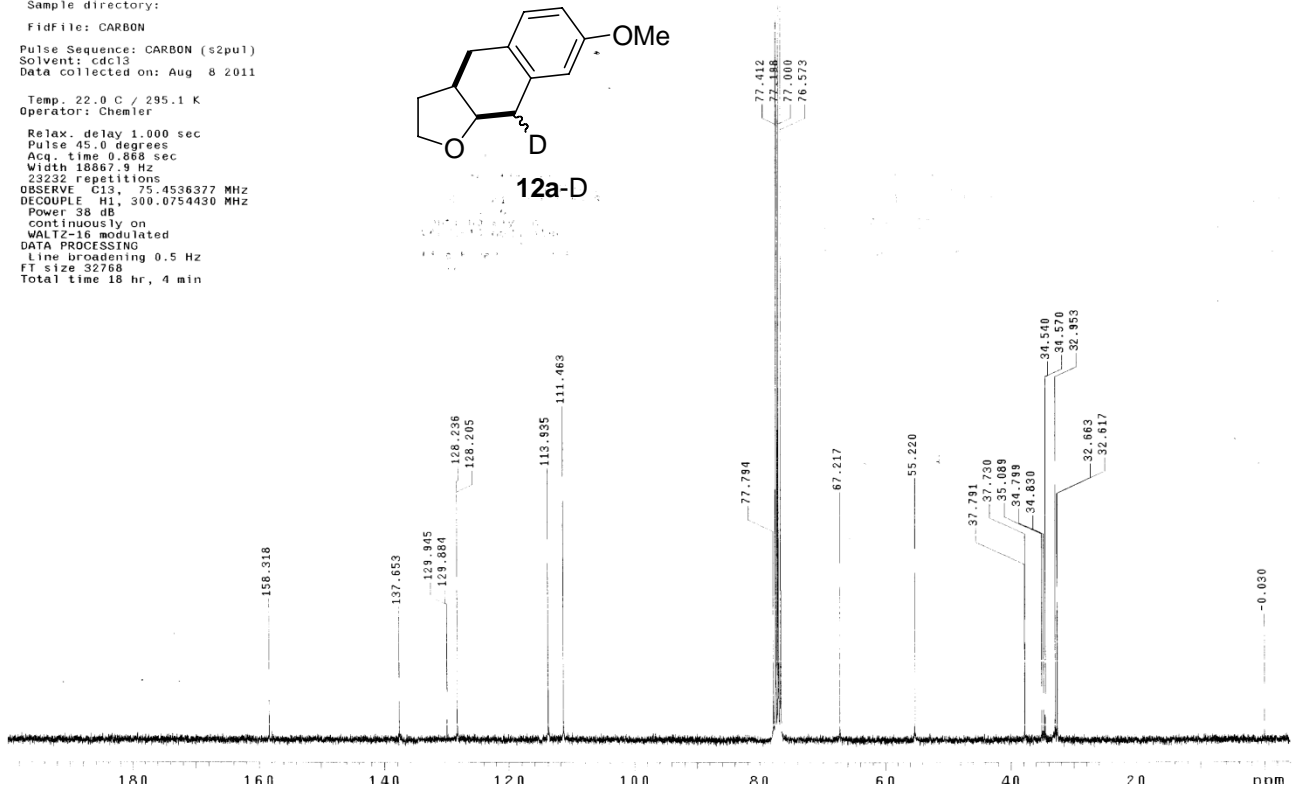

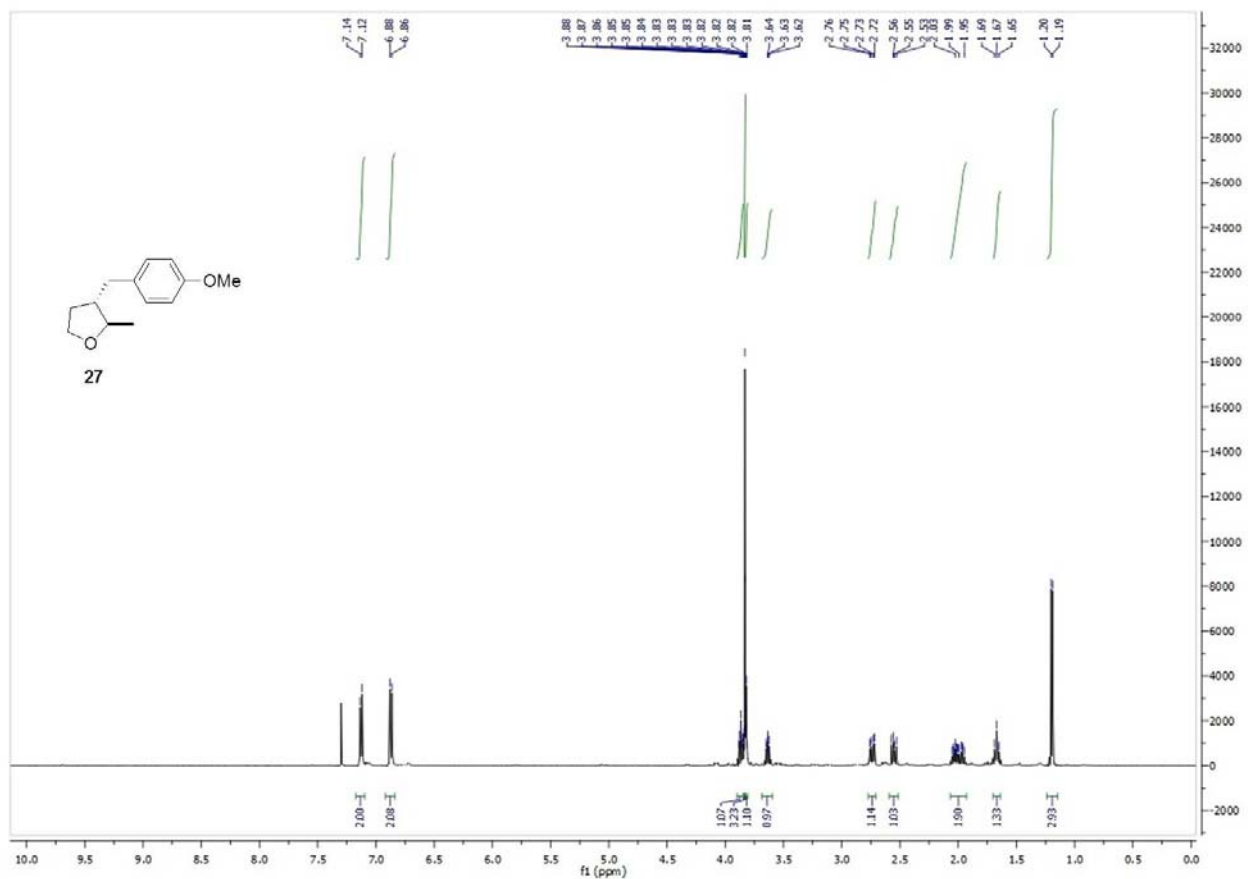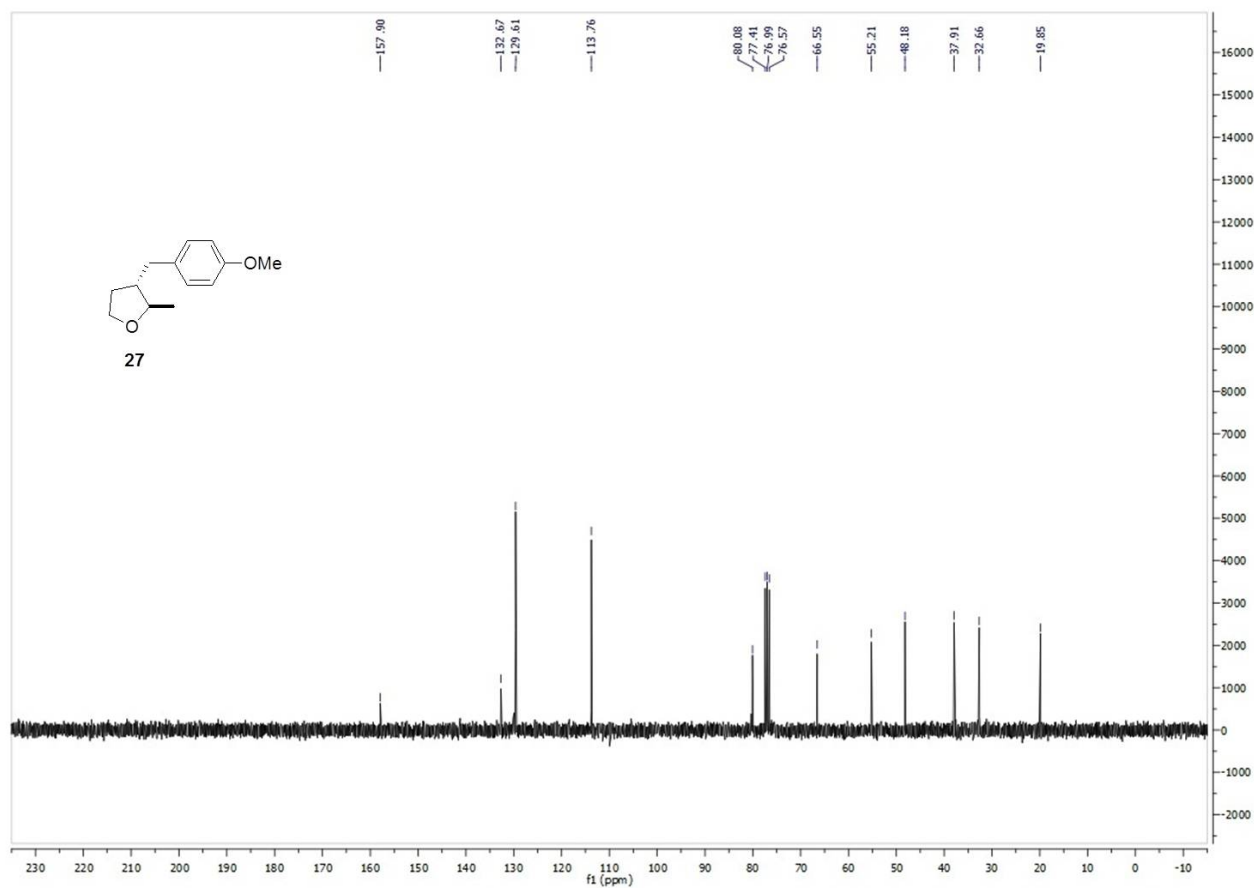

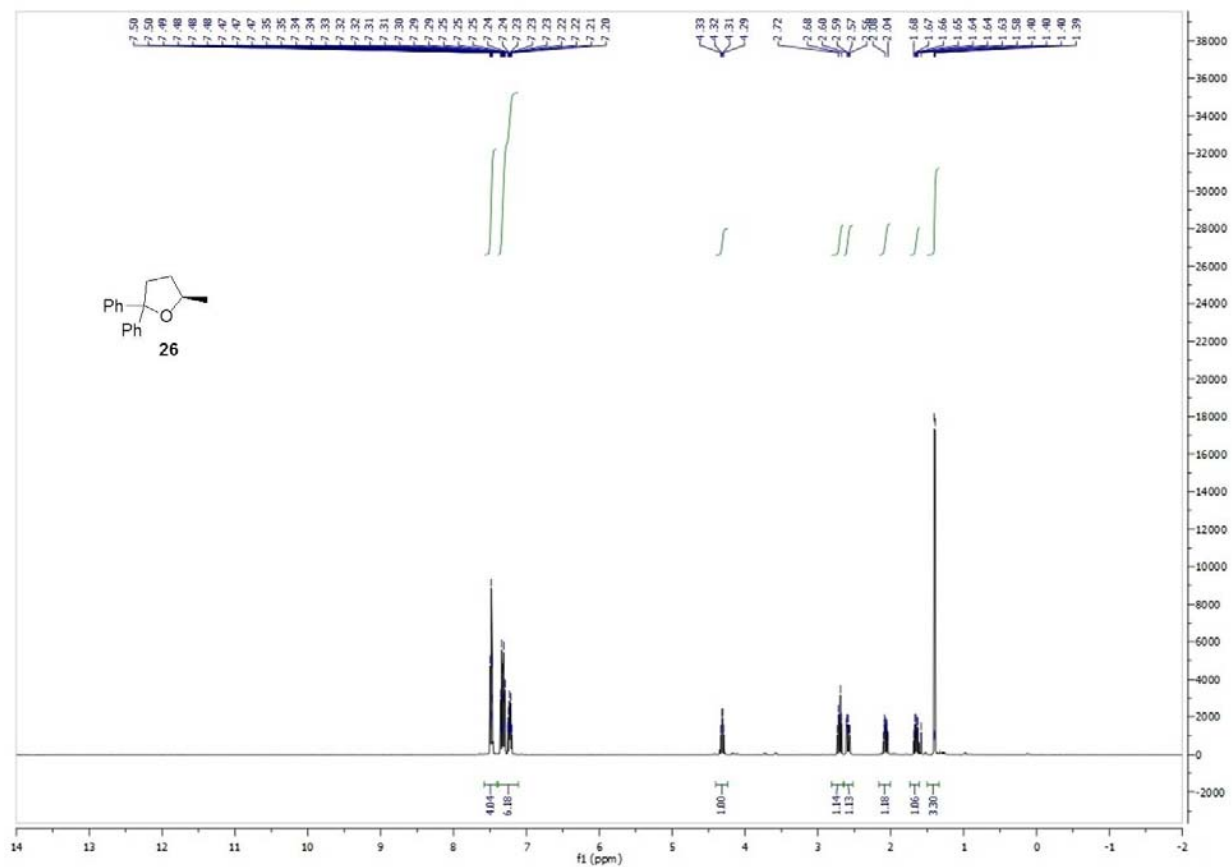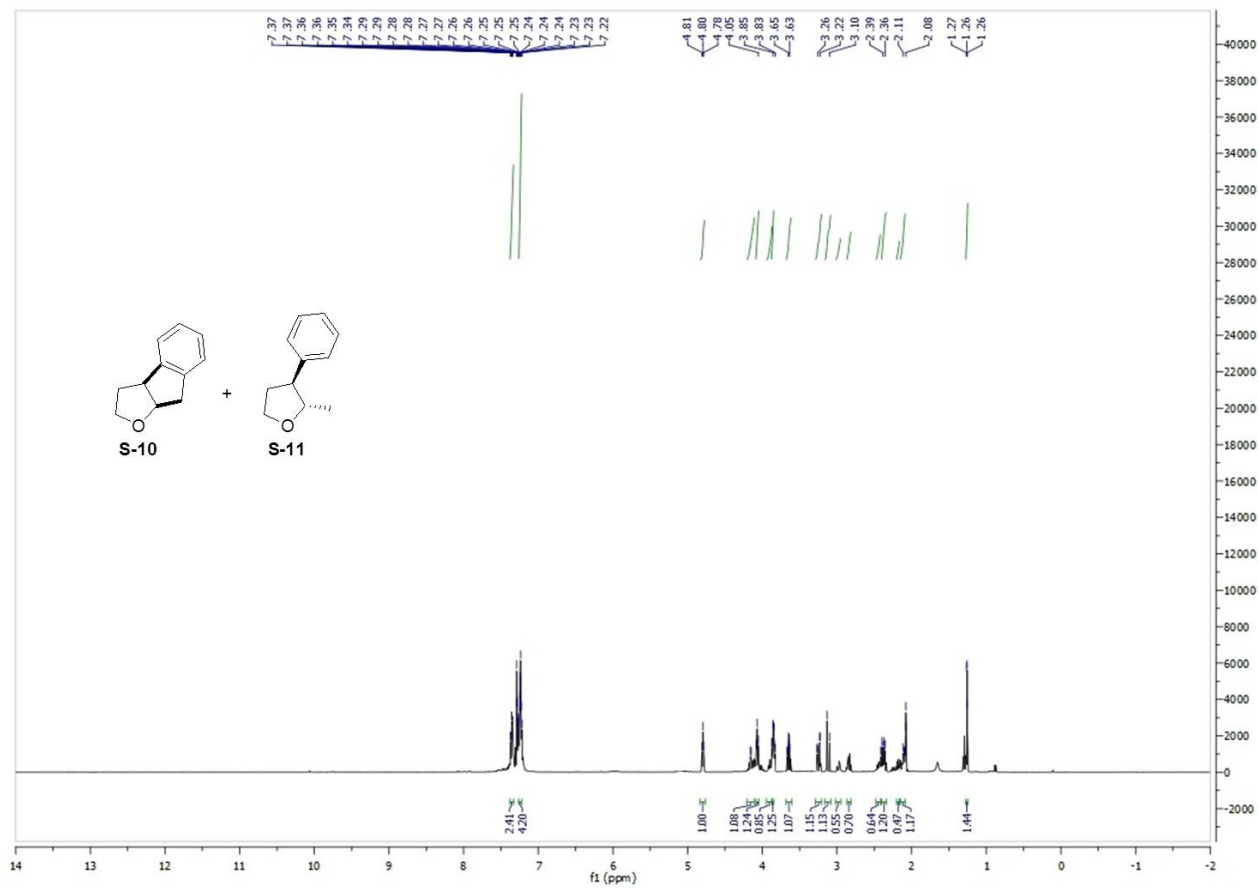

Supplement: NIHMS391705-supplement-3_si_003.pdf [file NIHMS391705-supplement-3_si_003.pdf]
