# Supplementary material
Source: PubMed Central journal article supplement (PMC3430129)
Supplement: NIHMS391705-supplement-4_si_004.pdf [file NIHMS391705-supplement-4_si_004.pdf]

**Copper-Catalyzed Intramolecular Alkene Carboetherification: Synthesis of Fused-Ring and Bridged-Ring Tetrahydrofurans**

Yan Miller, Lei Miao, Azade S. Hosseini and Sherry R. Chemler\*

Department of Chemistry, University at Buffalo,

The State University of New York, Buffalo, New York 14260, schemler@buffalo.edu

**Supporting Information 1**

**Table of Contents**

|                                                                           |         |
|---------------------------------------------------------------------------|---------|
| General Information.....                                                  | S2      |
| Synthesis of substrates.....                                              | S3-S14  |
| General copper-catalyzed carboetherification procedure.....               | S15-S32 |
| Representative procedure for the copper-promoted carboetherification..... | S15     |
| HPLC/GC trace.....                                                        | S34-S39 |
| References.....                                                           | S41     |

**General information:**

All reactions were performed under an argon atmosphere with stirring. Bisoxazoline ligand 4,5-dihydro-2-(2-(4,5-dihydrooxazol-2-yl)propan-2-yl)oxazole **3** was synthesized using our previous reported procedure.<sup>1</sup> (*R, R*)-Ph-Box ligand was purchased from TCI. All other reagents were purchased from Aldrich, Acros or Strem. Solvents were purified using a solvent filtration system. PhCF<sub>3</sub> was purchased from Acros and was used without further purification. <sup>1</sup>H NMR spectra were recorded at 300, 400 or 500 MHz using Varian instruments. <sup>13</sup>C NMR data were recorded at 75 or 125 MHz. Coupling constants (*J*) are in hertz. Abbreviations used are s = singlet, d = doublet, t = triplet, m = multiplet, ABq = AB quartet and br = broad. IR spectra were taken neat using a Nicolet-Impact 420 FTIR. Wave numbers in cm<sup>-1</sup> are reported for characteristic peaks. High resolution mass spectra were obtained at SUNY, Buffalo's mass spec. facility on a ThermoFinnigan MAT XL spectrometer. Melting points were obtained on an electrothermal melting point apparatus and are reported uncorrected. X-ray structures were obtained at the X-ray crystallographic facilities at the University of Rochester. Optical rotations were obtained using a Rudolph Autopol I Polarimeter fitted with a micro cell with a 1 dm path length. Enantiomeric excess was determined by high performance liquid chromatography (HPLC) using Chiralpak AD-RH or Regis (*S, S*)-Whelk chiral analytical column (UV detection at 254nm) or by Chiral GC using a CP-Chirasil-Dex CB column (25m x 25 mm x 0.25 μm) utilizing a Shimadzu 2010 Gas Chromatograph.

## Synthesis of substrates

Substrate **13** was synthesized from reported procedure<sup>2</sup> and the analytical data was consistent with the literature.<sup>3</sup> Substrates **1a**, **1g**, **1h** and **7b** were previously reported.<sup>1</sup> Substrate **10a-c** was synthesized from our previous reported procedure.<sup>1</sup> Substrate **18a**,<sup>4</sup> **20**,<sup>5</sup> **22**,<sup>6</sup> **24a**<sup>6</sup> and **24b**<sup>7</sup> were synthesized from reported procedure and the analytical data was consistent with the literature. Substrates **1b-1f**, **4** and **7a** were synthesized from  $\gamma$ -butyrolactone in 3 steps via our previous reported route:<sup>1</sup>

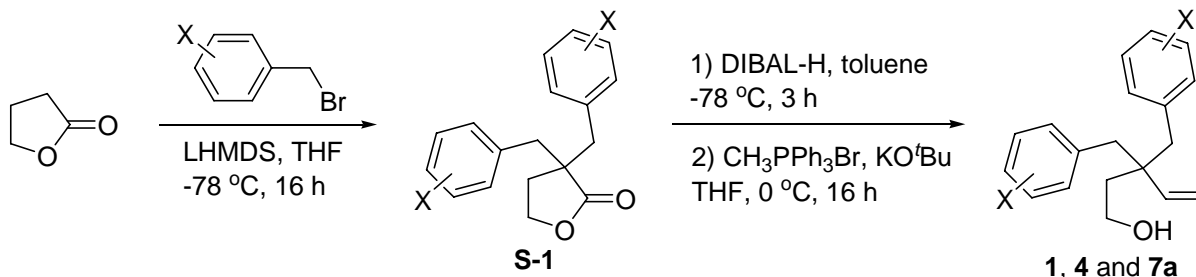

### 3,3-Bis(4-methylbenzyl)dihydrofuran-2(3H)-one (**S-1b**)

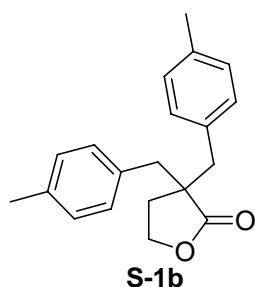

Lactone **S-1b** (1.36 g) was obtained as a white solid (92% yield), mp 169-171 °C; <sup>1</sup>H NMR (500 MHz, CDCl<sub>3</sub>)  $\delta$  7.09 (s, 8H), 3.38 (t,  $J = 7.4$  Hz, 2H), 2.95 (ABq,  $J_{AB} = 13.5$ ,  $\Delta\nu = 202.8$  Hz, 4H), 2.32 (s, 6H), 2.13 (t,  $J = 7.4$  Hz, 2H); <sup>13</sup>C NMR (75 MHz, CDCl<sub>3</sub>)  $\delta$  181.2, 136.6, 133.4, 129.9, 129.2, 65.2, 49.8, 43.3, 29.0, 21.0; IR (neat): 1753, 1512, 1449, 1166, 1029 cm<sup>-1</sup>; HRMS (ESI) calcd for [M+H]<sup>+</sup> C<sub>20</sub>H<sub>23</sub>O<sub>2</sub>: 295.1693, found: 295.1686.

### 3,3-Bis(4-methylbenzyl)pent-4-en-1-ol (**1b**)

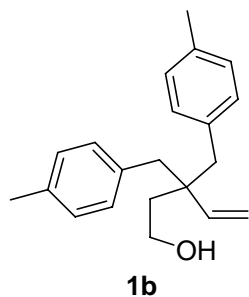

Alcohol **1b** (0.658 g) was obtained as a clear oil (71% yield, 2 steps). <sup>1</sup>H NMR (500 MHz, CDCl<sub>3</sub>)  $\delta$  7.08 – 7.01 (m, 8H), 5.80 (dd,  $J = 11.1, 17.8$  Hz, 1H), 5.09 (d,  $J = 11.1$  Hz, 1H), 4.90 (d,  $J = 17.5$  Hz, 1H), 3.83 – 3.79 (m, 2H), 2.68 (ABq,  $J_{AB} = 13.5$ ,  $\Delta\nu = 23.2$  Hz, 4H), 2.31 (s, 6H), 1.63 – 1.55 (m, 2H), 1.18 (s, 1H); <sup>13</sup>C NMR (75 MHz, CDCl<sub>3</sub>)  $\delta$  145.0, 135.6, 134.6, 130.8, 128.4, 112.9, 59.7, 43.9, 42.9, 36.8, 21.0; IR (neat): 3298, 2928, 1636, 1514, 1452, 1415, 1042, 912, 811 cm<sup>-1</sup>; HRMS (ESI) calcd for [M+H]<sup>+</sup> C<sub>21</sub>H<sub>26</sub>O<sub>2</sub>: 317.1876, found: 317.1873.

### 3,3-Bis(4-methoxybenzyl)-dihydrofuran-2(3H)-one (S-1c)

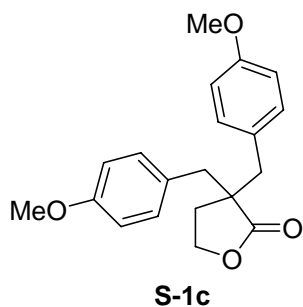

Lactone **S-1c** (0.939 g) was obtained as a white solid (72% yield), mp 149-151 °C; <sup>1</sup>H NMR (500 MHz, CDCl<sub>3</sub>) δ 7.15 (d, *J* = 8.6 Hz, 4H), 6.86 (d, *J* = 8.6 Hz, 4H), 3.81 (s, 6H), 3.43 (t, *J* = 7.4 Hz, 2H), 2.94 (ABq, *J*<sub>AB</sub> = 14.0, Δ*v* = 207.8 Hz, 4H), 2.16 (t, *J* = 7.4 Hz, 2H); <sup>13</sup>C NMR (75 MHz, CDCl<sub>3</sub>) δ 181.2, 158.7, 131.1, 128.5, 113.9, 65.2, 55.2, 50.0, 42.9, 28.9; IR (neat): 1757, 1612, 1513, 1253, 1180, 1166, 1029 cm<sup>-1</sup>; HRMS (ESI) calcd for [M+H]<sup>+</sup> C<sub>20</sub>H<sub>23</sub>O<sub>4</sub>: 327.1591, found: 327.1600.

### 3,3-Bis(4-methoxybenzyl)pent-4-en-1-ol (1c)

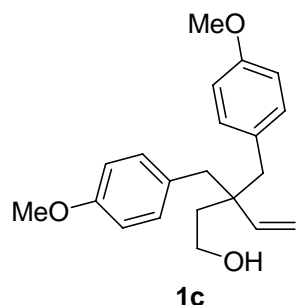

Alcohol **1c** (0.718 g) was obtained as a clear oil (84% yield, 2 steps). <sup>1</sup>H NMR (500 MHz, CDCl<sub>3</sub>) δ 7.08 – 7.03 (m, 4H), 6.82 – 6.78 (m, 4H), 5.79 (dd, *J* = 11.1, 17.8 Hz, 1H), 5.10 (d, *J* = 11.1 Hz, 1H), 4.89 (d, *J* = 17.8 Hz, 1H), 3.84 – 3.77 (m, 8H), 2.65 (ABq, *J*<sub>AB</sub> = 13.0, Δ*v* = 22.7 Hz, 4H), 1.61 – 1.56 (m, 2H), 1.24 (s, 1H); <sup>13</sup>C NMR (75 MHz, CDCl<sub>3</sub>) δ 158.0, 144.9, 131.8, 129.7, 113.1, 113.0, 59.6, 55.1, 43.4, 43.0, 36.7; IR (neat): 3391, 2933, 1611, 1511, 1247, 1178, 1036 cm<sup>-1</sup>; HRMS (ESI) calcd for [M+H]<sup>+</sup> C<sub>21</sub>H<sub>27</sub>O<sub>3</sub>: 327.1955, found: 327.1951.

### 3,3-Bis(4-(methylthio)benzyl)-dihydrofuran-2(3H)-one (S-1d)

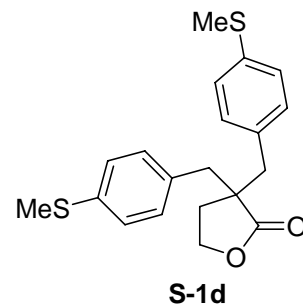

Lactone **S-1d** (2.87 g) was obtained as a white solid (99% yield), mp 156-158 °C; <sup>1</sup>H NMR (500 MHz, CDCl<sub>3</sub>) δ 7.18 (d, *J* = 8.2 Hz, 4H), 7.12 (d, *J* = 8.3 Hz, 4H), 3.43 (t, *J* = 7.4 Hz, 2H), 2.92 (ABq, *J*<sub>AB</sub> = 13.5, Δ*v* = 203.8 Hz, 4H), 2.46 (s, 6H), 2.12 (t, *J* = 7.4 Hz, 2H); <sup>13</sup>C NMR (75 MHz, CDCl<sub>3</sub>) δ 180.8, 137.2, 133.0, 130.4, 126.5, 65.2, 49.73, 43.1, 28.9, 15.6; IR (neat): 1756, 1493, 1169, 1026, 819 cm<sup>-1</sup>; HRMS (ESI) calcd for [M+H]<sup>+</sup> C<sub>20</sub>H<sub>23</sub>O<sub>2</sub>S<sub>2</sub>: 359.1134, found: 359.1130.

### 3,3-Bis(4-(methylthio)benzyl)pent-4-en-1-ol (1d)

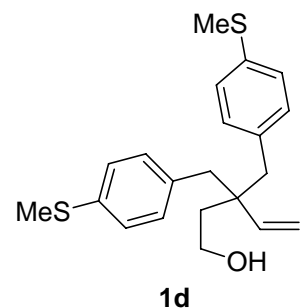

Alcohol **1d** (2.72 g) was obtained as a clear oil (77% yield, 2 steps). <sup>1</sup>H NMR (500 MHz, CDCl<sub>3</sub>) δ 7.18 – 7.13 (m, 4H), 7.08 – 7.04 (m, 4H), 5.77 (dd, *J* = 11.1, 17.8 Hz, 1H), 5.11 (d, *J* = 11.1 Hz, 1H), 4.90 (d, *J* = 17.8 Hz, 1H), 3.80 (t, *J* = 7.0 Hz, 2H), 2.67 (ABq, *J*<sub>AB</sub> = 13.5, Δ*v* = 21.8 Hz, 4H), 2.47 (s, 6H), 1.61 – 1.56 (m, 2H), 1.23 (s, 1H); <sup>13</sup>C NMR (75 MHz, CDCl<sub>3</sub>) δ 144.5, 135.8, 134.5, 131.3, 126.1, 113.3, 59.5, 43.8, 43.0, 36.7, 15.9; IR (neat): 3366, 2920, 1635, 1598, 1494, 1438, 1405, 1095, 1016, 915, 805, 735 cm<sup>-1</sup>; HRMS (EI) calcd for [M]<sup>+</sup> C<sub>21</sub>H<sub>26</sub>OS<sub>2</sub>: 358.1420, found: 358.1415.

### 3,3-Bis(4-bromobenzyl)-dihydrofuran-2(3H)-one (S-1e)

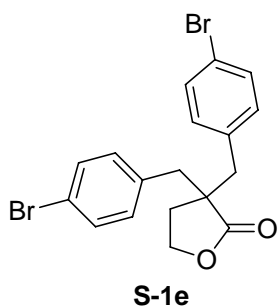

Lactone **S-1e** (3.35 g) was obtained as a white solid (98% yield), mp 157-159 °C;  $^1\text{H}$  NMR (500 MHz,  $\text{CDCl}_3$ )  $\delta$  7.46 – 7.40 (m, 4H), 7.11 – 7.05 (m, 4H), 3.46 (t,  $J = 7.4$  Hz, 2H), 2.93 (ABq,  $J_{\text{AB}} = 14.0$ ,  $\Delta\nu = 204.3$  Hz, 4H), 2.11 (t,  $J = 7.4$ , 2H);  $^{13}\text{C}$  NMR (75 MHz,  $\text{CDCl}_3$ )  $\delta$  180.4, 135.1, 131.7, 121.4, 65.2, 49.5, 43.0, 28.8; IR (neat): 1756, 1486, 1164, 1071, 1028, 1011  $\text{cm}^{-1}$ ; HRMS (ESI) calcd for  $[\text{M}+\text{Na}]^+$   $\text{C}_{18}\text{H}_{16}\text{Br}_2\text{O}_2\text{Na}$ : 444.9409, found: 444.9417.

### 3,3-Bis(4-bromobenzyl)pent-4-en-1-ol (1e)

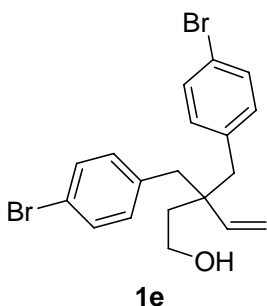

Alcohol **1e** (2.84 g) was obtained as a clear oil (89% yield, 2 steps).  $^1\text{H}$  NMR (500 MHz,  $\text{CDCl}_3$ )  $\delta$  7.41 – 7.36 (m, 4H), 7.04 – 6.98 (m, 4H), 5.73 (dd,  $J = 11.1$ , 17.7 Hz, 1H), 5.13 (d,  $J = 11.1$  Hz, 1H), 4.89 (d,  $J = 17.8$  Hz, 1H), 3.81 (t,  $J = 5.9$  Hz, 2H), 2.66 (ABq,  $J_{\text{AB}} = 14.0$ ,  $\Delta\nu = 19.5$  Hz, 4H), 1.60 – 1.54 (m, 2H), 1.26 (s, 1H);  $^{13}\text{C}$  NMR (75 MHz,  $\text{CDCl}_3$ )  $\delta$  143.9, 136.5, 132.5, 130.9, 120.3, 113.8, 59.3, 43.7, 42.9, 36.5; IR (neat): 3333, 2936, 1487, 1405, 1073, 1011, 916, 840, 802, 728  $\text{cm}^{-1}$ ; HRMS (EI) calcd for  $[\text{M}]^+$   $\text{C}_{19}\text{H}_{20}\text{Br}_2\text{O}$ : 421.9875, found: 421.9861.

### 3,3-Bis(4-chlorobenzyl)-dihydrofuran-2(3H)-one (S-1f)

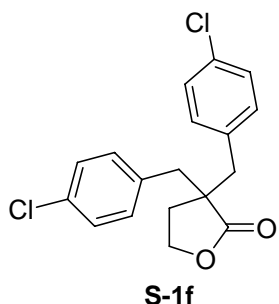

Lactone **S-1f** (2.68 g) was obtained as a white solid (88% yield), mp 151-153 °C;  $^1\text{H}$  NMR (500 MHz,  $\text{CDCl}_3$ )  $\delta$  7.30 – 7.25 (m, 4H), 7.17 – 7.11 (m, 4H), 3.46 (t,  $J = 7.4$  Hz, 2H), 2.94 (ABq,  $J_{\text{AB}} = 14.0$ ,  $\Delta\nu = 205.5$  Hz, 4H), 2.12 (t,  $J = 7.4$  Hz, 2H);  $^{13}\text{C}$  NMR (75 MHz,  $\text{CDCl}_3$ )  $\delta$  180.4, 134.6, 133.3, 131.4, 128.8, 65.2, 49.6, 42.9, 28.8; IR (neat): 1755, 1491, 1166, 1099, 1027, 822  $\text{cm}^{-1}$ ; HRMS (ESI) calcd for  $[\text{M}+\text{Na}]^+$   $\text{C}_{18}\text{H}_{16}\text{Cl}_2\text{O}_2\text{Na}$ : 357.0420, found: 357.0418.

### 3,3-Bis(4-chlorobenzyl)pent-4-en-1-ol (1f)

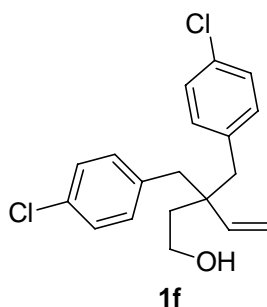

Alcohol **1f** (1.86 g) was obtained as a clear oil (87% yield, 2 steps).  $^1\text{H}$  NMR (500 MHz,  $\text{CDCl}_3$ )  $\delta$  7.25 – 7.21 (m, 4H), 7.09 – 7.04 (m, 4H), 5.73 (dd,  $J = 11.1$ , 17.8 Hz, 1H), 5.13 (d,  $J = 11.1$  Hz, 1H), 4.89 (d,  $J = 18.0$  Hz, 1H), 3.81 (t,  $J = 7.2$  Hz, 2H), 2.68 (ABq,  $J_{\text{AB}} = 13.0$ ,  $\Delta\nu = 19.8$  Hz, 4H), 1.59 – 1.54 (m, 2H), 1.26 (s, 1H);  $^{13}\text{C}$  NMR (75 MHz,  $\text{CDCl}_3$ )  $\delta$  143.9, 135.9, 132.1, 132.1, 128.0, 113.8, 59.3, 43.7, 42.9, 36.5; IR (neat): 3335, 2936, 1490, 1408, 1092, 1014, 917, 842, 806, 731  $\text{cm}^{-1}$ ; HRMS (EI) calcd for  $[\text{M}]^+$   $\text{C}_{19}\text{H}_{20}\text{Cl}_2\text{O}$ : 334.0886, found: 334.0889.

### 3,3-Bis(3-methoxybenzyl)-dihydrofuran-2(3H)-one (S-1i)

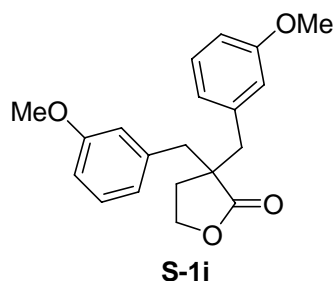

Lactone **S-1i** (2.61 g) was obtained as a colorless oil (93% yield).  $^1\text{H}$  NMR (500 MHz,  $\text{CDCl}_3$ )  $\delta$  7.21 (t,  $J = 7.9$  Hz, 2H), 6.85 – 6.73 (m, 6H), 3.79 (s, 6H), 3.42 (t,  $J = 7.4$  Hz, 2H), 2.96 (ABq,  $J_{\text{AB}} = 14.0$ ,  $\Delta\nu = 206.6$  Hz, 4H), 2.16 (t,  $J = 7.4$ , 2H);  $^{13}\text{C}$  NMR (75 MHz,  $\text{CDCl}_3$ )  $\delta$  181.1, 159.6, 138.0, 129.5, 122.4, 115.6, 112.5, 65.3, 55.14, 49.7, 43.8, 29.1; IR (neat): 2918, 2836, 1762, 1601, 1583, 1489, 1264, 1158, 1031, 787, 699  $\text{cm}^{-1}$ ; HRMS (ESI) calcd for  $[\text{M}+\text{H}]^+$   $\text{C}_{20}\text{H}_{23}\text{O}_4$ : 327.1591, found: 327.1588.

### 3,3-Bis(3-methoxybenzyl)pent-4-en-1-ol (4)

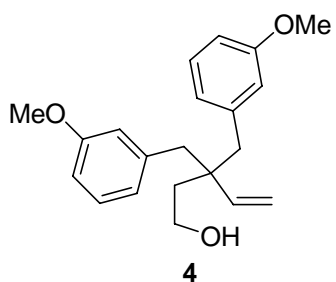

Alcohol **4** (1.71 g) was obtained as a clear oil (88% yield, 2 steps).  $^1\text{H}$  NMR (500 MHz,  $\text{CDCl}_3$ )  $\delta$  7.17 (t,  $J = 7.9$  Hz, 2H), 6.79 – 6.68 (m, 6H), 5.83 (dd,  $J = 11.1, 17.8$  Hz, 1H), 5.12 (d,  $J = 11.1$  Hz, 1H), 4.92 (d,  $J = 17.8$  Hz, 1H), 3.85 – 3.74 (m, 8H), 2.71 (ABq,  $J_{\text{AB}} = 14.0$ ,  $\Delta\nu = 22.4$  Hz, 4H), 1.67 – 1.60 (m, 2H), 1.39 (s, 1H);  $^{13}\text{C}$  NMR (75 MHz,  $\text{CDCl}_3$ )  $\delta$  159.0, 144.9, 139.3, 128.6, 123.4, 116.8, 113.0, 111.3, 59.5, 55.0, 44.4, 42.9, 37.0; IR (neat): 3394, 2942, 1601, 1583, 1489, 1263, 1155, 1044  $\text{cm}^{-1}$ ; HRMS (ESI) calcd for  $[\text{M}+\text{H}]^+$   $\text{C}_{21}\text{H}_{27}\text{O}_3$ : 327.1955, found: 327.1946.

### 3,3-Bis(2-methoxybenzyl)-dihydrofuran-2(3H)-one (S-1j)

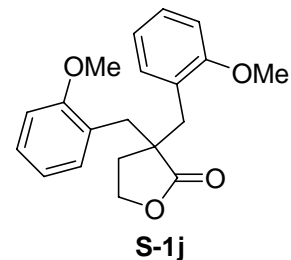

Lactone **S-1j** (2.58 g) was obtained as a colorless oil (99% yield).  $^1\text{H}$  NMR (500 MHz,  $\text{CDCl}_3$ )  $\delta$  7.25 – 7.19 (m, 4H), 6.88 (m,  $J = 4.7$ , 4H), 3.79 (s, 6H), 3.55 (t,  $J = 7.2$  Hz, 2H), 3.08 (ABq,  $J_{\text{AB}} = 13.0$ ,  $\Delta\nu = 75.1$  Hz, 4H), 2.08 (t,  $J = 7.2$  Hz, 2H);  $^{13}\text{C}$  NMR (75 MHz,  $\text{CDCl}_3$ )  $\delta$  181.4, 157.9, 131.9, 128.2, 125.5, 120.6, 110.3, 65.6, 55.1, 49.5, 36.4, 29.4; IR (neat): 2361, 2342, 1762, 1494, 1245, 1027, 755  $\text{cm}^{-1}$ ; HRMS (ESI) calcd for  $[\text{M}+\text{H}]^+$   $\text{C}_{20}\text{H}_{23}\text{O}_4$ : 327.1591, found: 327.1590.

### 3,3-Bis(2-methoxybenzyl)pent-4-en-1-ol (7a)

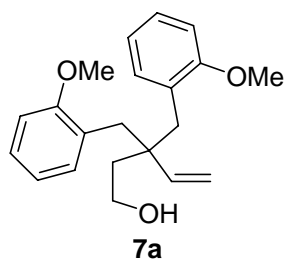

Alcohol **7a** (1.80 g) was obtained as a clear oil (80% yield, 2 steps).  $^1\text{H}$  NMR (500 MHz,  $\text{CDCl}_3$ )  $\delta$  7.21 – 7.16 (m, 2H), 7.11 (dd,  $J = 1.7, 7.8$  Hz, 2H), 6.88 – 6.81 (m, 4H), 5.82 (dd,  $J = 11.5, 17.5$  Hz, 1H), 4.98 (dd,  $J = 11.1$  Hz, 1H), 4.84 (dd,  $J = 17.8$  Hz, 1H), 3.88 – 3.73 (m, 8H), 2.82 (ABq,  $J_{\text{AB}} = 13.0$ ,  $\Delta\nu = 11.0$  Hz, 4H), 1.63 (t,  $J = 7.0$  Hz, 2H), 1.35 (s, 1H);  $^{13}\text{C}$  NMR (75 MHz,  $\text{CDCl}_3$ )  $\delta$  158.0, 145.4, 132.7, 127.3, 126.8, 119.8, 111.39, 110.4, 60.1, 55.1, 44.0, 37.0, 36.8; IR (neat): 3367, 2936, 1599, 1585, 1494, 1462, 1244, 1031, 911, 753  $\text{cm}^{-1}$ ; HRMS (ESI) calcd for  $[\text{M}+\text{H}]^+$   $\text{C}_{21}\text{H}_{27}\text{O}_3$ : 327.1955, found: 327.1954.

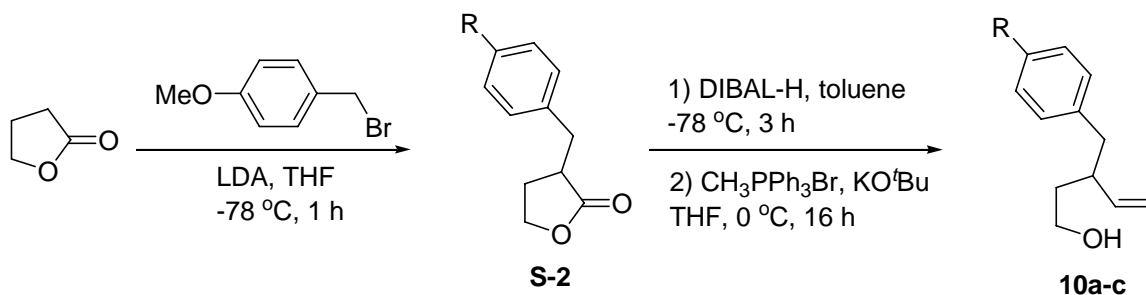

### 3-(4-Methoxybenzyl)-dihydrofuran-2(3H)-one (S-2a)<sup>1</sup>

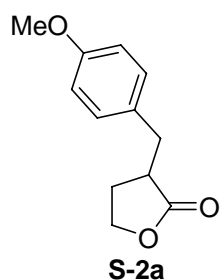

Lactone **S-2a** (4.13 g) was obtained as a colorless oil (83% yield, 2 steps). <sup>1</sup>H NMR (500 MHz, CDCl<sub>3</sub>) δ 7.15 – 7.10 (m, 2H), 6.87 – 6.82 (m, 2H), 4.23 – 4.11 (m, 2H), 3.79 (s, 3H), 3.17 (dd, *J* = 4.1, 13.8 Hz, 1H), 2.85 – 2.70 (m, 2H), 2.28 – 2.20 (m, 1H), 2.04 – 1.94 (m, 1H); <sup>13</sup>C NMR (75 MHz, CDCl<sub>3</sub>) δ 178.8, 158.4, 130.3, 129.9, 114.0, 66.5, 55.2, 41.2, 35.1, 27.8; IR (neat): 2914, 2360, 1767, 1612, 1513, 1248, 1150, 1024, 811 cm<sup>-1</sup>; HRMS (EI) calcd for [M]<sup>+</sup> C<sub>12</sub>H<sub>14</sub>O<sub>3</sub>: 206.0937, found: 206.0933.

### 3-(4-Methoxybenzyl)pent-4-en-1-ol (10a)

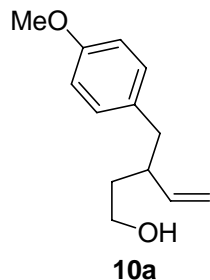

Alcohol **10a** (2.11 g) was obtained as a clear oil (91% yield, 2 steps). <sup>1</sup>H NMR (500 MHz, CDCl<sub>3</sub>) δ 7.08 – 7.03 (m, 2H), 6.84 – 6.79 (m, 2H), 5.68 – 5.60 (m, 1H), 5.00 – 4.92 (m, 2H), 3.78 (s, 3H), 3.71 – 3.56 (m, 2H), 2.60 (d, *J* = 7.2 Hz, 2H), 2.47 – 2.38 (m, 1H), 1.74 – 1.67 (m, 1H), 1.54 – 1.45 (m, 1H), 1.29 (t, *J* = 5.3 Hz, 1H); <sup>13</sup>C NMR (75 MHz, CDCl<sub>3</sub>) δ 157.8, 142.0, 132.1, 130.1, 115.2, 113.5, 61.2, 55.2, 42.9, 41.1, 36.8; IR (neat): 3361, 2931, 2360, 1613, 1512, 1246, 1178, 1037 cm<sup>-1</sup>; HRMS (EI) calcd for [M]<sup>+</sup> C<sub>13</sub>H<sub>18</sub>O<sub>2</sub>: 206.1301, found: 206.1299.

### 3-(4-(Methylthio)benzyl)pent-4-en-1-ol (10b)

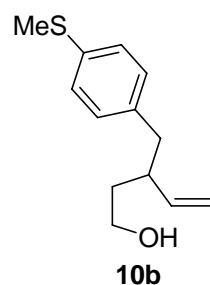

Alcohol **10b** (1.65 g) was obtained as a clear oil (81% yield, 3 steps). <sup>1</sup>H NMR (300 MHz, CDCl<sub>3</sub>) δ 7.20-7.14 (m, 2H), 7.07 (d, *J* = 8.2 Hz, 2H), 5.68 – 5.56 (m, 1H), 5.00 – 4.90 (m, 2H), 3.66 – 3.54 (m, 2H), 2.62 (d, *J* = 7.6 Hz, 2H), 2.47 (s, 3H), 2.52 – 2.42 (m, 1H), 1.96 (brs, 1H), 1.76 – 1.61 (m, 1H), 1.58 – 1.40 (m, 1H); <sup>13</sup>C NMR (75 MHz, CDCl<sub>3</sub>) δ 141.73, 137.18, 135.37, 129.81, 126.79, 115.33, 60.88, 42.51, 41.37, 36.78, 16.17; IR (neat): 3321, 3077, 2920, 1633, 1493, 1433, 1411, 1043, 990, 914, 800 cm<sup>-1</sup>; HRMS (EI) calcd for [M]<sup>+</sup> C<sub>13</sub>H<sub>18</sub>OS: 222.1073, found: 222.1072.

### 3-(4-(Methyl)benzyl)pent-4-en-1-ol (**10c**)

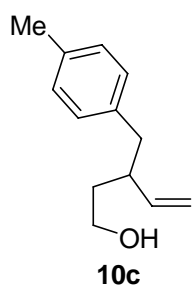

Alcohol **10c** (1.69 g) was obtained as a clear oil (79% yield, 3 steps).  $^1\text{H}$  NMR (300 MHz,  $\text{CDCl}_3$ )  $\delta$  7.20-6.96 (m, 4H), 5.69 – 5.59 (m, 1H), 5.12 – 4.85 (m, 2H), 3.71 – 3.55 (m, 2H), 2.64 (d,  $J = 7.2$  Hz, 2H), 2.53 – 2.40 (m, 1H), 2.34 (s, 3H), 1.82-1.75 (brs, 1H), 1.76 – 1.66 (m, 1H), 1.57 – 1.45 (m, 1H);  $^{13}\text{C}$  NMR (75 MHz,  $\text{CDCl}_3$ )  $\delta$  142.08, 136.97, 135.30, 129.17, 128.84, 115.09, 61.06, 42.65, 41.53, 36.81, 21.02; IR (neat): 3314, 2919, 2859, 1637, 1514, 1443, 1415, 1041, 990, 911, 804  $\text{cm}^{-1}$ ; HRMS (EI) calcd for  $[\text{M}]^+$   $\text{C}_{13}\text{H}_{18}\text{O}$ : 190.1352, found: 190.1355.

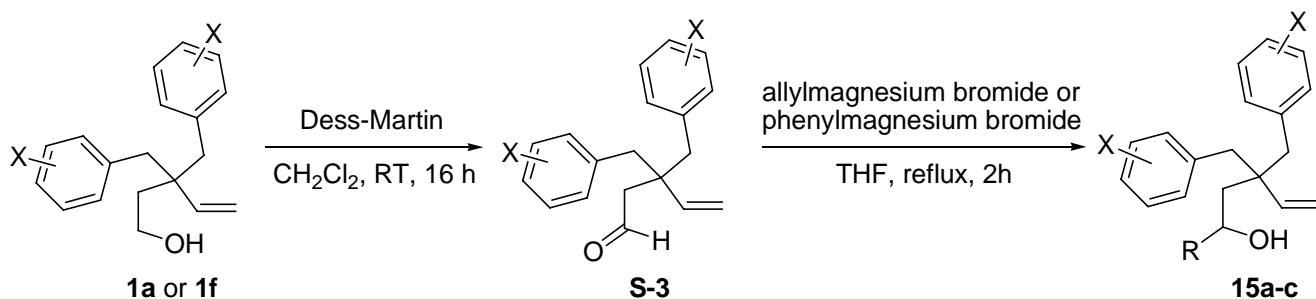

### 3,3-Dibenzyl-1-phenylpent-4-en-1-ol (**15a**)

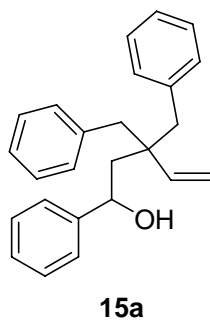

Dess-Martin periodinane (1.44 g, 3.38 mmol, 1.5 equiv) was dissolved in  $\text{CH}_2\text{Cl}_2$  (40 mL) at 0  $^\circ\text{C}$ .<sup>8</sup> A solution of alcohol **1a** (600 mg, 2.25 mmol, 1.0 equiv) in  $\text{CH}_2\text{Cl}_2$  (20 mL) was added dropwise to the mixture and the reaction was allowed to warm to room temperature and stirred for 16 hours. The reaction mixture was then diluted with  $\text{Et}_2\text{O}$  (80 mL) and washed with saturated  $\text{Na}_2\text{S}_2\text{O}_3$  (40 mL), saturated  $\text{Na}_2\text{S}_2\text{O}_3$ /saturated  $\text{NaHCO}_3$  (40 mL, 1:1) and brine (40 mL), respectively. The organic layers were dried over anhydrous  $\text{Na}_2\text{SO}_4$ , filtered and concentrated *in vacuo* to afford the crude aldehyde **S-3a**.

The crude aldehyde **S-3a** (486 mg, 1.84 mmol, 1.0 equiv) was dissolved in THF (15 mL) at room temperature followed by adding phenylmagnesium bromide (2.8 M in  $\text{Et}_2\text{O}$ , 1.0 mL, 2.82 mmol, 1.5 equiv) and the resulting mixture was refluxed for 2 hours. The reaction was quenched with 1 N HCl (15 mL) at 0  $^\circ\text{C}$  and extracted with  $\text{Et}_2\text{O}$  (40 + 20 mL). The combined organic layers were dried over anhydrous  $\text{Na}_2\text{SO}_4$ , filtered and concentrated *in vacuo*. The residue was purified by flash column chromatography ( $\text{SiO}_2$ , 90:10 hexanes/ $\text{EtOAc}$ ) to afford 478 mg (76% yield, 2 steps) of **15a** as a colorless oil.  $^1\text{H}$  NMR (500 MHz,  $\text{CDCl}_3$ )  $\delta$  7.35 – 7.16 (m, 15H), 5.98 (dd,  $J = 11.1, 17.8$  Hz, 1H), 5.19 (dd,  $J = 0.8, 11.1$  Hz, 1H), 5.11 – 5.00 (m, 2H), 3.04 – 2.78 (m, 4H), 2.03 (d,  $J = 2.6$  Hz, 1H), 1.94 (dd,  $J = 9.5, 14.9$  Hz, 1H), 1.70 (dd,  $J = 2.4, 14.9$  Hz, 1H);  $^{13}\text{C}$  NMR (75 MHz,  $\text{CDCl}_3$ )  $\delta$  145.7, 145.6, 138.0, 138.0, 131.3, 131.2, 128.5, 127.7, 127.4, 126.1, 125.8, 113.1, 71.9, 44.8, 43.9, 43.6, 43.5; IR (neat):



3562, 3442, 3927, 2920, 2360, 1601, 1494, 1453, 1063, 1030, 914, 754, 701  $\text{cm}^{-1}$ ; HRMS (EI) calcd for  $[\text{M}]^+$   $\text{C}_{25}\text{H}_{26}\text{O}$ : 342.1978, found: 342.1981.

### 6,6-Dibenzyl-octa-1,7-dien-4-ol (**15b**)

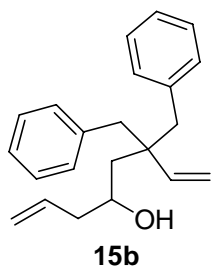

The crude aldehyde **S-3a** was converted to alcohol **15b** using the same procedure as **S-3a** to **15a** except allylmagnesium chloride (1.5 equiv) was the Grignard nucleophile. Alcohol **15b** was obtained 432 mg as a clear oil (69% yield, 2 steps).  $^1\text{H}$  NMR (500 MHz,  $\text{CDCl}_3$ )  $\delta$  7.30 – 7.13 (m, 10H), 5.93 (dd,  $J = 11.1, 17.8$  Hz, 1H), 5.86 – 5.74 (m, 1H), 5.19 – 5.00 (m, 4H), 4.00 (s, 1H), 2.93 – 2.72 (m, 4H), 2.23 – 2.09 (m, 2H), 1.83 (d,  $J = 3.1$  Hz, 1H), 1.62 – 1.54 (m, 1H), 1.48 (dd,  $J = 2.0, 14.8$  Hz, 1H);  $^{13}\text{C}$  NMR (75 MHz,  $\text{CDCl}_3$ )  $\delta$  145.7, 138.0, 137.9, 134.8, 131.2, 131.2, 127.7, 127.7, 126.1, 126.0, 118.1, 112.8, 67.9, 44.7, 43.7, 43.3, 43.2, 41.5; IR (neat): 3572, 3452, 3027, 2933, 1638, 1601, 1494, 1452, 998, 914, 703  $\text{cm}^{-1}$ ; HRMS (EI) calcd for  $[\text{M}]^+$   $\text{C}_{22}\text{H}_{26}\text{O}$ : 306.1978, found: 306.1983.

### 3,3-bis(4-Chlorobenzyl)-1-phenylpent-4-en-1-ol (**15c**)

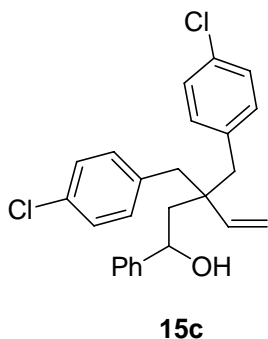

**15c** was obtained in 74% yield over two steps from **1f** as a colorless oil following procedure of **1a** to **15a**.  $^1\text{H}$  NMR (500 MHz,  $\text{CDCl}_3$ )  $\delta$  7.40 – 7.35 (m, 2H), 7.34 – 7.21 (m, 9H), 7.15 – 7.10 (m, 2H), 5.90 (dd,  $J = 11.1, 17.8$  Hz, 1H), 5.23 (dd,  $J = 0.7, 11.1$  Hz, 1H), 5.07 – 5.00 (m, 2H), 3.09 (d,  $J = 13.4$  Hz, 1H), 2.85 (dt,  $J = 13.4, 22.2$  Hz, 3H), 2.00 (d,  $J = 2.6$  Hz, 1H), 1.94 (dd,  $J = 9.6, 14.9$  Hz, 1H), 1.63 (dd,  $J = 2.4, 14.9$  Hz, 1H);  $^{13}\text{C}$  NMR (75 MHz,  $\text{CDCl}_3$ )  $\delta$  145.69, 144.76, 136.46, 136.33, 132.57, 132.52, 132.08, 132.01, 128.64, 127.91, 127.82, 127.64, 125.76, 113.71, 72.04, 43.85, 43.57, 43.55, 42.82; IR (neat): 3433, 3054, 2921, 2845, 1494, 1447, 1400, 1087, 1011, 917, 832, 803, 727, 699  $\text{cm}^{-1}$ ; HRMS (EI) calcd for  $[\text{M}]^+$   $\text{C}_{25}\text{H}_{24}\text{OCl}_2$ : 410.1199, found: 410.1200.

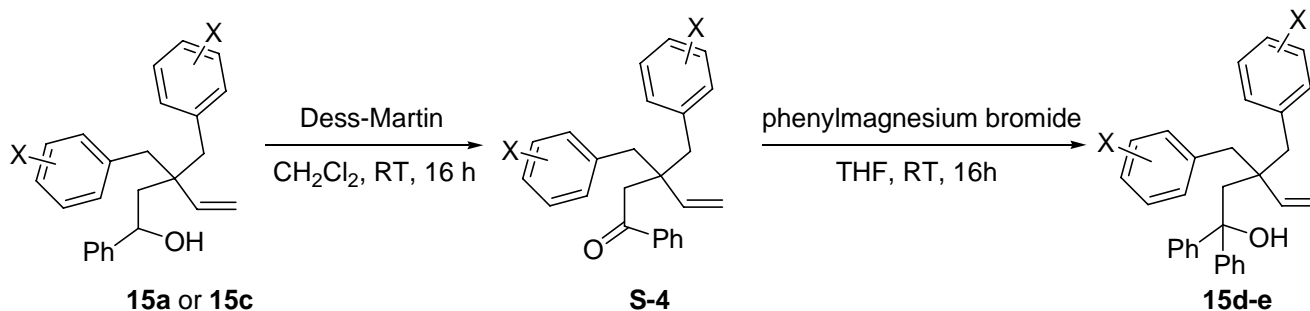

### 3,3-Dibenzyl-1,1-diphenylpent-4-en-1-ol (**15d**)

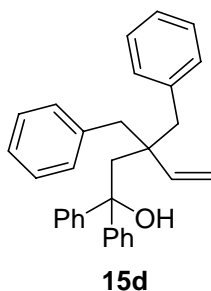

Dess-Martin periodinane (0.478 g, 1.12 mmol, 1.5 equiv) was dissolved in  $\text{CH}_2\text{Cl}_2$  (16 mL) at 0 °C.<sup>8</sup> A solution of alcohol **15a** (256 mg, 0.748 mmol, 1.0 equiv) in  $\text{CH}_2\text{Cl}_2$  (8 mL) was added dropwise to the mixture and the reaction was allowed to warm to room temperature and stirred for 16 hours. The reaction mixture was then diluted with  $\text{Et}_2\text{O}$  (40 mL) and washed with saturated  $\text{Na}_2\text{S}_2\text{O}_3$  (20 mL), saturated  $\text{Na}_2\text{S}_2\text{O}_3$ /saturated  $\text{NaHCO}_3$  (20 mL, 1:1) and brine (20 mL), respectively. The organic layers were dried over anhydrous  $\text{Na}_2\text{SO}_4$ , filtered and concentrated *in vacuo* to afford the crude aldehyde **S-4a**.

The crude ketone **S-4a** (200 mg, 0.588 mmol, 1.0 equiv) was dissolved in THF (4.5 mL) at room temperature followed by addition of phenylmagnesium bromide (2.8 M in  $\text{Et}_2\text{O}$ , 1.05 mL, 2.94 mmol, 5.0 equiv) and the resulting mixture was stirred at room temperature for 12 hours. The reaction was quenched with  $\text{H}_2\text{O}$  (10 mL) at 0 °C and extracted with  $\text{EtOAc}$  (20 mL x 3). The combined organic layers were dried over anhydrous  $\text{Na}_2\text{SO}_4$ , filtered and concentrated *in vacuo*. The residue was purified by flash column chromatography ( $\text{SiO}_2$ , 90:10 hexanes/ $\text{EtOAc}$ ) to afford 200 mg (64% yield, 2 steps) of **15d** as a pale yellow oil.  $^1\text{H}$  NMR (500 MHz,  $\text{CDCl}_3$ )  $\delta$  7.38 – 7.01 (m, 20H), 5.86 (dd,  $J$  = 11.1, 17.8 Hz, 1H), 5.12 (d,  $J$  = 17.8 Hz, 1H), 5.01 (d,  $J$  = 11.2 Hz, 1H), 2.97-2.89 (m, 2H), 2.87-2.81 (m, 2H), 2.65 (s, 2H);  $^{13}\text{C}$  NMR (75 MHz,  $\text{CDCl}_3$ )  $\delta$  169.31, 149.15, 146.45, 146.36, 138.13, 131.68, 128.03, 127.89, 126.26, 125.33, 125.22, 112.54, 78.31, 45.75, 45.69, 43.81, 42.88; IR (neat): 3550, 3050, 3026, 2914, 1600, 1493, 1447, 1063, 1031, 916, 756, 701  $\text{cm}^{-1}$ ; HRMS (ESI) calcd for  $[\text{M} + \text{Na}]^+$   $\text{C}_{31}\text{H}_{30}\text{O}$ : 441.2189, found: 441.2178.

### 3,3-Bis(4-chlorobenzyl)-1,1-diphenylpent-4-en-1-ol (**15e**)

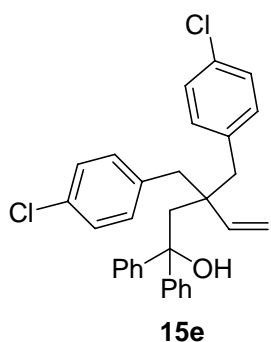

**15e** was obtained in 72% yield over two steps from **15c** as a colorless oil following procedure of **15a** to **15d**.  $^1\text{H}$  NMR (500 MHz,  $\text{CDCl}_3$ )  $\delta$  7.24 (ddd,  $J$  = 21.3, 12.2, 4.6 Hz, 12H), 7.16 – 7.10 (m, 6H), 5.70 (dd,  $J$  = 17.8, 11.1 Hz, 1H), 4.99 (dd,  $J$  = 37.4, 14.5 Hz, 2H), 2.78 (dt,  $J$  = 26.2, 13.3 Hz, 4H), 2.53 (s, 2H);  $^{13}\text{C}$  NMR (75 MHz,  $\text{CDCl}_3$ )  $\delta$  148.78, 145.60, 136.38, 132.77, 132.19, 128.09, 127.92, 126.46, 125.16, 112.85, 78.22, 44.73, 43.73, 42.96; IR (neat): 3565, 2902, 2845, 1490, 1437, 1087, 1002  $\text{cm}^{-1}$ ; HRMS (EI) calcd for  $[\text{M}]^+$   $\text{C}_{31}\text{H}_{28}\text{Cl}_2\text{O}$ : 486.1512, found: 486.1456.

### 2,2-bis(4-Methylthio)phenyl)pent-4-en-1-ol (**18a**)<sup>4</sup>

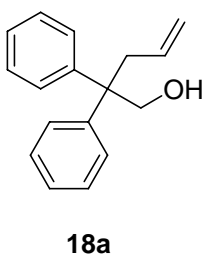

**18a** (0.3 g, 60% yield) was synthesized according to a published procedure and the analytical data was consistent with the literature.  $^1\text{H}$  NMR (300 MHz,  $\text{CDCl}_3$ )  $\delta$  7.39-7.16 (m, 10H), 5.62-5.41 (m, 1H), 5.24-5.01 (m, 2H), 4.17 (s, 2H), 3.07-3.01 (m, 2H), 1.55 (brs, 1H).

### 1,1-Diphenylpent-4-en-1-ol (**20**)<sup>5</sup>

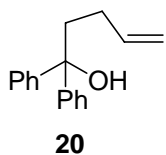

**20** (0.2 g, 50% yield) was synthesized according to a published procedure<sup>5</sup> and the analytical data was consistent with the literature. <sup>1</sup>H NMR (300 MHz, CDCl<sub>3</sub>) δ 7.48-7.44 (m, 4H), 7.38-7.26 (m, 6H), 5.90 (ddt, *J* = 16.9, 10.2, 6.5 Hz, 1H), 5.08 (d, *J* = 17.4 Hz, 1H), 5.00 (d, *J* = 10.0 Hz, 1H), 2.46-2.40 (m, 2H), 2.26 (s, 1H), 2.14-2.07 (m, 2H).

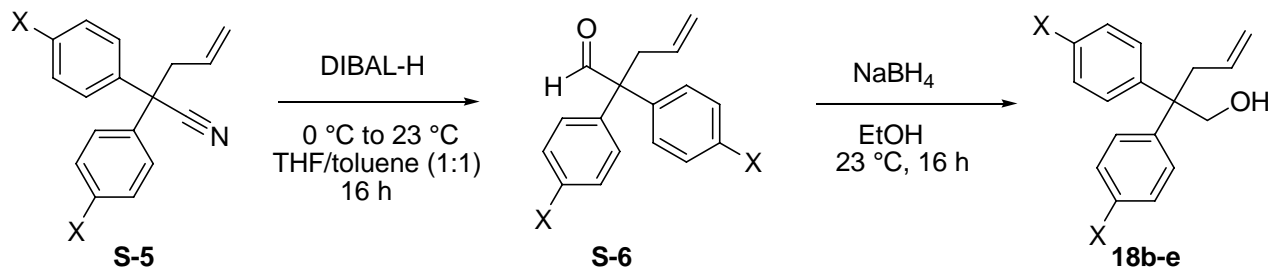

### 2,2-Bis(4-(methylthio)phenyl)pent-4-en-1-ol (**18c**)

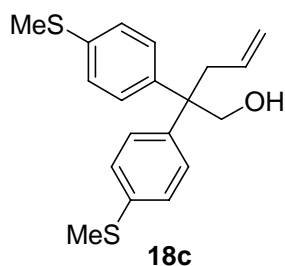

2,2-bis(4(methylthio)phenyl)pent-4-penenitrile **S-5c** (1.0g, 3.51 mmol, 1.00 equiv) was dissolved in a 1:1 mixture of dry THF and toluene (40 mL) in a single-neck round bottom flask equipped with a magnetic stir bar under Ar. The resulting solution was cooled to 0 °C and a solution of DIBAL-H (1.2M, 5.1mL, 2.00equiv) was added dropwise over a period of 10 min and the reaction was left to stir for 16 h at room temperature. 40 mL of 1M HCl was added to the flask and left to stir at room temperature for 1 hour. The organic layer was

extracted with Et<sub>2</sub>O (3 x 50 mL) and dried over anhydrous Na<sub>2</sub>SO<sub>4</sub>. The resulting solution was concentrated in vacuo to afford the crude aldehyde **S-6c**.

The crude 2,2-diphenylpent-4-en-1-ol **S-6c** (0.50g, 1.52 mmol, 1.00 equiv) was dissolved in EtOH (20 mL) and NaBH<sub>4</sub> (0.20g, 4.57mmol, 3.00 equiv) was added. The reaction mixture was left to stir at room temperature for 16 h and concentrated in vacuo. The crude residue was dissolved in Et<sub>2</sub>O (20mL) and 1M HCl (20 mL) was slowly added. The organic layer was separated and the aqueous layer was extracted with Et<sub>2</sub>O (3 x 30 mL). The combined organic layers were dried over anhydrous Na<sub>2</sub>SO<sub>4</sub> and concentrated in vacuo. The residue was purified by flash column chromatography on SiO<sub>2</sub> (10-40% EtOAc/hexanes, gradient) to afford 0.20 g (50% yield, 2 steps) of **18c** as a colorless oil. <sup>1</sup>H NMR (300 MHz, CDCl<sub>3</sub>) δ 7.19 (d, *J* = 8.7 Hz, 4H), 7.10 (d, *J* = 8.6 Hz, 4H), 5.48-5.39 (m, 1H), 5.14-4.95 (m, 2H), 4.08 (d, *J* = 6.5 Hz, 2H), 2.91 (d, *J* = 7.0 Hz, 2H), 2.47 (s, 6H), 1.56 (brs, 1H); <sup>13</sup>C NMR (75 MHz, CDCl<sub>3</sub>) δ 141.88, 136.42, 134.26, 128.62, 127.00, 126.69, 126.35, 118.27, 67.85, 50.91, 40.96, 15.86, 15.71; IR (neat): 3424, 2918, 1636, 1594, 1493, 1437, 1397, 1088, 1046, 1014, 958, 911, 810 cm<sup>-1</sup>; HRMS (ESI) calcd for [M + Na]<sup>+</sup> C<sub>19</sub>H<sub>22</sub>OS<sub>2</sub>: 353.1004, found: 353.1012.

### 2,2-bis(4-methoxyphenyl)pent-4-en-1-ol (**18b**)

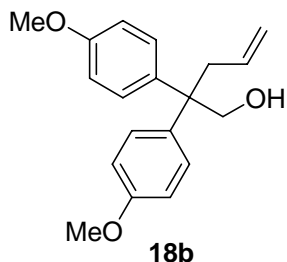

**18b** (0.20 g) was obtained as a clear oil (40% yield, 3 steps) using the same procedure as **18c**.  $^1\text{H NMR}$  (300 MHz,  $\text{CDCl}_3$ )  $\delta$  7.11 (d,  $J = 8.9$  Hz, 4H), 6.84 (d,  $J = 8.9$  Hz, 4H), 5.50-5.38 (m, 1H), 5.17-4.94 (m, 2H), 4.07 (s, 2H), 3.79 (s, 6H), 2.91 (d,  $J = 7.0$  Hz, 2H), 1.26 (brs, 1H);  $^{13}\text{C NMR}$  (75 MHz,  $\text{CDCl}_3$ )  $\delta$  157.88, 137.36, 134.74, 129.12, 117.88, 113.52, 68.12, 55.17, 50.32, 41.31; IR (neat): 3484, 2922, 2823, 1608, 1509, 1248, 1181, 1035, 828  $\text{cm}^{-1}$ ; HRMS (ESI) calcd for  $[\text{M} + \text{Na}]^+$   $\text{C}_{19}\text{H}_{22}\text{O}_3\text{Na}$ : 321.1461, found: 321.1474.

### 2,2-Bis(4-chlorophenyl)pent-4-en-1-ol (**18d**)

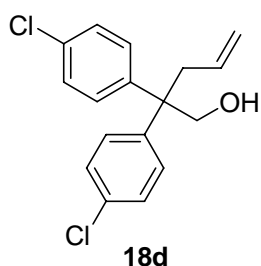

**18d** (0.80 g) was obtained as a clear oil (31% yield, 3 steps) using the same procedure as **18c**.  $^1\text{H NMR}$  (300 MHz,  $\text{CDCl}_3$ )  $\delta$  7.28 (d,  $J = 8.8$  Hz, 4H), 7.10 (d,  $J = 8.7$  Hz, 4H), 5.50-5.35 (m, 1H), 5.15-4.96 (m, 2H), 4.06 (s, 2H), 2.91-2.80 (m, 2H), 1.36 (brs, 1H);  $^{13}\text{C NMR}$  (75 MHz,  $\text{CDCl}_3$ )  $\delta$  143.37, 133.67, 132.47, 129.54, 128.71, 128.42, 127.85, 118.77, 67.66, 50.98, 40.96; IR (neat): 3376, 2941, 2868, 1637, 1597, 1492, 1402, 1094, 1013, 827  $\text{cm}^{-1}$ ; HRMS (EI) calcd for  $[\text{M}]^+$   $\text{C}_{17}\text{H}_{16}\text{OCl}_2$ : 306.0573, found: 306.0558.

### 2,2-Bis(4-fluorophenyl)pent-4-en-1-ol (**18e**)

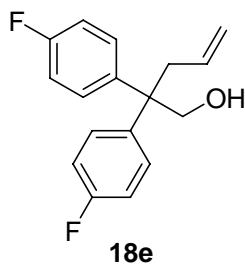

**18e** (0.50 g) was obtained as a clear oil (33% yield, 3 steps) using the same procedure as **18c**.  $^1\text{H NMR}$  (300 MHz,  $\text{CDCl}_3$ )  $\delta$  7.22-7.08 (m, 4H), 7.08-6.92 (m, 4H), 5.48-5.35 (m, 1H), 5.15-4.94 (m, 2H), 4.07 (s, 2H), 2.99-2.81 (m, 2H), 1.41 (brs, 1H);  $^{13}\text{C NMR}$  (75 MHz,  $\text{CDCl}_3$ )  $\delta$  162.95, 159.59, 140.82, 140.78, 133.95, 129.73, 129.63, 128.21, 128.11, 118.52, 115.48, 115.18, 114.90, 67.92, 50.70, 41.30; IR (neat): 3396, 3064, 2925, 1604, 1508, 1232, 1162, 832  $\text{cm}^{-1}$ ; HRMS (EI) calcd for  $[\text{M}]^+$   $\text{C}_{17}\text{H}_{16}\text{OF}_2$ : 274.1164, found: 274.1169.

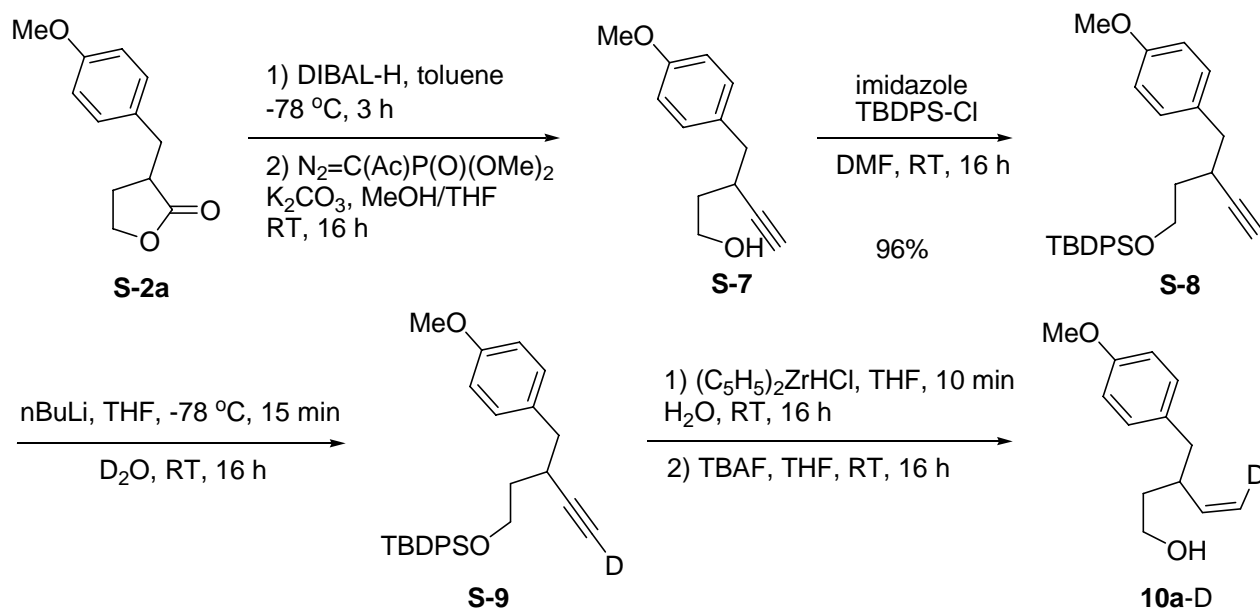

### 3-(4-Methoxybenzyl)pent-4-yn-1-ol (S-7)

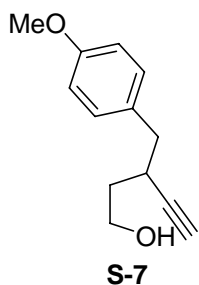

$\text{TsN}_3$  and  $\text{N}_2=\text{C}(\text{Ac})\text{P}(\text{O})(\text{OMe})_2$  were prepared following the reported procedure by Zhao et al.<sup>9</sup> Crude lactol (778 mg, 3.74 mmol, 1.0 equiv) and anhydrous  $\text{K}_2\text{CO}_3$  (2.07 g, 14.9 mmol, 4.0 equiv) was dissolved in dry MeOH (40 mL) and dry THF (5 mL) under argon at room temperature.<sup>10</sup>  $\text{N}_2=\text{C}(\text{Ac})\text{P}(\text{O})(\text{OMe})_2$  (1.00 g, 5.23 mmol, 1.4 equiv) in dry MeOH (5 mL) was added dropwise to the mixture and the reaction was stirred for 16 hours. The solvent was removed under vacuum. The resulting mixture was dissolved in Brine (40 mL) and  $\text{H}_2\text{O}$  (20 mL) and extracted with  $\text{Et}_2\text{O}$  ( $3 \times 60$  mL). The combined organic layers were dried over anhydrous  $\text{Na}_2\text{SO}_4$ , filtered and concentrated *in vacuo*. The residue was purified by flash column chromatography ( $\text{SiO}_2$ , 80:20 hexanes/ $\text{EtOAc}$ ) to afford 762 mg (76% yield, 2 steps) of **S-7** as a colorless oil.  $^1\text{H}$  NMR (500 MHz,  $\text{CDCl}_3$ )  $\delta$  7.18 – 7.13 (m, 2H), 6.86 – 6.81 (m, 2H), 3.84 – 3.78 (m, 5H), 2.82 – 2.69 (m, 3H), 2.11 (d,  $J = 1.8$  Hz, 1H), 1.82 – 1.73 (m, 1H), 1.71 – 1.60 (m, 2H);  $^{13}\text{C}$  NMR (75 MHz,  $\text{CDCl}_3$ )  $\delta$  158.1, 131.0, 130.1, 113.6, 86.6, 70.8, 60.9, 55.2, 40.3, 36.7, 30.4; IR (neat): 3290, 2936, 2360, 2339, 1612, 1513, 1465, 1300, 1247, 1179, 1035, 832  $\text{cm}^{-1}$ ; HRMS (EI) calcd for  $[\text{M}]^+$   $\text{C}_{13}\text{H}_{16}\text{O}_2$ : 204.1145, found: 204.1149.

### (3-(4-Methoxybenzyl)pent-4-ynyloxy)(tert-butyl)diphenylsilane (S-8)

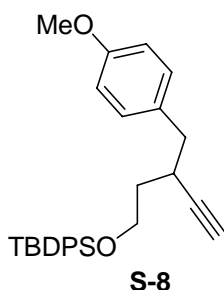

Alcohol **S-7** (550 mg, 2.70 mmol, 1.0 equiv) and imidazole (366 mg, 5.40 mmol, 2.0 equiv) was dissolved in dry DMF (30 mL) under argon at 0 °C. TBDPS-Cl (890 mg, 0.842 mL, 4.24 mmol, 1.2 equiv) was added dropwise to the mixture and the reaction was allowed to warm to room temperature and stirred for 16 hours. The reaction mixture was then quenched with water (60 mL) at 0 °C and extracted with  $\text{Et}_2\text{O}$  ( $3 \times 60$  mL). The combined organic layers were dried over anhydrous  $\text{Na}_2\text{SO}_4$ , filtered and concentrated *in vacuo*. The residue was purified by flash column chromatography ( $\text{SiO}_2$ , 95:5 hexanes/ $\text{EtOAc}$ ) to afford 1.15 g (96% yield)

of **S-8** as a colorless oil.  $^1\text{H}$  NMR (500 MHz,  $\text{CDCl}_3$ )  $\delta$  7.68 – 7.61 (m, 4H), 7.44 – 7.33 (m, 6H), 7.17 – 7.12 (m, 2H), 6.86 – 6.81 (m, 2H), 3.88 – 3.76 (m, 5H), 2.95 – 2.87 (m, 1H), 2.78 – 2.69 (m, 2H), 2.02 (d,  $J = 2.4$  Hz, 1H), 1.81 – 1.73 (m, 1H), 1.66 – 1.57 (m, 1H), 1.03 (s, 9H);  $^{13}\text{C}$  NMR (75 MHz,  $\text{CDCl}_3$ )  $\delta$  158.1, 135.6, 135.5, 133.8, 133.7, 131.4, 130.1, 129.5, 127.6, 127.5, 113.6, 86.9, 70.1, 61.4, 55.2, 40.1, 37.0, 29.9, 26.8, 19.2; IR (neat): 3294, 2932, 2858, 2360, 2339, 1612, 1513, 1247, 1110, 703  $\text{cm}^{-1}$ ; HRMS (ESI) calcd for  $[\text{M}+\text{Na}]^+$   $\text{C}_{29}\text{H}_{34}\text{O}_2\text{SiNa}$ : 465.2220, found: 465.2219.

### (3-(4-Methoxybenzyl)-5-deuteriopent-4-ynoxy)(tert-butyl)diphenylsilane (**S-9**)

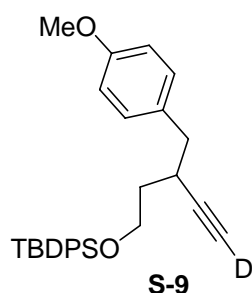

Alkyne **S-8** (200 mg, 0.452 mmol, 1.0 equiv) was dissolved in dry THF (15 mL) under argon and cooled to  $-78$   $^\circ\text{C}$ .  $n\text{BuLi}$  (1.6 M in hexanes, 0.340 mL, 0.542 mmol, 1.2 equiv) was added dropwise to the mixture and the reaction was allowed to stir for 15 minutes. The reaction mixture was quenched with  $\text{D}_2\text{O}$  (5 mL) then warm to room temperature and stirred for 16 hours. The mixture was diluted with  $\text{Et}_2\text{O}$  (40 mL) and the aqueous layer was removed by pipette. The organic layer were dried over anhydrous  $\text{Na}_2\text{SO}_4$ , filtered and concentrated *in vacuo*. The residue was purified by flash column chromatography ( $\text{SiO}_2$ , 95:5 hexanes/ $\text{EtOAc}$ ) to afford 160 mg (80% yield) of **S-9** as a colorless oil.  $^1\text{H}$  NMR (500 MHz,  $\text{CDCl}_3$ )  $\delta$  7.69 – 7.60 (m, 4H), 7.44 – 7.33 (m, 6H), 7.14 (d,  $J = 8.5$  Hz, 2H), 6.86 – 6.80 (m, 2H), 3.90 – 3.74 (m, 5H), 2.95 – 2.86 (m, 1H), 2.79 – 2.68 (m, 2H), 1.82 – 1.72 (m, 1H), 1.66 – 1.57 (m, 1H), 1.03 (s, 9H);  $^{13}\text{C}$  NMR (75 MHz,  $\text{CDCl}_3$ )  $\delta$  158.1, 135.6, 135.5, 133.8, 131.4, 130.2, 129.5, 127.6, 127.6, 113.6, 61.4, 55.2, 40.2, 37.0, 29.9, 26.8, 19.2; IR (neat): 2931, 2588, 2360, 1512, 1247, 1110, 703  $\text{cm}^{-1}$ ; HRMS (ESI) calcd for  $[\text{M}+\text{Na}]^+$   $\text{C}_{29}\text{H}_{33}\text{DO}_2\text{SiNa}$ : 466.2283, found: 465.2290.

### (Z)-3-(4-Methoxybenzyl)-5-deuteriopent-4-en-1-ol (**10a-D**)

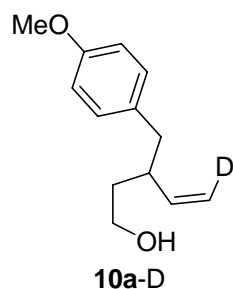

Alkyne **S-9** (197 mg, 0.444 mmol, 1.0 equiv) was dissolved in dry THF (10 mL) under argon at room temperature.<sup>11</sup>  $(\text{C}_5\text{H}_5)_2\text{ZrHCl}$  (Schwartz's reagent, 229 mg, 0.888 mmol, 2.0 equiv) was added in one portion and the reaction was stirred for 10 minutes. The reaction mixture was quenched with  $\text{H}_2\text{O}$  (2 mL) then stirred for 16 hours. The mixture was diluted with  $\text{Et}_2\text{O}$  (60 mL) and the aqueous layer was removed by pipette. The organic layer were dried over anhydrous  $\text{Na}_2\text{SO}_4$ , filtered and concentrated *in vacuo* to afford the crude alkene.

The crude alkene was treated with  $\text{TBAF}\cdot 3\text{H}_2\text{O}$  (418 mg, 1.33 mmol, 3.0 equiv) in THF (40 mL) at room temperature and stirred for 16 hours. The solvent was removed under vacuum. The residue was purified by flash column chromatography ( $\text{SiO}_2$ , 60:40 hexanes/ $\text{EtOAc}$ ) to afford 67 mg (73% yield, 2 steps) of **10a-D** as a colorless oil.  $^1\text{H}$  NMR (500 MHz,  $\text{CDCl}_3$ )  $\delta$  7.09 – 7.02 (m, 2H), 6.84 – 6.78 (m, 2H), 5.63 (ddd,  $J = 2.4, 4.8, 11.1$  Hz, 1H), 4.96 (d,  $J = 10.5$  Hz, 1H), 3.78 (s, 3H), 3.70 – 3.56 (m, 2H), 2.60 (d,  $J = 7.2$  Hz, 2H), 2.47 – 2.38 (m, 1H), 1.74 – 1.66 (m, 1H), 1.54 – 1.45 (m, 1H), 1.36 (s, 1H);  $^{13}\text{C}$  NMR (75 MHz,  $\text{CDCl}_3$ )  $\delta$  157.7, 141.9, 132.1, 130.1, 114.9 (t,  $J_{\text{CD}} = 23.0$  Hz), 113.5, 61.2, 55.2, 42.8, 41.0, 36.7; IR (neat): 3358, 2931, 2360, 1612, 1512, 1464, 1246, 1178, 1037, 807  $\text{cm}^{-1}$ ; HRMS (EI) calcd for  $[\text{M}]^+$   $\text{C}_{13}\text{H}_{17}\text{DO}_2$ : 207.1364, found: 207.1370.

### General Cu(OTf)<sub>2</sub>-catalyzed carboetherification procedure (Method A)

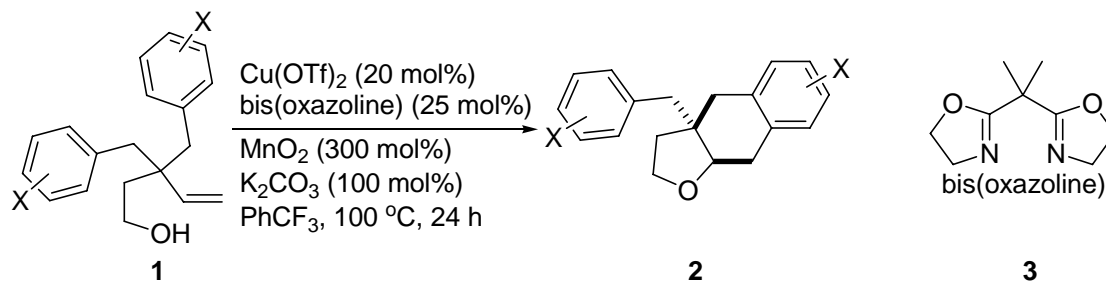

$\text{Cu(OTf)}_2$  (20 mol%), bis(oxazoline) **3**<sup>1</sup> (25 mol%) and  $\text{PhCF}_3$  (0.1 M with respect to substrate) were combined in a pressure tube equipped with a magnetic stir bar under argon. The mixture was stirred at 60 °C for 2 hours then cooled to room temperature. The solution was treated with  $\text{MnO}_2$  (3.0 equiv),  $\text{K}_2\text{CO}_3$  (1.0 equiv) and alcohol substrate (1.0 equiv, 0.0730 – 0.210 mmol scale). The tube was refreshed by argon for 2 minutes, sealed and heated at 100 °C in an oil bath for 24 hours. Filtration of the cooled solution and removal of the solvent *in vacuo* afforded a crude residue. Chromatography on  $\text{SiO}_2$  (10 – 20% EtOAc in hexanes) afforded purified product.

### Representative procedure for Cu(OTf)<sub>2</sub>-catalyzed carboetherification (Method A):

#### (±)-*cis*-3a-Benzyl-2,3,3a,4,9,9a-hexahydronaphtho[2,3-*b*]furan (2a)

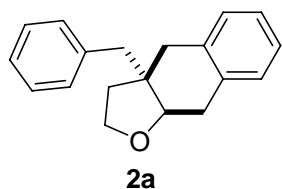

$\text{Cu(OTf)}_2$  (13.6 mg, 0.0376 mmol, 20 mol%) and bis(oxazoline) **3**<sup>1</sup> (8.56 mg, 0.0470 mmol, 25 mol%) were put into a 12 mL pressure tube with a stirring bar.  $\text{PhCF}_3$  (0.6 mL) was syringed into the tube, and the vessel was refreshed with argon for 2 min, sealed and stirred at 60 °C for 2 hours. Upon cooling to room temperature,  $\text{K}_2\text{CO}_3$  (26.0 mg, 0.188 mmol, 1.0 equiv) and  $\text{MnO}_2$  (49.0 mg, 0.564 mmol, 3.0 equiv) were added. Alcohol **1a** (50 mg, 0.188 mmol) was dissolved in  $\text{PhCF}_3$  (1.0 mL) in a 20 mL vial and the solution was transferred into the reaction tube. The vial was rinsed with  $\text{PhCF}_3$  (0.28 mL) and the rinse was added to the reaction. The tube was refreshed with argon for 2 minutes, sealed and stirred at 100 °C. After 24 hours, the reaction mixture was cooled to room temperature, diluted with  $\text{CH}_2\text{Cl}_2$  (3 mL) and vacuum filtered through a pad of silica gel (5 g). The silica gel was further rinsed with EtOAc (3 × 30 mL) and the combined filtrate was concentrated *in vacuo*. The residue was purified by flash column chromatography ( $\text{SiO}_2$ , 90:10 hexanes/EtOAc) to afford 49 mg (98% yield) of **2a** as a clear oil.

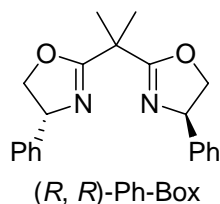

$\text{Cu(OTf)}_2$ -catalyzed enantioselective carboetherification (Method B) used the same procedure as Method A except 25 mol% of (R, R)-Ph-Box ligand is used instead of **3**.

**Representative procedure for the Cu(EH)<sub>2</sub>-promoted carboetherification (Method C):**

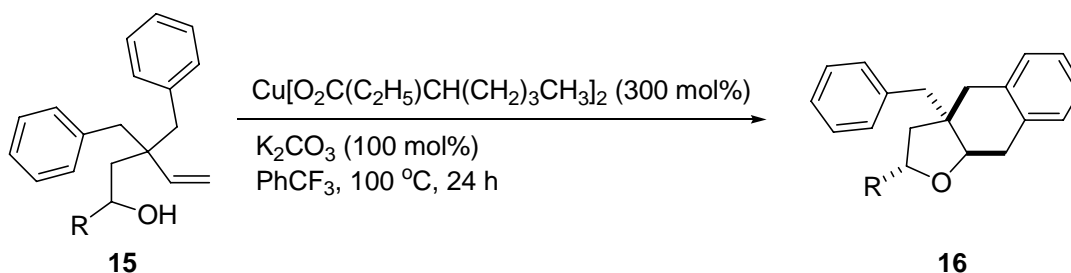

Copper(II) 2-ethylhexanoate (153 mg, 0.438 mmol, 3.0 equiv.),  $\text{K}_2\text{CO}_3$  (20.2 mg, 0.146 mmol, 1.0 equiv), alcohol **15a** (50.0 mg, 0.146 mmol) and  $\text{PhCF}_3$  (1.46 mL) were put into a 12 mL pressure tube with a stirring bar. The tube was refreshed with argon for 2 minutes, sealed and stirred at 100 °C. After 24 hours, the reaction mixture was cooled to room temperature, diluted with  $\text{CH}_2\text{Cl}_2$  (25 mL), washed with saturated  $\text{Na}_2\text{EDTA}$  solution (15 mL) and 1N  $\text{NaOH}$  (15 mL), dried over anhydrous  $\text{Na}_2\text{SO}_4$ , filtered and concentrated *in vacuo*. The residue was purified by flash column chromatography ( $\text{SiO}_2$ , 95:5 hexanes/EtOAc) to afford a 12:1 mixture of **16a:17a** (43 mg, 86% yield) as a clear oil.

**General procedure for the Cu(EH)<sub>2</sub>-catalyzed carboetherification (Method D):**

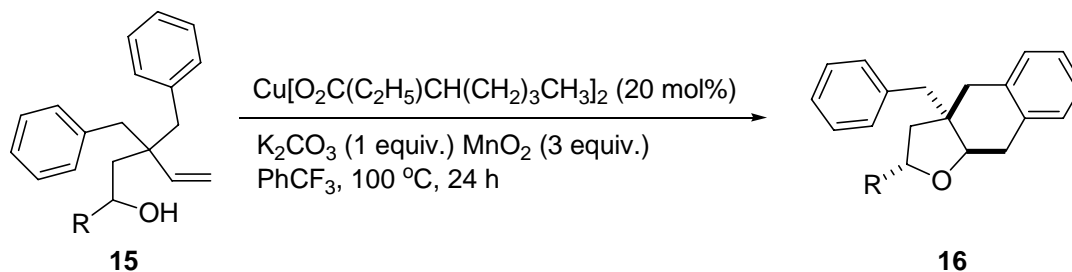

$\text{Cu}(\text{EH})_2$  (13.2 mg, 0.0376 mmol, 20 mol%),  $\text{K}_2\text{CO}_3$  (26.0 mg, 0.188 mmol, 1.0 equiv),  $\text{MnO}_2$  (49.0 mg, 0.564 mmol, 3.0 equiv), alcohol substrate (1 equiv., 0.188 mmol) and  $\text{PhCF}_3$  (1.6 mL) were put into a 12 mL pressure tube with a stirring bar. The tube was refreshed with argon for 2 minutes, sealed and stirred at 100 °C. After 24 hours, the reaction mixture was cooled to room temperature, filtered through silica gel and concentrated *in vacuo*. The crude residue was purified by flash column chromatography ( $\text{SiO}_2$ , 10-20% EtOAc in hexanes) to afford purified product.

**(±)-*cis*-3a-Benzyl-2,3,3a,4,9,9a-hexahydronaphtho[2,3-*b*]furan (2a)**

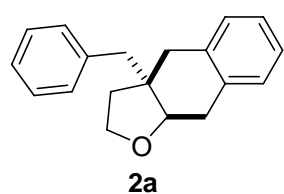

Tetrahydronaphthofuran **2a** (49 mg) was obtained from the catalytic carboetherification (Method A) of **1a** as a clear oil (98% yield).  $^1\text{H}$  NMR (500 MHz,  $\text{CDCl}_3$ )  $\delta$  7.35 – 7.03 (m, 9H), 4.11 (t,  $J$  = 4.4 Hz, 1H), 3.68 – 3.55 (m, 2H), 2.88 (dd,  $J$  = 4.0, 15.3 Hz, 1H), 2.80 – 2.66 (m, 3H), 2.56 (ABq,  $J_{\text{AB}}$  = 14.5,  $\Delta\nu$  = 65.4 Hz, 2H), 2.04 – 1.96 (m, 1H), 1.49 – 1.40 (m, 1H);  $^{13}\text{C}$  NMR (75



MHz, CDCl<sub>3</sub>)  $\delta$  138.3, 136.9, 135.9, 130.5, 128.2, 128.1, 128.0, 126.4, 126.3, 126.2, 83.6, 66.1, 46.9, 45.1, 38.1, 37.6, 34.5; IR (neat): 3025, 2938, 2849, 1492, 1454, 1073, 754, 704 cm<sup>-1</sup>; HRMS (EI) calcd for [M]<sup>+</sup> C<sub>19</sub>H<sub>20</sub>O: 264.1509, found: 264.1516. The relative stereochemistry of **2a** was assigned by NOE.

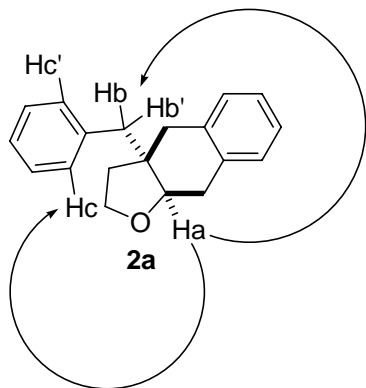

**(±)-cis-7-Methyl-3a-(4-methylbenzyl)-2,3,3a,4,9,9a-hexahydronaphtho[2,3-*b*]furan (2b)**

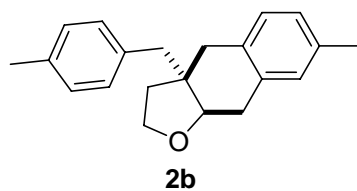

Tetrahydronaphthofuran **2b** (47 mg) was obtained from the catalytic carboetherification (Method A) of **1b** as a clear oil (94% yield). <sup>1</sup>H NMR (500 MHz, CDCl<sub>3</sub>)  $\delta$  7.15 – 7.07 (m, 4H), 6.99 (s, 1H), 6.95 (d, *J* = 0.9 Hz, 2H), 4.08 (t, *J* = 4.3 Hz, 1H), 3.68 – 3.54 (m, 2H), 2.83 (dd, *J* = 3.9, 15.3 Hz, 1H), 2.76 – 3.54 (m, 3H), 2.51 (ABq, *J*<sub>AB</sub> = 14.5,  $\Delta\nu$  = 66.1 Hz, 2H), 2.34 (s, 3H), 2.30 (s, 3H), 2.01 – 1.94 (m, 1H), 1.47 – 1.38 (m, 1H); <sup>13</sup>C NMR (75 MHz, CDCl<sub>3</sub>)  $\delta$  135.9, 135.8, 135.8, 135.2, 133.8, 130.4, 129.0, 128.8, 127.9, 126.8, 83.7, 66.1, 47.0, 44.8, 37.8, 37.5, 34.5, 21.1, 21.0; IR (neat): 3005, 2918, 2858, 1512, 1444, 1219, 1061, 1005, 813 cm<sup>-1</sup>; HRMS (EI) calcd for [M]<sup>+</sup> C<sub>21</sub>H<sub>24</sub>O: 292.1822, found: 292.1827. The relative stereochemistry of **2b** was assigned by analogy to **2a**.

**(±)-cis-3a-(4-Methoxybenzyl)-7-methoxy-2,3,3a,4,9,9a-hexahydronaphtho[2,3-*b*]furan (2c)**

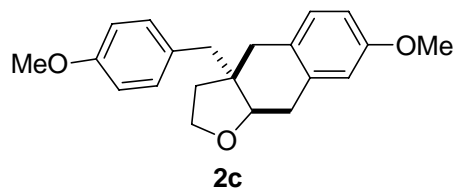

Tetrahydronaphthofuran **2c** (47 mg) was obtained from the catalytic carboetherification (Method A) of **1c** as a clear oil (94% yield). <sup>1</sup>H NMR (500 MHz, CDCl<sub>3</sub>)  $\delta$  7.12 (d, *J* = 8.6 Hz, 2H), 6.97 (d, *J* = 8.2 Hz, 1H), 6.86 (dd, *J* = 4.8, 6.7 Hz, 2H), 6.75 (d, *J* = 2.5 Hz, 1H), 6.69 (dd, *J* = 2.6, 8.1 Hz, 1H), 4.07 (t, *J* = 4.3 Hz, 1H), 3.80 (s, 3H), 3.78 (s, 3H), 3.68 – 3.54 (m, 2H), 2.84 (dd, *J* = 3.9, 15.3 Hz, 1H), 2.77 – 2.60 (m, 3H), 2.48 (ABq, *J*<sub>AB</sub> = 14.0,  $\Delta\nu$  = 58.0 Hz, 2H), 2.00 – 1.92 (m, 1H), 1.48 – 1.40 (m, 1H); <sup>13</sup>C NMR (75 MHz, CDCl<sub>3</sub>)  $\delta$  158.3, 158.2, 137.1, 131.4, 130.4, 129.0, 128.7, 113.8, 113.5, 111.5, 83.4, 66.2, 55.2, 55.2, 47.1, 44.2, 37.5, 37.3, 34.9; IR (neat): 2937, 2908, 2835, 1611, 1511, 1250, 1037, 825 cm<sup>-1</sup>; HRMS (EI) calcd for [M]<sup>+</sup> C<sub>21</sub>H<sub>24</sub>O<sub>3</sub>: 324.1720, found: 324.1724. The relative stereochemistry of **2c** was assigned by analogy to **2a**.

**(±)-cis-3a-(4-(Methylthio)benzyl)-7-(methylthio)-2,3,3a,4,9,9a-hexahydronaphtho[2,3-*b*]furan (2d)**

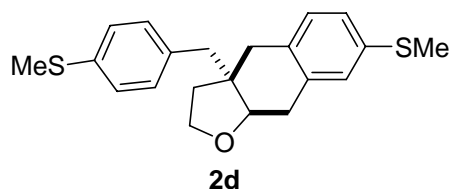

Tetrahydronaphthofuran **2d** (44 mg) was obtained from the catalytic carboetherification (Method A) of **1d** as a clear oil (88% yield). <sup>1</sup>H NMR (500 MHz, CDCl<sub>3</sub>) δ 7.24 – 7.19 (m, 2H), 7.15 – 7.03 (m, 4H), 6.98 (d, *J* = 7.8 Hz, 1H), 4.07 (t, *J* = 4.3 Hz, 1H), 3.69 – 3.55 (m, 2H), 2.84 (dd, *J* = 3.9, 15.4 Hz, 1H), 2.77 – 2.40 (m, 11H), 2.00 – 1.93 (m, 1H), 1.49 – 1.40 (m, 1H); <sup>13</sup>C NMR (75 MHz, CDCl<sub>3</sub>) δ 136.6, 136.3, 135.9, 135.1, 134.0, 130.9, 128.5, 126.7, 126.4, 124.8, 83.3, 66.1, 47.0, 44.5, 37.5, 37.5, 34.5, 16.1, 15.9; IR (neat): 2918, 2360, 1600, 1491, 1436, 1092, 1059, 1004, 956, 816 cm<sup>-1</sup>; HRMS (EI) calcd for [M]<sup>+</sup> C<sub>21</sub>H<sub>24</sub>OS<sub>2</sub>: 356.1263, found: 356.1264. The relative stereochemistry of **2d** was assigned by analogy to **2a**.

**(±)-cis-3a-(4-Bromobenzyl)-7-bromo-2,3,3a,4,9,9a-hexahydronaphtho[2,3-*b*]furan (2e)**

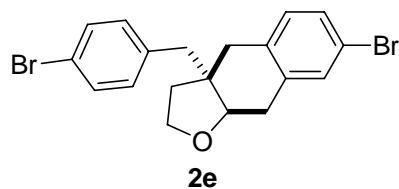

Tetrahydronaphthofuran **2e** (44 mg) was obtained from the catalytic carboetherification (Method A, reaction run at 110 °C) of **1e** as a clear oil (88% yield). <sup>1</sup>H NMR (500 MHz, CDCl<sub>3</sub>) δ 7.46 – 7.42 (m, 2H), 7.31 (d, *J* = 1.7 Hz, 1H), 7.28 (dd, *J* = 2.0, 7.9 Hz, 1H), 7.08 – 7.03 (m, 2H), 6.92 (d, *J* = 7.9 Hz, 1H), 4.06 (t, *J* = 4.2 Hz, 1H), 3.69 – 3.56 (m, 2H), 2.85 (dd, *J* = 3.8, 15.5 Hz, 1H), 2.75 – 2.60 (m, 3H), 2.46 (ABq, *J*<sub>AB</sub> = 14.5, Δ*v* = 25.3 Hz, 2H), 1.99 – 1.91 (m, 1H), 1.47 – 1.39 (m, 1H); <sup>13</sup>C NMR (75 MHz, CDCl<sub>3</sub>) δ 138.1, 136.9, 135.6, 132.0, 131.3, 131.1, 129.6, 129.3, 120.5, 120.1, 82.9, 66.0, 46.7, 44.3, 37.5, 37.4, 34.1; IR (neat): 2939, 2853, 1594, 1485, 1443, 1405, 1073, 1010, 814, 729 cm<sup>-1</sup>; HRMS (EI) calcd for [M]<sup>+</sup> C<sub>19</sub>H<sub>18</sub>Br<sub>2</sub>O: 419.9719, found: 419.9717. The relative stereochemistry of **2e** was assigned by analogy to **2a**.

**(±)-cis-3a-(4-Chlorobenzyl)-7-chloro-2,3,3a,4,9,9a-hexahydronaphtho[2,3-*b*]furan (2f)**

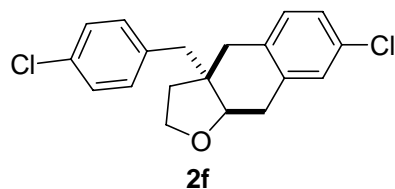

Tetrahydronaphthofuran **2f** (85 mg) was obtained from the catalytic carboetherification (Method A, reaction run at 120 °C) of **1f** as a clear oil (85% yield). <sup>1</sup>H NMR (500 MHz, CDCl<sub>3</sub>) δ 7.35 – 7.30 (m, 2H), 7.22 – 7.12 (m, 4H), 7.01 (d, *J* = 8.0 Hz, 1H), 4.10 (t, *J* = 4.2 Hz, 1H), 3.72 – 3.59 (m, 2H), 2.89 (dd, *J* = 3.8, 15.5 Hz, 1H), 2.78 – 2.66 (m, 3H), 2.52 (ABq, *J*<sub>AB</sub> = 15.0, Δ*v* = 29.6 Hz, 2H), 2.03 – 1.95 (m, 1H), 1.52 – 1.43 (m, 1H); <sup>13</sup>C NMR (75 MHz, CDCl<sub>3</sub>) δ 137.7, 136.4, 135.0, 132.4, 132.0, 131.7, 129.2, 128.3, 128.3, 126.3, 82.9, 66.1, 46.8, 44.3, 37.5, 37.4, 34.2; IR (neat): 2939, 2854, 1599, 1489, 1443, 1409, 1089, 1060, 1014, 820 cm<sup>-1</sup>; HRMS (EI) calcd for [M]<sup>+</sup> C<sub>19</sub>H<sub>18</sub>Cl<sub>2</sub>O: 332.0729, found: 332.0733. The relative stereochemistry of **2f** was assigned by analogy to **2a**.

**(±)-cis-3a-(4-Fluorobenzyl)-7-fluoro-2,3,3a,4,9,9a-hexahydronaphtho[2,3-*b*]furan (2g)**

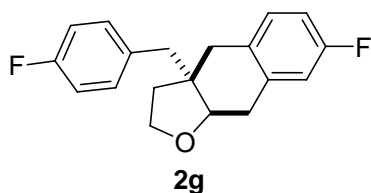

Tetrahydronaphthofuran **2g** (36 mg) was obtained from the catalytic carboetherification (Method A, reaction run at 120 °C) of **1g** as a clear oil (72% yield). <sup>1</sup>H NMR (500 MHz, CDCl<sub>3</sub>) δ 7.19 – 7.12 (m, 2H), 7.05 – 6.96 (m, 3H), 6.92 – 6.80 (m, 2H), 4.08 (t, *J* = 4.2 Hz, 1H), 3.69 – 3.54 (m, 2H), 2.87 (dd, *J* = 3.7, 15.5 Hz, 1H), 2.76 – 2.64 (m, 3H), 2.49 (ABq, *J*<sub>AB</sub> = 14.5, Δ*v* = 33.9 Hz, 2H), 2.00 – 1.91 (m, 1H), 1.49 – 1.40 (m, 1H); <sup>13</sup>C NMR (75 MHz, CDCl<sub>3</sub>) δ 161.7 (d, *J*<sub>CF</sub> = 243.8 Hz), 161.6 (d, *J*<sub>CF</sub> = 242.6 Hz), 137.80 (d, *J*<sub>CF</sub> = 7.9 Hz), 133.7 (d, *J*<sub>CF</sub> = 3.4 Hz), 132.1 (d, *J*<sub>CF</sub> = 2.3 Hz), 131.8 (d, *J*<sub>CF</sub> = 6.8 Hz), 129.1 (d, *J*<sub>CF</sub> = 8.0 Hz), 115.2 (d, *J*<sub>CF</sub> = 20.6 Hz), 115.0 (d, *J*<sub>CF</sub> = 20.6 Hz), 112.8 (d, *J*<sub>CF</sub> = 21.7 Hz), 83.0, 66.1, 46.9, 44.1, 37.5, 37.3, 34.5; IR (neat): 2940, 2854, 1600, 1509, 1442, 1252, 1222, 1139, 1060, 829 cm<sup>-1</sup>; HRMS (EI) calcd for [M]<sup>+</sup> C<sub>19</sub>H<sub>18</sub>F<sub>2</sub>O: 300.1320, found: 300.1320. The relative stereochemistry of **2g** was assigned by analogy to **2a**.

**(±)-cis-3a-(4-(Trifluoromethyl)benzyl)-7-(trifluoromethyl)-2,3,3a,4,9,9a-hexahydronaphtho[2,3-*b*]furan (2h)**

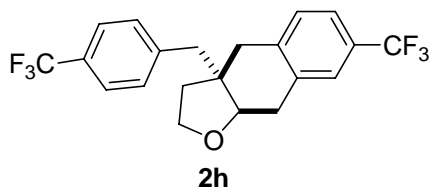

Tetrahydronaphthofuran **2h** (45 mg) was obtained from the catalytic carboetherification (Method A, reaction run at 110 °C) of **1h** as a clear oil (90% yield). <sup>1</sup>H NMR (500 MHz, CDCl<sub>3</sub>) δ 7.59 (d, *J* = 8.0 Hz, 2H), 7.42 (d, *J* = 8.4 Hz, 2H), 7.31 (d, *J* = 8.0 Hz, 2H), 7.16 (d, *J* = 7.6 Hz, 1H), 4.13 (t, *J* = 4.2 Hz, 1H), 3.72 – 3.59 (m, 2H), 2.97 (dd, *J* = 3.7, 15.6 Hz, 1H), 2.86 – 2.73 (m, 3H), 2.59 (ABq, *J*<sub>AB</sub> = 14.5, Δ*v* = 22.3 Hz, 2H), 2.05 – 1.97 (m, 1H), 1.51 – 1.43 (m, 1H); <sup>13</sup>C NMR (75 MHz, CDCl<sub>3</sub>) δ 142.0, 140.6, 136.5, 130.7, 129.2 (d, *J*<sub>CF</sub> = 5.3 Hz), 128.7 (d, *J*<sub>CF</sub> = 5.0 Hz), 128.3, 126.0 (d, *J*<sub>CF</sub> = 8.0 Hz), 125.1 (m), 123.3 (q, *J*<sub>CF</sub> = 4.6 Hz), 122.4 (d, *J*<sub>CF</sub> = 7.8 Hz), 82.9, 66.0, 46.8, 44.7, 37.8, 37.7, 34.2; IR (neat): 2942, 2862, 1619, 1440, 1420, 1327, 1162, 1120, 1068, 1018, 832 cm<sup>-1</sup>; HRMS (EI) calcd for [M]<sup>+</sup> C<sub>21</sub>H<sub>28</sub>F<sub>6</sub>O: 400.1256, found: 400.1260. The relative stereochemistry of **2h** was assigned by analogy to **2a**.

**(±)-cis-3a-(3-Methoxybenzyl)-8-methoxy-2,3,3a,4,9,9a-hexahydronaphtho[2,3-*b*]furan (5)**

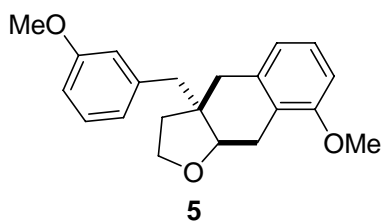

Tetrahydronaphthofurans **5** and **6** (49 mg) were obtained from the catalytic carboetherification (Method A) of **4** [98% yield, **5** : **6** (1.9 : 1)]. They were separated by prep HPLC using EtOAc/hexanes (**5** eluted first). Tetrahydronaphthofuran **5** was obtained as a clear oil. <sup>1</sup>H NMR (500 MHz, CDCl<sub>3</sub>) δ 7.25 – 7.19 (m, 1H), 7.11 (t, *J* = 7.8 Hz, 1H), 6.82 – 6.68 (m, 5H), 4.02 (dd, *J* = 3.3, 5.1 Hz, 1H), 3.81 (s, 3H), 3.80 (s, 3H), 3.78 – 3.65 (m, 2H), 3.08 (dd, *J* = 3.3, 16.7 Hz, 1H), 2.73 (dd, *J* = 5.2, 16.7 Hz, 1H), 2.67 – 2.60 (m, 2H), 2.53 (ABq, *J*<sub>AB</sub> = 15.0, Δ*v* = 27.7 Hz, 2H), 2.06 – 1.98 (m, 1H), 1.56 – 1.47 (m, 1H); <sup>13</sup>C NMR (75 MHz, CDCl<sub>3</sub>) δ 159.3, 157.0, 139.9, 137.9, 128.9, 126.4, 123.2, 122.8, 120.8, 116.4, 111.3, 108.1, 82.5, 65.7, 55.3, 55.1, 45.9, 43.8, 37.5, 36.8, 26.1; IR (neat): 2936, 2835, 1588, 1488, 1470, 1454, 1439, 1308, 1262,

1154, 1082, 1062, 1047, 1006, 780, 768, 710  $\text{cm}^{-1}$ ; HRMS (EI) calcd for  $[\text{M}]^+$   $\text{C}_{21}\text{H}_{24}\text{O}_3$ : 324.1720, found: 324.1723. The relative stereochemistry of **5** was assigned by analogy to **2a**. The regiochemistry of **5** was assigned by NOE.

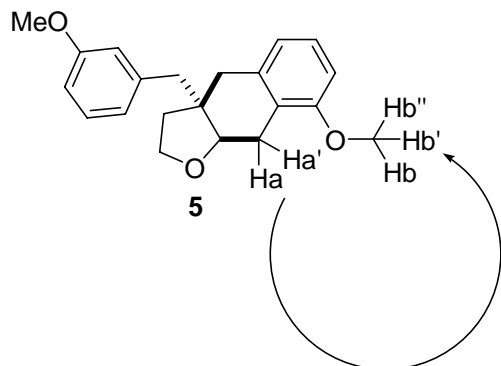

**(±)-cis-3a-(3-Methoxybenzyl)-6-methoxy-2,3,3a,4,9,9a-hexahydronaphtho[2,3-*b*]furan (6)**

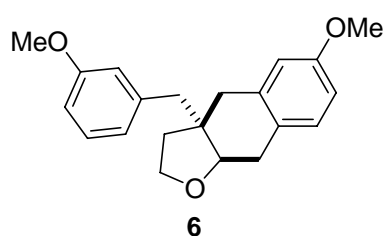

Tetrahydronaphthofuran **6** was obtained as a clear oil.  $^1\text{H}$  NMR (500 MHz,  $\text{CDCl}_3$ )  $\delta$  7.27 – 7.21 (m, 1H), 7.08 (d,  $J = 8.2$  Hz, 1H), 6.81 (dd,  $J = 2.1, 7.9$  Hz, 2H), 6.77 – 6.74 (m, 1H), 6.71 (dd,  $J = 2.6, 8.2$  Hz, 1H), 6.66 (d,  $J = 2.5$  Hz, 1H), 4.08 (t,  $J = 4.3$  Hz, 1H), 3.82 (s, 3H), 3.77 (s, 3H), 3.71 – 3.57 (m, 1H), 2.82 (dd,  $J = 4.0, 15.3$  Hz, 1H), 2.75 – 2.64 (m, 3H), 2.54 (ABq,  $J_{\text{AB}} = 14.5$ ,  $\Delta\nu = 68.8$  Hz, 2H), 2.05 – 1.97 (m, 1H),

1.51 – 1.43 (m, 1H);  $^{13}\text{C}$  NMR (75 MHz,  $\text{CDCl}_3$ )  $\delta$  159.3, 158.1, 139.8, 138.2, 129.0, 128.8, 127.8, 123.0, 116.6, 114.1, 111.3, 111.3, 83.7, 66.1, 55.2, 55.1, 46.8, 45.2, 38.4, 37.7, 33.6; IR (neat): 2938, 2834, 1610, 1583, 1500, 1464, 1453, 1435, 1262, 1154, 1062, 1040, 787, 705  $\text{cm}^{-1}$ ; HRMS (EI) calcd for  $[\text{M}]^+$   $\text{C}_{21}\text{H}_{24}\text{O}_3$ : 324.1720, found: 324.1721. The relative stereochemistry of **6** was assigned by analogy to **2a**. The regiochemistry of **6** was assigned by analysis of the  $^1\text{H}$  NMR (two aromatic protons with no vicinal coupling) and process of elimination.

**(±)-cis-3a-(2-Methoxybenzyl)-5-methoxy-2,3,3a,4,9,9a-hexahydronaphtho[2,3-*b*]furan (8a)**

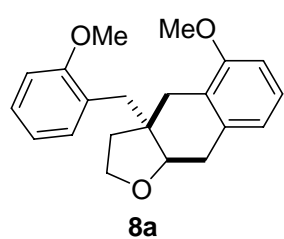

Tetrahydronaphthofurans **8a** and **9a** (48 mg) were obtained from the catalytic carboetherification (Method A) of **7a** [96% yield, **8a** : **9a** (1.3 : 1)]. They were separated by prep HPLC using EtOAc/hexanes (**8a** eluted first). Tetrahydronaphthofuran **8a** was obtained as a clear oil.  $^1\text{H}$  NMR (500 MHz,  $\text{CDCl}_3$ )  $\delta$  7.26 – 7.16 (m, 2H), 7.11 (t,  $J = 7.8$  Hz, 1H), 6.94 – 6.84 (m, 2H), 6.80 (d,  $J = 7.4$  Hz, 1H), 6.73 (d,  $J = 8.2$  Hz, 1H), 4.09 (t,  $J = 4.0$  Hz, 1H), 3.78

(d,  $J = 7.6$  Hz, 6H), 3.69 – 3.54 (m, 2H), 2.93 – 2.84 (m, 2H), 2.81 – 2.67 (m, 3H), 2.57 (d,  $J = 15.3$  Hz, 1H), 2.01 – 1.93 (m, 1H), 1.46 – 1.36 (m, 1H);  $^{13}\text{C}$  NMR (75 MHz,  $\text{CDCl}_3$ )  $\delta$  157.8, 156.6, 137.2, 132.4, 127.5, 127.0, 126.4, 125.1, 120.8, 120.0, 110.4, 108.0, 82.7, 66.1, 55.3, 55.0, 46.6, 37.7, 37.7, 34.2, 29.9; IR (neat): 2940, 2836, 1589, 1493, 1470, 1440, 1263, 1244, 1070, 1029, 755  $\text{cm}^{-1}$ ; HRMS (EI) calcd for

$[M]^+$   $C_{21}H_{24}O_3$ : 324.1720, found: 324.1721. The relative stereochemistry of **8a** was assigned by analogy to **2a**. The regiochemistry of **8a** was assigned by process of elimination (it was not **9a**).

**(±)-cis-3a-(2-Methoxybenzyl)-8-methoxy-2,3,3a,4,9,9a-hexahydronaphtho[2,3-*b*]furan (9a)**

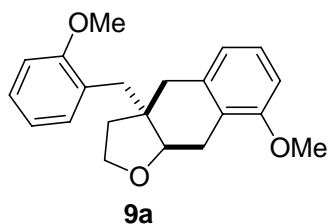

Tetrahydronaphthofuran **9a** was obtained as a clear oil.  $^1H$  NMR (500 MHz,  $CDCl_3$ )  $\delta$  7.25 – 7.20 (m, 1H), 7.14 (dd,  $J = 1.7, 7.4$  Hz, 1H), 7.09 (t,  $J = 7.9$  Hz, 1H), 6.93 – 6.85 (m, 2H), 6.71 (dd,  $J = 7.8, 12.8$  Hz, 2H), 4.07 (dd,  $J = 3.1, 4.8$  Hz, 1H), 3.81 (s, 3H), 3.78 (s, 3H), 3.72 – 3.60 (m, 2H), 3.14 (dd,  $J = 3.0, 16.5$  Hz, 1H), 2.86 (d,  $J = 13.2$  Hz, 1H), 2.71 – 2.58 (m, 3H), 2.53 (d,  $J = 14.9$  Hz, 1H), 2.02 – 1.96 (m, 1H), 1.47 – 1.39 (m, 1H);  $^{13}C$  NMR (75

MHz,  $cdcl_3$ )  $\delta$  157.8, 157.0, 138.4, 132.3, 127.6, 127.0, 126.2, 123.6, 120.8, 120.03, 110.4, 108.0, 82.5, 65.8, 55.4, 55.0, 46.4, 37.5, 37.1, 37.1, 26.3; IR (neat): 2936, 1588, 1492, 1470, 1244, 1080, 754  $cm^{-1}$ ; HRMS (EI) calcd for  $[M]^+$   $C_{21}H_{24}O_3$ : 324.1720, found: 324.1721. The relative stereochemistry of **9a** was assigned by analogy to **2a**. the regiochemistry of **9a** was assigned by NOE.

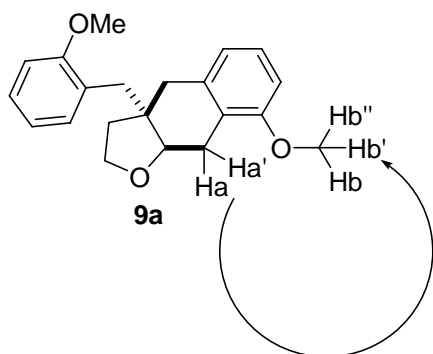

**(±)-cis-5-Methyl-3a-(2-methylbenzyl)-2,3,3a,4,9,9a-hexahydronaphtho[2,3-*b*]furan (8b)**

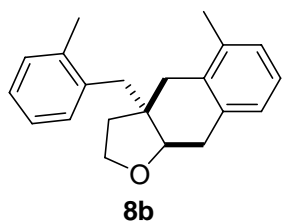

Tetrahydronaphthofurans **8b** and **9b** (47 mg) were obtained from the catalytic carboetherification (Method A) of **7b** [94% yield, **8b** : **9b** (4.5 : 1)]. They were separated by prep HPLC using EtOAc/hexanes (**9b** eluted first). Tetrahydronaphthofuran **8b** was obtained as a clear oil.  $^1H$  NMR (500 MHz,  $CDCl_3$ )  $\delta$  7.24 – 7.11 (m, 4H), 7.07 – 6.98 (m, 3H), 4.11 (t,  $J = 4.5$  Hz, 1H), 3.70 – 3.58 (m, 2H), 2.93 (dd,  $J = 3.2, 15.9$  Hz, 1H), 2.85 – 2.74 (m, 3H), 2.57

(ABq,  $J_{AB} = 15.0$ ,  $\Delta\nu = 81.1$  Hz, 2H), 2.20 (s, 3H), 2.16 (s, 3H), 2.02 – 1.95 (m, 1H), 1.62 – 1.52 (m, 1H);  $^{13}C$  NMR (75 MHz,  $CDCl_3$ )  $\delta$  137.0, 136.8, 135.2, 135.2, 134.9, 130.7, 130.6, 127.8, 126.4, 126.2, 125.8, 125.6, 82.4, 66.0, 47.1, 40.3, 38.3, 34.1, 33.7, 20.3, 19.3; IR (neat): 2940, 2872, 1591, 1471, 1453, 1083, 1065, 1002, 769, 744  $cm^{-1}$ ; HRMS (ESI) calcd for  $[M+H]^+$   $C_{21}H_{25}O$ : 293.1900, found: 293.1892. The relative stereochemistry of **8b** was assigned by analogy to **2a**. The regiochemistry of **8b** was assigned by process of elimination (it was not **9b**).

(±)-*cis*-8-Methyl-3a-(2-methylbenzyl)-2,3,3a,4,9,9a-hexahydronaphtho[2,3-*b*]furan (**9b**)

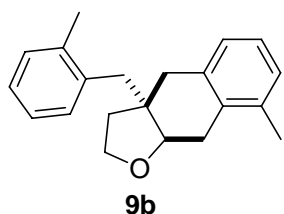

Tetrahydronaphthofuran **9b** was obtained as a clear oil.  $^1\text{H}$  NMR (500 MHz,  $\text{CDCl}_3$ )  $\delta$  7.23 – 7.12 (m, 4H), 7.03 (d,  $J$  = 4.9 Hz, 2H), 6.91 (t,  $J$  = 4.4 Hz, 1H), 4.12 – 4.09 (m, 1H), 3.73 – 3.63 (m, 2H), 3.01 (dd,  $J$  = 3.2, 16.3 Hz, 1H), 2.77 (s, 2H), 2.69 (dd,  $J$  = 4.8, 16.3 Hz, 1H), 2.62 (s, 2H), 2.30 (s, 3H), 2.26 (s, 3H), 1.99 – 1.91 (m, 1H), 1.60 – 1.52 (m, 1H);  $^{13}\text{C}$  NMR (75 MHz,  $\text{CDCl}_3$ )  $\delta$  137.0, 136.8, 136.4, 135.7, 133.5, 131.0, 130.7, 128.0, 126.4, 126.2, 125.6, 125.5, 82.8, 65.9, 46.6, 39.9, 38.1, 37.6, 30.0, 20.4, 19.4; IR (neat): 3019, 2940, 2359, 1471, 1064, 1000, 769, 743  $\text{cm}^{-1}$ ; HRMS (ESI) calcd for  $[\text{M}+\text{H}]^+$   $\text{C}_{21}\text{H}_{25}\text{O}$ : 293.1900, found: 293.1892. The relative stereochemistry of **9b** was assigned by analogy to **2a**. The regiochemistry of **9b** was assigned by NOE.

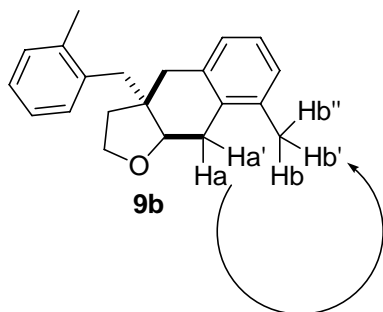

(±)-*trans*-7-Methoxy-2,3,3a,4,9,9a-hexahydronaphtho[2,3-*b*]furan (*trans*-**11a**)

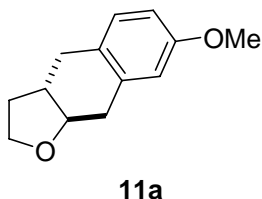

Tetrahydronaphthofurans **11a** and **12a** (78 mg) were obtained from the catalytic carboetherification (Method A, reaction run at 120 °C) of **10a** [78% yield, **11a** : **12a** (3.2 : 1)]. They were separated by prep HPLC using EtOAc/hexanes (**11a** eluted first). Tetrahydronaphthofuran **11a** was obtained as a white solid, mp 89-91 °C;  $^1\text{H}$  NMR (500 MHz,  $\text{CDCl}_3$ )  $\delta$  7.03 (d,  $J$  = 8.4 Hz, 1H), 6.74 – 6.66 (m, 2H), 4.07 – 4.00 (m, 2H), 3.77 (s, 3H), 3.54 – 3.46 (m, 1H), 3.19 (dd,  $J$  = 5.3, 15.2 Hz, 1H), 3.07 (dd,  $J$  = 4.9, 15.7 Hz, 1H), 2.82 (dd,  $J$  = 11.6, 14.8 Hz, 1H), 2.63 – 2.53 (m, 1H), 2.24 – 2.15 (m, 1H), 1.90 – 1.78 (m, 1H), 1.75 – 1.65 (m, 1H);  $^{13}\text{C}$  NMR (75 MHz,  $\text{CDCl}_3$ )  $\delta$  157.8, 136.2, 129.9, 128.2, 114.6, 112.5, 80.3, 67.7, 55.2, 42.5, 36.2, 33.5, 31.1; IR (neat): 2958, 2925, 2875, 2840, 1614, 1570, 1498, 1452, 1304, 1259, 1119, 1071, 1028, 982, 921, 911, 857, 821, 799, 671  $\text{cm}^{-1}$ ; HRMS (ESI) calcd for  $[\text{M}+\text{H}]^+$   $\text{C}_{13}\text{H}_{17}\text{O}_2$ : 205.1223, found: 205.1219. The white solid was recrystallized from  $\text{CH}_2\text{Cl}_2$ /hexanes and the relative stereochemistry of **11a** was assigned by X-ray structure.

X-ray crystal structure of **11a**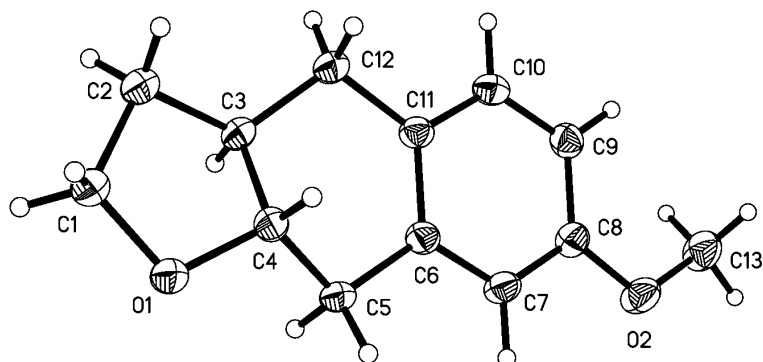 $(\pm)$ -*cis*-7-Methoxy-2,3,3a,4,9,9a-hexahydronaphtho[2,3-*b*]furan (**12a**)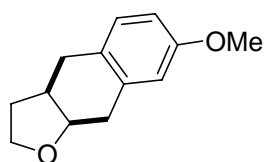**12a**

Tetrahydronaphthofuran **12a** was obtained as a clear oil.  $^1\text{H}$  NMR (500 MHz,  $\text{CDCl}_3$ )  $\delta$  7.02 (d,  $J = 8.1$  Hz, 1H), 6.76 (d,  $J = 2.6$  Hz, 1H), 6.70 (dd,  $J = 2.6, 8.1$  Hz, 1H), 4.29 (dt,  $J = 5.2, 8.7$  Hz, 1H), 3.80 – 3.73 (m, 4H), 3.53 (td,  $J = 6.0, 8.9$  Hz, 1H), 2.84 (dd,  $J = 5.2, 14.8$  Hz, 1H), 2.77 (dd,  $J = 5.2, 14.8$  Hz, 1H), 2.71 (dd,  $J = 5.9, 14.2$  Hz, 1H), 2.63 – 2.54 (m, 1H), 2.48 (dd,  $J = 6.1, 14.2$  Hz, 1H), 2.10 – 2.03 (m, 1H), 1.50 – 1.41 (m, 1H);  $^{13}\text{C}$  NMR (75 MHz,  $\text{CDCl}_3$ )  $\delta$  158.3, 137.7, 129.9, 128.2, 113.9, 111.4, 77.8, 67.2, 55.2, 37.8, 35.2, 32.9, 32.6; IR (neat): 2934, 2360, 2341, 1614, 1584, 1504, 1455, 1362, 1254, 1208, 1153, 1038, 825  $\text{cm}^{-1}$ ; HRMS (ESI) calcd for  $[\text{M}+\text{H}]^+$   $\text{C}_{13}\text{H}_{17}\text{O}_2$ : 205.1223, found: 205.1218. The relative stereochemistry of **12a** was assigned by process of elimination (it was not **11a**).

 $(\pm)$ -*trans*-2,3,3a,4,9,9a-hexahydro-7-(methylthio)naphtho[2,3-*b*]furan (**11b**)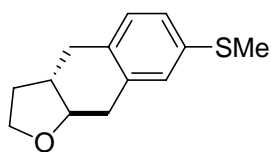**11b**

Tetrahydronaphthofuran **11b** (29 mg) was obtained from the catalytic carboetherification (Method D, reaction run at 140  $^\circ\text{C}$ ) of **10b** (69% yield, trans:cis=4.6:1). Trans **11b** was separated by prep HPLC using EtOAc/hexanes (trans **11b** eluted first) as a white solid, mp 112–114  $^\circ\text{C}$ ;  $^1\text{H}$  NMR (500 MHz,  $\text{CDCl}_3$ )  $\delta$  7.08–7.10 (m, 3H), 4.05 – 4.09 (m, 2H), 3.53 (td,  $J = 10.7, 5.3$  Hz, 1H), 3.23 (dd,  $J = 15.2, 5.3$  Hz, 1H), 3.13 (dd,  $J = 16.1, 4.9$  Hz, 1H), 2.84 (dd,  $J = 15.2, 11.2$  Hz, 1H), 2.64 (dd,  $J = 16.2, 12.2$  Hz, 1H), 2.49 (s, 3H), 2.30–2.20 (m, 1H), 1.90 – 1.80 (m, 1H), 1.78 – 1.69 (m, 1H);  $^{13}\text{C}$  NMR (75 MHz,  $\text{CDCl}_3$ )  $\delta$  135.77, 135.63, 133.33, 129.63, 128.54, 125.03, 80.18, 67.65, 42.25, 35.96, 33.91, 31.12, 16.24; IR (neat): 2948, 2911, 2856, 2830, 1591, 1486, 1440, 1378, 1188, 1071, 1031, 980, 820  $\text{cm}^{-1}$ ; HRMS (EI) calcd for  $[\text{M}]^+$   $\text{C}_{13}\text{H}_{16}\text{OS}$ : 220.0916, found: 220.0919.

(±)-*trans*-2,3,3a,4,9,9a-hexahydro-7-methylnaphtho[2,3-*b*]furan (**11c**)

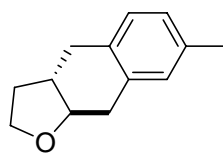

**11c**

Tetrahydronaphthofuran **11c** (20 mg) was obtained from the catalytic carboetherification (Method D, reaction run at 140 °C) of **10c** (56% yield, *trans*:*cis*=4:1). *Trans* and *cis* **11c** were inseparable and were characterized as a mixture of diastereomers; <sup>1</sup>H NMR (500 MHz, CDCl<sub>3</sub>) δ 7.13-6.99 (m, 4H), 4.33-4.30 (m, 0.33H), 4.10 – 4.03 (m, 2H), 3.90-3.49 (m, 2H), 3.19 (dd, *J* = 5.3, 15.2 Hz, 1H), 3.07 (dd, *J* = 4.9, 15.7 Hz, 1H), 2.90-2.75 (m, 2H), 2.67-2.50 (m, 2H), 2.36 – 2.30 (m, 4H), 2.10-1.95 (m, 1H), 1.90-1.85 (m, 1H), 1.75-1.65 (m, 1H); <sup>13</sup>C NMR (75 MHz, CDCl<sub>3</sub>) δ 136.52, 135.70, 135.54, 134.83, 133.04, 130.79, 129.06, 128.61, 127.36, 126.94, 80.44, 78.25, 67.61, 67.19, 42.36, 37.70, 35.95, 34.79, 33.98, 33.12, 33.01, 31.19, 21.42, 20.94; IR (neat): 2924, 2868, 1723, 1615, 1500, 1444, 1380, 1325, 1104, 1073, 1036, 980, 803 cm<sup>-1</sup>; HRMS (EI) calcd for [M]<sup>+</sup> C<sub>13</sub>H<sub>16</sub>O: 188.1196, found: 188.1199.

(±)-*cis*-3a-Phenyl-3,3a,8,8a-tetrahydro-2*H*-indeno[2,1-*b*]furan (**14**)

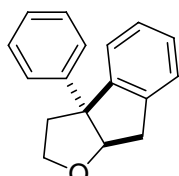

**14**

Tetrahydroindenoindofuran **14** (33 mg) was obtained from the catalytic carboetherification (Method A) of **13** as a clear oil (66% yield). <sup>1</sup>H NMR (500 MHz, CDCl<sub>3</sub>) δ 7.31 – 7.14 (m, 9H), 4.70 (d, *J* = 5.2 Hz, 1H), 4.12 – 4.06 (m, 1H), 3.68 (td, *J* = 6.0, 8.7 Hz, 1H), 3.28 (dd, *J* = 5.3, 17.3 Hz, 1H), 3.09 (d, *J* = 17.3 Hz, 1H), 2.81 – 2.72 (m, 1H), 2.61 – 2.53 (m, 1H); <sup>13</sup>C NMR (75 MHz, CDCl<sub>3</sub>) δ 146.9, 144.6, 142.2, 128.4, 127.5, 127.2, 126.5, 126.3, 125.1, 125.0, 91.3, 68.9, 65.1, 41.3, 39.3; IR (neat): 3021, 2940, 2865, 1598, 1493, 1477, 1456, 1445, 1159, 1066, 756, 719, 699 cm<sup>-1</sup>; HRMS (ESI) calcd for [M+H]<sup>+</sup> C<sub>17</sub>H<sub>17</sub>O: 237.1274, found: 237.1272. The relative stereochemistry of **14** was assigned by NOE.

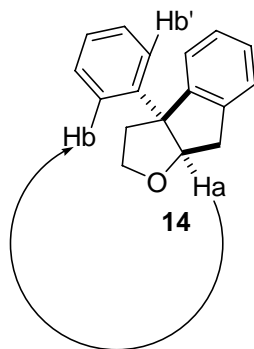

(±)-*trans*-(3a-Benzyl-2-phenyl-2,3,3a,4,9,9a-hexahydronaphtho[2,3-*b*]furan (**16a**)

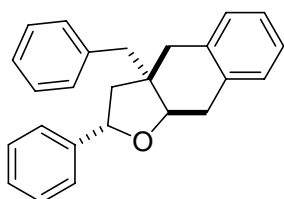

**16a**

Tetrahydronaphthofurans **16a** and **17a** (49 mg) were obtained from the catalytic carboetherification (Method A) of **15a** [98% yield, **16a** : **17a** (2.6 : 1)]. They were separated by prep HPLC using EtOAc/hexanes (**16a** eluted first). Tetrahydronaphthofuran **16a** was obtained as a white solid, mp 84-86 °C; <sup>1</sup>H NMR (500 MHz, CDCl<sub>3</sub>) δ 7.35 – 7.18 (m, 11H), 7.15 – 7.09 (m, 3H), 4.74 (dd, *J* = 6.0, 9.0 Hz, 1H), 4.44 (t, *J* = 5.0 Hz, 1H), 3.00 (qd, *J* = 5.0, 15.5 Hz, 2H),



2.71 – 2.62 (m, 4H), 2.16 (dd,  $J = 9.1, 12.5$  Hz, 1H), 2.02 (dd,  $J = 6.0, 12.5$  Hz, 1H);  $^{13}\text{C}$  NMR (75 MHz,  $\text{CDCl}_3$ )  $\delta$  142.9, 138.4, 137.0, 135.6, 130.2, 128.3, 128.3, 128.1, 128.0, 127.2, 126.5, 126.4, 126.3, 125.5, 83.9, 79.6, 48.3, 48.1, 45.4, 37.6, 34.7; IR (neat): 3061, 3026, 2932, 2360, 1721, 1602, 1493, 1452, 1051, 753, 701  $\text{cm}^{-1}$ ; HRMS (ESI) calcd for  $[\text{M}+\text{Na}]^+$   $\text{C}_{25}\text{H}_{24}\text{ONa}$ : 363.1719, found: 363.1714. The relative stereochemistry of **16a** was assigned by NOE and by process of elimination (it was not **17a**). When (*R,R*)-Ph-Box and Method B were used, **16a** was obtained as a white solid:  $[\alpha]_{\text{D}}^{17} = -2.78^\circ$  ( $c$  0.90,  $\text{CHCl}_3$ ). ee = 30%, determined by HPLC analysis [(*S,S*)-Whelk, 2% IPA/Hexane, 1.0 mL/min,  $\lambda = 254$  nm,  $t(\text{major}) = 5.51$  min,  $t(\text{minor}) = 6.33$  min]

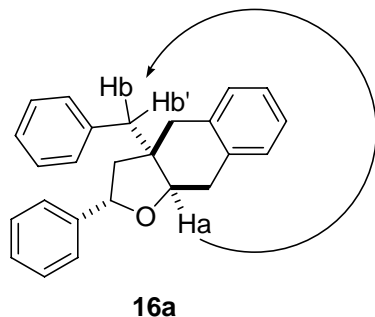

**(±)-cis-(3a-Benzyl-2-phenyl-2,3,3a,4,9,9a-hexahydronaphtho[2,3-*b*]furan (17a)**

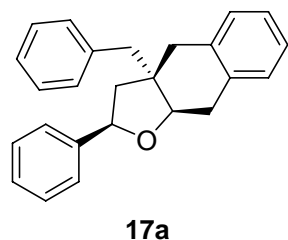

Tetrahydronaphthofuran **17a** was obtained as a clear oil.  $^1\text{H}$  NMR (500 MHz,  $\text{CDCl}_3$ )  $\delta$  7.38 – 7.11 (m, 11H), 7.06 (d,  $J = 7.2$ , 1H), 6.88 (dd,  $J = 2.8, 6.7$  Hz, 2H), 4.64 (dd,  $J = 5.2, 10.9$  Hz, 1H), 4.38 (t,  $J = 3.8$  Hz, 1H), 2.99 (dd,  $J = 3.4, 15.0$  Hz, 1H), 2.89 (ABq,  $J_{\text{AB}} = 13.5$ ,  $\Delta\nu = 42.7$  Hz, 2H), 2.72 (dd,  $J = 4.1, 15.0$  Hz, 1H), 2.58 (ABq,  $J_{\text{AB}} = 14.0$ ,  $\Delta\nu = 85.9$  Hz, 2H), 2.25 (dd,  $J = 5.2, 12.8$  Hz, 1H), 1.39 – 1.31 (m, 1H);  $^{13}\text{C}$  NMR (75 MHz,  $\text{CDCl}_3$ )  $\delta$  141.4, 138.0, 137.0, 136.5, 130.7, 128.3, 128.2, 128.1, 127.4, 126.5, 126.5, 126.3, 126.0, 84.1, 78.6, 48.1, 46.2, 45.9, 39.1, 35.0; IR (neat): 3342, 3026, 2913, 1492, 1452, 1068, 1027, 755, 701  $\text{cm}^{-1}$ ; HRMS (ESI) calcd for  $[\text{M}+\text{Na}]^+$   $\text{C}_{25}\text{H}_{24}\text{ONa}$ : 363.1719, found: 363.1711. The relative stereochemistry of **17a** was assigned by NOE. When (*R,R*)-Ph-Box and Method B were used, **17a** was obtained as a colorless oil:  $[\alpha]_{\text{D}}^{17} = -22.40^\circ$  ( $c$  0.50,  $\text{CHCl}_3$ ). ee = 67%, determined by HPLC analysis [(*S,S*)-Whelk, 2% IPA/Hexane, 1.0 mL/min,  $\lambda = 254$  nm,  $t(\text{major}) = 5.81$  min,  $t(\text{minor}) = 5.27$  min]

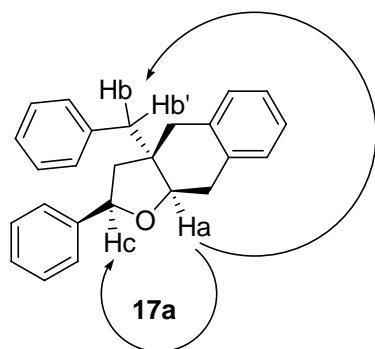

(±)-*trans*-2-Allyl-3a-benzyl-2,3,3a,4,9,9a-hexahydronaphtho[2,3-*b*]furan (**16b**)

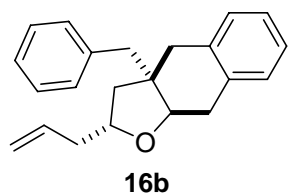

Tetrahydronaphthofurans **16b** and **17b** (49 mg) were obtained from the catalytic carboetherification (Method A) of **15b** [98% yield, **16b** : **17b** (2.5 : 1)]. They were separated by prep HPLC using EtOAc/hexanes (**16b** eluted first). Tetrahydronaphthofuran **16b** was obtained as a clear oil. <sup>1</sup>H NMR (500 MHz, CDCl<sub>3</sub>) δ 7.34 – 7.13 (m, 8H), 7.10 – 7.04 (m, 1H), 5.79 – 5.68 (m, 1H), 5.09 – 5.00 (m, 2H), 4.20 (t, *J* = 5.2 Hz, 1H), 3.81 – 3.72 (m, 1H), 2.91 (d, *J* = 5.2 Hz, 2H), 2.69 – 2.50 (m, 4H), 2.36 – 2.27 (m, 1H), 2.24 – 2.16 (m, 1H), 1.85 (dd, *J* = 9.5, 12.4 Hz, 1H), 1.69 (dd, *J* = 5.6, 12.4 Hz, 1H); <sup>13</sup>C NMR (75 MHz, CDCl<sub>3</sub>) δ 138.6, 137.1, 135.6, 134.7, 130.2, 128.1, 128.1, 127.9, 126.4, 126.3, 126.2, 116.8, 83.0, 77.3, 47.8, 45.4, 44.8, 40.0, 37.5, 34.5; IR (neat): 3065, 3026, 2920, 2360, 2339, 1641, 1603, 1493, 1453, 1073, 997, 914, 753, 703 cm<sup>-1</sup>; HRMS (ESI) calcd for [M+H]<sup>+</sup> C<sub>22</sub>H<sub>25</sub>O: 305.1900, found: 305.1897. The relative stereochemistry of **16b** was assigned by NOE and by process of elimination (it was not **17b**).

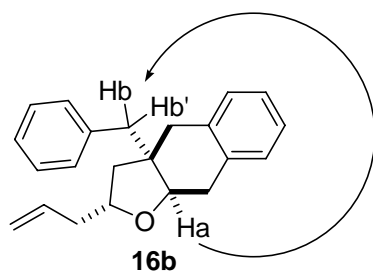

(±)-*cis*-2-Allyl-3a-benzyl-2,3,3a,4,9,9a-hexahydronaphtho[2,3-*b*]furan (**17b**)

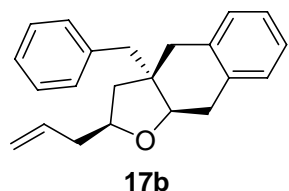

Tetrahydronaphthofuran **17b** was obtained as a clear oil. <sup>1</sup>H NMR (500 MHz, CDCl<sub>3</sub>) δ 7.36 – 7.12 (m, 8H), 7.08 – 7.02 (m, 1H), 5.62 – 5.51 (m, 1H), 4.97 – 4.89 (m, 2H), 4.15 (t, *J* = 4.3 Hz, 1H), 3.84 – 3.76 (m, 1H), 2.84 (dd, *J* = 4.0, 15.0 Hz, 1H), 2.78 (d, *J* = 13.3 Hz, 1H), 2.73 – 2.66 (m, 2H), 2.53 (ABq, *J*<sub>AB</sub> = 14.0, Δ*v* = 89.6 Hz, 2H), 2.19 – 2.10 (m, 1H), 2.06 – 1.94 (m, 1H), 1.08 – 1.01 (m, 1H); <sup>13</sup>C NMR (75 MHz, CDCl<sub>3</sub>) δ 138.2, 137.1, 136.3, 134.5, 130.7, 128.2, 128.1, 128.0, 126.4, 126.3, 126.1, 116.6, 84.0, 76.0, 47.5, 45.7, 42.0, 39.0, 38.9, 35.0; IR (neat): 3025, 2917, 2360, 1492, 1453, 1076, 913, 752, 703 cm<sup>-1</sup>; HRMS (ESI) calcd for [M+H]<sup>+</sup> C<sub>22</sub>H<sub>25</sub>O: 305.1900, found: 305.1895. The relative stereochemistry of **17b** was assigned by NOE.

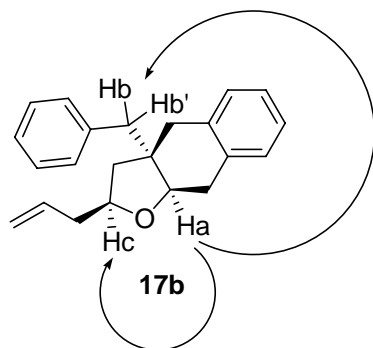

**(±)-*trans*-3a-(4-Chlorobenzyl)-7-chloro-2,3,3a,4,9,9a-hexahydro-2-phenylnaphtho[2,3-b]furan (16c)**

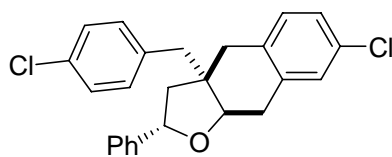

**16c**

Tetrahydronaphthofurans **16c** and **17c** (23 mg) were obtained from the catalytic carboetherification (Method A) of **15c** [77% yield, **16c** : **17c** (2.3 : 1)]. They were separated by prep TLC using 10% EtOAc/hexanes. Tetrahydronaphthofuran **16c** was obtained as a white solid, mp 94-96 °C; <sup>1</sup>H NMR (300 MHz, CDCl<sub>3</sub>) δ 7.37 – 7.15 (m, 9H), 7.06 – 7.00 (m, 3H), 4.77 (dd, *J* = 8.7, 6.3 Hz, 1H), 4.41 (t, *J* = 4.9 Hz, 1H), 2.97 (qd, *J* = 15.7, 4.8 Hz, 2H), 2.62-2.59 (m, 4H), 2.07 (qd, *J* = 12.5, 7.5 Hz, 2H); <sup>13</sup>C NMR (75 MHz, CDCl<sub>3</sub>) δ 142.63, 137.43, 136.54, 135.17, 132.46, 132.11, 131.38, 129.12, 128.44, 128.36, 128.33, 127.34, 126.48, 125.38, 82.23, 79.51, 48.14, 47.81, 44.47, 36.84, 34.42; IR (neat): 2912, 2820, 1481, 1085, 1048, 1011, 754 cm<sup>-1</sup>; HRMS (ESI) calcd for [M]<sup>+</sup> C<sub>25</sub>H<sub>22</sub>Cl<sub>2</sub>O: 408.1042, found: 408.1050. When (*R,R*)-Ph-Box and Method B were used, **16c** was obtained as a white solid: [α]<sub>D</sub><sup>17</sup> = -2.33 ° (*c* 0.25, CHCl<sub>3</sub>). ee = 32%, determined by HPLC analysis [(*S,S*)-Whelk, 2% IPA/Hexane, 1.0 mL/min, λ = 254 nm, t(major) = 6.31 min, t(minor) = 7.17 min]

**(±)-*cis*-3a-(4-Chlorobenzyl)-7-chloro-2,3,3a,4,9,9a-hexahydro-2-phenylnaphtho[2,3-b]furan (17c)**

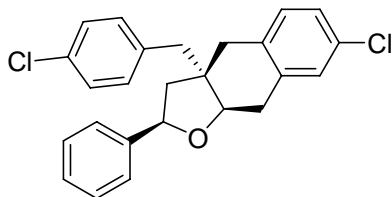

**17c**

Tetrahydronaphthofuran **17c** was obtained as a clear oil. <sup>1</sup>H NMR (300 MHz, CDCl<sub>3</sub>) δ 7.32 (d, *J* = 8.4, 2H), 7.26-7.15 (m, 7H), 6.98 (d, *J* = 7.9, 1H), 6.91 (dd, *J* = 6.6, 2.7 Hz, 2H), 4.65 (dd, *J* = 10.8, 5.1 Hz, 1H), 4.33 (t, *J* = 3.7 Hz, 1H), 2.98 (dd, *J* = 15.2, 3.3 Hz, 1H), 2.86 (ABq, *J*<sub>AB</sub> = 13.5, Δ*v* = 42.7 Hz, 2H), 2.68 (dd, *J* = 15.0, 4.1 Hz, 1H), 2.51 (ABq, *J*<sub>AB</sub> = 14.0, Δ*v* = 85.9 Hz, 2H), 2.22 (dd, *J* = 12.8, 5.2 Hz, 1H), 1.38 – 1.30 (m, 1H); <sup>13</sup>C NMR (75 MHz, CDCl<sub>3</sub>) δ 140.88, 138.27, 136.23, 135.12, 132.62, 132.15, 131.86, 129.33, 128.44, 128.28, 127.63, 126.37, 125.89, 83.52, 78.55, 47.88, 46.06, 45.03, 38.43, 34.78; IR (neat): 3023, 2914, 2859, 1491, 1446, 1081, 1053, 1017, 826 cm<sup>-1</sup>; HRMS (ESI) calcd for [M]<sup>+</sup> C<sub>25</sub>H<sub>22</sub>Cl<sub>2</sub>O: 408.1042, found: 408.1053. When (*R,R*)-Ph-Box and Method B were used, **17c** was obtained as a colorless oil: [α]<sub>D</sub><sup>17</sup> = -18.52 ° (*c* 0.80, CHCl<sub>3</sub>). ee = 60%, determined by HPLC analysis [(*S,S*)-Whelk, 2% IPA/Hexane, 0.8 mL/min, λ = 254 nm, t(major) = 9.13 min, t(minor) = 8.56 min]

**(±)-*cis*-3a-Benzyl-2,3,3a,4,9,9a-hexahydro-2,2-diphenylnaphtho[2,3-b]furan (16d) and (-)-16d**

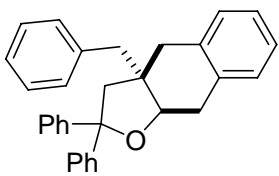

**16d**

Tetrahydronaphthofuran **16d** (70 mg) was obtained from the catalytic carboetherification (Method A) of **15d** as a clear oil (89% yield). <sup>1</sup>H NMR (500 MHz, CDCl<sub>3</sub>) δ 7.67 – 7.65 (m, 2H), 7.49 (t, *J* = 7.5 Hz, 2H), 7.41-7.22 (m, 7H), 7.11 (d, *J* = 7.3 Hz, 3H), 7.04 (dt, *J* = 9.1, 2.8 Hz, 3H), 6.74 – 6.70 (m, 2H), 4.41 (d, *J* = 3.5 Hz, 1H), 3.15 (dd, *J* = 15.0, 3.2 Hz, 1H), 2.99 (d, *J* = 13.2 Hz, 1H), 2.75 (dd, *J* = 15.1, 3.7 Hz, 1H), 2.64 (d, *J* = 14.1 Hz, 1H), 2.48 (dd, *J* = 13.8, 4.5 Hz, 2H), 2.40 (d, *J* = 13.3 Hz, 1H), 2.04 (d, *J* = 13.2 Hz, 1H); <sup>13</sup>C NMR (75 MHz, CDCl<sub>3</sub>) δ 146.43, 144.56, 138.35,

136.92, 136.77, 130.43, 128.43, 128.38, 128.32, 128.01, 127.71, 127.01, 126.80, 126.60, 126.55, 126.30, 126.06, 86.56, 83.11, 51.22, 48.53, 44.85, 39.15, 34.58; IR (neat): 3059, 3024, 2914, 2850, 1597, 1491, 1447, 1043, 757, 702  $\text{cm}^{-1}$ ; HRMS (EI) calcd for  $[\text{M}]^+$   $\text{C}_{31}\text{H}_{28}\text{O}$ : 416.2135, found: 416.2130. When (*R,R*)-Ph-Box and Method B were used, (-)-**16d** was obtained as a colorless oil:  $[\alpha]_{\text{D}}^{17} = -71.81^\circ$  (*c* 0.45,  $\text{CHCl}_3$ ). ee = 75%, determined by HPLC analysis [Chiralpak AD-RH, 60:40  $\text{CH}_3\text{CN}/\text{H}_2\text{O}$ , 0.75 mL/min,  $\lambda = 254$  nm,  $t(\text{major}) = 26.71$  min,  $t(\text{minor}) = 25.15$  min]

(±)-*cis*-3a-(4-Chlorobenzyl)-7-chloro-2,3,3a,4,9,9a-hexahydro-2,2-diphenylnaphtho[2,3-b]furan (**16e**) and (-)-**16e**

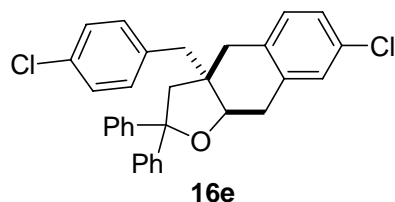

Tetrahydronaphthofuran **16e** (30 mg) was obtained from the catalytic carboetherification (Method A) of **15e** as a white solid (85% yield), mp 116-118  $^\circ\text{C}$ .  $^1\text{H}$  NMR (500 MHz,  $\text{CDCl}_3$ )  $\delta$  7.59 (dd,  $J = 8.2, 1.2$  Hz, 2H), 7.44 (t,  $J = 7.8$  Hz, 2H), 7.34-7.26 (m, 2 H), 7.26-7.21 (m, 2 H), 7.18 (dd,  $J = 7.9, 2.1$  Hz, 1H), 7.07-7.04 (m, 3H), 6.98 (dd,  $J = 8.0, 5.2$  Hz, 3H), 6.75-6.73 (m, 2 H), 4.34 (t,  $J = 3.6$  Hz, 1H), 3.09 (dd,  $J = 15.2, 3.3$  Hz, 1H), 2.90 (d,  $J = 13.2$  Hz, 1H), 2.67 (dd,  $J = 15.2, 3.8$  Hz, 1H), 2.46 (ABq,  $J_{\text{AB}} = 15.0, \Delta\nu = 29.6$  Hz, 2H), 2.37 (ABq,  $J_{\text{AB}} = 15.0, \Delta\nu = 29.6$  Hz, 2H), 1.98 (d,  $J = 13.2$  Hz, 1H);  $^{13}\text{C}$  NMR (75 MHz,  $\text{CDCl}_3$ )  $\delta$  146.09, 144.44, 138.55, 136.52, 135.06, 132.39, 132.20, 131.60, 129.50, 128.51, 128.46, 128.26, 127.87, 127.15, 126.79, 126.56, 126.36, 125.86, 86.58, 82.44, 50.94, 48.33, 44.02, 38.48, 34.37; IR (neat): 2950, 2943, 2841, 1482, 1446, 1081, 1044, 817, 689  $\text{cm}^{-1}$ ; HRMS (ESI) calcd for  $[\text{M}]^+$   $\text{C}_{31}\text{H}_{26}\text{Cl}_2\text{O}$ : 484.1355, found: 484.1328. When (*R,R*)-Ph-Box and Method B were used, (-)-**16e** was obtained as a white solid:  $[\alpha]_{\text{D}}^{17} = -66.70^\circ$  (*c* 1.35,  $\text{CHCl}_3$ ). ee could not be determined by either Chiral HPLC or GC. The relative stereochemistry was confirmed by X-ray crystal structure of the racemate.

X-ray crystal structure of **16e**

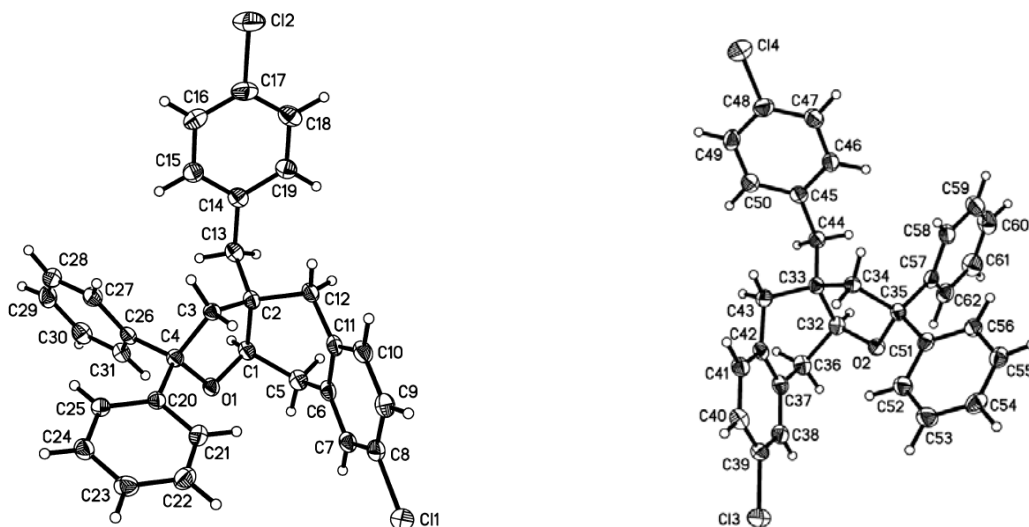

(±)-*cis*-1-Phenyl-1,2,4,5-tetrahydro-1,4-methanobenzo[*d*]oxepine (**19a**)

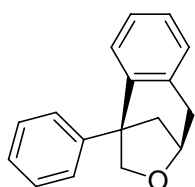

**19a**

Tetrahydrofuran **19a** (42 mg) was obtained from the catalytic carboetherification (Method A, reaction run at 120 °C) of **18a** as a white solid (93% yield), mp 139-140 °C. <sup>1</sup>H NMR (300 MHz, CDCl<sub>3</sub>) δ 7.50-7.32 (m, 3H), 7.31-7.20 (m, 2H), 7.19-7.13 (m, 2H), 7.00-6.93 (m, 1H), 6.51 (d, *J* = 7.7 Hz, 1H), 4.89-4.77 (m, 1H), 4.40 (d, *J* = 7.0 Hz, 1H), 4.28 (d, *J* = 7.0 Hz, 1H), 3.14 (s, 2H), 2.57 (d, *J* = 11.0 Hz, 1H), 2.39 (dd, *J* = 11.0, 6.3 Hz, 1H); <sup>13</sup>C NMR (75 MHz, CDCl<sub>3</sub>) δ 145.29, 142.20, 133.44, 129.51, 128.16, 126.96, 126.68, 125.89, 125.61, 81.07, 75.43, 51.81, 40.24, 39.41; IR (neat): 3057, 3029, 2928, 2860, 1600, 1485, 1449, 1306, 1076, 1040, 975, 961, 754, 701 cm<sup>-1</sup>; HRMS (EI) calcd for [M]<sup>+</sup> C<sub>17</sub>H<sub>16</sub>O: 236.1196, found: 236.1201.

(±)-*cis*-7-Methoxy-1-(4-methoxyphenyl)-1,2,4,5-tetrahydro-1,4-methanobenzo[*d*]oxepine (**19b**)

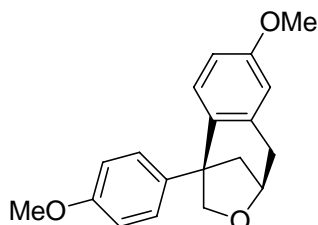

**19b**

Tetrahydrofuran **19b** (51 mg) was obtained from the catalytic carboetherification (Method A, reaction run at 120 °C) of **18b** as a white solid (91% yield), mp 117-118 °C. <sup>1</sup>H NMR (300 MHz, CDCl<sub>3</sub>) δ 7.16 (d, *J* = 8.5 Hz, 2H), 7.02-6.90 (m, 2H), 6.70 (d, *J* = 2.6 Hz, 1H), 6.58-6.40 (m, 2H), 4.86-4.76 (m, 1H), 4.32 (dd, *J* = 6.8, 0.9 Hz, 1H), 4.22 (d, *J* = 6.9 Hz, 1H), 3.85 (s, 3H), 3.75 (s, 3H), 3.10 (d, *J* = 2.0 Hz, 2H), 2.49 (d, *J* = 10.9 Hz, 1H), 2.33 (dd, *J* = 10.9, 6.3 Hz, 1H); <sup>13</sup>C NMR (75 MHz, CDCl<sub>3</sub>) δ 158.38, 158.23, 138.08, 134.75, 134.45, 129.02, 126.98, 114.43, 111.14, 81.29, 75.43, 55.26, 55.16, 50.55, 40.74, 39.70; IR (neat): 2935, 2866, 2839, 1611, 1574, 1515, 1494, 1464, 1311, 1248, 1182, 1116, 1074, 1039, 978, 826, 803 cm<sup>-1</sup>; HRMS (ESI) calcd for [M + H]<sup>+</sup> C<sub>19</sub>H<sub>20</sub>O<sub>3</sub>: 297.1485, found: 297.1135.

(±)-*cis*-7-(Methylthio)-1-(4-(methylthio)phenyl)-1,2,4,5-tetrahydro-1,4-methanobenzo[*d*]oxepine (**19c**)

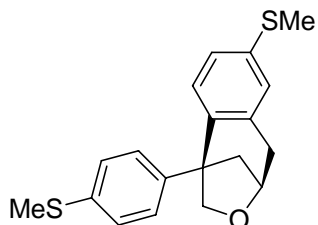

**19c**

Tetrahydrofuran **19c** (40 mg) was obtained from the catalytic carboetherification (Method A, reaction run at 120 °C) of **18c** as a white solid (87% yield), mp 125-126 °C. <sup>1</sup>H NMR (300 MHz, CDCl<sub>3</sub>) δ 7.32-7.26 (m, 2H), 7.14 (d, *J* = 8.4 Hz, 2H), 7.04 (d, *J* = 1.9 Hz, 1H), 6.86 (dd, *J* = 8.2, 2.1 Hz, 1H), 6.43 (d, *J* = 8.2 Hz, 1H), 4.85-4.756 (m, 1H), 4.32 (dd, *J* = 7.0, 0.9 Hz, 1H), 4.21 (d, *J* = 7.0 Hz, 1H), 3.08 (s, 2H), 2.52 (s, 3H), 2.49 (d, *J* = 10.9 Hz, 1H), 2.42 (s, 3H), 2.34 (dd, *J* = 10.8, 6.1 Hz, 1H); <sup>13</sup>C NMR (75 MHz, CDCl<sub>3</sub>) δ 142.35, 138.74, 137.12, 136.56, 134.18, 128.51, 127.69, 126.40, 124.10, 80.91, 75.31, 51.11, 40.30, 39.30, 15.94, 15.81; IR (neat): 2920, 2848, 1595, 1550, 1496, 1483, 1437, 1305, 1183, 1096, 1064, 1038, 964, 904 cm<sup>-1</sup>; HRMS (EI) calcd for [M]<sup>+</sup> C<sub>19</sub>H<sub>20</sub>OS<sub>2</sub>: 328.0950, found: 328.0953.

(±)-*cis*-7-Chloro-1-(4-chlorophenyl)-1,2,4,5-tetrahydro-1,4-methanobenzo[*d*]oxepine (**19d**)

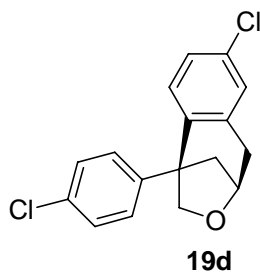

**19d**

Tetrahydrofuran **19d** (54 mg) was obtained from the catalytic carboetherification (Method A, reaction run at 120 °C) of **18d** as a pale yellow oil (93% yield). <sup>1</sup>H NMR (300 MHz, CDCl<sub>3</sub>) δ 7.40-7.39 (m, 2H), 7.18-7.12 (m, 3H), 6.92 (dd, *J* = 8.4, 2.3 Hz, 1H), 6.39 (d, *J* = 8.4 Hz, 1H), 4.85-4.75 (m, 1H), 4.31 (dd, *J* = 7.1, 0.9 Hz, 1H), 4.20 (d, *J* = 7.1 Hz, 1H), 3.08 (s, 2H), 2.47 (d, *J* = 11.0 Hz, 1H), 2.33 (dd, *J* = 10.8, 6.6 Hz, 1H); <sup>13</sup>C NMR (75 MHz, CDCl<sub>3</sub>) δ 143.25, 140.13, 135.47, 133.08, 132.51, 129.38, 127.18, 125.80, 80.74, 75.05, 51.12, 40.20, 39.21; IR (neat): 2932, 2859, 1587, 1495, 1474, 1397, 1094, 822 cm<sup>-1</sup>; HRMS (EI) calcd for [M]<sup>+</sup> C<sub>17</sub>H<sub>14</sub>OCl<sub>2</sub>: 304.0416, found: 304.0421.

(±)-*cis*-7-Fluoro-1-(4-fluorophenyl)-1,2,4,5-tetrahydro-1,4-methanobenzo[*d*]oxepine (**19e**)

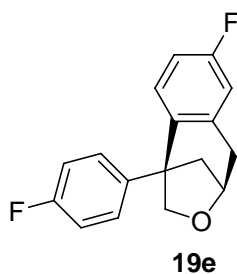

**19e**

Tetrahydrofuran **19e** (48 mg) was obtained from the catalytic carboetherification (Method A, reaction run at 120 °C) of **18e** as a white solid (92% yield), mp 118-119 °C. <sup>1</sup>H NMR (300 MHz, CDCl<sub>3</sub>) δ 7.23-7.04 (m, 4H), 6.84 (dd, *J* = 9.3, 2.7 Hz, 1H), 6.64 (td, *J* = 8.5, 2.8 Hz, 1H), 6.42 (dd, *J* = 8.7, 5.7 Hz, 1H), 4.85-4.75 (m, 1H), 4.31 (dd, *J* = 7.0, 0.9 Hz, 1H), 4.21 (d, *J* = 7.0 Hz, 1H), 3.10 (s, 2H), 2.48 (d, *J* = 11.1 Hz, 1H), 2.34 (dd, *J* = 10.8, 6.1 Hz, 1H); <sup>13</sup>C NMR (75 MHz, CDCl<sub>3</sub>) δ 163.40, 163.19, 160.14, 159.94, 137.74, 137.70, 135.81, 135.71, 129.58, 129.47, 127.43, 127.33, 116.07, 115.79, 112.53, 112.26, 81.05, 75.08, 50.87, 40.53, 39.54, 39.52; IR (neat): 2932, 2857, 1609, 1589, 1509, 1490, 1419, 1305, 1239, 1163, 1108, 1071, 1040, 970, 829 cm<sup>-1</sup>; HRMS (EI) calcd for [M]<sup>+</sup> C<sub>17</sub>H<sub>14</sub>OF<sub>2</sub>: 272.1007, found: 272.1011.

(±)-*cis*-5-Phenyl-6,7,8,9-tetrahydro-5H-5,8-epoxybenzo[7]annulene (**21**) and (-)-**21**

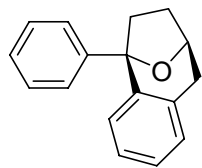

**21**

Tetrahydrofuran **21** (20 mg) was obtained from the catalytic carboetherification (Method A, reaction run at 120 °C) of **20** as a white solid (67% yield), mp 114-116 °C. <sup>1</sup>H NMR (300 MHz, CDCl<sub>3</sub>) δ 7.54-7.49 (m, 2H), 7.40-7.32 (m, 3H), 7.11 (dd, *J* = 4.6, 2.1 Hz, 2H), 6.96 (dd, *J* = 8.0, 2.9 Hz, 1H), 6.58 (d, *J* = 7.6 Hz, 1H), 4.91 (t, *J* = 6.4 Hz, 1H), 3.53 (dd, *J* = 16.4, 5.1 Hz, 1H), 2.63 (d, *J* = 16.4 Hz, 1H), 2.54-2.49 (m, 1H), 2.44-2.35 (m, 2H), 1.91-1.83 (m, 1H); <sup>13</sup>C NMR (75 MHz, CDCl<sub>3</sub>) δ 143.75, 142.70, 131.87, 130.05, 129.21, 128.09, 127.48, 126.71, 125.66, 124.96, 85.45, 74.40, 40.91, 37.19, 29.58; IR (neat): 3041, 2949, 1444, 1306, 1057, 1011, 763, 708 cm<sup>-1</sup>; HRMS (ESI) calcd for [M + Na]<sup>+</sup> C<sub>17</sub>H<sub>16</sub>O: 259.1093, found: 259.1095. When (*R,R*)-Ph-Box and Method B were used, (-)-**21** was obtained as a white solid: [α]<sub>D</sub><sup>17</sup> = -2.74 ° (*c* 0.30, CHCl<sub>3</sub>). ee = 50%, determined by HPLC analysis [(*S,S*)-Whelk, 2% IPA/Hexane, 0.8 mL/min, λ = 254 nm, t(major) = 6.09 min, t(minor) = 6.65 min]. The absolute stereochemistry of (-)-**21** was tentatively assigned by analogy to similar literature compounds: (+)-

Bruguierol A and (+)-Bruguierol C, having  $[\alpha]_D^{25}$  of +14.5 ° (*c* 0.007, CHCl<sub>3</sub>) and +4.2 ° (*c* 0.005, MeOH) respectively.<sup>12-13</sup>

**(±)-*cis*-4-Methyl-1-phenyl-1,2,4,5-tetrahydro-1,4-methanobenzo[*d*]oxepine (23)**

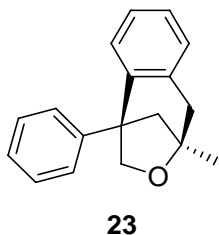

Tetrahydrofuran **23** (41 mg) was obtained from the catalytic carboetherification (Method A, reaction run at 120 °C) of **22** as a white solid (87% yield), mp 143-145 °C. <sup>1</sup>H NMR (500 MHz, CDCl<sub>3</sub>) δ 7.41 (t, *J* = 7.7 Hz, 2H), 7.37-7.31 (m, 1H), 7.26-7.21 (m, 2H), 7.16-7.11 (m, 2H), 7.00-6.95 (m, 1H), 6.52 (d, *J* = 7.9 Hz, 1H), 4.35 (dd, *J* = 17.5, 6.9 Hz, 2H), 3.15-3.08 (m, 2H), 2.57 (d, *J* = 11.0 Hz, 1H), 2.21 (d, *J* = 11.0, 1H), 1.56 (s, 3H); <sup>13</sup>C NMR (75 MHz, CDCl<sub>3</sub>) δ 145.00, 142.42, 134.59, 129.17, 128.50, 128.01, 126.94, 126.56, 125.83, 125.58, 81.03, 80.79, 53.73, 46.43, 45.14, 25.93; IR (neat): 3059, 3028, 2965, 2923, 2860, 1600, 1485, 1448, 1376, 1302, 1222, 1157, 1094, 1042, 977, 769, 758, 729, 700 cm<sup>-1</sup>; HRMS (EI) calcd for [M]<sup>+</sup> C<sub>18</sub>H<sub>18</sub>O: 250.1352, found: 250.1337.

**(±)-*cis*-5-Methyl-1-phenyl-1,2,4,5-tetrahydro-1,4-methanobenzo[*d*]oxepine (25a)**

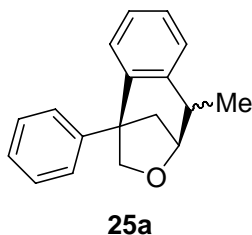

Tetrahydrofuran **25a** (38 mg) was obtained from the catalytic carboetherification (Method A, reaction run at 120 °C) of **24a** as a colorless oil (81% yield, 1:1 diastereomer). <sup>1</sup>H NMR (500 MHz, CDCl<sub>3</sub>) δ 7.95-7.15 (m, 7H), 6.98 (t, *J* = 7.6 Hz, 1H), 6.51 (ddd, *J* = 7.8, 5.3, 1.3 Hz, 1H), 4.54 (dd, *J* = 6.3, 2.6 Hz, 1H), 4.38-4.25 (m, 2H), 3.21-3.16 (m, 1H), 2.69-2.60 (m, 1H), 2.44 (dd, *J* = 10.9, 6.3 Hz, 0.5H), 2.24 (ddd, *J* = 11.2, 6.4, 0.7, 0.5H), 1.49 (d, *J* = 7.1 Hz, 1.5H), 1.35 (d, *J* = 7.3 Hz, 1.5H); <sup>13</sup>C NMR (75 MHz, CDCl<sub>3</sub>) δ 145.13, 144.69, 142.49, 142.16, 139.01, 132.42, 130.07, 129.46, 128.25, 128.21, 128.18, 126.98, 126.94, 126.82, 125.75, 125.61, 80.63, 80.30, 80.04, 79.90, 52.23, 51.91, 42.10, 41.48, 36.17, 20.35, 18.41; IR (neat): 3028, 2951, 2912, 2848, 1649, 1488, 1442, 1274, 1035, 757, 693 cm<sup>-1</sup>; HRMS (EI) calcd for [M]<sup>+</sup> C<sub>18</sub>H<sub>18</sub>O: 250.1352, found: 250.1361.

**(±)-*trans*-9-Deutero-7-methoxy-2,3,3a,4,9,9a-hexahydronaphtho[2,3-*b*]furan (11a-D)**

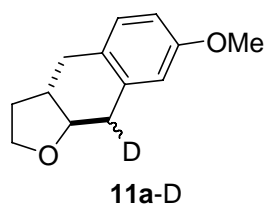

Tetrahydronaphthofurans **11a-D** and **12a-D** (50 mg) were obtained from catalytic carboetherification (Method A) of **10a-D** [75% yield, **11a-D** : **12a-D** (1.8 : 1)]. They were separated by prep HPLC using EtOAc/hexanes (**11-D** eluted first). Tetrahydronaphthofuran **11a-D** was obtained as a white solid, mp 92-94 °C; <sup>1</sup>H NMR (500 MHz, CDCl<sub>3</sub>) δ 7.03 (d, *J* = 8.4 Hz, 1H), 6.72 (dd, *J* = 2.7, 8.4 Hz, 1H), 6.68 (d, *J* = 2.6 Hz, 1H), 4.04 (dd, *J* = 5.2, 9.2 Hz, 2H), 3.78 (s, 3H), 3.53 – 3.45 (m, 1H), 3.17 (s, 0.5H), 3.08 (dd, *J* = 4.9, 15.7 Hz, 1H), 2.80 (d, *J* = 11.1 Hz, 0.5H), 2.58 (dd, *J* = 12.2, 15.6 Hz, 1H), 2.24 – 2.15 (m, 1H), 1.90 – 1.78 (m, 1H), 1.75 – 1.64 (m, 1H); <sup>13</sup>C NMR (75 MHz, CDCl<sub>3</sub>) δ 157.8, 136.1, 129.9, 128.2, 128.2, 114.6, 114.6, 112.5, 80.3, 80.2, 67.7, 55.2, 42.5, 35.9 (m),

33.5, 31.1; IR (neat): 2925, 2360, 1615, 1572, 1498, 1454, 1289, 1255, 1071, 1026, 814  $\text{cm}^{-1}$ ; HRMS (ESI) calcd for  $[\text{M}+\text{H}]^+$   $\text{C}_{13}\text{H}_{16}\text{DO}_2$ : 206.1286, found: 206.1276.

**(±)-*cis*-9-Deutero-7-methoxy-2,3,3a,4,9,9a-hexahydronaphtho[2,3-*b*]furan (12a-D)**

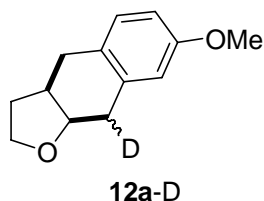

Tetrahydronaphthofuran **12a-D** was obtained as a clear oil.  $^1\text{H}$  NMR (500 MHz,  $\text{CDCl}_3$ )  $\delta$  7.02 (d,  $J = 8.1$  Hz, 1H), 6.76 (d,  $J = 2.6$  Hz, 1H), 6.70 (dd,  $J = 2.7, 8.1$  Hz, 1H), 4.31 – 4.25 (m, 1H), 3.81 – 3.73 (m, 4H), 3.57 – 3.49 (m, 1H), 2.82 (s, 0.5H), 2.78 – 2.68 (m, 1.5H), 2.64 – 2.54 (m, 1H), 2.48 (dd,  $J = 5.5, 14.3$  Hz, 1H), 2.11 – 2.02 (m, 1H), 1.51 – 1.40 (m, 1H);  $^{13}\text{C}$  NMR (75 MHz,  $\text{CDCl}_3$ )  $\delta$  158.3, 137.6, 129.9, 129.9, 128.2, 128.2, 113.9, 111.4, 77.8, 67.2, 55.2, 37.8, 37.7, 34.8 (m), 32.9, 32.7, 32.6; IR (neat): 2962, 2360, 1612, 1583, 1498, 1453, 1260, 1155, 1037, 800  $\text{cm}^{-1}$ ; HRMS (ESI) calcd for  $[\text{M}+\text{H}]^+$   $\text{C}_{13}\text{H}_{16}\text{DO}_2$ : 206.1286, found: 206.1282.

**(±)-Tetrahydro-5-methyl-2,2-diphenylfuran (**26**) and (-)-**26**<sup>14</sup>**

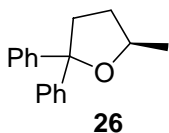

$\text{Cu}(\text{OTf})_2$  (9.1 mg, 0.0252 mmol, 20 mol%) and bis(oxazoline) **3**<sup>1</sup> (5.7 mg, 0.0315 mmol, 25 mol%) were put into a 12 mL pressure tube with a stirring bar.  $\text{PhCF}_3$  (0.6 mL) was syringed into the tube, and the vessel was refreshed with argon for 2 min, sealed and stirred at 60  $^\circ\text{C}$  for 2 hours. Upon cooling to room temperature,  $\text{K}_2\text{CO}_3$  (17.4 mg, 0.126 mmol, 1.0 equiv),  $\text{MnO}_2$  (32.8 mg, 0.378 mmol, 3.0 equiv) and 1,4-dicyclohexadiene (36  $\mu\text{L}$ , 0.378 mmol, 3.0 equiv.) were added. Alcohol **20** (30 mg, 0.126 mmol, 1.0 equiv.) was dissolved in  $\text{PhCF}_3$  (0.6 mL) in a 20 mL vial and the solution was transferred into the reaction tube. The vial was rinsed with  $\text{PhCF}_3$  (0.3 mL) and the rinse was added to the reaction. The tube was refreshed with argon for 2 minutes, sealed and stirred at 100  $^\circ\text{C}$ . After 24 hours, the reaction mixture was cooled to room temperature, diluted with  $\text{CH}_2\text{Cl}_2$  (3 mL) and vacuum filtered through a pad of silica gel (5 g). The silica gel was further rinsed with  $\text{EtOAc}$  ( $3 \times 30$  mL) and the combined filtrate was concentrated *in vacuo*. The residue was purified by flash column chromatography ( $\text{SiO}_2$ , 90:10 hexanes/ $\text{EtOAc}$ ) to afford 25 mg (83% yield) of **26** as a white solid. The analytical data was consistent with the literature:  $^1\text{H}$  NMR (500 MHz,  $\text{CDCl}_3$ )  $\delta$  7.50-7.47 (m, 4H), 7.34-7.20 (m, 6H), 4.31 (dd,  $J = 13.0, 6.6$  Hz, 1H), 2.70 (dt,  $J = 12.4, 7.3$  Hz, 1H), 2.58 (ddd,  $J = 12.4, 8.0, 6.3$  Hz, 1H), 2.07 (dtd,  $J = 13.9, 7.3, 6.5$  Hz, 1H), 1.68-1.63 (m, 1H), 1.40 (d,  $J = 5.0$  Hz, 3H). When (*R,R*)-Ph-Box and Method B were used, (-)-**26** was obtained as a colorless oil:  $[\alpha]_{\text{D}}^{17} = -4.25^\circ$  ( $c$  0.50,  $\text{CHCl}_3$ ). ee = 76%, determined by GC analysis (CP-Chirasil-Dex CB column):  $T_{\text{inj}} = 220^\circ\text{C}$ ,  $T_{\text{det}} = 275^\circ\text{C}$ , flow = 2 ml/min,  $t_{\text{i}} = 130^\circ\text{C}$ ,  $t_{\text{f}} = 220^\circ\text{C}$ , rate = 0.5  $^\circ\text{C}/\text{min}$ , retention times by using He as carrier gas:  $t_{\text{maj}} = 40.447$ ,  $t_{\text{min}} = 40.887$ .



(±)-*trans*-3-(4-Methoxybenzyl)-tetrahydro-2-methylfuran (**27**)

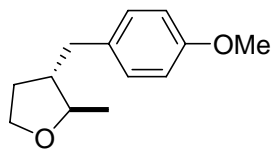**27**

Cu(OTf)<sub>2</sub> (13.6 mg, 0.0376 mmol, 20 mol%) and bis(oxazoline) **3**<sup>1</sup> (8.56 mg, 0.0470 mmol, 25 mol%) were put into a 12 mL pressure tube with a stirring bar. PhCF<sub>3</sub> (0.6 mL) was syringed into the tube, and the vessel was refreshed with argon for 2 min, sealed and stirred at 60 °C for 2 hours. Upon cooling to room temperature, K<sub>2</sub>CO<sub>3</sub> (26.0 mg, 0.188 mmol, 1.0 equiv), MnO<sub>2</sub> (49.0 mg, 0.564 mmol, 3.0 equiv) and 1,4-dicyclohexadiene (53 μL, 0.564 mmol, 3.0 equiv.) were added. Alcohol **10a** (39 mg, 0.188 mmol, 1.0 equiv.) was dissolved in PhCF<sub>3</sub> (1.0 mL) in a 20 mL vial and the solution was transferred into the reaction tube. The vial was rinsed with PhCF<sub>3</sub> (0.28 mL) and the rinse was added to the reaction. The tube was refreshed with argon for 2 minutes, sealed and stirred at 100 °C. After 24 hours, the reaction mixture was cooled to room temperature, diluted with CH<sub>2</sub>Cl<sub>2</sub> (3 mL) and vacuum filtered through a pad of silica gel (5 g). The silica gel was further rinsed with EtOAc (3 × 30 mL) and the combined filtrate was concentrated *in vacuo*. The residue was purified by flash column chromatography (SiO<sub>2</sub>, 90:10 hexanes/EtOAc) to afford 32 mg (82% yield) of **27** as a clear oil. <sup>1</sup>H NMR (500 MHz, CDCl<sub>3</sub>) δ 7.13 (d, *J* = 8.7 Hz, 2H), 6.87 (d, *J* = 8.6 Hz, 2H), 3.89-3.84 (m, 1H), 3.83 (s, 3H), 3.82-3.81 (m, 1H), 3.65-3.61 (m, 1H), 2.74 (dd, *J* = 13.7, 5.9 Hz, 1H), 2.55 (dd, *J* = 13.7, 5.7 Hz, 1H), 2.04 – 1.96 (m, 2H), 1.67 (t, *J* = 9.9 Hz, 1H), 1.20 (d, *J* = 6.1 Hz, 3H); <sup>13</sup>C NMR (75 MHz, CDCl<sub>3</sub>) δ 157.90, 132.67, 129.61, 113.76, 80.08, 66.55, 55.21, 48.18, 37.91, 32.66, 19.85; IR (neat): 2957, 2927, 2866, 2839, 1611, 1512, 1454, 1299, 1246, 1177, 1034, 804 cm<sup>-1</sup>; HRMS (EI) calcd for [M]<sup>+</sup> C<sub>13</sub>H<sub>18</sub>O<sub>2</sub>: 206.1301, found: 206.1304. The relative stereochemistry of **27** was assigned by analogy to similar literature compounds (O-CH-CH<sub>3</sub> for *cis*-isomer: 1.05 (d, *J* = 6 Hz, 3H) and O-CH-CH<sub>3</sub> for *trans*-isomer: 1.15 (d, *J* = 6 Hz, 3H)).<sup>15-16</sup>

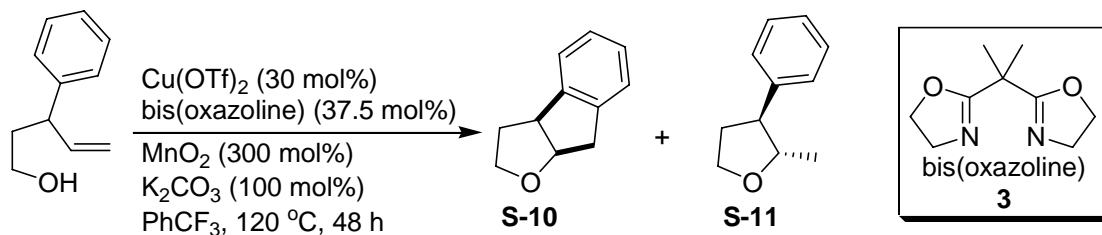

Tetrahydroindenofuran **S-10** and tetrahydrofuran **S-11**<sup>4</sup> were obtained from the catalytic carboetherification (Method A, reaction run at 120 °C for 48 h with 30 mol% catalyst loading) of 3-phenylpent-4-en-1-ol as a clear oil. The product is volatile, and the <sup>1</sup>H NMR yield is given (64%, 2:1 mixture of **S-10** and **S-11**). Tentative <sup>1</sup>H NMR and HRMS of **S-10** are also given: <sup>1</sup>H NMR (500 MHz, CDCl<sub>3</sub>) δ 7.28 – 7.22 (m, 4H), 4.80 (t, *J* = 6.0 Hz, 1H), 4.08 – 4.05 (m, 1H), 3.87-3.83 (m, 1H), 3.65 (ddd, *J* = 8.6, 4.3, 0.6 Hz, 1H), 3.25 (dd, *J* = 17.4, 5.4 Hz, 1H), 3.12 (d, *J* = 17.4 Hz, 1H), 2.41-2.35 (m, 1H), 2.15-2.10 (m, 1H); HRMS (EI) calcd for [M]<sup>+</sup> C<sub>11</sub>H<sub>12</sub>O: 160.0883, found: 160.0877.

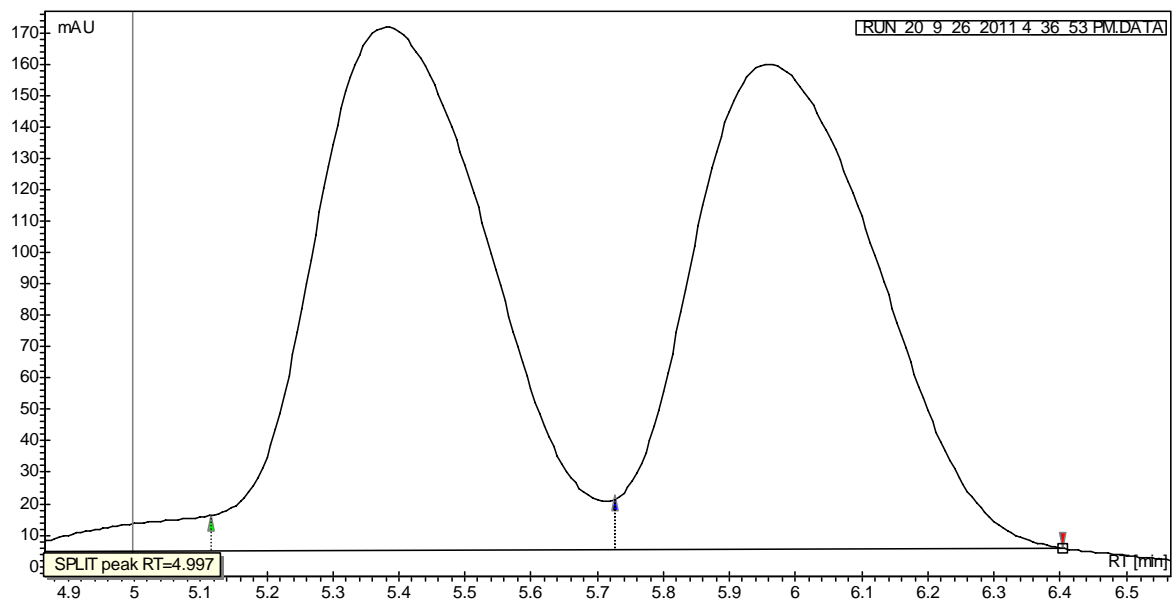

| # | Time [min] | Area [%] |
|---|------------|----------|
| 1 | 5.38       | 50.379   |
| 2 | 5.96       | 49.621   |

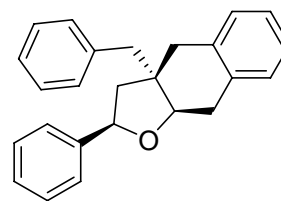**17a**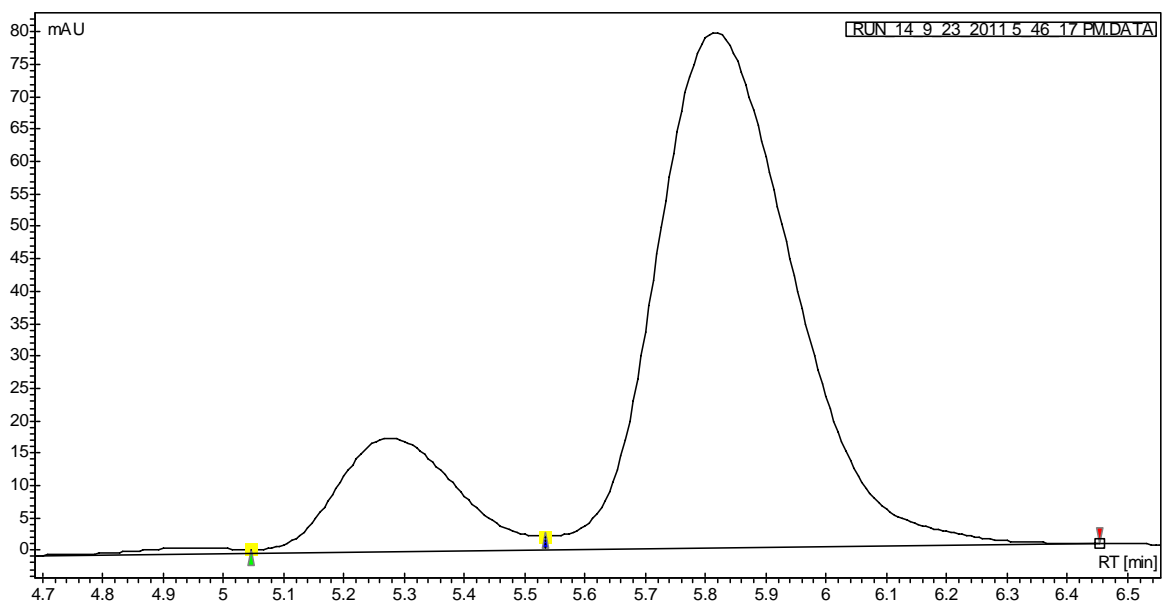

| # | Time [min] | Area [%] |
|---|------------|----------|
| 1 | 5.27       | 16.273   |
| 2 | 5.81       | 83.727   |

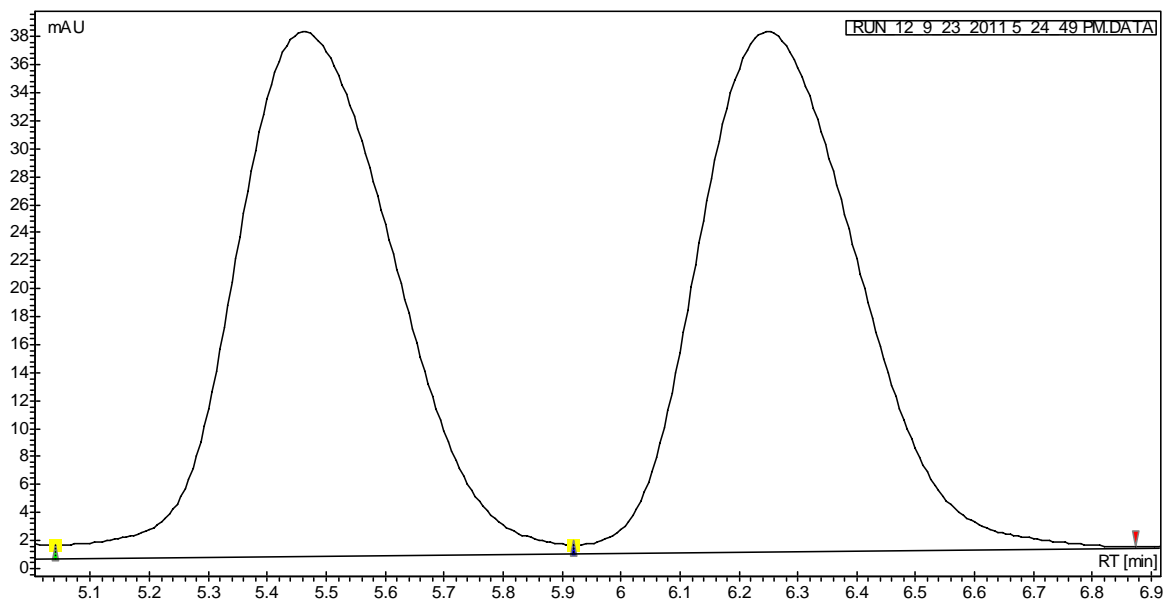

| # | Time [min] | Area [%] |
|---|------------|----------|
| 1 | 5.46       | 50.278   |
| 2 | 6.25       | 49.722   |

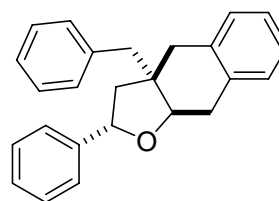**16a**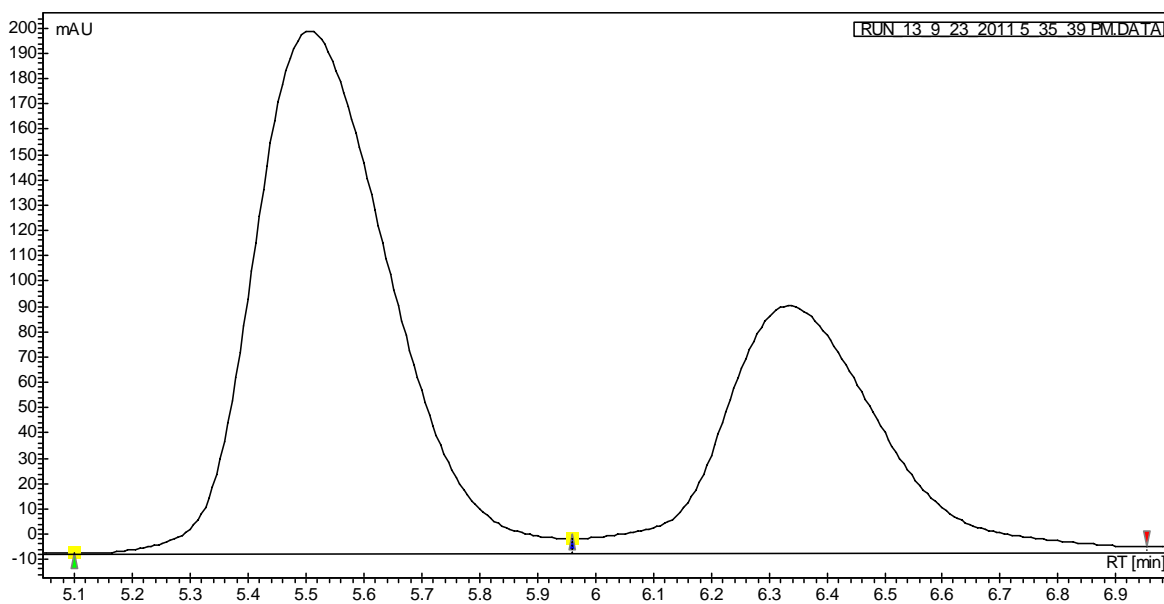

| # | Time [min] | Area [%] |
|---|------------|----------|
| 1 | 5.51       | 65.308   |
| 2 | 6.33       | 34.692   |

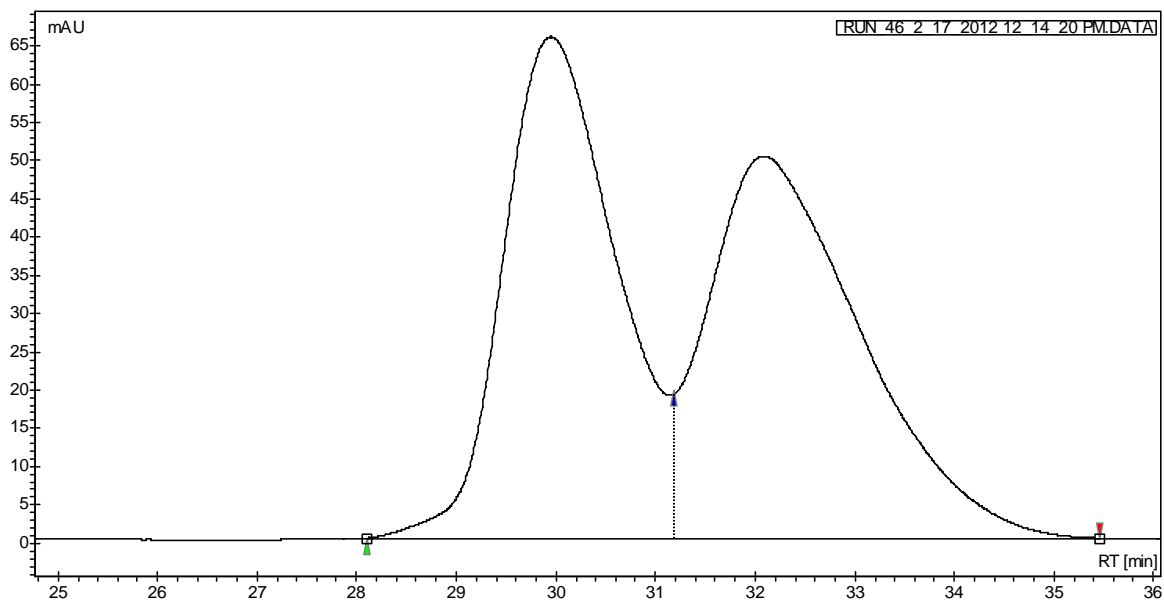

| # | Time [min] | Area [%] |
|---|------------|----------|
| 1 | 29.95      | 49.435   |
| 2 | 32.09      | 50.565   |

ee was estimated to be 75% because of incomplete separation.

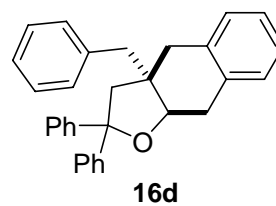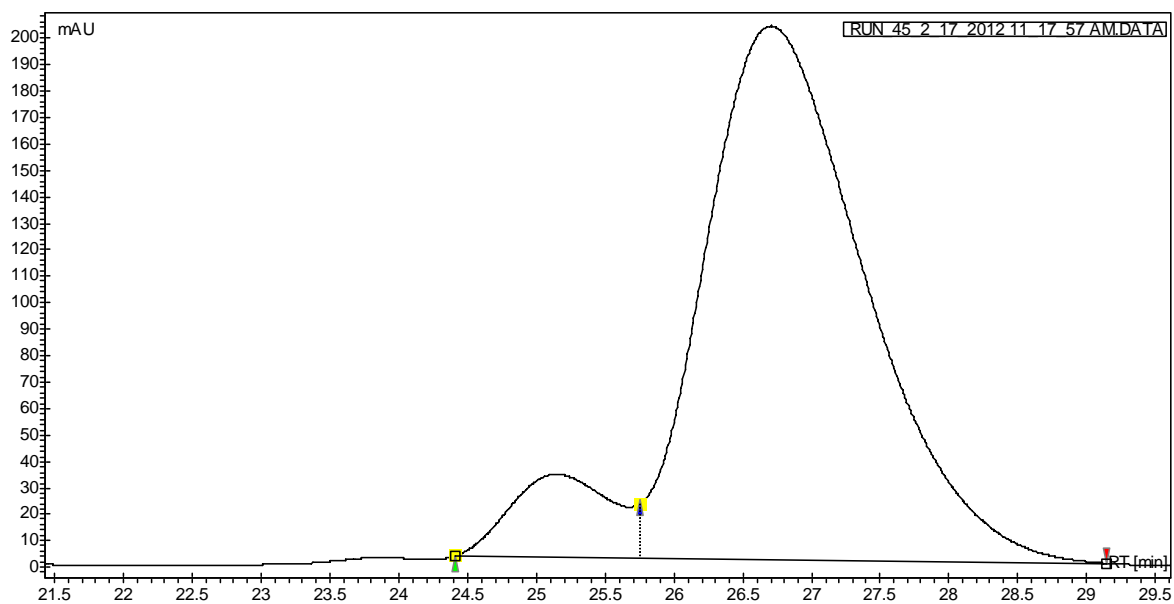

| # | Time [min] | Area [%] |
|---|------------|----------|
| 1 | 25.15      | 9.076    |
| 2 | 26.71      | 90.924   |

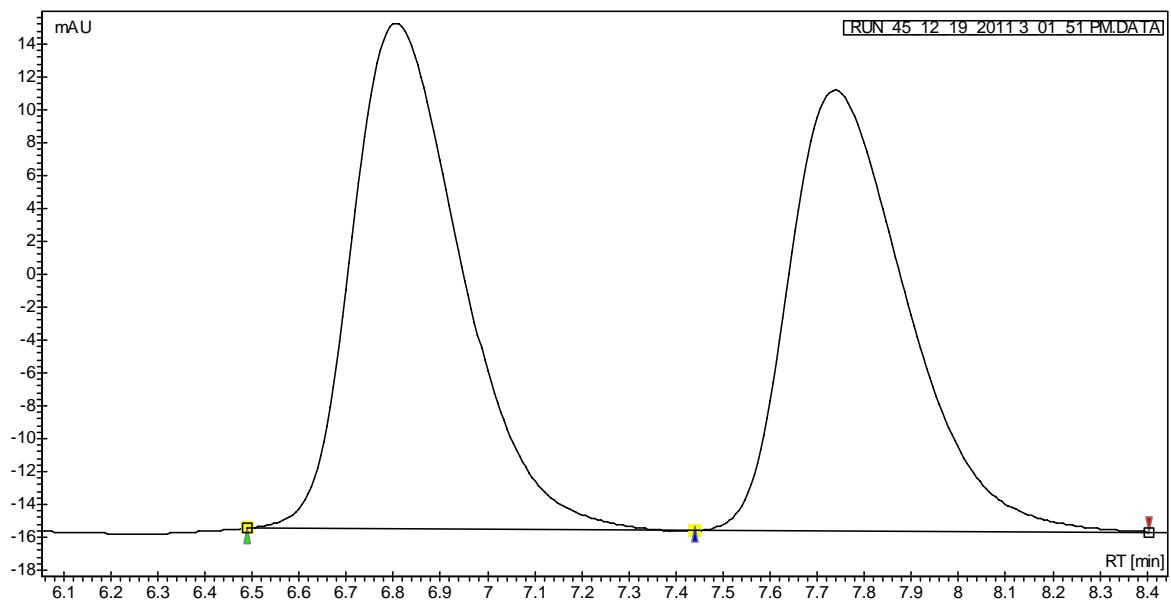

| # | Time [min] | Area [%] |
|---|------------|----------|
| 1 | 6.81       | 50.510   |
| 2 | 7.74       | 49.490   |

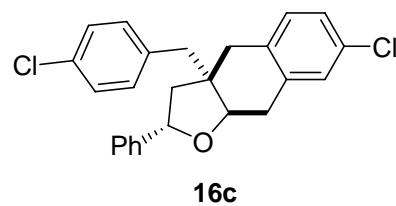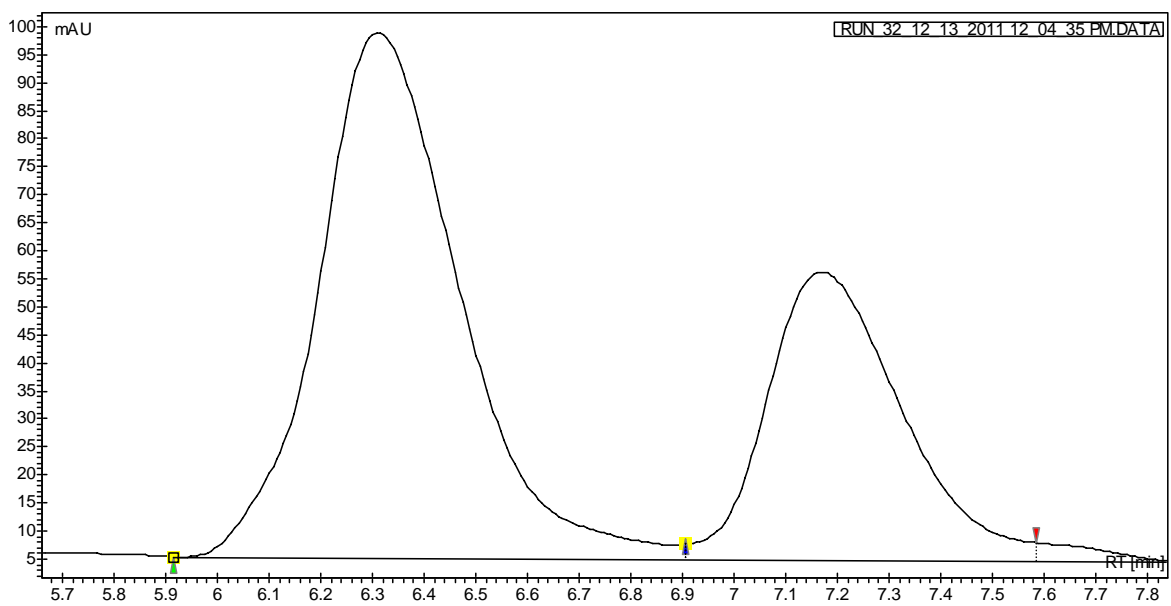

| # | Time [min] | Area [%] |
|---|------------|----------|
| 1 | 6.31       | 65.716   |
| 2 | 7.17       | 34.284   |

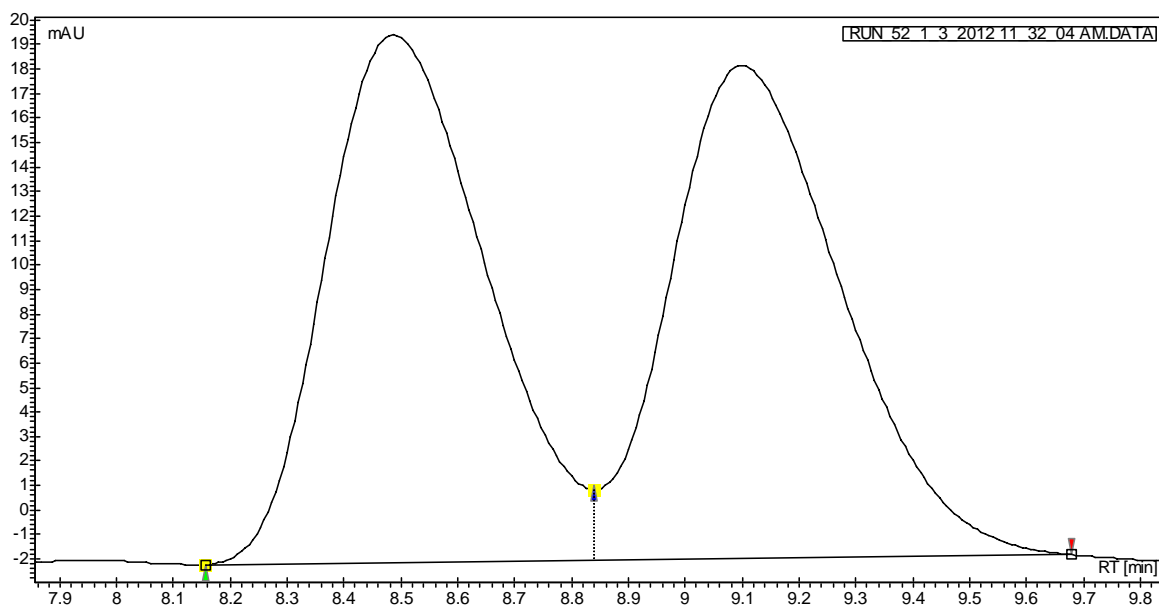

| # | Time [min] | Area [%] |
|---|------------|----------|
| 1 | 8.49       | 49.865   |
| 2 | 9.10       | 50.135   |

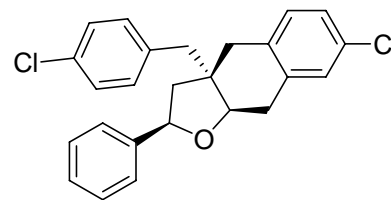

17c

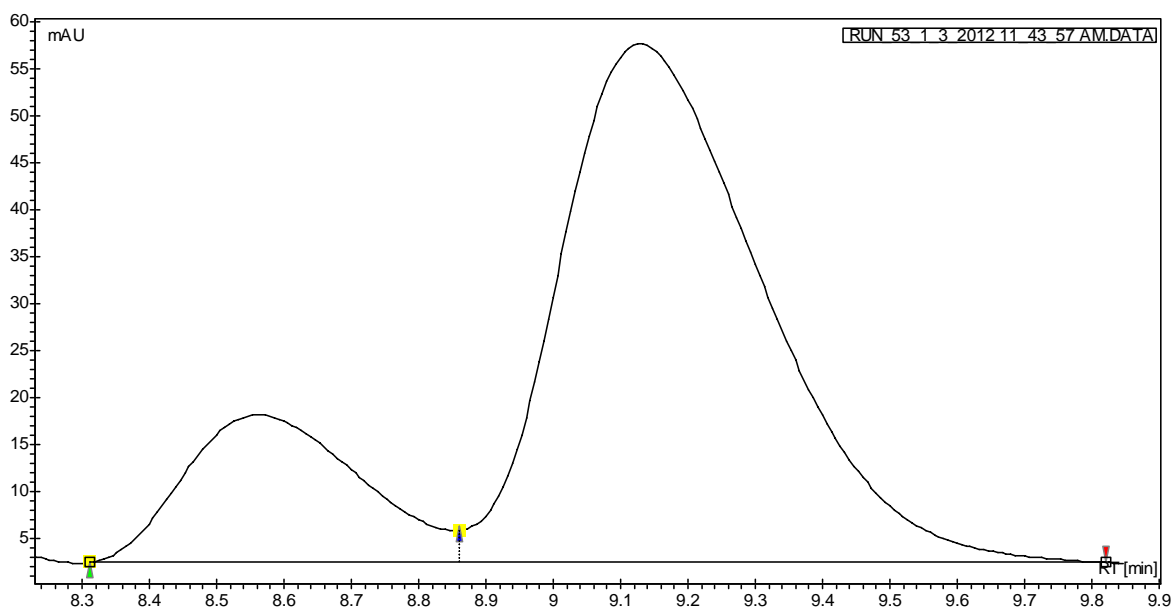

| # | Time [min] | Area [%] |
|---|------------|----------|
| 1 | 8.56       | 19.858   |
| 2 | 9.13       | 80.142   |

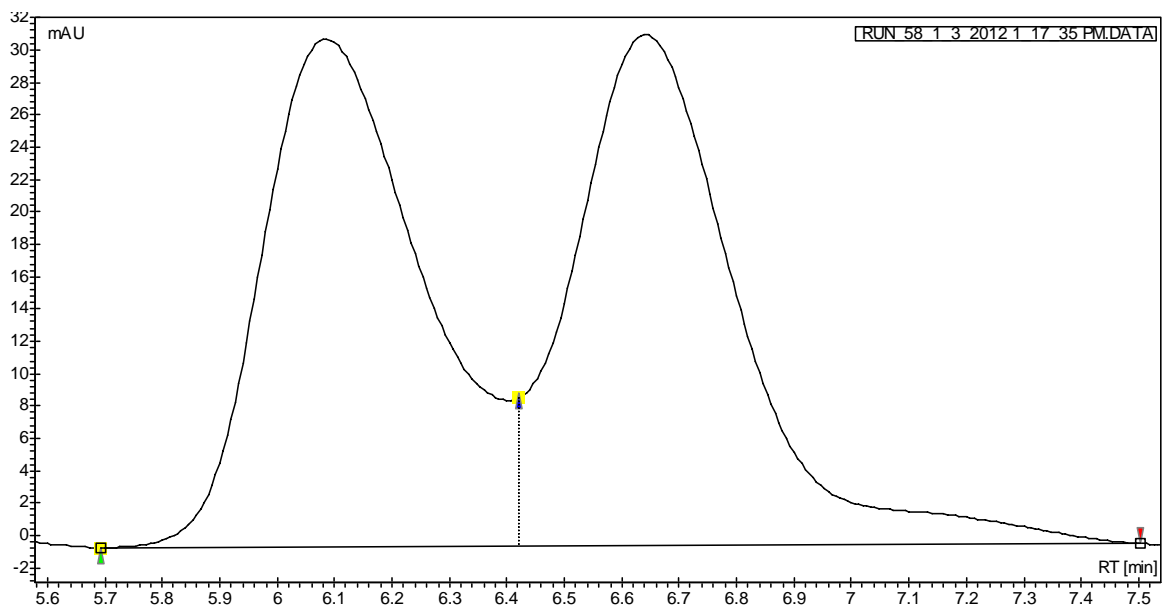

| # | Time [min] | Area [%] |
|---|------------|----------|
| 1 | 6.09       | 49.437   |
| 2 | 6.64       | 50.563   |

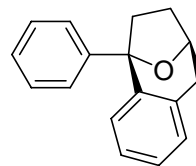**21**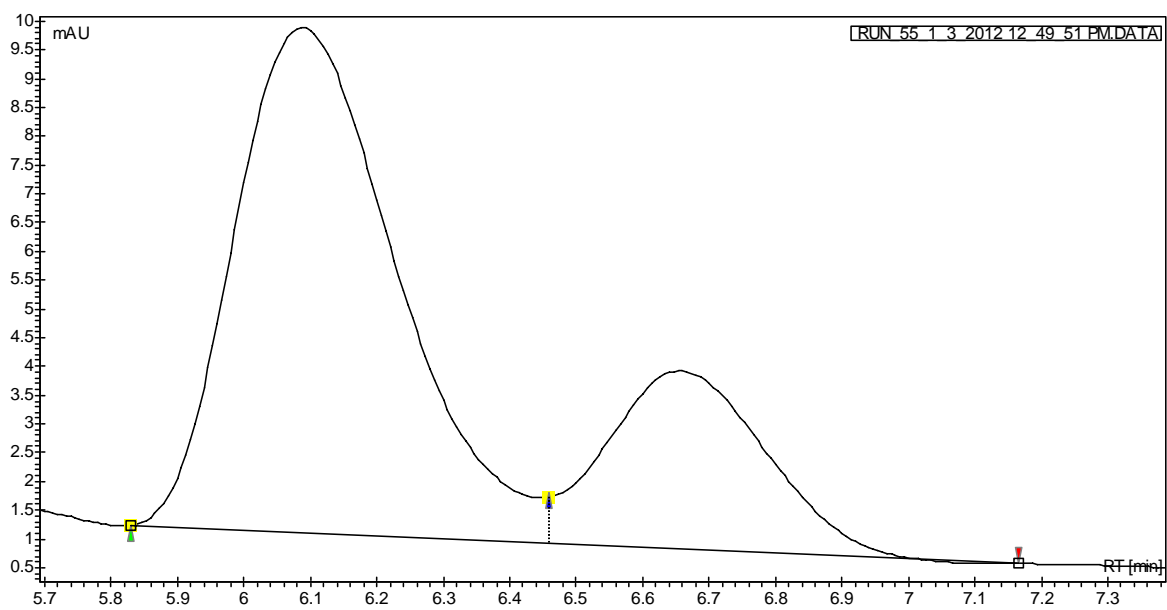

| # | Time [min] | Area [%] |
|---|------------|----------|
| 1 | 6.09       | 75.462   |
| 2 | 6.65       | 24.538   |

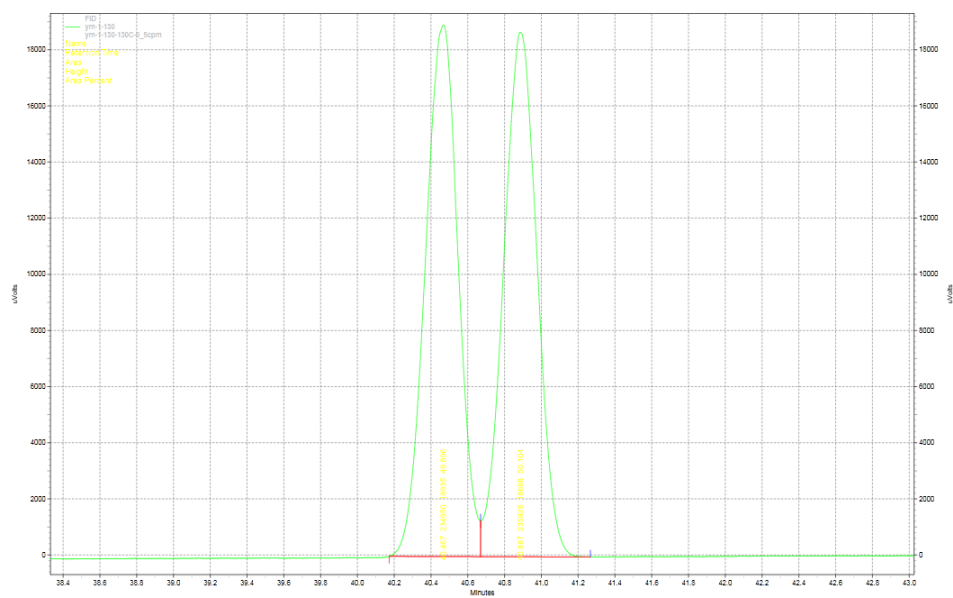

| # | Time [min] | Area [%] |
|---|------------|----------|
| 1 | 40.467     | 49.90    |
| 2 | 40.887     | 50.10    |

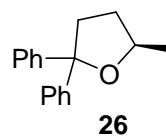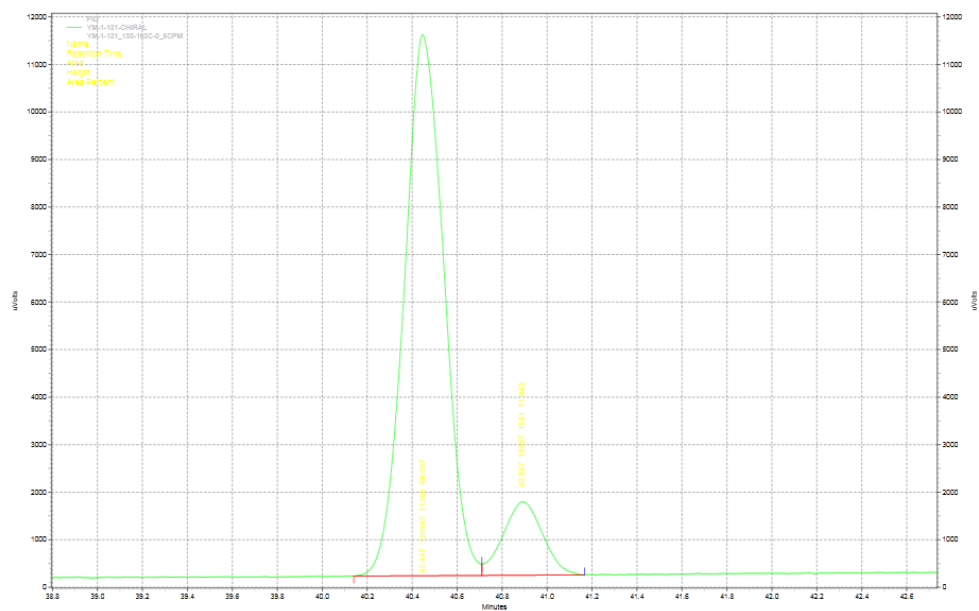

C:\EZStart\Projects\DefaultData\Chemler\YM-1-131\_130-163C-0\_5CPM, FID

| # | Time [min] | Area [%] |
|---|------------|----------|
| 1 | 40.447     | 88.06    |
| 2 | 40.887     | 11.94    |



## References

1. Miao, L.; Haque, I.; Manzoni, M. R.; Tham, W. S.; Chemler, S. R. *Org. Lett.* **2010**, *12*, 4739.
2. Delhaye, L.; Merschaert, A.; Diker, K.; Houpis, I. N. *Synthesis*, **2006**, *9*, 1437.
3. Bunce, R. A.; Childress, R. S. *Org. Prep. Proced. Int.* **1995**, *27*, 122.
4. Qian, H.; Han, X.; Widenhoefer, R. A. *J. Am. Chem. Soc.* **2004**, *126*, 9536.
5. Hatano, M.; Ito, O.; Suzuki, S.; Ishihara, K. *J. Org. Chem.* **2010**, *75*, 5008.
6. Jeong, Y.; Kim, D.; Choi, Y., Ryu, J. *Org. Biomol. Chem.* **2011**, *9*, 374.
7. Komeyama, K.; Morimoto, T.; Nakayama, Y.; Takaki, K. *Tetrahedron Lett.* **2007**, *48*, 3259.
8. Ni, Y.; Kassab, R. M.; Chevliakov, M. V.; Montgomery, J. *J. Am. Chem. Soc.* **2009**, *131*, 17714.
9. Bélanger, D.; Tong, X.; Soumaré, S.; Dory, Y. L.; Zhao, Y. *Chem. Eur. J.* **2009**, *15*, 4428.
10. Ziegler, F. E.; Sarpong, M. A. *Tetrahedron* **2003**, *59*, 9013.
11. Orain, D.; Guillemin, J.-C. *J. Org. Chem.* **1999**, *64*, 3563.
12. Solorio, D. M.; Jennings, M. P. *J. Org. Chem.* **1999**, *64*, 3563.
13. Fananas, F. J.; Fernandez, A.; Cevic, D.; Rodriguez, F. *J. Org. Chem.* **1999**, *64*, 3563.
14. Nishida, S.; Fujioka, T.; Shemizu, N. *J. Organomet. Chem.* **1976**, *166*, 37.
15. Kelly, B. D.; Allen, J. M.; Tundel, R. E.; Lambert, T. H. *Org. Lett.* **2009**, *11*, 1381.
16. Frauenrath, H.; Philipps, T. *Liebigs. Ann. Chem.* **1985**, *10*, 1951.
